# Supplementary material for: Modified McFadyen–Stevens reaction for a versatile synthesis of aliphatic/aromatic aldehydes: design, optimization, and mechanistic investigations
Source: Royal Society of Chemistry journal article supplement (doi:10.1039/c2sc22045h), 2012-12-11

*Electronic Supplementary Information for*

***Modified McFadyen-Stevens Reaction for a Versatile Synthesis of  
Aliphatic/Aromatic Aldehydes: Design, Optimization, and  
Mechanistic Investigations***

Yuri Iwai, Takashi Ozaki, Ryo Takita, Masanobu Uchiyama  
Jun Shimokawa and Tohru Fukuyama\*

*Graduate School of Pharmaceutical Sciences, University of Tokyo*  
*7-3-1 Hongo, Bunkyo-ku, Tokyo 113-0033, Japan*  
fukuyama@mol.f.u-tokyo.ac.jp

**Table of contents**

|                                                          |          |
|----------------------------------------------------------|----------|
| General Methods ·····                                    | S2       |
| Experimental Procedures ·····                            | S3–S43   |
| Computational Section ·····                              | S44–S48  |
| <sup>1</sup> H NMR and <sup>13</sup> C NMR spectra ····· | S48–S139 |

**General.** All non-aqueous reactions were carried out under an inert atmosphere of argon in oven-dried glassware unless otherwise noted. Dehydrated tetrahydrofuran, methylene chloride and toluene were purchased from Kanto Chemicals Co., Inc. and were purified using a Glass Contour Solvent System. Dehydrated *N,N*-dimethylformamide was purchased from Wako Pure Chemical Industries, Ltd. and stored over activated MS4A. Dehydrated methanol and acetonitrile were also purchased from Wako Pure Chemical Industries, Ltd. and stored over activated MS3A. All reagents were commercially available and used without further purification. Analytical thin layer chromatography (TLC) was performed on Merck precoated analytical plates, 0.25 mm thick, silica gel 60F<sub>254</sub>. Preparative thin layer chromatography (pTLC) was performed on Merck precoated analytical plates, 0.50 mm thick, silica gel 60F<sub>254</sub>. Preparative flash chromatography was performed using Silica Gel 60 (spherical, 40-100 mm) or Silica Gel 60N (spherical, neutral, 40-100 mm) purchased from Kanto Chemical Co., Inc. <sup>1</sup>H and <sup>13</sup>C NMR were recorded on a JEOL ECX-400 spectrometer. All <sup>1</sup>H NMR spectra are reported in  $\delta$  units, parts per million (ppm) downfield from tetramethylsilane as the internal standard and coupling constants are indicated in Hertz (Hz). The following abbreviations are used for spin multiplicity: s = singlet, d = doublet, t = triplet, q = quartet, m = multiplet, br = broad. All <sup>13</sup>C NMR spectra are reported in ppm relative to the central line of the triplet for CDCl<sub>3</sub> at 77.0 ppm. Infrared spectra (IR) were recorded on a FT/IR-4100 Fourier Transform Infrared Spectrophotometer, and are reported in wavenumbers (cm<sup>-1</sup>). High resolution mass spectra (HRMS) were obtained on a JEOL JMS-T100LP AccuTOF LC-plus in positive electrospray ionization (ESI) method using PEG as the internal standard. Melting points, determined on a Yanaco Micro Melting Point Apparatus, are uncorrected.

***tert*-Butyl 2-tosylhydrazinecarboxylate (**10**)**

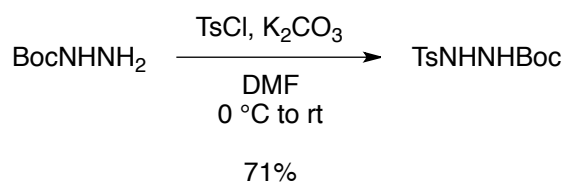

To a solution of *tert*-butyl carbazate (3.96 g, 30.0 mmol) in DMF (20 mL) at 0 °C was added K<sub>2</sub>CO<sub>3</sub> (4.56 g, 33.0 mmol) and *p*-toluenesulfonyl chloride (5.72 g, 30.0 mmol) in three portions, and the mixture was allowed to warm to room temperature. After 1 h, the reaction mixture was diluted with EtOAc (10 mL), quenched with saturated NH<sub>4</sub>Cl aq. (10 mL) and partitioned between EtOAc (20 mL) and H<sub>2</sub>O (10 mL). The organic phase was collected and the aqueous phase was extracted with EtOAc (20 mL) twice. The combined organic layer was washed with 1.0 M HCl aq. (10 mL), 10% NaCl aq. (15 mL) twice and brine (15 mL), dried over anhydrous Na<sub>2</sub>SO<sub>4</sub>, filtered and concentrated *in vacuo*. The residue was purified by flash column chromatography on silica gel (20% EtOAc in *n*-hexane). Subsequent trituration from 5% toluene in *n*-hexane gave **10** as a white powder (6.71 g, 23.4 mmol, 71%).

R<sub>f</sub> = 0.61 (*n*-hexane/EtOAc = 1:1, UV, Ce-PMA); M.p. 97.1–97.5 °C; IR (neat, cm<sup>-1</sup>) 1722, 1710, 1597, 1493, 1369, 1343; <sup>1</sup>H NMR (CDCl<sub>3</sub>, 400 MHz) δ 1.24 (s, 9H), 2.42 (s, 3H), 6.50 (brs, 2H), 7.31 (d, *J* = 8.2 Hz, 2H), 7.81 (d, *J* = 8.2 Hz, 2H); <sup>13</sup>C NMR (CDCl<sub>3</sub>, 100 MHz) δ 154.1, 144.6, 133.5, 129.5, 128.7, 82.3, 27.7, 21.6; HRMS calcd for C<sub>23</sub>H<sub>24</sub>N<sub>2</sub>NaO<sub>5</sub>S ([M + Na<sup>+</sup>]) 309.0885, found 309.0887.

***tert*-Butyl 2-(2-naphthoyl)-2-tosylhydrazinecarboxylate (**11**)**

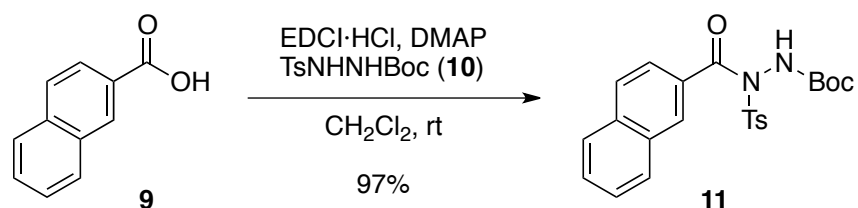

To a solution of 2-naphthoic acid (**9**, 172 mg, 1.00 mmol) in  $\text{CH}_2\text{Cl}_2$  (10 mL) at room temperature was added EDCI·HCl (230 mg, 1.20 mmol), 4-dimethylaminopyridine (12.2 mg, 0.10 mmol) and TsNHNHBoc (**10**, 286 mg, 1.00 mmol). After 2 h, the reaction was quenched with saturated  $\text{NH}_4\text{Cl}$  aq. (5 mL) and partitioned between EtOAc (20 mL) and  $\text{H}_2\text{O}$  (10 mL). The organic phase was collected and the aqueous phase was extracted with EtOAc (20 mL) twice. The combined organic extract was washed with brine (10 mL), dried over anhydrous  $\text{Na}_2\text{SO}_4$ , filtered and concentrated *in vacuo*. The residue was purified by flash column chromatography on silica gel (15% EtOAc in *n*-hexane) to afford **11** as a white powder (427.2 mg, 0.97 mmol, 97%).

$R_f$  = 0.53 (*n*-hexane/EtOAc = 2:1, UV, Ce-PMA); M.p. 157.5–157.8 °C; IR (neat,  $\text{cm}^{-1}$ ) 1734, 1715, 1700, 1507, 1249;  $^1\text{H}$  NMR ( $\text{CDCl}_3$ , 400 MHz)  $\delta$  8.15 (s, 1H), 8.09 (d,  $J$  = 8.2 Hz, 2H), 7.85–7.81 (m, 3H), 7.63 (br, 1H), 7.59–7.50 (m, 2H), 7.37 (d,  $J$  = 7.8 Hz, 2H), 7.19 (brs, 1H), 2.46 (s, 3H), 1.32 (s, 9H);  $^{13}\text{C}$  NMR ( $\text{CDCl}_3$ , 100 MHz)  $\delta$  188.4, 183.0, 182.9, 165.1, 145.6, 134.5, 132.1, 129.9, 129.4, 129.0, 127.8, 127.7, 126.9, 124.5, 83.2, 28.0, 21.7; HRMS calcd for  $\text{C}_{23}\text{H}_{24}\text{N}_2\text{NaO}_5\text{S}$  ( $[\text{M} + \text{Na}^+]$ ) 463.1304, found 463.1299.

***N*-(2-Naphthoyl)-4-methylbenzenesulfonohydrazide (**12**)**

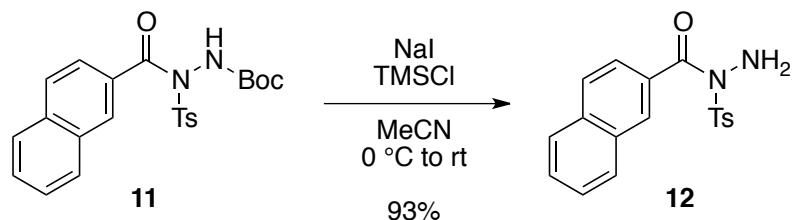

To a stirred solution of **11** (436 mg, 0.99 mmol) in MeCN (5.0 mL) at 0 °C was added NaI (445 mg, 2.97 mmol) and TMSCl (250  $\mu\text{L}$ , 1.98 mmol) and the mixture was warmed to room temperature. After 30 min, the reaction was quenched with saturated  $\text{NH}_4\text{Cl}$  aq. (5 mL) and partitioned between EtOAc (30 mL) and  $\text{H}_2\text{O}$  (10 mL). The organic phase was collected and the



aqueous phase was extracted with EtOAc (20 mL) twice. The combined organic extract was washed with saturated  $\text{Na}_2\text{S}_2\text{O}_3$  aq. (20 mL) and brine (20 mL), dried over anhydrous  $\text{Na}_2\text{SO}_4$ , filtered and concentrated *in vacuo*. The residue was purified by flash column chromatography on silica gel (EtOAc in *n*-hexane, 20 to 50%) to afford **12** as a white powder (313 mg, 0.92 mmol, 93%).

$R_f$  = 0.68 (*n*-hexane/EtOAc = 1:1, UV, Ce-PMA); M.p. 160.5–160.9 °C; IR (neat,  $\text{cm}^{-1}$ ) 1681, 1354, 1291, 1168;  $^1\text{H}$  NMR ( $\text{CDCl}_3$ , 400 MHz)  $\delta$  8.31 (s, 1H), 7.93–7.86 (m, 5H), 7.79 (d,  $J$  = 8.2 Hz, 1H), 7.61–7.52 (m, 2H), 7.36 (d,  $J$  = 8.3 Hz, 2H), 4.52 (s, 2H), 2.46 (s, 1H);  $^{13}\text{C}$  NMR ( $\text{CDCl}_3$ , 100 MHz)  $\delta$  171.2, 145.2, 134.9, 133.5, 131.9, 130.9, 130.7, 129.4, 129.0, 128.9, 128.1, 127.6, 127.2, 126.5, 125.4, 21.5; HRMS calcd for  $\text{C}_{18}\text{H}_{16}\text{N}_2\text{NaO}_3\text{S}$  ( $[\text{M} + \text{Na}^+]$ ) 363.0779, found 363.0781.

## 2-Naphthaldehyde (**13**)

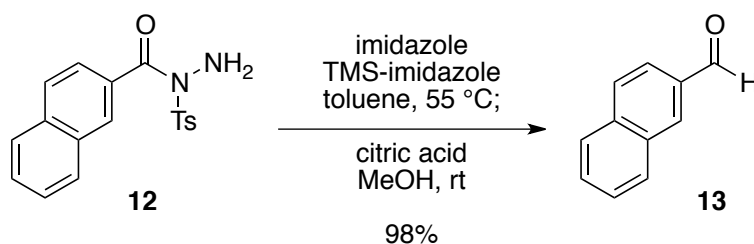

To a solution of **12** (200 mg, 0.59 mmol) in toluene (2.5 mL) at room temperature was added TMS-imidazole (170  $\mu\text{L}$ , 1.18 mmol). After stirring for 5 min, the reaction mixture was added imidazole (80 mg, 1.18 mmol) and the reaction was warmed to 55 °C. After 6 h, the reaction was added 1.0 M citric acid in MeOH (6.0 mL) at room temperature and stirred for additional 1 h. The resulting mixture was partitioned between EtOAc (10 mL) and saturated  $\text{NaHCO}_3$  aq. (6 mL). The organic phase was collected and the aqueous phase was extracted with EtOAc (10 mL) twice. The combined organic extract was washed with brine (10 mL), dried over anhydrous  $\text{Na}_2\text{SO}_4$ , filtered and concentrated *in vacuo*. The residue was purified by flash column chromatography on neutral silica gel (EtOAc in *n*-hexane, 10 to 15%) to afford **13** as a white powder (90.3 mg, 0.58 mmol, 98%).

$R_f$  = 0.68 (*n*-hexane/EtOAc = 2:1, UV, Ce-PMA, 2,4-DNP); M.p. 58.5–59.0 °C; IR (neat,  $\text{cm}^{-1}$ ) 1695, 1627, 1451, 1364, 1267;  $^1\text{H}$  NMR ( $\text{CDCl}_3$ , 400 MHz)  $\delta$  10.17 (dd,  $J$  = 7.3, 1.8 Hz, 1H), 8.35 (s, 1H), 8.02–7.91 (m, 4H), 7.67–7.58 (m, 2H);  $^{13}\text{C}$  NMR ( $\text{CDCl}_3$ , 100 MHz)  $\delta$  192.2, 136.5, 134.5, 134.1, 132.6, 129.5, 129.1, 128.1, 127.1, 122.8; HRMS calcd for  $\text{C}_{11}\text{H}_8\text{O}$  ( $[\text{M}^+]$ ) 156.0575, found 156.0571.

***tert*-Butyl 2-(4-iodobenzoyl)-2-tosylhydrazinecarboxylate (**S1a**)**

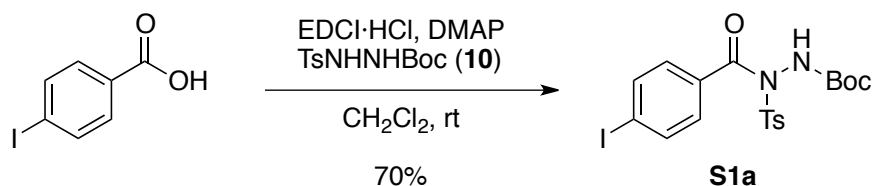

To a solution of 4-iodobenzoic acid (248 mg, 1.00 mmol) in  $\text{CH}_2\text{Cl}_2$  (10 mL) at room temperature was added EDCI·HCl (230 mg, 1.20 mmol), 4-dimethylaminopyridine (12.2 mg, 0.10 mmol) and TsNHNHBoc (**10**, 286 mg, 1.00 mmol). After 2 h, the resulting solution was quenched with saturated  $\text{NH}_4\text{Cl}$  aq. (5 mL) and partitioned between EtOAc (20 mL) and  $\text{H}_2\text{O}$  (5 mL). The organic phase was collected and the aqueous phase was extracted with EtOAc (20 mL) twice. The combined organic extract was washed with brine (10 mL) twice, dried over anhydrous  $\text{Na}_2\text{SO}_4$ , filtered and concentrated *in vacuo*. The residue was purified by flash column chromatography on silica gel (10% EtOAc in *n*-hexane) to afford **S1a** as a white powder (361 mg, 0.70 mmol, 70%).

$R_f$  = 0.45 (*n*-hexane/EtOAc = 2:1, UV, Ce-PMA); M.p. 147.0–149.0 °C; IR (neat,  $\text{cm}^{-1}$ ) 1739, 1715, 1369, 1247, 1171;  $^1\text{H}$  NMR ( $\text{CDCl}_3$ , 400 MHz)  $\delta$  8.03 (d,  $J$  = 8.7 Hz, 2H), 7.72 (d,  $J$  = 7.4 Hz, 2H), 7.35 (d,  $J$  = 8.2 Hz, 2H), 7.32 (d,  $J$  = 7.4 Hz, 2H), 7.10 (br, 1H), 2.45 (s, 3H), 1.36 (s, 9H);  $^{13}\text{C}$  NMR ( $\text{CDCl}_3$ , 100 MHz)  $\delta$  168.9, 153.6, 145.7, 137.3, 134.2, 132.3, 129.9, 129.8, 98.9, 83.4, 27.8, 21.8; HRMS calcd for  $\text{C}_{19}\text{H}_{21}\text{IN}_2\text{NaO}_5\text{S}$  ( $[\text{M} + \text{Na}^+]$ ) 539.0114, found 539.0120.

***N*-(4-Iodobenzoyl)-4-methylbenzenesulfonylhydrazide (**S1b**)**

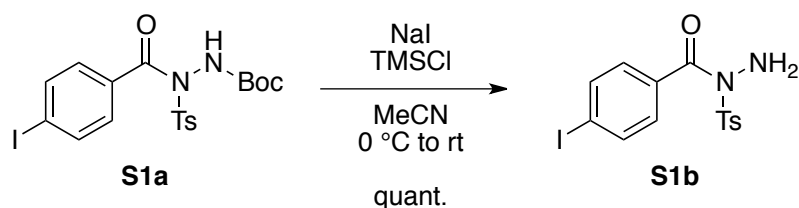

To a stirred solution of **S1a** (361 mg, 0.70 mmol) in MeCN (7.0 mL) at 0 °C was added NaI (315 mg, 2.10 mmol) and TMSCl (180  $\mu\text{L}$ , 1.40 mmol). The mixture was warmed to room temperature. After 30 min, the reaction was quenched with saturated  $\text{NH}_4\text{Cl}$  aq. (5 mL) and partitioned between EtOAc (30 mL) and  $\text{H}_2\text{O}$  (10 mL). The organic phase was collected and the aqueous phase was extracted with EtOAc (10 mL) twice. The combined organic extract was washed with saturated  $\text{Na}_2\text{S}_2\text{O}_3$  aq. (20 mL) and brine (20 mL), dried over anhydrous  $\text{Na}_2\text{SO}_4$ , filtered and concentrated *in vacuo*. The residue was crystallized from toluene (5 mL) and *n*-hexane (20 mL) to

afford **S1b** as a white powder (293 mg, 0.70 mmol, 100%).

$R_f$  = 0.41 (*n*-hexane/EtOAc = 2:1, UV, Ce-PMA); M.p. 157.5-158.0 °C; IR (neat,  $\text{cm}^{-1}$ ) 1683, 1653, 1541, 1507, 1338;  $^1\text{H}$  NMR ( $\text{CDCl}_3$ , 400 MHz)  $\delta$  7.88 (d,  $J$  = 8.2 Hz, 2H), 7.77 (d,  $J$  = 8.2 Hz, 2H), 7.46 (d,  $J$  = 8.3 Hz, 2H), 7.35 (d,  $J$  = 8.7 Hz, 2H), 4.45 (s, 2H), 2.45 (s, 3H);  $^{13}\text{C}$  NMR ( $\text{CDCl}_3$ , 100 MHz)  $\delta$  170.7, 145.8, 137.3, 133.7, 133.2, 131.4, 129.9, 129.3, 100.0, 22.0; HRMS calcd for  $\text{C}_{14}\text{H}_{13}\text{IN}_2\text{NaO}_3\text{S}$  ( $[\text{M} + \text{Na}^+]$ ) 438.9589, found 438.9577.

#### 4-Iodobenzaldehyde (**S1c**)

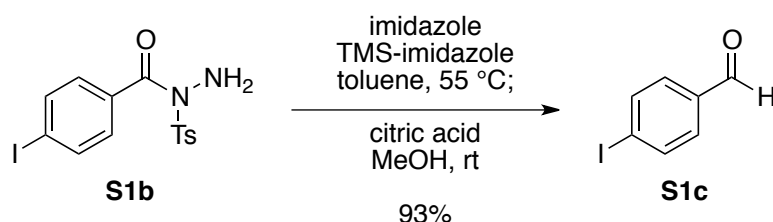

To a solution of **S1b** (200 mg, 0.48 mmol) in toluene (3.5 mL) at room temperature was added TMS-imidazole (140  $\mu\text{L}$ , 0.96 mmol). After stirring for 5 min, the reaction mixture was added imidazole (65.4 mg, 0.96 mmol) and stirring was continued at 55 °C. After 6 h, the reaction was added 1.0 M citric acid in MeOH (5.0 mL) at room temperature and stirred for additional 1 h. The resulting mixture was partitioned between EtOAc (20 mL) and saturated  $\text{NaHCO}_3$  aq. (6 mL). The organic phase was collected and the aqueous phase was extracted with EtOAc (20 mL) twice. The combined organic extract was washed with brine, dried over anhydrous  $\text{Na}_2\text{SO}_4$ , filtered and concentrated *in vacuo*. The residue was purified by flash column chromatography on neutralized silica gel (3% EtOAc in *n*-hexane) to afford **S1c** as a white powder (103.3 mg, 0.45 mmol, 93%).

***tert*-Butyl 2-(4-(methoxycarbonyl)benzoyl)-2-tosylhydrazinecarboxylate  
(S2a)**

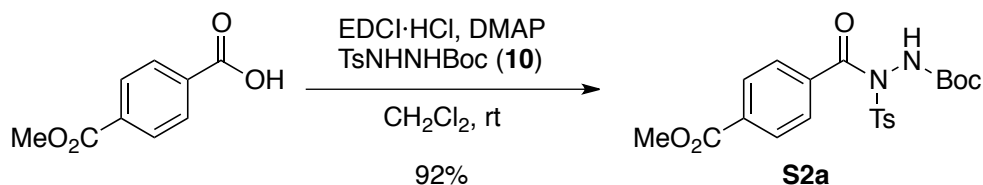

To a solution of 4-(methoxycarbonyl)benzoic acid (180 mg, 1.00 mmol) in CH<sub>2</sub>Cl<sub>2</sub> (10 mL) at room temperature was added EDCI·HCl (230 mg, 1.20 mmol), 4-dimethylaminopyridine (12.2 mg, 0.10 mmol) and TsNHNHBoc (**10**, 286 mg, 1.00 mmol). After 2 h, the resulting solution was quenched with saturated NH<sub>4</sub>Cl aq. (5 mL) and partitioned between EtOAc (20 mL) and H<sub>2</sub>O (5 mL). The organic phase was collected and the aqueous phase was extracted with EtOAc (20 mL) twice. The combined organic extract was washed with brine (10 mL) twice, dried over anhydrous Na<sub>2</sub>SO<sub>4</sub>, filtered and concentrated *in vacuo*. The residue was purified by flash column chromatography on silica gel (5% EtOAc in *n*-hexane) to afford **S2a** as a white powder (412 mg, 0.92 mmol, 92%).

*R*<sub>f</sub> = 0.65 (*n*-hexane/EtOAc = 1:1, UV, Ce-PMA); M.p. 156.2–156.7 °C; IR (neat, cm<sup>-1</sup>) 1732, 1716, 1370, 1281, 1172; <sup>1</sup>H NMR (CDCl<sub>3</sub>, 400 MHz) δ 8.05 (d, *J* = 8.7 Hz, 2H), 8.02 (br, 2H), 7.36 (d, *J* = 7.8 Hz, 2H), 7.15 (br, 1H), 3.93 (s, 3H), 2.46 (s, 3H), 1.34 (s, 9H); <sup>13</sup>C NMR (CDCl<sub>3</sub>, 100 MHz) δ 168.8, 153.6, 145.8, 134.2, 129.9, 129.4, 129.2, 128.0, 83.4, 52.4, 27.8, 21.8; HRMS calcd for C<sub>19</sub>H<sub>21</sub>IN<sub>2</sub>NaO<sub>5</sub>S ([M + Na<sup>+</sup>]) 471.1202, found 471.1180.

**Methyl 4-(1-tosylhydrazinecarbonyl)benzoate (S2b)**

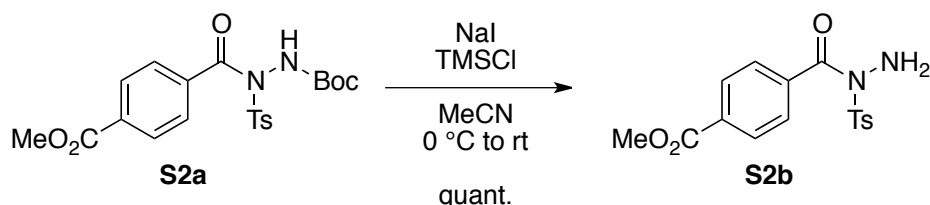

To a stirred solution of **S2a** (173 mg, 0.39 mmol) in MeCN (10 mL) at 0 °C was added NaI (174 mg, 1.16 mmol) and TMSCl (100 μL, 0.78 mmol) and the mixture was warmed to room temperature. After 30 min, the reaction was quenched with saturated NH<sub>4</sub>Cl aq. (5 mL) and partitioned between EtOAc (30 mL) and H<sub>2</sub>O (10 mL). The organic phase was collected and the aqueous phase was extracted with EtOAc (20 mL) twice. The combined organic extract was washed

with saturated  $\text{Na}_2\text{S}_2\text{O}_3$  aq. (20 mL) and brine (20 mL), dried over anhydrous  $\text{Na}_2\text{SO}_4$ , filtered and concentrated *in vacuo*. The residue was crystallized from toluene (3 mL) and *n*-hexane (20 mL) to afford **S2b** as a white powder (134 mg, 0.39 mmol, 100%).

$R_f = 0.59$  (*n*-hexane/EtOAc = 1:1, UV, Ce-PMA); M.p. 165.5–165.8 °C; IR (neat,  $\text{cm}^{-1}$ ) 1721, 1672, 1342, 1278, 1168;  $^1\text{H}$  NMR ( $\text{CDCl}_3$ , 400 MHz)  $\delta$  8.07 (d,  $J = 8.2$  Hz, 2H), 7.89 (d,  $J = 8.2$  Hz, 2H), 7.75 (d,  $J = 8.2$  Hz, 2H), 7.34 (d,  $J = 8.7$  Hz, 2H), 4.48 (s, 2H), 3.94 (s, 3H), 2.46 (s, 3H);  $^{13}\text{C}$  NMR ( $\text{CDCl}_3$ , 100 MHz)  $\delta$  170.3, 166.2, 145.6, 137.8, 133.6, 133.0, 129.7, 129.3, 129.1, 129.0, 52.4, 21.7; HRMS calcd for  $\text{C}_{16}\text{H}_{16}\text{N}_2\text{NaO}_5\text{S}$  ( $[\text{M} + \text{Na}^+]$ ) 371.0678, found 371.0660.

### Methyl 4-formylbenzoate (**S2c**)

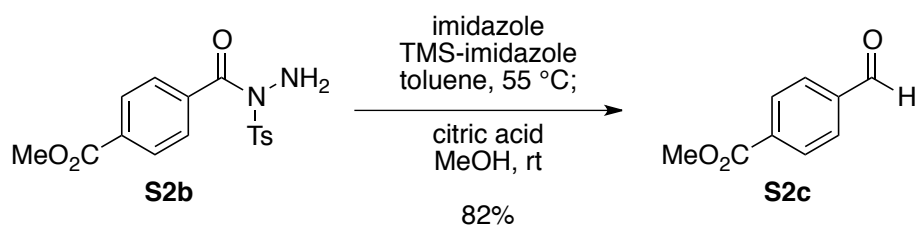

To a solution of **S2b** (100 mg, 0.29 mmol) in toluene (1.4 mL) at room temperature was added TMS-imidazole (85  $\mu\text{L}$ , 0.57 mmol). After stirring for 5 min, the reaction mixture was added imidazole (39 mg, 0.57 mmol) and stirring was continued at 55 °C. After 6 h, the reaction was added 1.0 M citric acid in MeOH (3.0 mL) at room temperature and stirred for 1 h. The resulting mixture was quenched with saturated  $\text{NaHCO}_3$  aq. (6 mL) and partitioned between EtOAc (10 mL) and  $\text{H}_2\text{O}$  (5 mL). The organic phase was collected and the aqueous phase was extracted with EtOAc (15 mL) twice. The combined organic layer was washed with brine, dried over anhydrous  $\text{Na}_2\text{SO}_4$ , filtered and concentrated *in vacuo*. The residue was purified by flash column chromatography on neutralized silica gel (10 to 20% EtOAc in *n*-hexane) to afford **S2c** as a white powder (38.6 mg, 0.24 mmol, 82%).

***tert*-Butyl 2-tosyl-2-(4-(trifluoromethyl)benzoyl)hydrazinecarboxylate (**S3a**)**

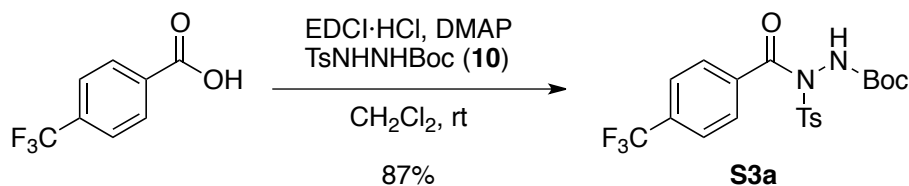

To a solution of 4-(trifluoromethyl)benzoic acid (190 mg, 1.00 mmol) in  $\text{CH}_2\text{Cl}_2$  (10 mL) at room temperature was added EDCI·HCl (230 mg, 1.20 mmol), 4-dimethylaminopyridine (12.2 mg, 0.10 mmol) and TsNHNHBoc (**10**, 286 mg, 1.00 mmol). After 2 h, the resulting solution was quenched with saturated  $\text{NH}_4\text{Cl}$  aq. (5 mL) and partitioned between EtOAc (20 mL) and  $\text{H}_2\text{O}$  (5 mL). The organic phase was collected and the aqueous phase was extracted with EtOAc (20 mL) twice. The combined organic extract was washed with brine (10 mL) twice, dried over anhydrous  $\text{Na}_2\text{SO}_4$ , filtered and concentrated *in vacuo*. The residue was purified by flash column chromatography on silica gel (10% EtOAc in *n*-hexane) to afford **S3a** as a white powder (400 mg, 0.87 mmol, 87%).

$R_f = 0.58$  (*n*-hexane/EtOAc = 2:1, UV, Ce-PMA); M.p. 145.6–146.1 °C; IR (neat,  $\text{cm}^{-1}$ ) 1740, 1731, 1713, 1371, 1325, 1171;  $^1\text{H}$  NMR ( $\text{CDCl}_3$ , 400 MHz)  $\delta$  8.04 (d,  $J = 8.2$  Hz, 2H), 7.67–7.62 (m, 4H), 7.36 (d,  $J = 8.3$  Hz, 2H), 7.15 (br, 1H), 2.46 (s, 3H), 1.34 (s, 9H);  $^{13}\text{C}$  NMR ( $\text{CDCl}_3$ , 100 MHz)  $\delta$  168.7, 145.9, 136.5, 134.1, 129.9, 129.4, 128.4, 125.0, 83.4, 27.7, 21.8; HRMS calcd for  $\text{C}_{21}\text{H}_{24}\text{N}_2\text{NaO}_7\text{S}$  ( $[\text{M} + \text{Na}^+]$ ) 481.1021, found 481.1003.

**4-Methyl-*N*-(4-(trifluoromethyl)benzoyl)benzenesulfonohydrazide (**S3b**)**

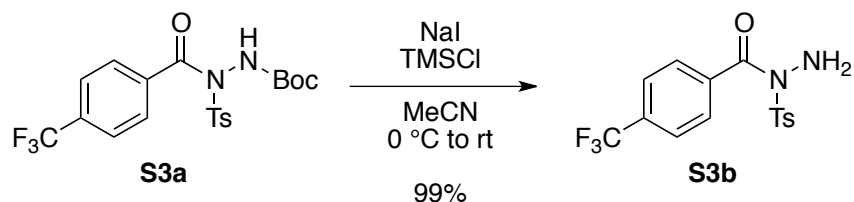

To a stirred solution of **S3a** (400 mg, 0.87 mmol) in MeCN (10 mL) at 0 °C was added NaI (392 mg, 2.62 mmol) and TMSCl (220  $\mu\text{L}$ , 1.75 mmol). The mixture was warmed to room temperature. After 30 min, the reaction was quenched with saturated  $\text{NH}_4\text{Cl}$  aq. (5 mL) and partitioned between EtOAc (40 mL) and  $\text{H}_2\text{O}$  (10 mL). The combined organic layer was washed with saturated  $\text{Na}_2\text{S}_2\text{O}_3$  aq. (20 mL) and brine (20 mL), dried over anhydrous  $\text{Na}_2\text{SO}_4$ , filtered and concentrated *in vacuo*. The residue was crystallized from toluene/*n*-hexane (3:20, 23 mL) to afford

**S3b** as a white powder (312 mg, 0.88 mmol, 99%).

$R_f = 0.52$  (*n*-hexane/EtOAc = 2:1, UV, Ce-PMA); M.p. 160.0–161.0 °C; IR (neat,  $\text{cm}^{-1}$ ) 1683, 1507, 1408, 1338;  $^1\text{H}$  NMR ( $\text{CDCl}_3$ , 400 MHz)  $\delta$  7.90 (d,  $J = 8.2$  Hz, 2H), 7.81 (d,  $J = 8.2$  Hz, 2H), 7.67 (d,  $J = 8.2$  Hz, 2H), 7.37 (d,  $J = 8.2$  Hz, 2H), 4.47 (s, 2H), 2.47 (s, 3H);  $^{13}\text{C}$  NMR ( $\text{CDCl}_3$ , 100 MHz)  $\delta$  169.8, 145.7, 137.2, 133.5, 129.7, 129.1, 124.9, 124.8, 124.7, 122.2, 21.7; HRMS calcd for  $\text{C}_{15}\text{H}_{13}\text{F}_3\text{N}_2\text{NaO}_3\text{S}$  ( $[\text{M} + \text{Na}^+]$ ) 381.0497, found 381.0512.

#### 4-(Trifluoromethyl)benzaldehyde (**S3c**)

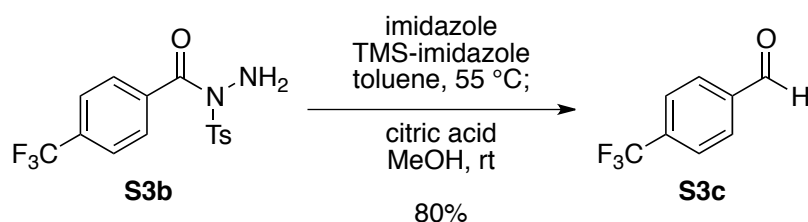

To a solution of **S3b** (200 mg, 0.56 mmol) in toluene (2.5 mL) at room temperature was added TMS-imidazole (160  $\mu\text{L}$ , 1.12 mmol). After stirring for 5 min, the reaction mixture was added imidazole (76 mg, 1.1 mmol) and stirring was continued at 55 °C. After 6 h, the reaction mixture was added 1.0 M citric acid in MeOH (5.0 mL) at room temperature and stirred for additional 1 h. The resulting mixture was partitioned between EtOAc (20 mL) and saturated  $\text{NaHCO}_3$  aq. (6 mL). The organic phase was collected and the aqueous phase was extracted with EtOAc (20 mL) twice. The combined organic extract was washed with brine, dried over anhydrous  $\text{Na}_2\text{SO}_4$ , filtered and concentrated *in vacuo*. The residue was purified by flash column chromatography on neutralized silica gel (2% EtOAc in *n*-hexane) to afford **S3c** as a white powder (77.9 mg, 0.45 mmol, 80%).

***tert*-Butyl 2-(4-cyanobenzoyl)-2-tosylhydrazinecarboxylate (**S4a**)**

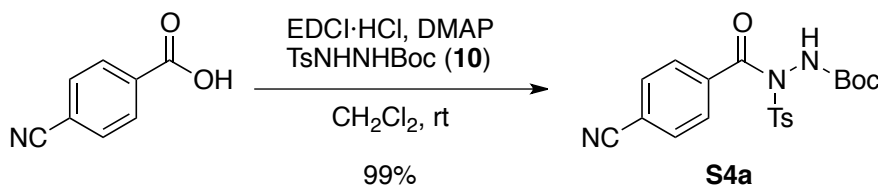

To a solution of 4-cyanobenzoic acid (190 mg, 1.00 mmol) in  $\text{CH}_2\text{Cl}_2$  (10 mL) at room temperature was added EDCI·HCl (230 mg, 1.20 mmol), 4-dimethylaminopyridine (12.2 mg, 0.10 mmol) and TsNHNHBoc (**10**, 286 mg, 1.00 mmol). After 2 h, the reaction was quenched with saturated  $\text{NH}_4\text{Cl}$  aq. (5 mL) and partitioned between EtOAc (20 mL) and  $\text{H}_2\text{O}$  (5 mL). The organic phase was collected and the aqueous phase was extracted with EtOAc (10 mL) twice. The combined organic extract was washed with brine (10 mL) twice, dried over anhydrous  $\text{Na}_2\text{SO}_4$ , filtered and concentrated *in vacuo*. The residue was purified by flash column chromatography on silica gel (10% EtOAc in *n*-hexane) to afford **S4a** as a white powder (415 mg, 0.99 mmol, 99%).

$R_f$  = 0.66 (*n*-hexane/EtOAc = 1:1, UV, Ce-PMA); M.p. 139.1–139.5 °C; IR (neat,  $\text{cm}^{-1}$ ) 2232, 1739, 1715, 1370, 1247, 1173;  $^1\text{H}$  NMR ( $\text{CDCl}_3$ , 400 MHz)  $\delta$  8.03 (d,  $J$  = 8.7 Hz, 2H), 7.66 (br, 4H), 7.36 (d,  $J$  = 8.3 Hz, 2H), 7.15 (br, 1H), 2.46 (s, 3H), 1.35 (s, 9H);  $^{13}\text{C}$  NMR ( $\text{CDCl}_3$ , 100 MHz)  $\delta$  168.2, 153.6, 137.2, 133.8, 131.7, 129.9, 129.4, 128.6, 117.8, 114.9, 83.4, 27.7, 21.7; HRMS calcd for  $\text{C}_{20}\text{H}_{21}\text{N}_3\text{NaO}_5\text{S}$  ( $[\text{M} + \text{Na}^+]$ ) 438.1100, found 438.1079.

***N*-(4-Cyanobenzoyl)-4-methylbenzenesulfonohydrazide (**S4b**)**

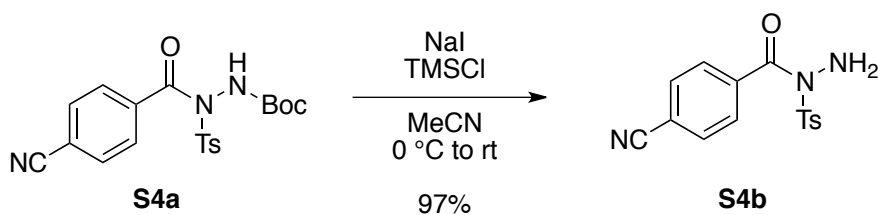

To a stirred solution of **S4a** (415 mg, 0.99 mmol) in MeCN (10 mL) at 0 °C was added NaI (450 mg, 3.00 mmol) and TMSCl (250  $\mu\text{L}$ , 2.00 mmol) and the mixture was warmed to room temperature. After 30 min, the solution was quenched with saturated  $\text{NH}_4\text{Cl}$  aq. (5 mL) and partitioned between EtOAc (40 mL) and  $\text{H}_2\text{O}$  (5 mL). The organic phase was collected and the aqueous phase was extracted with EtOAc (30 mL) twice. The combined organic extract was washed with saturated  $\text{Na}_2\text{S}_2\text{O}_3$  aq. (20 mL) and brine (20 mL), dried over anhydrous  $\text{Na}_2\text{SO}_4$ , filtered and



concentrated *in vacuo*. The residue was crystallized from toluene (10 mL) to afford **S4b** as a white powder (305 mg, 0.97 mmol, 97%).

$R_f = 0.57$  (*n*-hexane/EtOAc = 1:1, UV, Ce-PMA); M.p. 143.0–144.0 °C; IR (neat,  $\text{cm}^{-1}$ ) 2234, 1681, 1344, 1173;  $^1\text{H}$  NMR ( $\text{CDCl}_3$ , 400 MHz)  $\delta$  7.89 (d,  $J = 8.3$  Hz, 2H), 7.79 (d,  $J = 8.2$  Hz, 2H), 7.70 (d,  $J = 8.3$  Hz, 2H), 7.37 (d,  $J = 8.7$  Hz, 2H), 4.47 (s, 2H), 2.47 (s, 3H);  $^{13}\text{C}$  NMR ( $\text{CDCl}_3$ , 100 MHz)  $\delta$  169.3, 145.9, 137.8, 133.3, 131.6, 129.9, 129.8, 129.1, 117.9, 115.4, 21.7; HRMS calcd for  $\text{C}_{15}\text{H}_{13}\text{N}_3\text{NaO}_3\text{S}$  ( $[\text{M} + \text{Na}^+]$ ) 338.0575, found 338.0563.

#### 4-Formylbenzonitrile (**S4c**)

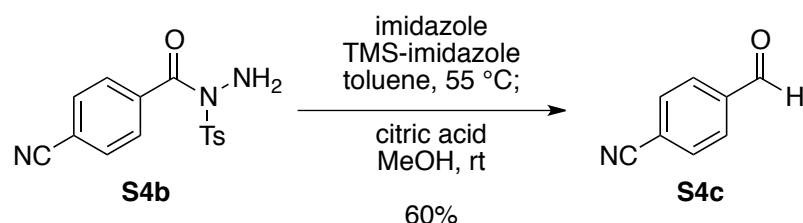

To a solution of **S4b** (100 mg, 0.32 mmol) in toluene (2.0 mL) at room temperature was added TMS-imidazole (95  $\mu\text{L}$ , 0.63 mmol). After stirring for 5 min, the reaction mixture was added imidazole (43.2 mg, 0.63 mmol) and stirring was continued at 55 °C. After 6 h, the reaction mixture was added 1 M citric acid in MeOH (3 mL) at room temperature and stirred for additional 1 h. The resulting mixture was partitioned between saturated  $\text{NaHCO}_3$  aq. (6 mL) and EtOAc (15 mL). The organic phase was collected and the aqueous phase was extracted with EtOAc (10 mL) twice. The combined organic extract was washed with brine, dried over anhydrous  $\text{Na}_2\text{SO}_4$ , filtered and concentrated *in vacuo*. The residue was purified by preparative TLC (30% EtOAc in *n*-hexane) to afford **S4c** as a white powder (25.1 mg, 0.19 mmol, 60%).

***tert*-Butyl 2-(4-methoxybenzoyl)-2-tosylhydrazinecarboxylate (**S5a**)**

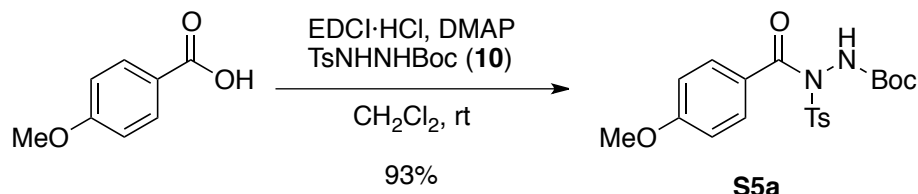

To a solution of 4-methoxybenzoic acid (152 mg, 1.00 mmol) in  $\text{CH}_2\text{Cl}_2$  (10 mL) at room temperature was added EDCI·HCl (230 mg, 1.20 mmol), 4-dimethylaminopyridine (12.2 mg, 0.10 mmol) and TsNHNHBoc (**10**, 286 mg, 1.00 mmol). After 8 h, the reaction was quenched with saturated  $\text{NH}_4\text{Cl}$  aq. (5 mL) and partitioned between EtOAc (20 mL) and  $\text{H}_2\text{O}$  (5 mL). The organic phase was collected and the aqueous phase was extracted with EtOAc (10 mL) twice. The combined organic extract was washed with brine (10 mL) twice, dried over anhydrous  $\text{Na}_2\text{SO}_4$ , filtered and concentrated *in vacuo*. The residue was purified by flash column chromatography on silica gel (10% EtOAc in toluene) to afford **S5a** as a white amorphous solid (390 mg, 0.93 mmol, 93%).

$R_f = 0.55$  (*n*-hexane/EtOAc = 1:1, UV, Ce-PMA); IR (neat,  $\text{cm}^{-1}$ ) 1734, 1698, 1604, 1508, 1368, 1258, 1169;  $^1\text{H}$  NMR ( $\text{CDCl}_3$ , 400 MHz)  $\delta$  8.04 (d,  $J = 8.2$  Hz, 2H), 7.64 (d,  $J = 8.7$  Hz, 2H), 7.34 (d,  $J = 8.2$  Hz, 2H), 7.07 (br, 1H), 6.86 (d,  $J = 8.7$  Hz, 2H), 3.83 (s, 3H), 2.45 (s, 3H), 1.35 (br, 9H);  $^{13}\text{C}$  NMR ( $\text{CDCl}_3$ , 100 MHz)  $\delta$  168.8, 162.6, 153.8, 145.2, 134.6, 131.0, 129.8, 129.3, 124.5, 82.7, 55.3, 27.7, 21.6; HRMS calcd for  $\text{C}_{19}\text{H}_{21}\text{N}_2\text{NaO}_5\text{S}$  ( $[\text{M} + \text{Na}^+]$ ) 443.1253, found 443.1247.

***N*-(4-Methoxybenzoyl)-4-methylbenzenesulfonohydrazide (**S5b**)**

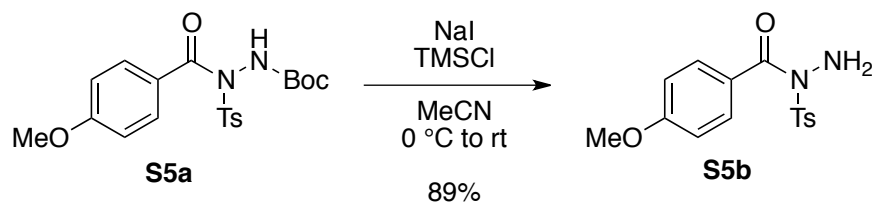

To a stirred solution of **S5a** (300 mg, 0.71 mmol) in MeCN (5.0 mL) at 0 °C was added NaI (320 mg, 2.14 mmol) and TMSCl (180  $\mu\text{L}$ , 1.42 mmol) and the resulting mixture was warmed to room temperature. After 30 min, the reaction was quenched with saturated  $\text{NH}_4\text{Cl}$  aq. (5 mL) and partitioned between EtOAc (30 mL) and  $\text{H}_2\text{O}$  (10 mL). The organic phase was collected and the aqueous phase was extracted with EtOAc (30 mL) twice. The combined organic extract was washed with saturated  $\text{Na}_2\text{S}_2\text{O}_3$  aq. (20 mL) and brine (20 mL), dried over anhydrous  $\text{Na}_2\text{SO}_4$ , filtered and

concentrated *in vacuo*. The residue was crystallized from toluene/*n*-hexane (3:10, 13 mL) to afford **S5b** as a white powder (203 mg, 0.64 mmol, 89%).

$R_f = 0.54$  (*n*-hexane/EtOAc = 1:1, UV, Ce-PMA); M.p. 115.6–115.9 °C; IR (neat,  $\text{cm}^{-1}$ ) 1683, 1603, 1507, 1352, 1257, 1165, 1025;  $^1\text{H}$  NMR ( $\text{CDCl}_3$ , 400 MHz)  $\delta$  7.84 (d,  $J = 8.2$  Hz, 2H), 7.82 (d,  $J = 8.7$  Hz, 2H), 7.34 (d,  $J = 8.2$  Hz, 2H), 6.92 (d,  $J = 8.7$  Hz, 2H), 4.43 (s, 2H), 3.87 (s, 3H), 2.45 (s, 3H);  $^{13}\text{C}$  NMR ( $\text{CDCl}_3$ , 100 MHz)  $\delta$  171.0, 163.3, 145.1, 133.5, 132.5, 129.5, 129.0, 125.4, 113.2, 55.4, 21.7; HRMS calcd for  $\text{C}_{14}\text{H}_{13}\text{IN}_2\text{NaO}_3\text{S}$  ( $[\text{M} + \text{Na}^+]$ ) 343.0729, found 343.0738.

#### 4-Methoxybenzaldehyde (**S5c**)

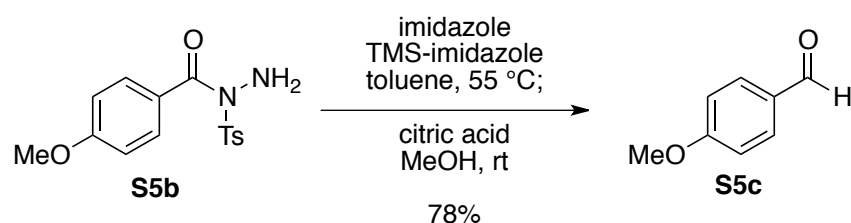

To a solution of **S5b** (100 mg, 0.31 mmol) in toluene (3.0 mL) at room temperature was added TMS-imidazole (120  $\mu\text{L}$ , 0.62 mmol). After stirring for 5 min, the reaction mixture was added imidazole (42.5 mg, 0.62 mmol) and stirring was continued at 55 °C. After 6 h, the reaction mixture was added 1.0 M citric acid in MeOH (5.0 mL) at room temperature and stirred for additional 1 h. The resulting mixture was partitioned between EtOAc (20 mL) and saturated  $\text{NaHCO}_3$  aq. (6 mL). The organic phase was collected and the aqueous phase was extracted with EtOAc (20 mL) twice. The combined organic extract was washed with brine, dried over anhydrous  $\text{Na}_2\text{SO}_4$ , filtered and concentrated *in vacuo*. The residue was purified by flash column chromatography on neutralized silica gel (5% EtOAc in *n*-hexane) to afford **S5c** as a white powder (33 mg, 0.24 mmol, 78%).

***tert*-Butyl 2-(4-nitrobenzoyl)-2-tosylhydrazinecarboxylate (**S6a**)**

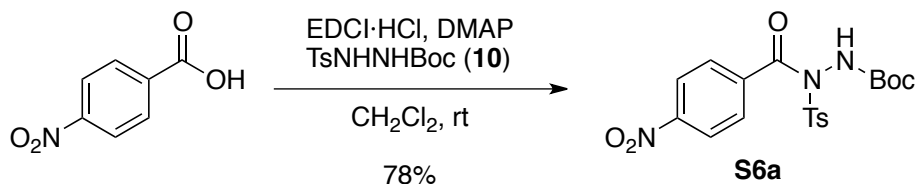

To a solution of 4-nitrobenzoic acid (167 mg, 1.00 mmol) in  $\text{CH}_2\text{Cl}_2$  (10 mL) at room temperature was added EDCI·HCl (230 mg, 1.20 mmol), 4-dimethylaminopyridine (12.2 mg, 0.10 mmol) and TsNHNHBoc (**10**, 286 mg, 1.00 mmol). After 8 h, the reaction was quenched with saturated  $\text{NH}_4\text{Cl}$  aq. (5 mL) and partitioned between EtOAc (20 mL) and  $\text{H}_2\text{O}$  (5 mL). The organic phase was collected and the aqueous phase was extracted with EtOAc (20 mL) twice. The combined organic extract was washed with brine (10 mL) twice, dried over anhydrous  $\text{Na}_2\text{SO}_4$ , filtered and concentrated *in vacuo*. The residue was purified by flash column chromatography on silica gel (EtOAc in *n*-hexane, 10-15%) to afford **S6a** as a white amorphous solid (341 mg, 0.78 mmol, 78%).

$R_f$  = 0.72 (*n*-hexane/EtOAc = 1:1, UV, Ce-PMA); IR (neat,  $\text{cm}^{-1}$ ) 1731, 1715, 1705, 1525, 1371, 1350, 1172;  $^1\text{H}$  NMR ( $\text{CDCl}_3$ , 400 MHz)  $\delta$  8.21 (d,  $J$  = 8.2 Hz, 2H), 8.04 (d,  $J$  = 8.7 Hz, 2H), 7.73 (d,  $J$  = 7.8 Hz, 2H), 7.38 (d,  $J$  = 7.8 Hz, 2H), 7.20 (br, 1H), 2.43 (s, 3H), 1.36 (s, 9H);  $^{13}\text{C}$  NMR ( $\text{CDCl}_3$ , 100 MHz)  $\delta$  167.8, 149.6, 149.4, 149.1, 145.9, 133.6, 129.7, 129.3, 128.8, 122.9, 83.4, 27.5, 21.6; HRMS calcd for  $\text{C}_{19}\text{H}_{21}\text{N}_2\text{NaO}_5\text{S}$  ( $[\text{M} + \text{Na}^+]$ ) 458.0998, found 458.0983.

**4-Methyl-*N*-(4-nitrobenzoyl)benzenesulfonohydrazide (**S6b**)**

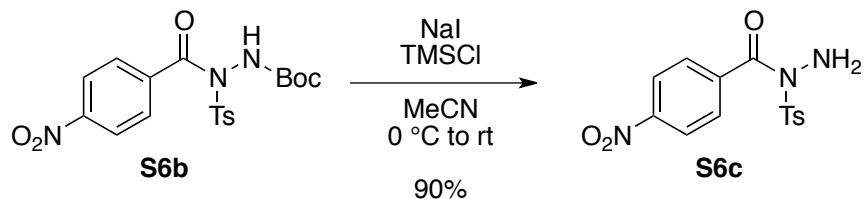

To a stirred solution of **S6a** (341 mg, 0.70 mmol) in MeCN (10 mL) at 0 °C was added NaI (350 mg, 2.35 mmol) and TMSCl (170  $\mu\text{L}$ , 1.57 mmol) and the mixture was warmed to room temperature. After 30 min, the reaction was quenched with saturated  $\text{NH}_4\text{Cl}$  aq. (5 mL) and partitioned between EtOAc (30 mL) and  $\text{H}_2\text{O}$  (10 mL). The organic phase was collected and the aqueous phase was extracted with EtOAc (10 mL) twice. The combined organic extract was washed with saturated  $\text{Na}_2\text{S}_2\text{O}_3$  aq. (20 mL) and brine (20 mL), dried over anhydrous  $\text{Na}_2\text{SO}_4$ , filtered and

concentrated *in vacuo*. The residue was crystallized from toluene/*n*-hexane (1:4, 25 mL) to afford **S6b** as a white powder (236 mg, 0.70 mmol, 90%).

$R_f = 0.61$  (*n*-hexane/EtOAc = 1:1, UV, Ce-PMA); M.p. 156.0–156.3 °C; IR (neat,  $\text{cm}^{-1}$ ) 1678, 1604, 1528, 1343, 1173;  $^1\text{H}$  NMR ( $\text{CDCl}_3$ , 400 MHz)  $\delta$  8.28 (d,  $J = 8.2$  Hz, 2H), 7.90 (d,  $J = 8.2$  Hz, 2H), 7.85 (d,  $J = 8.2$  Hz, 2H), 7.38 (d,  $J = 8.2$  Hz, 2H), 4.50 (s, 2H), 2.47 (s, 3H);  $^{13}\text{C}$  NMR ( $\text{CDCl}_3$ , 100 MHz)  $\delta$  168.9, 149.4, 145.9, 139.5, 133.3, 130.3, 129.8, 129.1, 122.9, 21.7; HRMS calcd for  $\text{C}_{14}\text{H}_{13}\text{IN}_2\text{NaO}_3\text{S}$  ( $[\text{M} + \text{Na}^+]$ ) 358.0474, found 358.0483.

***tert*-Butyl 2-(3-methoxybenzoyl)-2-tosylhydrazinecarboxylate (**S7a**)**

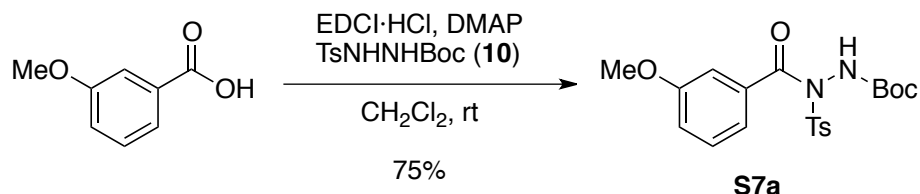

To a solution of 3-methoxybenzoic acid (154 mg, 1.01 mmol) in  $\text{CH}_2\text{Cl}_2$  (10 mL) at room temperature was added EDCI·HCl (230 mg, 1.20 mmol), 4-dimethylaminopyridine (12.2 mg, 0.10 mmol) and TsNHNHBoc (**10**, 286 mg, 1.00 mmol). After 2 h, the reaction was quenched with saturated  $\text{NH}_4\text{Cl}$  aq. (5 mL) and partitioned between EtOAc (20 mL) and  $\text{H}_2\text{O}$  (5 mL). The organic phase was collected and the aqueous phase was extracted with EtOAc (20 mL) twice. The combined organic extract was washed with brine (10 mL) twice, dried over anhydrous  $\text{Na}_2\text{SO}_4$ , filtered and concentrated *in vacuo*. The residue was purified by flash column chromatography on silica gel (10% EtOAc in *n*-hexane) to afford **S7a** as a white powder (314 mg, 0.75 mmol, 75%).

$R_f$  = 0.41 (*n*-hexane/EtOAc = 2:1, UV, Ce-PMA); M.p. 104.5–105.0 °C; IR (neat,  $\text{cm}^{-1}$ ) 1740, 1708, 1597, 1489, 1368, 1170;  $^1\text{H}$  NMR ( $\text{CDCl}_3$ , 400 MHz)  $\delta$  8.06 (d,  $J$  = 8.2 Hz, 2H), 7.35 (d,  $J$  = 8.3 Hz, 2H), 7.11 (s, 1H), 7.11 (br, 1H), 3.78 (s, 3H), 2.45 (s, 3H), 1.07 (s, 9H);  $^{13}\text{C}$  NMR ( $\text{CDCl}_3$ , 100 MHz)  $\delta$  184.6, 159.2, 145.5, 134.5, 129.9, 129.4, 129.1, 120.4, 118.4, 83.2, 55.4, 27.8, 21.7; HRMS calcd for  $\text{C}_{20}\text{H}_{24}\text{N}_2\text{NaO}_6\text{S}$  ( $[\text{M} + \text{Na}^+]$ ) 443.1253, found 443.1258.

***N*-(3-Methoxybenzoyl)-4-methylbenzenesulfonohydrazide (**S7b**)**

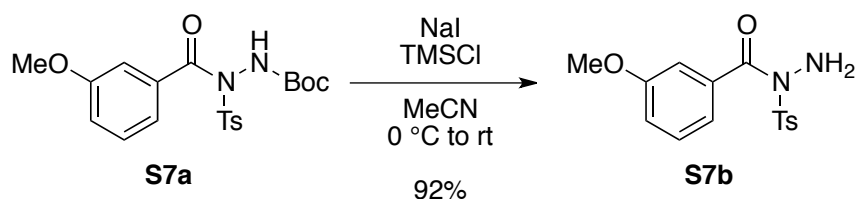

To a stirred solution of **S7a** (314 mg, 0.75 mmol) in MeCN (7.0 mL) at 0 °C was added NaI (336 mg, 2.24 mmol) and TMSCl (190  $\mu\text{L}$ , 1.49 mmol) and the reaction mixture was warmed to room temperature. After 30 min, the reaction was quenched with saturated aq.  $\text{NH}_4\text{Cl}$  (5 mL) and partitioned between EtOAc (30 mL) and  $\text{H}_2\text{O}$  (10 mL). The organic phase was collected and the aqueous phase was extracted with EtOAc (10 mL) twice. The combined organic extract was washed with saturated  $\text{Na}_2\text{S}_2\text{O}_3$  aq. (20 mL) and brine (20 mL), dried over anhydrous  $\text{Na}_2\text{SO}_4$ , filtered and concentrated *in vacuo*. The residue was crystallized from toluene/*n*-hexane (1:5, 18 mL) to afford

**S7b** as a white powder (220 mg, 0.69 mmol, 92%).

$R_f = 0.31$  (*n*-hexane/EtOAc = 2:1, UV, Ce-PMA); M.p. 110.0–111.0 °C; IR (neat,  $\text{cm}^{-1}$ ) 1683, 1597, 1354, 1290, 1165;  $^1\text{H}$  NMR ( $\text{CDCl}_3$ , 400 MHz)  $\delta$  7.89 (d,  $J = 8.2$  Hz, 2H), 7.36–7.32 (m, 5H), 7.24 (s, 1H), 4.45 (s, 2H), 3.83 (s, 3H), 2.45 (s, 3H);  $^{13}\text{C}$  NMR ( $\text{CDCl}_3$ , 100 MHz)  $\delta$  171.1, 159.0, 145.3, 134.9, 133.7, 129.6, 129.0, 128.8, 122.0, 118.4, 114.5, 55.4, 21.7; HRMS calcd for  $\text{C}_{15}\text{H}_{16}\text{N}_2\text{NaO}_4\text{S}$  ( $[\text{M} + \text{Na}^+]$ ) 343.0729, found 343.0744.

### 3-Methoxybenzaldehyde (**S7c**)

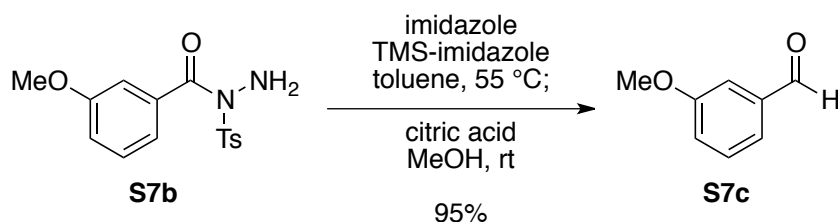

To a solution of **S7b** (160 mg, 0.50 mmol) in toluene (2.5 mL) at room temperature was added TMS-imidazole (150  $\mu\text{L}$ , 1.00 mmol). After stirring for 5 min, the reaction mixture was added imidazole (68 mg, 1.00 mmol) and stirring was continued at 55 °C. After 6 h, the reaction mixture was added 1 M citric acid in MeOH (5.0 mL) at room temperature and stirred for additional 1 h. The resulting mixture was partitioned between EtOAc (10 mL) and saturated  $\text{NaHCO}_3$  aq. (6 mL). The organic phase was collected and the aqueous phase was extracted with EtOAc (10 mL) twice. The combined organic extract was washed with brine, dried over anhydrous  $\text{Na}_2\text{SO}_4$ , filtered and concentrated *in vacuo*. The residue was purified by flash column chromatography on neutralized silica gel (3% EtOAc in *n*-hexane) to afford **S7c** as a white powder (65.0 mg, 0.48 mmol, 95%).

***tert*-Butyl 2-(3-nitrobenzoyl)-2-tosylhydrazinecarboxylate (**S8a**)**

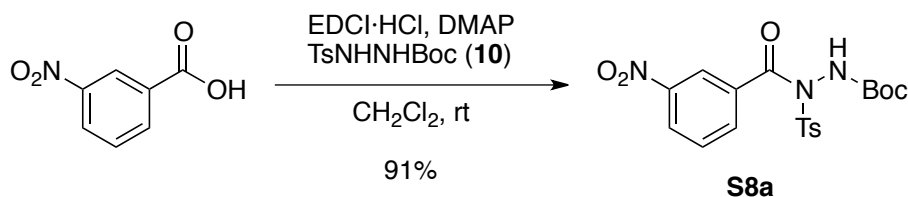

To a solution of 3-nitrobenzoic acid (167 mg, 1.00 mmol) in CH<sub>2</sub>Cl<sub>2</sub> (10 mL) at room temperature was added EDCI·HCl (230 mg, 1.20 mmol), 4-dimethylaminopyridine (12.2 mg, 0.10 mmol) and TsNHNHBoc (**10**, 286 mg, 1.00 mmol). After 2 h, the reaction was quenched with saturated NH<sub>4</sub>Cl aq. (5 mL) and partitioned between EtOAc (20 mL) and H<sub>2</sub>O (5 mL). The organic phase was collected and the aqueous phase was extracted with EtOAc (20 mL) twice. The combined organic extract was washed with brine (10 mL) twice, dried over anhydrous Na<sub>2</sub>SO<sub>4</sub>, filtered and concentrated *in vacuo*. The residue was purified by flash column chromatography on silica gel (EtOAc in *n*-hexane, 10 to 15%) to afford **S8a** as a white powder (398 mg, 0.91 mmol, 91%).

R<sub>f</sub> = 0.73 (*n*-hexane/EtOAc = 1:1, UV, Ce-PMA); M.p. 150.0–151.0 °C; IR (neat, cm<sup>-1</sup>) 1742, 1715, 1538, 1352, 1247, 1173; <sup>1</sup>H NMR (CDCl<sub>3</sub>, 400 MHz) δ 8.46 (s, 1H), 8.33 (d, *J* = 7.8 Hz, 1H), 8.05 (d, *J* = 8.2 Hz, 2H), 7.93 (d, *J* = 7.8 Hz, 1H), 7.58 (br, 1H), 7.38 (d, *J* = 7.8 Hz, 2H), 2.47 (s, 3H), 1.37 (s, 9H); <sup>13</sup>C NMR (CDCl<sub>3</sub>, 100 MHz) δ 157.4, 153.7, 147.6, 146.1, 134.7, 134.1, 133.9, 130.0, 129.5, 129.3, 126.2, 123.2, 83.7, 27.8, 21.8; HRMS calcd for C<sub>19</sub>H<sub>21</sub>N<sub>3</sub>NaO<sub>7</sub>S ([M + Na<sup>+</sup>]) 458.0998, found 458.1007.

**4-Methyl-*N*-(3-nitrobenzoyl)benzenesulfonhydrazide (**S8b**)**

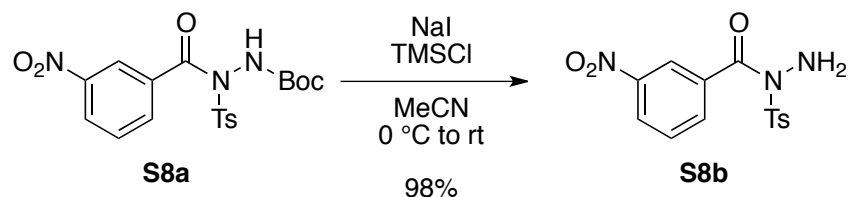

To a stirred solution of **S8a** (397 mg, 0.91 mmol) in MeCN (10 mL) at 0 °C was added NaI (410 mg, 2.74 mmol) and TMSCl (230 μL, 1.83 mmol) and the reaction mixture was warmed to room temperature. After 30 min, the resulting solution was quenched with saturated NH<sub>4</sub>Cl aq. (5 mL) and partitioned between EtOAc (40 mL) and H<sub>2</sub>O (10 mL). The organic phase was collected and the aqueous phase was extracted with EtOAc (10 mL) twice. The combined organic extract was



washed with saturated  $\text{Na}_2\text{S}_2\text{O}_3$  aq. (20 mL) and brine (20 mL), dried over anhydrous  $\text{Na}_2\text{SO}_4$ , filtered and concentrated *in vacuo*. The residue was crystallized from toluene/*n*-hexane (1:4, 25 mL) to afford **S8b** as a white powder (286 mg, 0.89 mmol, 98%).

$R_f$  = 0.63 (*n*-hexane/EtOAc = 1:1, UV, Ce-PMA); M.p. 162.0–162.5 °C; IR (neat,  $\text{cm}^{-1}$ ) 1682, 1530, 1351, 1169;  $^1\text{H}$  NMR ( $\text{CDCl}_3$ , 400 MHz)  $\delta$  8.58 (s, 1H), 8.36 (d,  $J$  = 8.3 Hz, 1H), 8.06 (d,  $J$  = 7.8 Hz, 1H), 7.93 (d,  $J$  = 8.2 Hz, 2H), 7.62 (dd,  $J$  = 8.3, 7.8 Hz, 1H), 7.39 (d,  $J$  = 7.8 Hz, 2H), 4.53 (s, 2H), 2.48 (s, 3H);  $^{13}\text{C}$  NMR ( $\text{CDCl}_3$ , 100 MHz)  $\delta$  168.5, 147.6, 146.0, 135.3, 135.2, 133.3, 129.8, 129.2, 129.0, 126.4, 124.6, 21.7; HRMS calcd for  $\text{C}_{14}\text{H}_{13}\text{N}_3\text{NaO}_5\text{S}$  ( $[\text{M} + \text{Na}^+]$ ) 358.0474, found 358.0483.

### 3-Nitrobenzaldehyde (**S8c**)

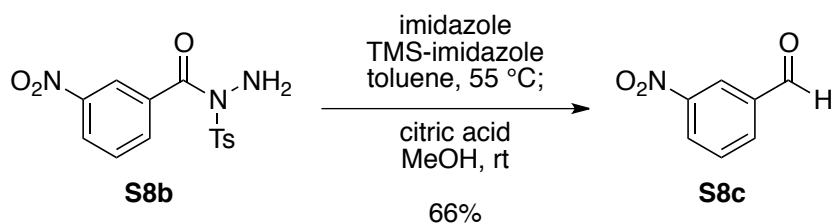

To a solution of **S8b** (100 mg, 0.31 mmol) in toluene (1.5 mL) at room temperature was added TMS-imidazole (90  $\mu\text{L}$ , 0.62 mmol). After stirring for 5 min, the reaction mixture was added imidazole (42.5 mg, 0.62 mmol) and stirring was continued at 55 °C. After 6 h, the reaction mixture was added 1.0 M citric acid in MeOH (3 mL) at room temperature and stirred for additional 1 h. The resulting mixture was partitioned between EtOAc (10 mL) and saturated  $\text{NaHCO}_3$  aq. (6 mL). The organic phase was collected and the aqueous phase was extracted with EtOAc (10 mL) twice. The combined organic extract was washed with brine, dried over anhydrous  $\text{Na}_2\text{SO}_4$ , filtered and concentrated *in vacuo*. The residue was purified by flash column chromatography on neutralized silica gel (EtOAc in *n*-hexane, 10-20%) to afford **S8c** as a white powder (31.0 mg, 0.21 mmol, 66%).

***tert*-Butyl-2-(3-(4,4,5,5-tetramethyl-1,3,2-dioxaborolan-2-yl)benzoyl)-2-tosylhydrazinecarboxylate (**S9a**)**

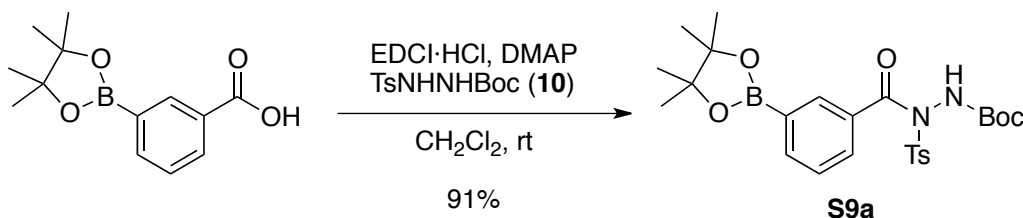

To a solution of 3-(4,4,5,5-tetramethyl-1,3,2-dioxaborolan-2-yl)benzoic acid (250 mg, 1.01 mmol) in  $\text{CH}_2\text{Cl}_2$  (10 mL) at room temperature was added EDCI·HCl (230 mg, 1.20 mmol), 4-dimethylaminopyridine (12.2 mg, 0.10 mmol) and TsNHNHBoc (**10**, 286 mg, 1.00 mmol). After 2 h, the resulting solution was quenched with saturated  $\text{NH}_4\text{Cl}$  aq. (5 mL) and partitioned between EtOAc (20 mL) and  $\text{H}_2\text{O}$  (5 mL). The organic phase was collected and the aqueous phase was extracted with EtOAc (20 mL) twice. The combined organic extract was washed with brine (10 mL) twice, dried over anhydrous  $\text{Na}_2\text{SO}_4$ , filtered and concentrated *in vacuo*. The residue was crystallized from toluene/*n*-hexane (1:2, 9 mL) to afford **S9a** as a white powder (468 mg, 0.91 mmol, 91%).

$R_f$  = 0.52 (*n*-hexane/EtOAc = 2:1, UV, Ce-PMA); M.p. 140.2–140.8 °C; IR (neat,  $\text{cm}^{-1}$ ) 1741, 1716, 1600, 1361, 1243, 1171;  $^1\text{H}$  NMR ( $\text{CDCl}_3$ , 400 MHz)  $\delta$  8.06 (d,  $J$  = 8.3 Hz, 2H), 8.00 (s, 1H), 7.89 (d,  $J$  = 7.3 Hz, 1H), 7.67 (d,  $J$  = 7.3 Hz, 1H), 7.36–7.34 (m, 3H), 7.12 (br, 1H), 2.45 (s, 3H), 1.54 (s, 21H);  $^{13}\text{C}$  NMR ( $\text{CDCl}_3$ , 100 MHz)  $\delta$  169.5, 153.3, 145.4, 145.3, 138.0, 134.6, 132.4, 131.1, 129.9, 129.8, 129.3, 127.5, 84.1, 27.8, 24.8, 21.7; HRMS calcd for  $\text{C}_{25}\text{H}_{33}\text{BN}_2\text{NaO}_7\text{S}$  ( $[\text{M} + \text{Na}^+]$ ) 539.1999, found 539.1990.

**4-Methyl-*N*-(3-(4,4,5,5-tetramethyl-1,3,2-dioxaborolan-2-yl)benzoyl)benzenesulfonohydrazide (**S9b**)**

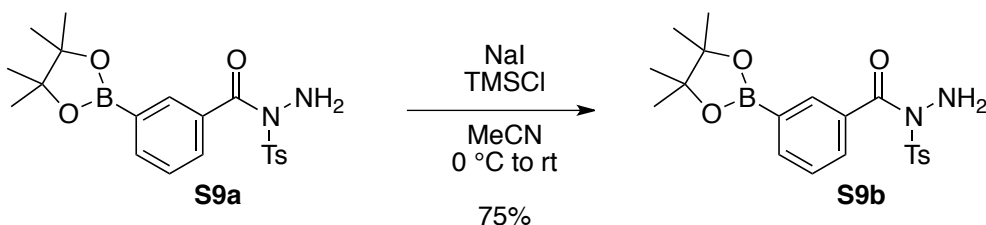

To a stirred solution of **S9a** (410 mg, 0.79 mmol) in MeCN (5.0 mL) at 0 °C was added NaI (357 mg, 2.38 mmol) and TMSCl (200  $\mu\text{L}$ , 1.59 mmol) and the resulting mixture was warmed to room temperature. After 30 min, the reaction was quenched with saturated  $\text{NH}_4\text{Cl}$  aq. (5 mL) and

partitioned between EtOAc (40 mL) and H<sub>2</sub>O (20 mL). The organic phase was collected and the aqueous phase was extracted with EtOAc (30 mL) twice. The combined organic extract was washed with saturated Na<sub>2</sub>S<sub>2</sub>O<sub>3</sub> aq. (20 mL) and brine (20 mL), dried over anhydrous Na<sub>2</sub>SO<sub>4</sub>, filtered and concentrated *in vacuo*. The residue was crystallized from toluene/*n*-hexane (1:3, 20 mL) to afford **S9b** as a white powder (248 mg, 0.60 mmol, 75%).

*R*<sub>f</sub> = 0.45 (*n*-hexane/EtOAc = 2:1, UV, Ce-PMA); M.p. 147.1–148.0 °C; IR (neat, cm<sup>-1</sup>) 1687, 1602, 1360, 1323, 1168, 1143; <sup>1</sup>H NMR (CDCl<sub>3</sub>, 400 MHz) δ 8.14 (s, 1H), 7.95 (d, *J* = 7.4 Hz, 1H), 7.91 (d, *J* = 8.2 Hz, 2H), 7.80 (d, *J* = 7.8 Hz, 1H), 7.42 (dd, *J* = 7.8, 7.4 Hz, 1H), 7.35 (d, *J* = 8.2 Hz, 2H), 4.46 (s, 2H), 2.46 (s, 3H), 1.35 (s, 12H); <sup>13</sup>C NMR (CDCl<sub>3</sub>, 100 MHz) δ 171.3, 145.3, 138.5, 135.6, 133.8, 133.2, 132.3, 129.6, 129.1, 127.2, 84.2, 24.8, 21.7; HRMS calcd for C<sub>20</sub>H<sub>25</sub>BN<sub>2</sub>NaO<sub>5</sub>S ([*M* + Na<sup>+</sup>]) 439.1475, found 439.1482.

### 3-(4,4,5,5-Tetramethyl-1,3,2-dioxaborolan-2-yl)benzaldehyde (**S9c**)

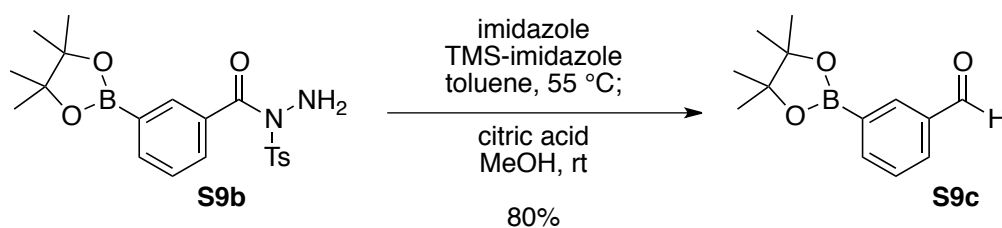

To a solution of **S9b** (150 mg, 0.36 mmol) in toluene (2.0 mL) at room temperature was added TMS-imidazole (100 μL, 0.72 mmol). After stirring for 5 min, the reaction mixture was added imidazole (49.0 mg, 0.72 mmol), and stirring was continued at 55 °C. After 12 h, the reaction mixture was added 1.0 M citric acid in H<sub>2</sub>O (4.0 mL) at room temperature and stirred for additional 2 h. The resulting mixture was partitioned between EtOAc (20 mL) and saturated NaHCO<sub>3</sub> aq. (10 mL). The organic phase was collected and the aqueous phase was extracted with EtOAc (10 mL) twice. The combined organic extract was washed with brine, dried over anhydrous Na<sub>2</sub>SO<sub>4</sub>, filtered and concentrated *in vacuo*. The residue was purified by flash column chromatography on neutralized silica gel (10 to 20% EtOAc in *n*-hexane) to afford **S9c** as a colorless oil (66.0 mg, 0.28 mmol, 80%).

*R*<sub>f</sub> = 0.63 (*n*-hexane/EtOAc = 1:1, UV, Ce-PMA, 2,4-DNP); IR (neat, cm<sup>-1</sup>) 2970, 2880, 1710, 1605, 1460, 1361, 1194, 1144; <sup>1</sup>H NMR (CDCl<sub>3</sub>, 400 MHz) δ 10.1 (s, 1H), 8.31 (s, 1H), 8.06 (d, *J* = 7.8 Hz, 1H), 8.00 (d, *J* = 7.8 Hz, 1H), 7.54 (t, *J* = 7.8 Hz, 1H), 1.37 (s, 12H); <sup>13</sup>C NMR (CDCl<sub>3</sub>, 100 MHz) δ 192.6, 140.7, 137.2, 135.8, 131.3, 128.4, 84.3, 24.9; HRMS calcd for C<sub>13</sub>H<sub>17</sub>BNaO<sub>3</sub> ([*M* + Na<sup>+</sup>]) 255.1168, found 255.1158.

**tert-Butyl-2-(1-ethyl-7-methyl-4-oxo-1,4-dihydro-1,8-naphthyridine-3-carbonyl)-2-tosylhydrazinecarboxylate (S10a)**

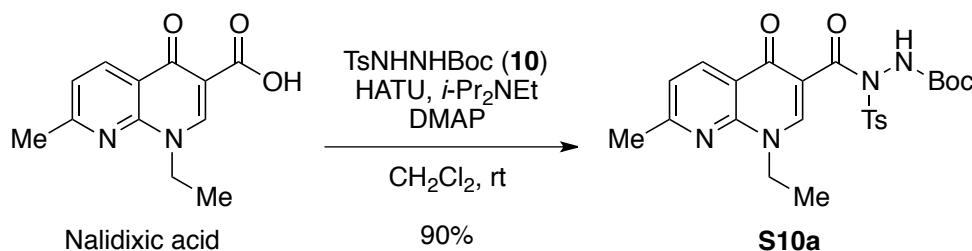

To a solution of Nalidixic acid (255 mg, 1.10 mmol) in  $\text{CH}_2\text{Cl}_2$  (10 mL) at room temperature was added HATU (456 mg, 1.20 mmol), 4-dimethylaminopyridine (24.4 mg, 0.20 mmol),  $i\text{-Pr}_2\text{NEt}$  (260  $\mu\text{L}$ , 1.50 mmol), and TsNHNHBoc (**10**, 286 mg, 1.00 mmol). After 2 h, the reaction was quenched with saturated  $\text{NH}_4\text{Cl}$  aq. (3 mL) and partitioned between EtOAc (25 mL) and  $\text{H}_2\text{O}$  (5 mL). The organic phase was collected and the aqueous phase was extracted with EtOAc (20 mL) twice. The combined organic extract was washed with brine (10 mL) twice, dried over anhydrous  $\text{Na}_2\text{SO}_4$ , filtered and concentrated *in vacuo*. The residue was purified by flash column chromatography on neutralized silica gel (10 to 40% EtOAc in *n*-hexane) to afford **S10a** as a white powder (547 mg, 0.99 mmol, 90%).

$R_f = 0.47$  (*n*-hexane/EtOAc = 1:1, UV, Ce-PMA); M.p. 112.0–113.0  $^\circ\text{C}$ ; IR (neat,  $\text{cm}^{-1}$ ) 1732, 1683, 1622, 1541, 1507, 1444, 1369;  $^1\text{H}$  NMR ( $\text{CDCl}_3$ , 400 MHz)  $\delta$  8.62 (d,  $J = 8.3$  Hz, 1H), 8.47 (s, 1H), 8.21 (s, 1H), 8.06 (d,  $J = 8.2$  Hz, 2H), 7.33 (d,  $J = 8.3$  Hz, 2H), 7.29 (d,  $J = 8.2$  Hz, 1H), 4.49 (qd,  $J = 13.3, 7.3$  Hz, 1H), 4.35 (qd,  $J = 13.3, 7.3$  Hz, 1H), 2.68 (s, 3H), 2.43 (s, 3H), 1.40 (t,  $J = 7.3$  Hz, 3H), 1.18 (s, 9H);  $^{13}\text{C}$  NMR ( $\text{CDCl}_3$ , 100 MHz)  $\delta$  173.7, 167.5, 163.5, 154.4, 144.9, 136.5, 135.4, 129.7, 129.2, 121.6, 120.5, 116.3, 81.9, 46.8, 27.8, 25.2, 21.7, 15.1; HRMS calcd for  $\text{C}_{24}\text{H}_{28}\text{N}_4\text{NaO}_6\text{S}$  ( $[\text{M} + \text{Na}^+]$ ) 523.1627, found 523.1635.

**N-(1-Ethyl-7-methyl-4-oxo-1,4-dihydro-1,8-naphthyridine-3-carbonyl)-4-methylbenzenesulfonylhydrazide (S10b)**

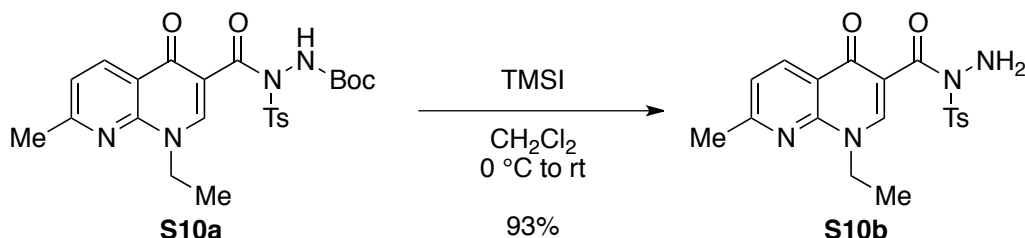

To a solution of **S10a** (200 mg, 0.40 mmol) in  $\text{CH}_2\text{Cl}_2$  (200  $\mu\text{L}$ ) at 0  $^\circ\text{C}$  was added 1.0 M TMSI in  $\text{CH}_2\text{Cl}_2$  (800  $\mu\text{L}$ ) and the resulting mixture was warmed to room temperature. After 5 min,

the reaction was quenched with saturated  $\text{NH}_4\text{Cl}$  aq. (2 mL) and partitioned between EtOAc (15 mL) and  $\text{H}_2\text{O}$  (10 mL). The organic phase was collected and the aqueous phase was extracted with EtOAc (10 mL) twice. The combined organic extract was washed with saturated  $\text{Na}_2\text{S}_2\text{O}_3$  aq. (5 mL) and brine (5 mL), dried over anhydrous  $\text{Na}_2\text{SO}_4$ , filtered and concentrated *in vacuo*. The residue was purified by flash column chromatography on neutralized silica gel (50% EtOAc in *n*-hexane) to afford **S10b** as a white powder (148 mg, 0.37 mmol, 93%).

$R_f$  = 0.23 (*n*-hexane/EtOAc = 1:1, UV, Ce-PMA); M.p. 180.0–183.5 °C (decomp.); IR (neat,  $\text{cm}^{-1}$ ) 1669, 1623, 1587, 1442, 1350, 1258, 1163;  $^1\text{H}$  NMR ( $\text{CDCl}_3$ , 400 MHz)  $\delta$  8.55 (d,  $J$  = 7.8 Hz, 1H), 8.12 (s, 1H), 8.00 (d,  $J$  = 8.2 Hz, 2H), 7.34 (d,  $J$  = 8.2 Hz, 2H), 7.24 (d,  $J$  = 8.2 Hz, 1H), 4.91 (br, 2H), 4.45 (q,  $J$  = 7.3 Hz, 2H), 2.66 (s, 3H), 2.42 (s, 3H), 1.45 (t,  $J$  = 8.2 Hz, 3H);  $^{13}\text{C}$  NMR ( $\text{CDCl}_3$ , 100 MHz)  $\delta$  174.1, 168.3, 163.0, 148.6, 145.7, 145.0, 136.4, 134.5, 129.5, 129.0, 121.1, 120.3, 118.1, 46.5, 25.1, 21.7, 15.1; HRMS calcd for  $\text{C}_{19}\text{H}_{20}\text{N}_4\text{NaO}_4\text{S}$  ( $[\text{M} + \text{Na}^+]$ ) 423.1103, found 423.1101.

#### 1-Ethyl-7-methyl-4-oxo-1,4-dihydro-1,8-naphthyridine-3-carbaldehyde (**S10c**)

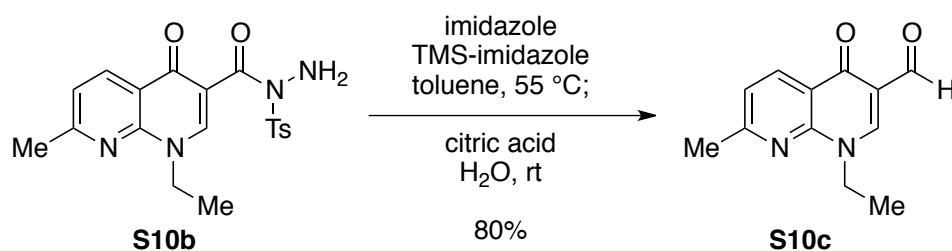

To a solution of **S10b** (100 mg, 0.25 mmol) in toluene (500  $\mu\text{L}$ ) at room temperature was added TMS-imidazole (110  $\mu\text{L}$ , 0.75 mmol). After stirring for 5 min, the reaction mixture was added imidazole (34.0 mg, 0.50 mmol), and stirring was continued at 55 °C. After 20 h, the reaction mixture was added 1.0 M citric acid aq. (5.0 mL) at room temperature and stirred for additional 2 h. The resulting mixture was partitioned between EtOAc (20 mL) and saturated  $\text{NaHCO}_3$  aq. (6 mL). The organic phase was collected and the aqueous phase was extracted with EtOAc (20 mL) twice. The combined organic extract was washed with brine, dried over anhydrous  $\text{Na}_2\text{SO}_4$ , filtered and concentrated *in vacuo*. The residue was purified by flash column chromatography on neutralized silica gel (ethyl acetate in *n*-hexane, 25 to 50%) to afford **S10c** as a white powder (43.0 mg, 0.20 mmol, 80%).

$R_f$  = 0.33 (*n*-hexane/EtOAc = 1:1, UV, Ce-PMA, 2,4-DNP); M.p. 176.0–177.0 °C; IR (neat,  $\text{cm}^{-1}$ ) 1681, 1625, 1607, 1542, 1442;  $^1\text{H}$  NMR ( $\text{CDCl}_3$ , 400 MHz)  $\delta$  10.4 (s, 1H), 8.65 (d,  $J$  = 8.2 Hz, 1H), 8.45 (s, 1H), 7.29 (d,  $J$  = 8.2 Hz, 1H), 4.50 (q,  $J$  = 6.9 Hz, 2H), 2.69 (s, 3H), 1.51 (t,  $J$  = 6.9 Hz, 3H);  $^{13}\text{C}$  NMR ( $\text{CDCl}_3$ , 100 MHz)  $\delta$  189.0, 177.2, 163.3, 149.1, 145.8, 136.2, 121.9, 121.5, 118.0, 46.8, 25.1, 15.1; HRMS calcd for  $\text{C}_{12}\text{H}_{12}\text{N}_2\text{NaO}_2$  ( $[\text{M} + \text{Na}^+]$ ) 239.0796, found 239.0793.

***tert*-Butyl 2-(5-bromothiophene-2-carbonyl)-2-tosylhydrazinecarboxylate (**S11a**)**

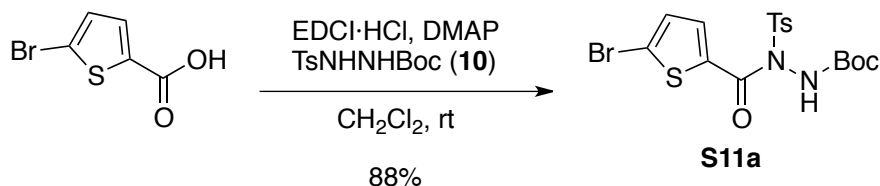

To a solution of 5-bromothiophene-2-carboxylic acid (228 mg, 1.10 mmol) in  $\text{CH}_2\text{Cl}_2$  (10 mL) at room temperature was added EDCI·HCl (230 mg, 1.20 mmol), 4-dimethylaminopyridine (12.2 mg, 0.10 mmol) and TsNHNHBoc (**10**, 286 mg, 1.00 mmol). After 2 h, the reaction was quenched with saturated  $\text{NH}_4\text{Cl}$  aq. (5 mL) and partitioned between EtOAc (20 mL) and  $\text{H}_2\text{O}$  (5 mL). The organic phase was collected and the aqueous phase was extracted with EtOAc (10 mL) twice. The combined organic extract was washed with brine (10 mL) twice, dried over anhydrous  $\text{Na}_2\text{SO}_4$ , filtered and concentrated *in vacuo*. The residue was purified by flash column chromatography on silica gel (15% EtOAc in *n*-hexane) to afford **S10a** as a white powder (419 mg, 0.88 mmol, 88%).

$R_f = 0.57$  (*n*-hexane/EtOAc = 2:1, UV, Ce-PMA); M.p. 170.0–171.0 °C; IR (neat,  $\text{cm}^{-1}$ ) 1749, 1674, 1408, 1368, 1346, 1246, 1171;  $^1\text{H}$  NMR ( $\text{CDCl}_3$ , 400 MHz)  $\delta$  8.05 (d,  $J = 8.2$  Hz, 2H), 7.73 (d,  $J = 4.1$  Hz, 1H), 7.35 (d,  $J = 8.2$  Hz, 2H), 7.23 (s, 1H), 7.06 (d,  $J = 4.1$  Hz, 1H), 2.44 (s, 3H), 1.41 (s, 9H);  $^{13}\text{C}$  NMR ( $\text{CDCl}_3$ , 100 MHz)  $\delta$  159.8, 154.1, 145.7, 137.3, 134.6, 131.8, 130.3, 130.1, 129.3, 123.1, 84.3, 28.1, 21.8; HRMS calcd for  $\text{C}_{17}\text{H}_{19}\text{BrN}_2\text{NaO}_5\text{S}_2$  ( $[\text{M} + \text{Na}^+]$ ) 496.9819, found 439.9817.

***N*-(5-Bromothiophene-2-carbonyl)-4-methylbenzenesulfonohydrazide (**S11b**)**

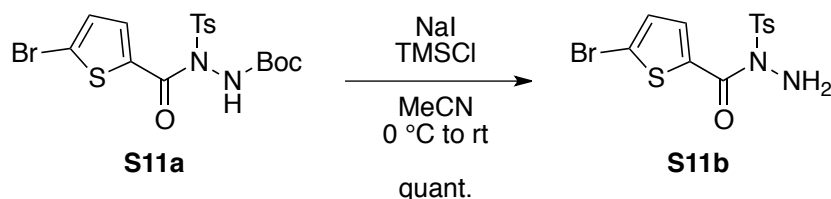

To a stirred solution of **S10a** (404 mg, 0.85 mmol) in MeCN (10 mL) at 0 °C was added NaI (382 mg, 2.55 mmol) and TMSCl (210  $\mu\text{L}$ , 1.70 mmol) and the resulting mixture was warmed to room temperature. After 30 min, the reaction was quenched with saturated  $\text{NH}_4\text{Cl}$  aq. (10 mL) and partitioned between EtOAc (40 mL) and  $\text{H}_2\text{O}$  (20 mL). The organic phase was collected and the aqueous phase was extracted with EtOAc (40 mL) twice. The combined organic extract was washed

with saturated  $\text{Na}_2\text{S}_2\text{O}_3$  aq. (20 mL) and brine (20 mL), dried over anhydrous  $\text{Na}_2\text{SO}_4$ , filtered and concentrated *in vacuo*. The residue was crystallized with toluene/*n*-hexane (2:1, 15 mL) to afford **S10b** as a white powder (340 mg, 0.85 mmol, quant.).

$R_f$  = 0.51 (*n*-hexane/EtOAc = 2:1, UV, Ce-PMA); M.p. 183.1–184.0 °C; IR (neat,  $\text{cm}^{-1}$ ) 1646, 1541, 1507, 1405, 1339;  $^1\text{H}$  NMR ( $\text{CDCl}_3$ , 400 MHz)  $\delta$  7.96 (d,  $J$  = 8.2 Hz, 2H), 7.81 (d,  $J$  = 4.1 Hz, 1H), 7.36 (d,  $J$  = 8.2 Hz, 2H), 7.06 (d,  $J$  = 4.1 Hz, 1H), 4.73 (s, 3H), 2.44 (s, 3H);  $^{13}\text{C}$  NMR ( $\text{CDCl}_3$ , 100 MHz)  $\delta$  160.4, 145.8, 137.3, 134.6, 129.7, 129.6, 129.1, 126.2, 124.7, 21.7; HRMS calcd for  $\text{C}_{12}\text{H}_{11}\text{BrN}_2\text{NaO}_3\text{S}_2$  ( $[\text{M} + \text{Na}^+]$ ) 396.9292, found 396.9295.

### 5-Bromothiophene-2-carbaldehyde (S11c)

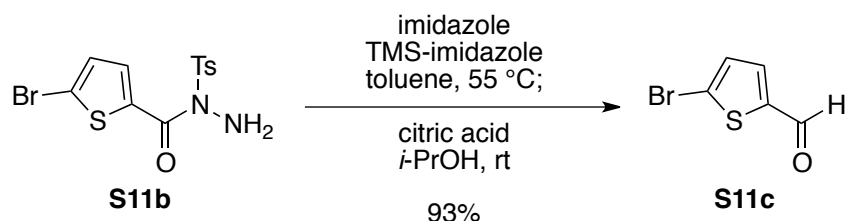

To a solution of **S10b** (200 mg, 0.53 mmol) in toluene (2.5 mL) at room temperature was added TMS-imidazole (155  $\mu\text{L}$ , 1.06 mmol). After stirring for 5 min, the reaction mixture was added imidazole (73.0 mg, 1.06 mmol), and stirring was continued at 55 °C. After 15 h, the reaction mixture was added 0.5 M citric acid in *i*-PrOH (6.0 mL) at room temperature and stirred for additional 2 h. The resulting mixture was partitioned between EtOAc (20 mL) and saturated  $\text{NaHCO}_3$  aq. (10 mL). The organic phase was collected and the aqueous phase was extracted with EtOAc (20 mL) twice. The combined organic extract was washed with brine, dried over anhydrous  $\text{Na}_2\text{SO}_4$ , filtered and concentrated *in vacuo*. The residue was purified by flash column chromatography on neutralized silica gel (10 to 20% EtOAc in *n*-hexane) to afford **S10c** as a pale yellow oil (95.0 mg, 0.50 mmol, 93%).

$R_f$  = 0.64 (*n*-hexane/EtOAc = 2:1, UV, Ce-PMA, 2,4-DNP); IR (neat,  $\text{cm}^{-1}$ ) 1518, 1410, 1202, 982, 860;  $^1\text{H}$  NMR ( $\text{CDCl}_3$ , 400 MHz)  $\delta$  9.78 (s, 1H), 7.52 (d,  $J$  = 4.1 Hz, 1H), 7.20 (d,  $J$  = 4.1 Hz, 1H);  $^{13}\text{C}$  NMR ( $\text{CDCl}_3$ , 100 MHz)  $\delta$  181.7, 145.2, 136.5, 131.4, 125.0; HRMS calcd for  $\text{C}_5\text{H}_3\text{BrOS}$  ( $[\text{M}^+]$ ) 189.9088, found 189.9083.



***N*-(3-(4-Methoxyphenyl)propanoyl)-4-methylbenzenesulfonohydrazide (**19**)**

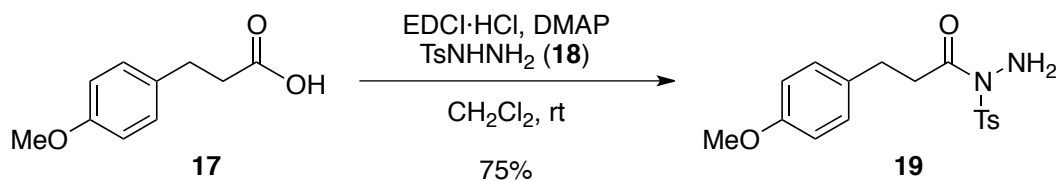

To a solution of 3-(4-methoxyphenyl)propanoic acid (**17**, 180 mg, 1.00 mmol) in  $\text{CH}_2\text{Cl}_2$  (10 mL) at room temperature was added EDCI·HCl (230 mg, 1.20 mmol), 4-dimethylaminopyridine (24.4 mg, 0.20 mmol) and  $\text{TsNHNH}_2$  (216 mg, 1.20 mmol). After 3 h, the reaction was quenched with saturated  $\text{NH}_4\text{Cl}$  aq. (5 mL) and partitioned between EtOAc (40 mL) and  $\text{H}_2\text{O}$  (10 mL). The organic phase was collected and the aqueous phase was extracted with EtOAc (40 mL) twice. The combined organic extract was washed with brine (20 mL) twice, dried over anhydrous  $\text{Na}_2\text{SO}_4$ , filtered and concentrated *in vacuo*. The residue was purified by flash column chromatography on silica gel (20% EtOAc in *n*-hexane) to afford **19** as a white powder (260 mg, 0.75 mmol, 75%).

$R_f$  = 0.63 (*n*-hexane/EtOAc = 1:1, UV, Ce-PMA); M.p. 113.8–114.0 °C; IR (neat,  $\text{cm}^{-1}$ ) 2933, 1702, 1611, 1512, 1443, 1350, 1300, 1248, 1166, 1122, 1089, 1034;  $^1\text{H}$  NMR ( $\text{CDCl}_3$ , 400 MHz)  $\delta$  7.85 (d,  $J$  = 8.2 Hz, 2H), 7.33 (d,  $J$  = 8.2 Hz, 2H), 7.05 (d,  $J$  = 8.2 Hz, 2H), 6.78 (d,  $J$  = 8.2 Hz, 2H), 4.27 (s, 2H), 3.78 (s, 3H), 3.02 (t,  $J$  = 7.8 Hz, 2H), 2.85 (t,  $J$  = 7.8 Hz, 2H), 2.45 (s, 3H);  $^{13}\text{C}$  NMR ( $\text{CDCl}_3$ , 100 MHz)  $\delta$  173.8, 158.0, 145.2, 134.7, 132.5, 129.5, 129.3, 128.7, 113.8, 55.2, 37.6, 29.7, 21.7; HRMS calcd for  $\text{C}_{16}\text{H}_{17}\text{N}_3\text{NaO}_6\text{S}$  ( $[\text{M} + \text{Na}^+]$ ) 371.1042, found 371.1029.

***N*-(3-(4-Methoxyphenyl)propanoyl)-2-nitrobenzenesulfonohydrazide (**22**)**

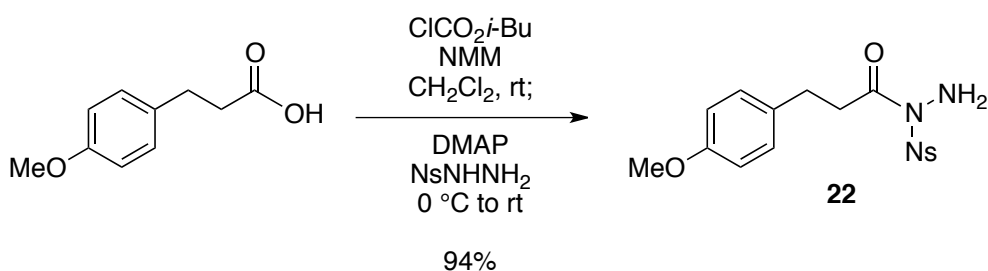

To a stirred solution of 3-(4-methoxyphenyl)propanoic acid (**17**, 180 mg, 1.00 mmol) in  $\text{CH}_2\text{Cl}_2$  (10 mL) at room temperature was added *N*-methylmorpholine (120  $\mu\text{L}$ , 1.10 mmol) and *i*-BuOCOCl (145  $\mu\text{L}$ , 1.10 mmol). After stirring for 1 h, the resulting solution was added 4-dimethylaminopyridine (24.4 mg, 0.20 mmol) and *o*-NsNHNH $_2$  (260 mg, 1.20 mmol) at 0 °C. The reaction mixture was warmed to room temperature and stirred for additional 2 h. The resulting solution was quenched with saturated  $\text{NH}_4\text{Cl}$  aq. (5 mL) and partitioned between EtOAc (30 mL)



and H<sub>2</sub>O (10 mL). The organic phase was collected and the aqueous phase was extracted with EtOAc (30 mL) twice. The combined organic extract was washed with brine (15 mL) twice, dried over anhydrous Na<sub>2</sub>SO<sub>4</sub>, filtered and concentrated *in vacuo*. The residue was purified by flash column chromatography on silica gel (10 to 20% EtOAc in *n*-hexane) to afford **22** as a white powder (455 mg, 0.94 mmol, 94%).

*R*<sub>f</sub> = 0.62 (*n*-hexane/EtOAc = 1:1, UV, Ce-PMA); M.p. 100.1–100.5 °C; IR (neat, cm<sup>-1</sup>) 1716, 1699, 1541, 1509, 1362; <sup>1</sup>H NMR (CDCl<sub>3</sub>, 400 MHz) δ 8.50–8.48 (m, 1H), 7.85–7.79 (m, 3H), 7.05 (d, *J* = 8.2 Hz, 2H), 6.77 (d, *J* = 8.3 Hz, 2H), 4.62 (s, 2H), 3.77 (s, 3H), 3.01 (t, *J* = 8.3 Hz, 2H), 2.82 (t, *J* = 8.3 Hz, 2H); <sup>13</sup>C NMR (CDCl<sub>3</sub>, 100 MHz) δ 174.6, 158.0, 135.4, 134.7, 132.9, 132.5, 132.2, 129.2, 124.6, 113.9, 55.2, 36.9, 29.2; HRMS calcd for C<sub>16</sub>H<sub>17</sub>N<sub>3</sub>NaO<sub>6</sub>S ([M + Na<sup>+</sup>]) 402.0736, found 403.0725.

### 3-(4-Methoxyphenyl)propanal (**20**)

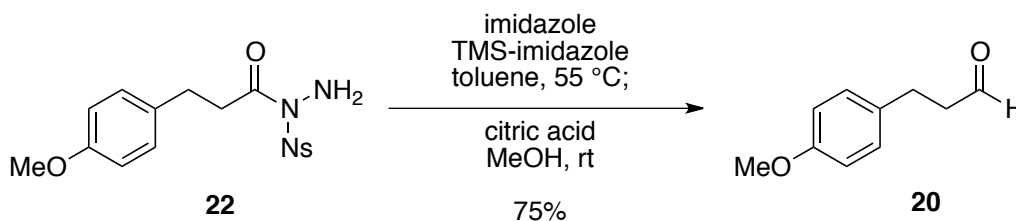

To a solution of **22** (200 mg, 0.53 mmol) in toluene (2.5 mL) at room temperature was added TMS-imidazole (155 μL, 1.05 mmol). After stirring for 5 min, the reaction mixture was added imidazole (72 mg, 1.05 mmol) and stirring was continued at 55 °C. After 10 h, the reaction mixture was added 1.0 M citric acid in MeOH (5.0 mL) at room temperature and stirred for additional 1 h. The resulting mixture was partitioned between EtOAc (10 mL) and saturated NaHCO<sub>3</sub> aq. (5 mL). The organic phase was collected and the aqueous phase was extracted with EtOAc (10 mL) twice. The combined organic extract was washed with brine, dried over anhydrous Na<sub>2</sub>SO<sub>4</sub>, filtered and concentrated *in vacuo*. The residue was purified by flash column chromatography on neutralized silica gel (6% EtOAc in *n*-hexane) to afford **20** as a colorless oil (65.0 mg, 0.40 mmol, 75%).

*R*<sub>f</sub> = 0.60 (*n*-hexane/EtOAc = 2:1, UV, Ce-PMA, 2,4-DNP); IR (neat, cm<sup>-1</sup>) 1722, 1514, 1247; <sup>1</sup>H NMR (CDCl<sub>3</sub>, 400 MHz) δ 9.81 (s, 1H), 7.11 (d, *J* = 6.4 Hz, 2H), 6.83 (d, *J* = 6.4 Hz, 2H), 3.78 (s, 3H), 2.90 (t, *J* = 7.3 Hz, 2H), 2.75 (t, *J* = 7.3 Hz, 2H); <sup>13</sup>C NMR (CDCl<sub>3</sub>, 100 MHz) δ 201.8, 158.1, 132.3, 129.2, 114.0, 55.3, 45.5, 27.3; HRMS calcd for C<sub>10</sub>H<sub>12</sub>O<sub>2</sub> ([M + H<sup>+</sup>]) 164.0837, found 164.0842.

***N*-((1*r*,4*r*)-4-*tert*-butylcyclohexanecarbonyl)-2-nitrobenzenesulfonohydrazide (**S12a**)**

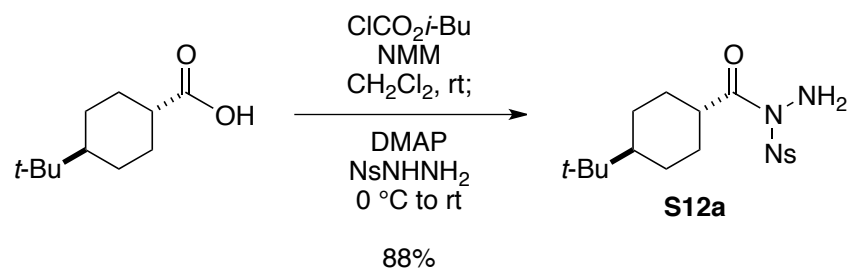

To a stirred solution of 4-*tert*-butylcyclohexanecarboxylic acid (184 mg, 1.00 mmol) in  $\text{CH}_2\text{Cl}_2$  (10 mL) at room temperature was added *N*-methylmorpholine (120  $\mu\text{L}$ , 1.10 mmol) and *i*-BuOCOC*i*-Bu (145  $\mu\text{L}$ , 1.10 mmol). After 1 h, the reaction mixture was added 4-dimethylaminopyridine (24.4 mg, 0.20 mmol) and *o*-NsNHNH<sub>2</sub> (260 mg, 1.20 mmol) at 0 °C. The reaction mixture was warmed to room temperature and stirred for additional 2 h. The reaction was quenched with saturated  $\text{NH}_4\text{Cl}$  aq. (5 mL) and partitioned between EtOAc (30 mL) and  $\text{H}_2\text{O}$  (10 mL). The organic phase was collected and the aqueous phase was extracted with EtOAc (30 mL) twice. The combined organic extract was washed with brine (10 mL) twice, dried over anhydrous  $\text{Na}_2\text{SO}_4$ , filtered and concentrated *in vacuo*. The residue was purified by flash column chromatography on silica gel (15% EtOAc in *n*-hexane) to afford **S12a** as a white powder (338 mg, 0.88 mmol, 88%).

$R_f$  = 0.56 (*n*-hexane/EtOAc = 2:1, UV, Ce-PMA); M.p. 100.1–100.5 °C; IR (neat,  $\text{cm}^{-1}$ ) 2946, 1698, 1541, 1362;  $^1\text{H}$  NMR ( $\text{CDCl}_3$ , 400 MHz)  $\delta$  8.49 (d,  $J$  = 5.5 Hz, 1H), 7.83–7.75 (m, 3H), 4.64 (s, 1H), 3.07 (tt,  $J$  = 11.9, 3.6 Hz, 1H), 1.93 (d,  $J$  = 11.5 Hz, 2H), 1.82 (d,  $J$  = 10.5 Hz, 2H), 1.34–1.25 (dt,  $J$  = 22.5, 10.1 Hz, 2H), 1.10–0.92 (m, 3H), 0.83 (s, 9H);  $^{13}\text{C}$  NMR ( $\text{CDCl}_3$ , 100 MHz)  $\delta$  178.1, 135.3, 134.6, 133.4, 132.6, 124.6, 47.3, 42.9, 42.2, 32.4, 28.6, 27.5, 26.4; HRMS calcd for  $\text{C}_{17}\text{H}_{25}\text{N}_3\text{NaO}_5\text{S}$  ( $[\text{M} + \text{Na}^+]$ ) 406.1413, found 406.1400.

**(1*r*,4*r*)-4-*tert*-Butylcyclohexanecarbaldehyde (**S12b**)**

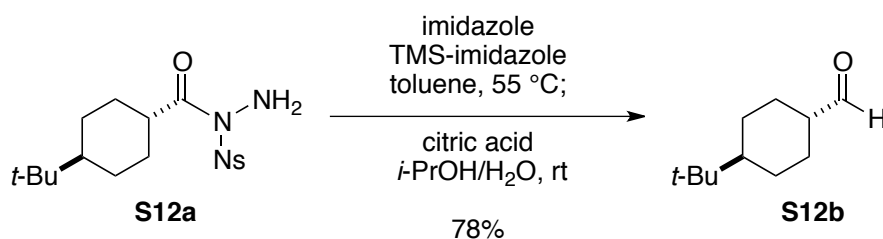

To a solution of **S12a** (200 mg, 0.52 mmol) in toluene (2.5 mL) at room temperature was

added TMS-imidazole (150  $\mu$ L, 1.04 mmol). After stirring for 5 min, the reaction mixture was added imidazole (71 mg, 1.0 mmol) and stirring was continued at 55 °C. After 14 h, the reaction mixture was added 0.5 M citric acid in *i*-PrOH (10 mL) at room temperature and stirred for additional 2 h. The resulting mixture was partitioned between saturated EtOAc (10 mL) and NaHCO<sub>3</sub> aq. (6 mL). The combined organic extract was washed with brine, dried over anhydrous Na<sub>2</sub>SO<sub>4</sub>, filtered and concentrated *in vacuo*. The residue was purified by flash column chromatography on neutralized silica gel (2% EtOAc in *n*-hexane) to afford **S12b** as a colorless oil (68.0 mg, 0.40 mmol, 78%).

$R_f$  = 0.67 (*n*-hexane/EtOAc = 2:1, 2,4-DNP); IR (neat, cm<sup>-1</sup>) 1722, 1514, 1247; <sup>1</sup>H NMR (CDCl<sub>3</sub>, 400 MHz)  $\delta$  9.61 (d,  $J$  = 1.8 Hz, 1H), 2.20–2.08 (m, 1H), 2.08–1.99 (m, 2H), 1.85–1.98 (m, 2H), 1.32–1.14 (m, 2H), 1.11–0.94 (m, 3H), 0.86 (s, 9H); <sup>13</sup>C NMR (CDCl<sub>3</sub>, 100 MHz)  $\delta$  205.1, 50.5, 47.6, 27.5, 27.4, 26.5, 26.2; HRMS calcd for C<sub>11</sub>H<sub>20</sub>O ([M<sup>+</sup>]) 168.1514, found 168.1521.

***trans*-2-nitro-*N*-(2-Phenylcyclopropanecarbonyl)benzenesulfonohydrazide (**S13a**)**

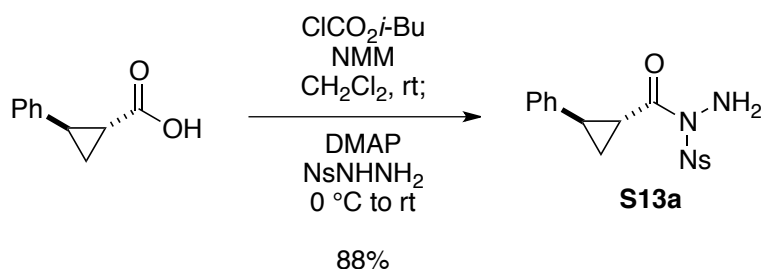

To a stirred solution of 2-phenylcyclopropanecarboxylic acid (162 mg, 1.00 mmol) in  $\text{CH}_2\text{Cl}_2$  (10 mL) at room temperature was added *N*-methylmorpholine (120  $\mu\text{L}$ , 1.10 mmol) and *i*-BuOCOC1 (145  $\mu\text{L}$ , 1.10 mmol). After 1 h, the resulting solution was added 4-dimethylaminopyridine (24.4 mg, 0.20 mmol) and *o*-NsNHNH<sub>2</sub> (260 mg, 1.20 mmol) at 0  $^\circ\text{C}$ . The reaction mixture was warmed to room temperature and stirred for additional 3.5 h. The reaction was quenched with saturated  $\text{NH}_4\text{Cl}$  aq. (5 mL) and partitioned between EtOAc (30 mL) and  $\text{H}_2\text{O}$  (10 mL). The organic phase was collected and the aqueous phase was extracted with EtOAc (30 mL) twice. The combined organic extract was washed with brine (10 mL) twice, dried over anhydrous  $\text{Na}_2\text{SO}_4$ , filtered and concentrated *in vacuo*. The residue was purified by flash column chromatography on silica gel (15% EtOAc in *n*-hexane) to afford **S13a** as a white powder (338 mg, 0.88 mmol, 88%).

$R_f = 0.67$  (*n*-hexane/EtOAc = 1:1, UV, Ce-PMA); M.p. 134.1–134.8  $^\circ\text{C}$ ; IR (neat,  $\text{cm}^{-1}$ ) 1697, 1683, 1541, 1362, 1173, 1129;  $^1\text{H}$  NMR ( $\text{CDCl}_3$ , 400 MHz)  $\delta$  8.48 (d,  $J = 5.0$  Hz, 1H), 7.85–7.79 (m, 3H), 7.30–7.19 (m, 3H), 7.12 (d,  $J = 3.6$  Hz, 2H), 4.74 (s, 2H), 3.09–3.05 (m, 1H), 2.52–2.48 (m, 1H), 1.62–1.57 (m, 1H), 1.43–1.38 (m, 1H);  $^{13}\text{C}$  NMR ( $\text{CDCl}_3$ , 100 MHz)  $\delta$  174.1, 139.6, 135.1, 134.7, 133.2, 132.5, 128.5, 126.7, 126.3, 124.6, 28.2, 23.3, 18.3; HRMS calcd for  $\text{C}_{16}\text{H}_{15}\text{N}_3\text{NaO}_5\text{S}$  ( $[\text{M} + \text{Na}^+]$ ) 384.0630, found 384.0642.

***trans*-2-Phenylcyclopropanecarbaldehyde (**S13b**)**

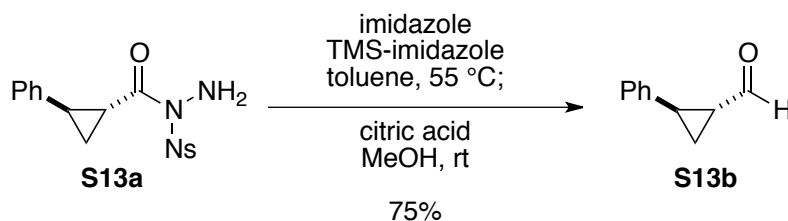

To a solution of **S13a** (200 mg, 0.55 mmol) in toluene (2.5 mL) at room temperature was

added TMS-imidazole (160  $\mu$ L, 1.11 mmol). After stirring for 5 min, the reaction mixture was added imidazole (75 mg, 1.1 mmol) and stirring was continued at 55 °C. After 16 h, the reaction mixture was added 1.0 M citric acid in MeOH (5.0 mL) at room temperature and stirred for additional 1 h. The resulting mixture was partitioned between saturated NaHCO<sub>3</sub> aq. (6 mL) and EtOAc (15 mL). The organic phase was collected and the aqueous phase was extracted with EtOAc (15 mL) twice. The combined organic extract was washed with brine, dried over anhydrous Na<sub>2</sub>SO<sub>4</sub>, filtered and concentrated *in vacuo*. The residue was purified by flash column chromatography on neutralized silica gel (3% EtOAc in *n*-hexane) to afford **S13b** as a colorless oil (60.8 mg, 0.42 mmol, 75%).

R<sub>f</sub> = 0.63 (*n*-hexane/EtOAc = 2:1, UV, 2,4-DNP); IR (neat, cm<sup>-1</sup>) 3023, 1708, 1128; <sup>1</sup>H NMR (CDCl<sub>3</sub>, 400 MHz)  $\delta$  9.33 (d, *J* = 4.6 Hz, 1H), 7.11–7.33 (m, 5H), 2.61–2.66 (m, 1H), 2.15–2.21 (m, 1H), 1.71–1.76 (m, 1H), 1.51–1.56 (m, 1H); <sup>13</sup>C NMR (CDCl<sub>3</sub>, 100 MHz)  $\delta$  199.7, 138.9, 128.6, 126.8, 126.3, 33.8, 26.6, 16.4; HRMS calcd for C<sub>10</sub>H<sub>10</sub>O ([M<sup>+</sup>]) 146.0732, found 146.0727.

***N*-((1*S*,2*S*,4*aR*,4*bS*,7*S*,9*aS*,10*S*,10*aR*)-2,7-dihydroxy-1-methyl-8-methylene-13-oxo-1,2,4*b*,5,6,7,8,9,10,10*a*-decahydro-4*a*,1-(epoxymethano)-7,9*a*-methanobenzo[*a*]azulene-10-carbonyl)-2-nitrobenzenesulfonohydrazide (**S14a**)**

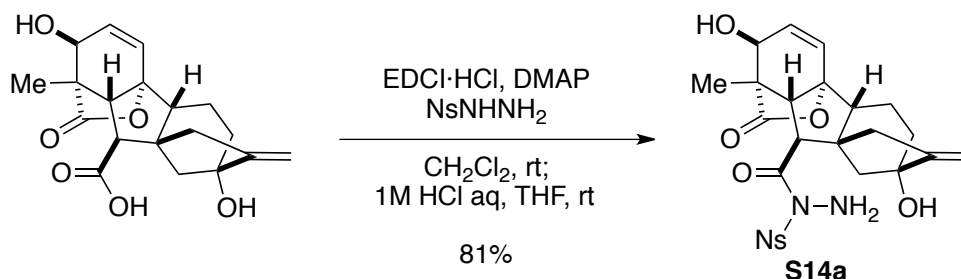

To a solution of gibberellic acid (355 mg, 1.02 mmol) in CH<sub>2</sub>Cl<sub>2</sub> (10 mL) at room temperature was added EDCI·HCl (288 mg, 1.50 mmol), 4-dimethylaminopyridine (24.4 mg, 0.20 mmol) and *o*-NsNHNH<sub>2</sub> (217 mg, 1.00 mmol). After 2 h, the reaction mixture was added 1.0 M HCl aq. (5.0 mL) and THF (5.0 mL) and stirred for additional 1 h. The resulting mixture was partitioned between EtOAc (30 mL) and saturated NaHCO<sub>3</sub> aq. (10 mL). The organic phase was collected and the aqueous phase was extracted with EtOAc (30 mL) twice. The combined organic extract was washed with brine, dried over anhydrous Na<sub>2</sub>SO<sub>4</sub>, filtered and concentrated *in vacuo*. The residue was purified by flash column chromatography on silica gel (50 to 60% EtOAc in *n*-hexane) to afford **S14a** (449 mg, 0.82 mmol, 81%) as a white powder.

*R*<sub>f</sub> = 0.38 (*n*-hexane/EtOAc = 1:2, UV, Ce-PMA); M.p. 192.0–193.0 °C (decomp.); IR (neat, cm<sup>-1</sup>) 3377, 1762, 1701, 1543, 1364, 1173; <sup>1</sup>H NMR (CDCl<sub>3</sub>, 400 MHz) δ 8.48 (m, 1H), 7.85 (m, 3H), 6.28 (d, *J* = 9.6 Hz, 1H), 5.87–5.84 (m, 1H), 5.20 (s, 1H), 4.83–4.77 (m, 3H), 4.07 (d, *J* = 3.2 Hz, 1H), 3.95 (d, *J* = 10.6 Hz, 1H), 3.15 (d, *J* = 10.1 Hz, 1H), 2.15 (d, *J* = 11.0 Hz, 1H), 2.06–1.65 (m, 8H), 1.05 (s, 3H); <sup>13</sup>C NMR (CDCl<sub>3</sub>, 100 MHz) δ 178.3, 173.9, 156.4, 147.7, 135.5, 135.1, 132.8, 132.7, 132.6, 132.4, 124.5, 107.4, 90.4, 78.3, 69.8, 53.5, 53.2, 51.6, 51.5, 47.8, 45.1, 42.9, 37.9, 17.0, 14.3; HRMS calcd for C<sub>25</sub>H<sub>27</sub>N<sub>3</sub>NaO<sub>9</sub>S ([M + Na<sup>+</sup>]) 568.1366, found 568.1389.

**(1S,2S,4aR,4bS,7S,9aS,10S,10aR)-2,7-dihydroxy-1-methyl-8-methylene-13-oxo-1,2,4b,5,6,7,8,9,10,10a-decahydro-4a,1-(epoxymethano)-7,9a-methanobenzo[*a*]azulene-10-carbaldehyde (S14b)**

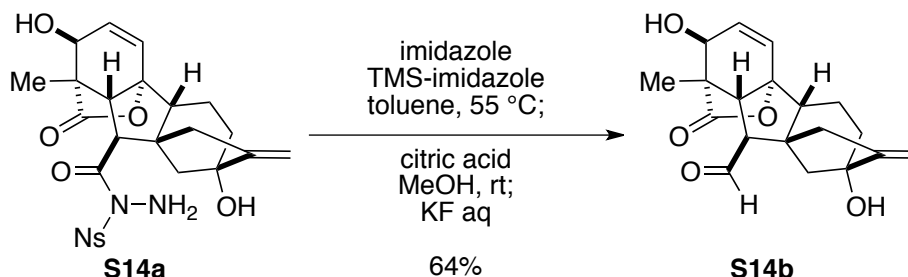

To a solution of **S14a** (300 mg, 0.55 mmol) in toluene (3.5 mL) at room temperature was added TMS-imidazole (400  $\mu\text{L}$ , 2.75 mmol). After stirring for 10 min, the reaction mixture was added imidazole (112 mg, 1.65 mmol), and stirring was continued at 55  $^\circ\text{C}$ . After stirring for 12 h, the reaction was added 1.0 M citric acid in MeOH (6.0 mL) at room temperature. After 2 h, the resulting solution was added 1.0 M KF aq. (1.0 mL) and stirred for additional 1 h. The resulting mixture was partitioned between EtOAc (20 mL) and saturated  $\text{NaHCO}_3$  aq. (6 mL). The organic phase was collected and the aqueous phase was extracted with EtOAc (20 mL) twice. The combined organic extract was washed with brine, dried over anhydrous  $\text{Na}_2\text{SO}_4$ , filtered and concentrated *in vacuo*. The residue was purified by flash column chromatography on neutralized silica gel (40 to 50% EtOAc in *n*-hexane) to afford **S14b** (115 mg, 0.35 mmol, 64%) as a white powder.

$R_f$  = 0.42 (*n*-hexane/EtOAc = 1:2, UV, Ce-PMA, 2,4-DNP); M.p. 173.0–175.0  $^\circ\text{C}$  (decomp.); IR (neat,  $\text{cm}^{-1}$ ) 3406, 1760, 1717, 1454, 1380;  $^1\text{H}$  NMR ( $\text{CDCl}_3$ , 400 MHz)  $\delta$  9.82 (s, 1H), 6.34 (d,  $J$  = 9.6 Hz, 1H), 5.92 (dd,  $J$  = 9.2, 3.7 Hz, 1H), 5.30 (s, 1H), 5.00 (s, 1H), 4.19 (t,  $J$  = 5.5 Hz, 1H), 3.74 (s, 1H), 3.21 (d,  $J$  = 10.1 Hz, 1H), 2.81 (d,  $J$  = 10.1 Hz, 1H), 2.49 (d,  $J$  = 13.3 Hz, 1H), 2.21 (d,  $J$  = 12.8 Hz, 2H), 2.12–1.68 (m, 9H), 1.23 (s, 3H);  $^{13}\text{C}$  NMR ( $\text{CDCl}_3$ , 100 MHz)  $\delta$  200.7, 178.3, 156.1, 132.6, 132.5, 108.1, 90.4, 77.5, 69.7, 56.4, 53.4, 51.4, 50.9, 50.3, 45.9, 41.9, 38.2, 16.9, 14.9; HRMS calcd for  $\text{C}_{19}\text{H}_{22}\text{ONa}_5$  ( $[\text{M} + \text{Na}^+]$ ) 353.1365, found 353.1353.

***N*-(2-(1-(4-Chlorobenzoyl)-5-methoxy-2-methyl-1H-indol-3-yl)acetyl)-2-nitrobenzenesulfonylhydrazide (**S15a**)**

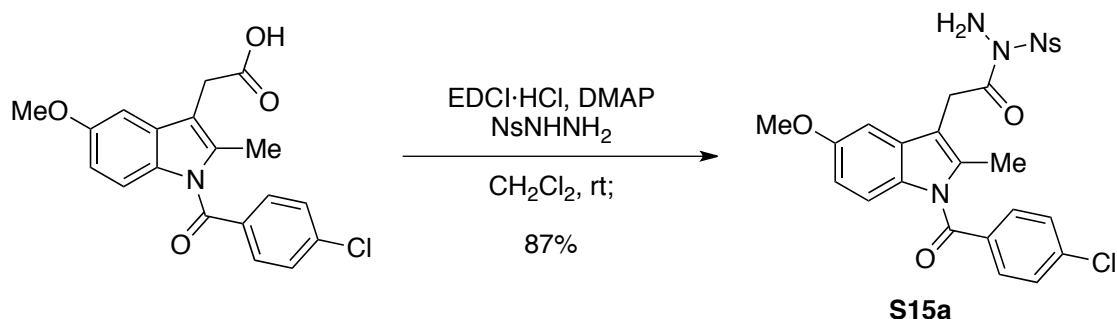

To a solution of Indomethacin (358 mg, 1.00 mmol) in  $\text{CH}_2\text{Cl}_2$  (10 mL) at room temperature was added EDCI·HCl (288 mg, 1.50 mmol), 4-dimethylaminopyridine (24.4 mg, 0.20 mmol) and *o*-NsNHNH<sub>2</sub> (326 mg, 1.50 mmol). After 2 h, the reaction was quenched with saturated  $\text{NH}_4\text{Cl}$  aq. (5 mL) and partitioned between EtOAc (30 mL) and  $\text{H}_2\text{O}$  (10 mL). The organic phase was collected and the aqueous phase was extracted with EtOAc (30 mL) twice. The combined organic extract was washed with brine (10 mL) twice, dried over anhydrous  $\text{Na}_2\text{SO}_4$ , filtered and concentrated *in vacuo*. The residue was purified by flash column chromatography on neutralized silica gel (10-20% EtOAc in *n*-hexane) to afford **S15a** (486 mg, 0.87 mmol, 87%) as a yellow powder.

$R_f$  = 0.66 (*n*-hexane/EtOAc = 1:1, UV, Ce-PMA); M.p. 93.0–95.0 °C; IR (neat,  $\text{cm}^{-1}$ ) 1684, 1541, 1477, 1362, 1324;  $^1\text{H}$  NMR ( $\text{CDCl}_3$ , 400 MHz)  $\delta$  8.45 (dd,  $J$  = 7.3, 1.8 Hz, 1H), 7.81–7.69 (m, 3H), 7.65 (d,  $J$  = 8.2 Hz, 2H), 7.46 (d,  $J$  = 8.7 Hz, 2H), 6.75 (d,  $J$  = 7.2 Hz, 1H), 6.73 (d,  $J$  = 2.3 Hz, 1H), 6.58 (dd,  $J$  = 8.7, 2.3 Hz, 1H), 4.74 (s, 2H), 4.05 (s, 2H), 3.69 (s, 3H), 2.33 (s, 3H);  $^{13}\text{C}$  NMR ( $\text{CDCl}_3$ , 100 MHz)  $\delta$  172.1, 168.2, 155.7, 147.4, 139.3, 136.5, 135.5, 134.8, 133.8, 132.6, 132.4, 131.2, 130.7, 130.5, 129.1, 124.7, 114.8, 111.5, 111.3, 101.1, 55.5, 31.6, 13.4; HRMS calcd for  $\text{C}_{25}\text{H}_{21}\text{ClN}_4\text{NaO}_7\text{S}$  ( $[\text{M} + \text{Na}^+]$ ) 579.0717, found 579.0697.



**2-(1-(4-Chlorobenzoyl)-5-methoxy-2-methyl-1H-indol-3-yl)acetaldehyde (S15b)**

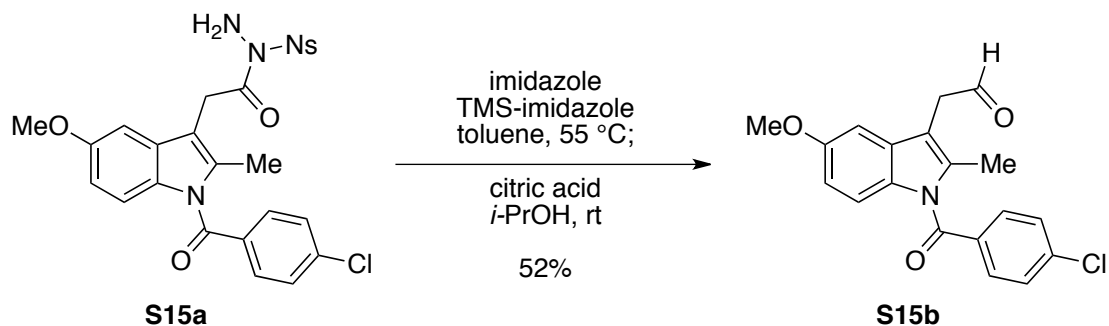

To a solution of **S15a** (150 mg, 0.27 mmol) in toluene (1.3 mL) at room temperature was added TMS-imidazole (80  $\mu\text{L}$ , 0.54 mmol). After stirring for 5 min, the reaction mixture was added imidazole (37 mg, 0.54 mmol) and stirring was continued at 55  $^{\circ}\text{C}$ . After 20 h, the reaction mixture was added 0.5 M citric acid in *i*-PrOH (5.0 mL) at room temperature and stirred for additional 2 h. The resulting mixture was partitioned between EtOAc (10 mL) and saturated  $\text{NaHCO}_3$  aq. (6 mL). The organic phase was collected and the aqueous phase was extracted with EtOAc (10 mL) twice. The combined organic extract was washed with brine, dried over anhydrous  $\text{Na}_2\text{SO}_4$ , filtered and concentrated *in vacuo*. The residue was purified by flash column chromatography on neutralized silica gel (10 to 15% EtOAc in *n*-hexane) to afford **S15b** (48.3 mg, 0.14 mmol, 52%) as a yellow crystal.

$R_f$  = 0.44 (*n*-hexane/EtOAc = 2:1, UV, Ce-PMA, 2,4-DNP); M.p. 121.5–123.0  $^{\circ}\text{C}$ ; IR (neat,  $\text{cm}^{-1}$ ) 1723, 1683, 1590, 1477, 1357, 1317;  $^1\text{H}$  NMR ( $\text{CDCl}_3$ , 400 MHz)  $\delta$  9.71 (s, 1H), 7.68 (d,  $J$  = 6.4 Hz, 2H), 7.48 (d,  $J$  = 6.8 Hz, 2H), 6.85 (d,  $J$  = 9.2 Hz, 2H), 6.68 (d,  $J$  = 9.2 Hz, 1H), 3.83 (s, 3H), 3.72 (s, 2H), 2.38 (s, 3H);  $^{13}\text{C}$  NMR ( $\text{CDCl}_3$ , 100 MHz)  $\delta$  198.0, 168.2, 156.1, 139.4, 136.5, 133.7, 131.2, 130.9, 130.6, 129.2, 115.1, 111.9, 110.1, 100.8, 55.7, 39.4, 13.3; HRMS calcd for  $\text{C}_{19}\text{H}_{16}\text{ClNNaO}_3$  ( $[\text{M} + \text{Na}^+]$ ) 364.0716, found 364.0703.

***tert*-Butyl 2-cinnamoyl-2-tosylhydrazinecarboxylate (**S16a**)**

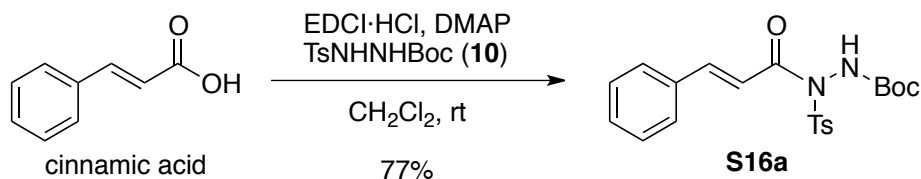

To a stirred solution of cinnamic acid (**24**, 163 mg, 1.10 mmol) in CH<sub>2</sub>Cl<sub>2</sub> (10 mL) at room temperature was added EDCI·HCl (230 mg, 1.20 mmol), 4-dimethylaminopyridine (12.2 mg, 0.10 mmol) and TsNHNHBoc (**10**, 286. mg, 1.00 mmol). After 2 h, the reaction was quenched with saturated NH<sub>4</sub>Cl aq. (5 mL) and partitioned between EtOAc (40 mL) and H<sub>2</sub>O (10 mL). The organic phase was collected and the aqueous phase was extracted with EtOAc (40 mL) twice. The combined organic extract was washed with brine (10 mL) twice, dried over anhydrous Na<sub>2</sub>SO<sub>4</sub>, filtered and concentrated *in vacuo*. The residue was purified by flash column chromatography on silica gel (10 to 15% EtOAc in *n*-hexane) to afford **S16a** (320 mg, 0.77 mmol, 77%) as a white amorphous solid.

R<sub>f</sub> = 0.47 (*n*-hexane/EtOAc = 2:1, UV, Ce-PMA); IR (neat, cm<sup>-1</sup>) 1733, 1698, 1617, 1507, 1370, 1246, 1167, 1021; <sup>1</sup>H NMR (CDCl<sub>3</sub>, 400 MHz) δ 8.03 (d, *J* = 8.2 Hz, 2H), 7.73 (d, *J* = 15.6 Hz, 1H), 7.50 (m, 2H), 7.38 (m, 3H), 7.34 (d, *J* = 8.2 Hz, 2H), 7.07 (br, 1H), 6.94 (d, *J* = 15.6 Hz, 1H), 2.43 (s, 3H), 1.52 (br, 9H); <sup>13</sup>C NMR (CDCl<sub>3</sub>, 100 MHz) δ 165.9, 154.2, 147.1, 145.3, 134.9, 134.2, 130.7, 129.7, 129.2, 128.8, 128.4, 83.3, 28.0, 21.7; HRMS calcd for C<sub>20</sub>H<sub>21</sub>N<sub>3</sub>NaO<sub>5</sub>S ([M + Na<sup>+</sup>]) 439.1304, found 439.1312.

***(E)*-N-Cinnamoyl-4-methylbenzenesulfonohydrazide (**S16b**)**

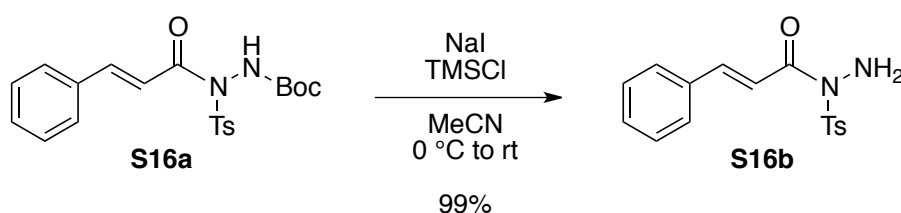

To a stirred solution of **S16a** (320 mg, 0.77 mmol) in MeCN (10 mL) at 0 °C was added NaI (345 mg, 2.31 mmol) and TMSCl (200 μL, 1.54 mmol). The resulting mixture was warmed to room temperature. After stirring for 30 min, the reaction was quenched with saturated NH<sub>4</sub>Cl aq. (5 mL) and partitioned between EtOAc (40 mL) and H<sub>2</sub>O (10 mL). The organic phase was collected and the aqueous phase was extracted with EtOAc (40 mL) twice. The combined organic extract was washed with saturated Na<sub>2</sub>S<sub>2</sub>O<sub>3</sub> aq. (20 mL) and brine (20 mL), and dried over anhydrous Na<sub>2</sub>SO<sub>4</sub>, filtered and concentrated *in vacuo*. The residue was crystallized from toluene (10 mL) to afford **S16b** as a white powder (240 mg, 0.76 mmol, 99%).

$R_f$  = 0.67 (*n*-hexane/EtOAc = 1:1, UV, Ce-PMA); M.p. 146.1–146.5 °C; IR (neat,  $\text{cm}^{-1}$ ) 1667, 1649, 1615, 1346, 1171, 1133, 1090;  $^1\text{H}$  NMR ( $\text{CDCl}_3$ , 400 MHz)  $\delta$  7.91 (d,  $J$  = 8.2 Hz, 2H), 7.72 (d,  $J$  = 15.6 Hz, 1H), 7.57 (m, 2H), 7.55 (d,  $J$  = 15.6 Hz, 1H), 7.57 (m, 3H), 7.34 (d,  $J$  = 8.2 Hz, 2H), 4.48 (s, 2H), 2.44 (s, 3H);  $^{13}\text{C}$  NMR ( $\text{CDCl}_3$ , 100 MHz)  $\delta$  167.0, 146.0, 145.2, 134.7, 134.5, 130.6, 129.6, 128.9, 128.7, 128.4, 117.3, 21.7; HRMS calcd for  $\text{C}_{15}\text{H}_{13}\text{N}_3\text{NaO}_3\text{S}$  ( $[\text{M} + \text{Na}^+]$ ) 339.0779, found 339.0790.

### Synthesis of *trans*-cinnamaldehyde (**S16c**) from **S16b**

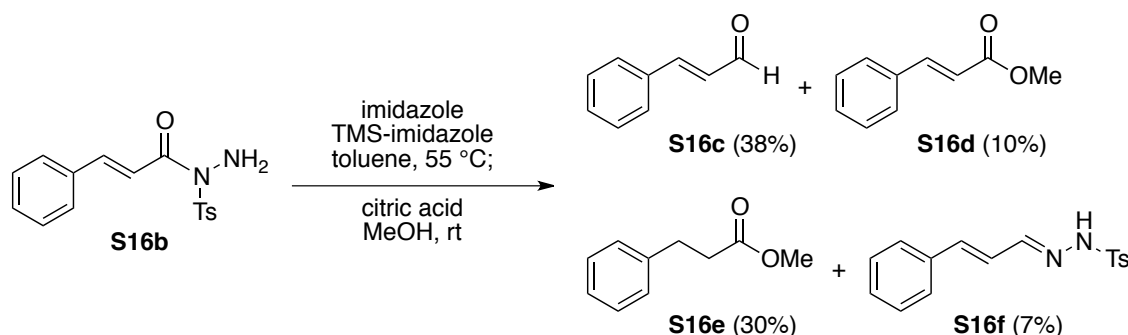

To a stirred solution of **S16b** (20 mg, 0.06 mmol) in toluene (630  $\mu\text{L}$ ) at room temperature was added TMS-imidazole (24  $\mu\text{L}$ , 0.13 mmol). After stirring for 5 min, the reaction mixture was added imidazole (8.6 mg, 0.13 mmol) and stirring was continued at 55 °C. After 12 h, the reaction mixture was added 1.0 M citric acid in MeOH (400  $\mu\text{L}$ ) at room temperature and stirred for additional 2 h. The resulting mixture was partitioned between EtOAc (5 mL) and saturated  $\text{NaHCO}_3$  aq. (5 mL). The organic phase was collected and the aqueous phase was extracted with EtOAc (5 mL) twice. The combined organic extract was washed with brine, dried over anhydrous  $\text{Na}_2\text{SO}_4$ , filtered and concentrated *in vacuo*. The residue was purified by preparative TLC (20% EtOAc in *n*-hexane) to afford **S16f** (1.3 mg, 0.004 mmol, 6.7%) and inseparable mixture (total 7.3 mg) of **S16c** (0.024 mmol, 38%), **S16d** (0.006 mmol, 10%) and **S16e** (0.019 mmol, 30%).

**S16c**:  $R_f$  = 0.69 (*n*-hexane/EtOAc = 2:1, UV, Ce-PMA, 2,4-DNP);  $^1\text{H}$  NMR ( $\text{CDCl}_3$ , 400 MHz)  $\delta$  9.71 (d,  $J$  = 7.8 Hz, 1H), 7.59 (m, 2H), 7.52 (d,  $J$  = 16.0 Hz, 1H), 7.43 (m, 3H), 6.73 (dd,  $J$  = 16.0, 7.8 Hz, 1H).

**S16d**:  $R_f$  = 0.68 (*n*-hexane/EtOAc = 2:1, UV, Ce-PMA, 2,4-DNP);  $^1\text{H}$  NMR ( $\text{CDCl}_3$ , 400 MHz)  $\delta$  7.70 (d,  $J$  = 16.5 Hz, 1H), 7.64–7.29 (m, 5H), 6.45 (d,  $J$  = 16.5 Hz, 1H), 3.81 (s, 3H).

**S16e**:  $R_f$  = 0.68 (*n*-hexane/EtOAc = 2:1, UV, Ce-PMA, 2,4-DNP);  $^1\text{H}$  NMR ( $\text{CDCl}_3$ , 400 MHz)  $\delta$  7.29–7.13 (m, 5H), 3.67 (s, 3H), 2.96 (t,  $J$  = 8.2 Hz, 2H), 2.64 (t,  $J$  = 8.2 Hz, 2H).

**S16f**:  $R_f$  = 0.21 (*n*-hexane/EtOAc = 2:1, UV, Ce-PMA, 2,4-DNP);  $^1\text{H}$  NMR ( $\text{CDCl}_3$ , 400 MHz)  $\delta$  7.84 (d,  $J$  = 8.2 Hz, 2H), 7.67 (s, 1H), 7.55 (d,  $J$  = 8.2 Hz, 2H), 7.40 (d,  $J$  = 6.4 Hz, 1H), 7.37–7.26 (m, 5H), 6.87–6.80 (m, 1H), 6.81 (d,  $J$  = 6.4 Hz, 1H), 2.42 (s, 3H).

### Synthesis of deuterated *trans*-cinnamaldehyde (**24**) via deuterated substrate **23**

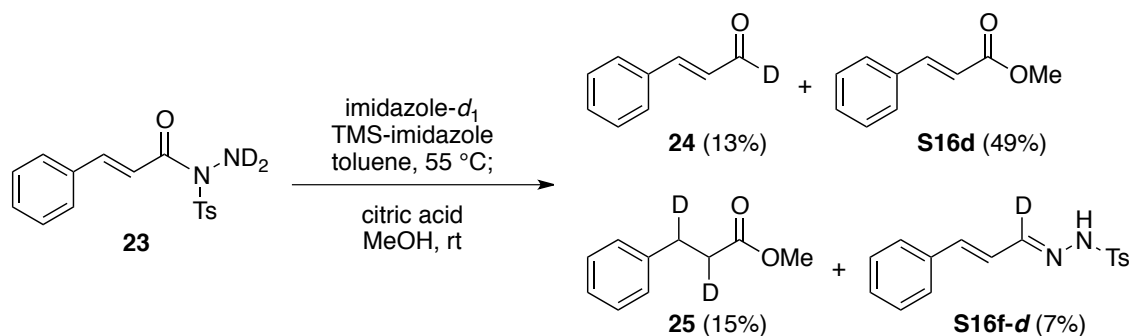

The stirred solution of **S16b** (11.0 mg, 0.040 mmol) in CD<sub>3</sub>OD (650 μL) under Ar was heated at 70 °C. After stirring for 7 h, the solvent was removed under reduced pressure. The deuteriomic content of **23** was determined by <sup>1</sup>H NMR to be >99%. To a solution of **23** (11 mg, 0.040 mmol) in toluene (350 μL) at room temperature was added TMS-imidazole (14 μL, 0.07 mmol). After stirring for 5 min, the reaction mixture was added imidazole (5.0 mg, 0.070 mmol), and stirring was continued at 55 °C. After 12 h, the reaction mixture was added 1.0 M citric acid in MeOH (400 μL) at room temperature and stirred for additional 2 h. The resulting mixture was partitioned between EtOAc (5 mL) and saturated NaHCO<sub>3</sub> aq. (5 mL). The organic phase was collected and the aqueous phase was extracted with EtOAc (5 mL) twice. The combined organic extract was washed with brine, dried over anhydrous Na<sub>2</sub>SO<sub>4</sub>, filtered and concentrated *in vacuo*. The residue was purified by preparative TLC (20% EtOAc in *n*-hexane) to afford **S16f-d** (0.7 mg, 0.002 mmol, 7%) and inseparable mixture (total 4.3 mg) of **24** (0.005 mmol, 13%), **S16d** (0.017 mmol, 49%) and **25** (0.005 mmol, 15%).

**24**: *R*<sub>f</sub> = 0.69 (*n*-hexane/EtOAc = 2:1, UV, Ce-PMA, 2,4-DNP); <sup>1</sup>H NMR (CDCl<sub>3</sub>, 400 MHz) δ 7.59 (m, 2H), 7.52 (d, *J* = 16.0 Hz, 1H), 7.43 (m, 3H), 6.73 (dd, *J* = 16.0, 7.8 Hz, 1H).

**25**: *R*<sub>f</sub> = 0.68 (*n*-hexane/EtOAc = 2:1, UV, Ce-PMA, 2,4-DNP); <sup>1</sup>H NMR (CDCl<sub>3</sub>, 400 MHz) δ 7.29–7.13 (m, 5H), 3.67 (s, 3H), 2.96 (t, *J* = 8.2 Hz, 2H(44%-*d*)), 2.64 (t, *J* = 8.2 Hz, 2H(63%-*d*)).\*

**S16f-d**: *R*<sub>f</sub> = 0.21 (*n*-hexane/EtOAc = 2:1, UV, Ce-PMA, 2,4-DNP); <sup>1</sup>H NMR (CDCl<sub>3</sub>, 400 MHz) δ 7.84 (d, *J* = 8.2 Hz, 2H), 7.67 (s, 1H), 7.55 (d, *J* = 8.2 Hz, 2H), 7.40 (d, *J* = 6.4 Hz, 1H), 7.37–7.26 (m, 5H), 6.87–6.80 (m, 1H), 2.42 (s, 3H).

\* The slight difference of the deuterated content in **25** could be explained by the H-D exchange at the α-position of the intermediate **28** under basic conditions.

***tert*-Butyl-2-((2-nitrophenyl)sulfonyl)-2-((1R)-4,7,7-trimethyl-3-oxo-2-oxabicyclo[2.2.1]heptane-1-carbonyl)hydrazinecarboxylate (**S17**)**

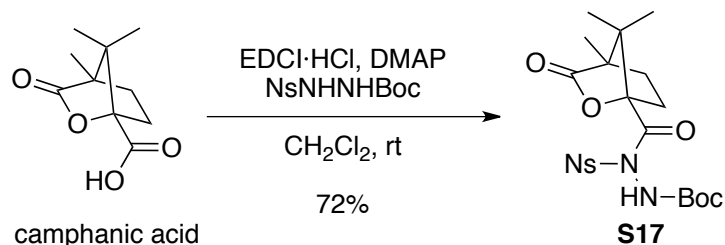

To a stirred solution of (–)-camphanic acid (100 mg, 0.50 mmol) in CH<sub>2</sub>Cl<sub>2</sub> (10 mL) at room temperature was added EDCI·HCl (145 mg, 0.76 mmol), 4-dimethylaminopyridine (12.0 mg, 0.05 mmol) and NsNHNHBoc (160 mg, 0.50 mmol). After 3 h, the reaction was quenched with saturated NH<sub>4</sub>Cl aq. (5 mL) and partitioned between EtOAc (40 mL) and H<sub>2</sub>O (10 mL). The organic phase was collected and the aqueous phase was extracted with EtOAc (40 mL) twice. The combined organic extract was washed with brine (10 mL) twice, dried over anhydrous Na<sub>2</sub>SO<sub>4</sub>, filtered and concentrated *in vacuo*. The residue was purified by flash column chromatography on silica gel (EtOAc in *n*-hexane, 20 to 40%) to afford **S17** as a pale yellow amorphous solid (180 mg, 0.36 mmol, 72%).

*R*<sub>f</sub> = 0.42 (*n*-hexane/EtOAc = 1:1, UV, Ce-PMA); IR (neat, cm<sup>–1</sup>) 3387, 3101, 1793, 1744, 1592, 1545, 1468, 1371, 1249, 1180, 1092, 1039; <sup>1</sup>H NMR (CDCl<sub>3</sub>, 400 MHz) δ 8.55 (m, 1H), 7.82 (m, 3H), 2.42–1.23 (m, 4H), 1.53 (s, 9H), 1.06 (s, 3H), 1.04 (s, 6H); <sup>13</sup>C NMR (CDCl<sub>3</sub>, 100 MHz) δ 177.7, 167.5, 154.3, 147.9, 135.1, 132.3, 131.5, 124.7, 91.2, 83.7, 55.1, 53.8, 30.5, 28.8, 28.0, 16.8, 16.3, 9.5; HRMS calcd for C<sub>16</sub>H<sub>17</sub>N<sub>3</sub>NaO<sub>6</sub>S ([M + Na<sup>+</sup>]) 520.1366, found 520.1344.

**2-Nitro-*N*-((1R)-4,7,7-trimethyl-3-oxo-2-oxabicyclo[2.2.1]heptane-1-carbonyl)benzenesulfonohydrazide (**34**)**

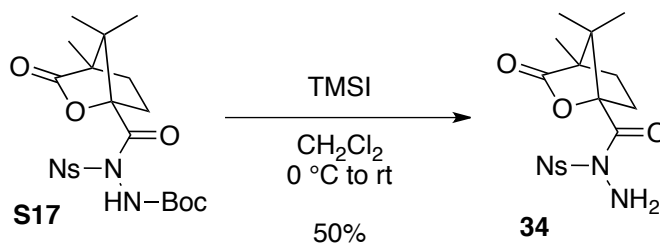

To a stirred solution of **S17** (100 mg, 0.20 mmol) in CH<sub>2</sub>Cl<sub>2</sub> (200 μL) at 0 °C was added 1.0 M TMSI in CH<sub>2</sub>Cl<sub>2</sub> (1.0 mL). The resulting mixture was warmed to room temperature. After stirring for 6 h, the reaction was quenched with saturated NH<sub>4</sub>Cl aq. (2 mL) and partitioned between EtOAc

(15 mL) and H<sub>2</sub>O (10 mL). The organic phase was collected and the aqueous phase was extracted with EtOAc (30 mL). The combined organic extract was washed with saturated Na<sub>2</sub>S<sub>2</sub>O<sub>3</sub> aq. (5 mL) and brine (5 mL), dried over anhydrous Na<sub>2</sub>SO<sub>4</sub>, filtered and concentrated *in vacuo*. The residue was purified by flash column chromatography on neutralized silica gel (40% EtOAc in *n*-hexane) to afford **34** as a white powder (40.0 mg, 0.10 mmol, 50%).

*R*<sub>f</sub> = 0.31 (*n*-hexane/EtOAc = 1:1, UV, Ce-PMA); M.p. 123.3–123.5 °C; IR (neat, cm<sup>-1</sup>) 2970, 1784, 1698, 1541, 1366, 1173, 1092, 1031; <sup>1</sup>H NMR (CDCl<sub>3</sub>, 400 MHz) δ 8.48 (m, 1H), 7.85 (m, 3H), 4.70 (s, 2H), 2.63 (dt, *J* = 9.2, 4.6 Hz, 1H), 2.33 (dt, *J* = 12.8, 4.6 Hz, 1H), 1.86 (dt, *J* = 12.8, 4.6 Hz, 1H), 1.74 (d, *J* = 9.2, 4.6 Hz, 1H), 1.08 (s, 3H), 1.04 (s, 3H), 0.97 (s, 3H); <sup>13</sup>C NMR (CDCl<sub>3</sub>, 100 MHz) δ 178.2, 168.0, 147.8, 135.2, 135.0, 132.8, 132.6, 124.7, 91.5, 54.6, 53.9, 29.9, 29.1, 17.0, 16.6, 9.5; HRMS calcd for C<sub>19</sub>H<sub>20</sub>N<sub>4</sub>NaO<sub>4</sub>S ([M + Na<sup>+</sup>]) 420.0841, found 420.0833.

**(1*R*)-4,7,7-trimethyl-3-oxo-2-oxabicyclo[2.2.1]heptane-1-carbaldehyde (35),**

**(1*s*,3*s*)-1,2,2-trimethylcyclopentane-1,3-dicarboxylic acid (36),**

**1,8,8-trimethyl-3-oxabicyclo[3.2.1]octane-2,4-dione (37)**

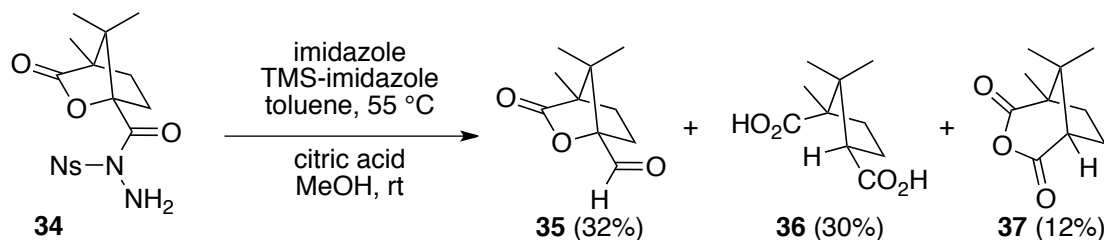

To a stirred solution of **34** (37.3 mg, 0.09 mmol) in toluene (1.0 mL) at room temperature was added TMS-imidazole (36 μL, 0.19 mmol). After stirring for 5 min, the reaction mixture was added imidazole (12.8 mg, 0.19 mmol) and stirring was continued at 55 °C. After 14 h, the reaction mixture was added 1.0 M citric acid in MeOH (2.0 mL) at room temperature and stirred for additional 2 h. The resulting mixture was partitioned between saturated NH<sub>4</sub>Cl aq. (5 mL) and EtOAc (10 mL). The organic phase was collected and the aqueous phase was extracted with EtOAc (40 mL) twice. The combined organic extract was washed with brine, and dried over anhydrous Na<sub>2</sub>SO<sub>4</sub>, filtered and concentrated *in vacuo*. The residue was purified by preparative TLC (33% EtOAc in *n*-hexane) to afford **37** (2.1 mg, 0.012 mmol, 12%), and inseparable mixture (total 11.3 mg) of **35** and **36**. The mixture was partitioned between saturated NaHCO<sub>3</sub> aq. (2 mL) and EtOAc (2 mL). The organic phase was washed with saturated NaHCO<sub>3</sub> aq. (2 mL) twice, dried over anhydrous Na<sub>2</sub>SO<sub>4</sub>, filtered and concentrated *in vacuo* to afford **35** (5.5 mg, 0.030 mmol, 32%). The

combined aqueous phase was added 1.0 M HCl aq. until it becomes acidic (pH = 2), and extracted with CH<sub>2</sub>Cl<sub>2</sub> (2 mL) twice. The combined organic extract was washed with brine, dried over anhydrous Na<sub>2</sub>SO<sub>4</sub>, filtered and concentrated *in vacuo* to afford **36** (5.7 mg, 0.029 mmol, 30%).

**35**: R<sub>f</sub> = 0.30 (*n*-hexane/EtOAc = 2:1, UV, Ce-PMA, 2,4-DNP); <sup>1</sup>H NMR (CDCl<sub>3</sub>, 400 MHz) δ 9.92 (s, 1H), 2.37–2.30 (m, 1H), 1.95–1.88 (m, 2H), 1.74–1.70 (m, 1H), 1.12 (s, 3H), 1.02 (s, 6H).

**36**<sup>\*</sup>: R<sub>f</sub> = 0.16 (*n*-hexane/EtOAc = 1:1, UV, Ce-PMA, 2,4-DNP); <sup>1</sup>H NMR (CDCl<sub>3</sub>, 400 MHz) δ 2.96 (t, *J* = 10.1 Hz, 1H), 2.25–2.15 (m, 2H), 2.10–2.00 (m, 1H), 1.71–1.61 (m, 1H), 1.19 (s, 3H), 1.16 (s, 3H), 0.93 (s, 3H); <sup>1</sup>H NMR (DMSO-*d*<sub>6</sub>, 400 MHz) δ 12.11 (brs, 2H), 2.83 (t, *J* = 9.1 Hz, 1H), 2.07–1.93 (m, 2H), 1.84–1.79 (m, 1H), 1.56–1.50 (m, 1H), 1.04 (s, 3H), 1.01 (s, 3H), 0.81 (s, 3H).

**37**: R<sub>f</sub> = 0.48 (*n*-hexane/EtOAc = 2:1, UV, Ce-PMA, 2,4-DNP); <sup>1</sup>H NMR (CDCl<sub>3</sub>, 400 MHz) δ 2.83 (d, *J* = 6.4 Hz, 1H), 2.26–2.23 (m, 1H), 2.17–2.09 (m, 1H), 2.04–1.93 (m, 2H), 1.27 (s, 3H), 1.10 (s, 3H), 1.00 (s, 3H).

---

<sup>\*</sup> Lesac, A.; Moslavac-Forjan, D.; Bruce, D. W.; Šunjić, V. *Helv. Chim. Acta*, **1999**, 82, 1707.

## Computational Section

### Details of Computational Methods

All calculations were carried with the Gaussian 09 program package.\* The global reaction route mapping method (GRRM) based on Gaussian 09 was utilized for locating all local equilibrium structures and TS structures and for geometry optimization. The molecular structures and harmonic vibrational frequencies were obtained using the hybrid density functional method based on M062X.† We used 6–31+G\* for the other atoms. Geometry optimization and vibrational analysis were performed at the same level. All stationary points were optimized without any symmetry assumptions, and characterized by normal coordinate analysis at the same level of theory (number of imaginary frequencies, NIMAG, 0 for minima and 1 for TSs). The intrinsic reaction coordinate (IRC) method was used to track minimum energy paths from transition structures to the corresponding local minima.

---

\* Gaussian 09, Revision C.01, Frisch, M. J.; Trucks, G. W.; Schlegel, H. B.; Scuseria, G. E.; Robb, M. A.; Cheeseman, J. R.; Scalmani, G.; Barone, V.; Mennucci, B.; Petersson, G. A.; Nakatsuji, H.; Caricato, M.; Li, X.; Hratchian, H. P.; Izmaylov, A. F.; Bloino, J.; Zheng, G.; Sonnenberg, J. L.; Hada, M.; Ehara, M.; Toyota, K.; Fukuda, R.; Hasegawa, J.; Ishida, M.; Nakajima, T.; Honda, Y.; Kitao, O.; Nakai, H.; Vreven, T.; Montgomery, Jr., J. A.; Peralta, J. E.; Ogliaro, F.; Bearpark, M.; Heyd, J. J.; Brothers, E.; Kudin, K. N.; Staroverov, V. N.; Kobayashi, R.; Normand, J.; Raghavachari, K.; Rendell, A.; Burant, J. C.; Iyengar, S. S.; Tomasi, J.; Cossi, M.; Rega, N.; Millam, N. J.; Klene, M.; Knox, J. E.; Cross, J. B.; Bakken, V.; Adamo, C.; Jaramillo, J.; Gomperts, R.; Stratmann, R. E.; Yazyev, O.; Austin, A. J.; Cammi, R.; Pomelli, C.; Ochterski, J. W.; Martin, R. L.; Morokuma, K.; Zakrzewski, V. G.; Voth, G. A.; Salvador, P.; Dannenberg, J. J.; Dapprich, S.; Daniels, A. D.; Farkas, Ö.; Foresman, J. B.; Ortiz, J. V.; Cioslowski, J.; Fox, D. J. Gaussian, Inc., Wallingford CT, 2009.

† (a) Zhao, Y.; Truhlar, D. G. *Theor. Chem. Acc.* **2008**, *120*, 215-241; (b) Zhao, Y.; Truhlar, D. G. *Acc. Chem. Res.* **2008**, *41*, 157-167.



### 3-1. Cartesian Coordinates and Free Energies

#### CP1

$\Delta G_{298K} = -1304.273940$  A.U.

|   |             |             |             |
|---|-------------|-------------|-------------|
| C | -0.69655724 | 2.01872742  | 0.33174632  |
| N | -1.48391599 | 1.71046765  | -0.81953432 |
| C | 0.02103935  | 0.87759562  | 1.01897083  |
| O | -0.54988406 | 3.16202469  | 0.67202293  |
| N | -2.04426982 | 2.80109494  | -1.48647941 |
| H | -0.61864255 | 0.01830487  | 1.21923548  |
| H | 0.86920712  | 0.56867363  | 0.39934052  |
| H | 0.40940285  | 1.27148740  | 1.95713605  |
| H | -2.02077123 | 2.62558222  | -2.48417794 |
| H | -3.00552723 | 2.94468397  | -1.15508578 |
| S | -2.23660895 | 0.18909954  | -1.04968335 |
| O | -2.66553053 | -0.38843004 | 0.22972877  |
| O | -3.21725573 | 0.37993707  | -2.10462045 |
| C | -0.94058188 | -0.84923894 | -1.69898240 |
| H | -1.41352705 | -1.80538576 | -1.93032135 |
| H | -0.16191697 | -0.97885773 | -0.94956081 |
| H | -0.55538900 | -0.37779369 | -2.60286461 |
| C | -5.84374577 | 2.91062541  | -1.17154190 |
| C | -6.97352293 | 2.31421333  | -0.67909807 |
| N | -6.58758911 | 1.72387691  | 0.49769259  |
| C | -5.26041801 | 1.95569254  | 0.65613745  |
| N | -4.77986202 | 2.68099147  | -0.32917258 |
| H | -5.73428764 | 3.48484303  | -2.07969977 |
| H | -7.97893226 | 2.23077295  | -1.05880990 |
| H | -7.14296739 | 1.07445635  | 1.04087479  |
| H | -4.69491859 | 1.57386037  | 1.49462179  |
| C | -7.63908563 | -1.46984503 | 0.46147700  |
| C | -6.41268992 | -1.56147949 | 1.07836146  |
| N | -5.50266830 | -1.18514096 | 0.12353457  |
| C | -6.19890580 | -0.87265108 | -1.00020379 |
| N | -7.49419369 | -1.03783853 | -0.83382481 |
| H | -8.60943282 | -1.70857820 | 0.87324270  |
| H | -6.11728865 | -1.87660602 | 2.06693734  |
| H | -4.50240890 | -1.05953188 | 0.24894133  |
| H | -5.70694599 | -0.49777921 | -1.88774525 |

#### TS1

$\Delta G_{298K} = -1304.259383$  A.U.

|   |             |             |              |
|---|-------------|-------------|--------------|
| C | -0.40847102 | 1.95386458  | -0.45710886  |
| N | -1.74863737 | 2.39660332  | -0.02850191  |
| C | 0.47979914  | 1.57008533  | 0.686646801  |
| O | -0.07405457 | 2.05492092  | -1.61525505  |
| N | -2.45484794 | 2.78439106  | -0.97762040  |
| H | -0.10638200 | 1.21061065  | 1.53290621   |
| H | 1.19351996  | 0.81555156  | 0.353739827  |
| H | 1.04152449  | 2.45834335  | 0.994892271  |
| H | -2.05030984 | 2.68718507  | -1.92282493  |
| H | -3.57801052 | 2.96406741  | -0.73697852  |
| S | -2.13973257 | -0.09014624 | -0.445707940 |
| O | -2.87531058 | -0.78021893 | 0.67927924   |
| O | -3.02068943 | 0.34255882  | -1.58335671  |
| C | -1.07233987 | -1.36181723 | -1.163891566 |
| H | -1.72806119 | -2.14666914 | -1.546959719 |

|   |             |             |              |
|---|-------------|-------------|--------------|
| H | -0.42130091 | -1.74866418 | -0.379029016 |
| H | -0.49885760 | -0.90477986 | -1.971813429 |
| C | -6.12500363 | 3.37168358  | -0.74349234  |
| C | -7.15328290 | 2.58686269  | -0.30205107  |
| N | -6.56673859 | 1.57721340  | 0.42092949   |
| C | -5.23393417 | 1.75160137  | 0.38404038   |
| N | -4.93396990 | 2.83799686  | -0.30616070  |
| H | -6.16270673 | 4.26815195  | -1.34239218  |
| H | -8.21933640 | 2.64449584  | -0.44805620  |
| H | -7.03164123 | 0.74325703  | 0.77131309   |
| H | -4.52156449 | 1.06668561  | 0.82743182   |
| C | -7.72544315 | -1.46438191 | -0.08697489  |
| C | -6.61304833 | -1.69525117 | 0.69278891   |
| N | -5.54344402 | -1.35158745 | -0.09354977  |
| C | -6.03840008 | -0.92742472 | -1.28466275  |
| N | -7.35523486 | -0.98285939 | -1.31841415  |
| H | -8.76195756 | -1.64086189 | 0.16405367   |
| H | -6.49245868 | -2.09166989 | 1.68915514   |
| H | -4.55509136 | -1.32746899 | 0.18426293   |
| H | -5.38608397 | -0.56078044 | -2.06598362  |

#### CP2

$\Delta G_{298K} = -1304.269348$  A.U.

|   |             |              |             |
|---|-------------|--------------|-------------|
| C | -0.08850677 | 2.24810310   | -0.48391968 |
| N | -1.36893284 | 2.89722979   | -0.03902276 |
| C | 0.82822658  | 1.96764912   | 0.65856483  |
| O | 0.12261262  | 2.05134717   | -1.64988885 |
| N | -2.21045929 | 2.98094283   | -0.93491664 |
| H | 0.28905219  | 1.38992920   | 1.41402062  |
| H | 1.70980521  | 1.43097930   | 0.31187999  |
| H | 1.11653100  | 2.91823724   | 1.11896345  |
| H | -1.88222850 | 2.55787223   | -1.82876403 |
| H | -3.94985044 | 2.92316883   | -0.53544314 |
| S | -2.19268322 | -0.17627020  | -0.29042696 |
| O | -3.12205546 | -0.760223708 | 0.79386321  |
| O | -3.03317743 | 0.58477266   | -1.31828957 |
| C | -1.72792352 | -1.66134916  | -1.21791789 |
| H | -2.65531074 | -2.11366032  | -1.58021320 |
| H | -1.19840807 | -2.34446508  | -0.55148866 |
| H | -1.09603858 | -1.36199956  | -2.05625385 |
| C | -6.09248508 | 3.26191609   | -0.71506613 |
| C | -7.12321135 | 2.48442368   | -0.28302018 |
| N | -6.55461860 | 1.43910188   | 0.40996223  |
| C | -5.22604608 | 1.55263258   | 0.37962121  |
| N | -4.93051801 | 2.66098927   | -0.28628488 |
| H | -6.09028691 | 4.17158910   | -1.29194251 |
| H | -8.18780439 | 2.57074903   | -0.42185923 |
| H | -7.03927600 | 0.59966849   | 0.73118673  |
| H | -4.51004493 | 0.83881356   | 0.77785171  |
| C | -7.75541144 | -1.51713896  | -0.20716826 |
| C | -6.67602240 | -1.779801797 | 0.61192606  |
| N | -5.56927901 | -1.44368861  | -0.12264259 |
| C | -6.01080152 | -0.98929026  | -1.32205814 |
| N | -7.32807478 | -1.01963728  | -1.41342771 |
| H | -8.80356091 | -1.68634165  | -0.00292836 |
| H | -6.60223585 | -2.197647791 | 1.60446182  |

|   |             |              |             |
|---|-------------|--------------|-------------|
| H | -4.58099655 | -1.372873252 | 0.21750761  |
| H | -5.32180422 | -0.60893856  | -2.06581001 |

CP3

$\Delta G_{298K} = -715.694614$  A.U.

|   |             |             |             |
|---|-------------|-------------|-------------|
| C | -0.15697434 | 0.71856442  | 1.25051390  |
| C | -1.10496386 | 1.41910235  | 2.16440201  |
| O | 0.36402697  | -0.36769492 | 1.46369590  |
| N | 0.41812747  | 1.49609448  | 0.18910299  |
| N | 0.07116992  | 1.39450444  | -0.99085098 |
| H | -0.52377876 | 2.07460535  | 2.82198379  |
| H | -1.62798917 | 0.67811807  | 2.76848984  |
| H | -1.81262356 | 2.02701432  | 1.59906631  |
| H | 1.86393392  | -0.52353507 | 0.58317129  |
| C | 3.78790180  | -1.42878826 | 0.20597619  |
| C | 4.80481465  | -1.02023902 | -0.60073821 |
| N | 4.37952585  | 0.15139996  | -1.19106946 |
| C | 3.15114199  | 0.45257759  | -0.76456431 |
| N | 2.77882639  | -0.49974434 | 0.08352776  |
| H | 3.70219763  | -2.28867323 | 0.85034496  |
| H | 5.77279511  | 1.45112118  | -0.79869497 |
| H | 4.90973843  | 0.70821749  | -1.84956502 |
| H | 2.55890338  | 1.30871920  | -1.05671696 |
| C | -4.39307959 | -0.82198456 | -0.39875431 |
| C | -3.49503381 | 0.17856952  | -0.65132432 |
| N | -2.24972722 | -0.18009519 | -0.18351275 |
| C | -2.39166703 | -1.37962739 | 0.34369320  |
| N | -3.67162546 | -1.80492447 | 0.23486532  |
| H | -5.44635543 | -0.92003140 | -0.60694603 |
| H | -3.67001970 | 1.12548027  | -1.14021508 |
| H | -0.75608483 | 0.75695478  | -1.06265451 |
| H | -1.60943738 | -1.95541959 | 0.81877575  |
| H | -4.03248925 | -2.68860581 | 0.56424620  |

TS2

$\Delta G_{298K} = -715.678519$  A.U.

|   |             |             |              |
|---|-------------|-------------|--------------|
| C | 0.04999462  | 1.15958623  | 0.141650459  |
| C | 0.60526193  | 1.44451238  | 1.505123323  |
| O | 0.55430944  | 0.25326831  | -0.651693412 |
| N | -0.90686628 | 1.89572048  | -0.305746513 |
| N | -1.96556292 | 2.31557649  | -0.665287129 |
| H | 1.65212503  | 1.74888007  | 1.417214936  |
| H | 0.55994552  | 0.52746454  | 2.098725164  |
| H | 0.04344602  | 2.23188619  | 2.007209465  |
| H | 1.59600910  | 0.00372117  | -0.422202471 |
| C | 3.51124559  | -1.02440205 | 0.840974647  |
| C | 4.86068482  | -1.11630326 | 0.652446855  |
| N | 5.11670472  | -0.43396500 | -0.513277135 |
| C | 3.95154316  | 0.04294356  | -0.992738052 |
| N | 2.95985282  | -0.29850459 | -0.191034765 |
| H | 2.91020487  | -1.43516513 | 1.637444531  |
| H | 5.63797881  | -1.59603014 | 1.224856038  |
| H | 6.02313316  | -0.31106370 | -0.943013777 |
| H | 3.86282350  | 0.61501950  | -1.904445831 |
| C | -4.80525321 | -1.43164340 | 0.334571023  |

|   |             |             |              |
|---|-------------|-------------|--------------|
| C | -4.58831140 | -0.08413835 | 0.383857517  |
| N | -3.33703691 | 0.18479513  | -0.121413052 |
| C | -2.80174272 | -0.97019028 | -0.473836866 |
| N | -3.66300592 | -1.97171820 | -0.209714915 |
| H | -5.64919016 | -2.03573391 | 0.625788121  |
| H | -5.24165681 | 0.69756026  | 0.738675568  |
| H | -2.73150725 | 1.44995584  | -0.391697006 |
| H | -1.82160650 | -1.10816931 | -0.912019364 |
| H | -3.49947104 | -2.95146780 | -0.394387338 |

CP4

$\Delta G_{298K} = -715.680966$  A.U.

|   |             |             |             |
|---|-------------|-------------|-------------|
| C | 0.02271145  | 0.99748750  | 0.52145883  |
| C | 0.55424012  | 1.46337754  | 1.83891337  |
| O | 0.29900032  | 0.23808661  | 0.03103654  |
| N | -0.73937807 | 1.73731114  | -0.20114125 |
| N | -1.50410055 | 2.31220354  | -0.86628870 |
| H | 1.64896241  | 1.47616609  | 1.81510766  |
| H | 0.23838188  | 0.77667204  | 2.63030912  |
| H | 0.20014222  | 2.46826284  | 2.07408721  |
| H | 1.32715636  | 0.35332816  | -0.06718782 |
| C | 3.72142719  | 0.89664487  | 0.81188354  |
| C | 5.01381107  | 0.79777892  | 0.37806123  |
| N | 4.93579812  | 0.24613200  | -0.87860325 |
| C | 3.63338386  | 0.03142114  | -1.16425929 |
| N | 2.87253484  | 0.41538412  | -0.15891541 |
| H | 3.35234264  | 1.28353149  | 1.74948496  |
| H | 5.95269305  | 1.06406508  | 0.83592443  |
| H | 5.71533218  | 0.03781036  | -1.48593486 |
| H | 3.28889626  | 0.39436725  | -2.09506295 |
| C | -4.84255795 | -1.35161225 | 0.01069833  |
| C | -4.72965243 | -0.02129146 | -0.25224590 |
| N | -3.38438458 | 0.24971779  | -0.36497859 |
| C | -2.68194458 | -0.86339674 | -0.18054807 |
| N | -3.55551800 | -1.84663607 | 0.04955999  |
| H | -5.70812607 | -1.97410400 | 0.16935469  |
| H | -5.48288392 | 0.74082849  | -0.37005042 |
| H | -2.94805447 | 1.17415449  | -0.56817175 |
| H | -1.59644043 | -0.95150025 | -0.20704455 |
| H | -3.29766126 | -2.80941611 | 0.22602145  |

CP5

$\Delta G_{298K} = -263.122057$  A.U.

|   |             |             |             |
|---|-------------|-------------|-------------|
| C | 0.33104469  | 0.03516788  | 0.07354113  |
| C | 1.17244582  | -1.19685422 | 0.00546320  |
| O | 0.91582069  | 1.27722230  | 0.20948293  |
| H | 1.69370390  | -1.37130765 | 0.95311743  |
| H | 1.92797902  | -1.09795943 | -0.78176710 |
| H | 0.55581262  | -2.07196076 | -0.20962631 |
| H | 0.99177784  | 1.50286999  | 1.14553728  |
| N | -0.92553497 | 0.01548945  | -0.22200779 |
| N | -2.04646843 | -0.00480437 | -0.46677544 |

TS3

$\Delta G_{298K} = -263.103863$  A.U.

|       |             |             |             |
|-------|-------------|-------------|-------------|
| ----- |             |             |             |
| C     | 0.37918525  | 0.02760445  | 0.47252188  |
| C     | 1.20152857  | -1.12056598 | -0.05799520 |
| O     | 1.01439302  | 1.19488836  | 0.17565171  |
| H     | 2.00986568  | -1.27051399 | 0.66304713  |
| H     | 1.65516723  | -0.92402416 | -1.03762693 |
| H     | 0.61177347  | -2.03914734 | -0.09727552 |
| H     | 0.66132767  | 1.89360167  | 0.73907957  |
| N     | -1.00742523 | -0.01308962 | -0.40307919 |
| N     | -2.12110367 | 0.00602860  | -0.46845343 |
| ----- |             |             |             |

#### CP6

$\Delta G_{298K} = -263.151063$  A.U.

|       |             |             |             |
|-------|-------------|-------------|-------------|
| ----- |             |             |             |
| C     | 0.91804856  | 0.08556793  | 0.79327605  |
| C     | 1.49990596  | -1.05108294 | 0.01441135  |
| O     | 1.34053464  | 1.19896461  | 0.23531702  |
| H     | 2.18289175  | -1.57370434 | 0.69689407  |
| H     | 2.03237732  | -0.76248583 | -0.89976563 |
| H     | 0.70311370  | -1.76808540 | -0.20648664 |
| H     | 0.99065947  | 1.95066367  | 0.73321630  |
| N     | -1.74880344 | -0.16385992 | -0.85060506 |
| N     | -2.73773524 | -0.02883713 | -0.39191275 |
| ----- |             |             |             |

#### CP7

$\Delta G_{298K} = -379.732311$  A.U.

|       |           |           |           |
|-------|-----------|-----------|-----------|
| ----- |           |           |           |
| C     | -2.700252 | 0.307634  | -0.444338 |
| O     | -2.267944 | -0.930486 | -0.580845 |
| H     | -2.394340 | -1.198314 | -1.501106 |
| N     | 0.567262  | 0.479625  | -0.429354 |
| C     | 1.819155  | 1.039180  | -0.514222 |
| C     | 0.738457  | -0.673242 | 0.172826  |
| C     | 2.756054  | 0.210045  | 0.046041  |
| H     | 1.974707  | 2.004911  | -0.971931 |
| H     | -0.045337 | -1.382594 | 0.401273  |
| H     | 3.823941  | 0.294821  | 0.169423  |
| H     | 2.426175  | -1.696121 | 0.946193  |
| N     | 2.047860  | -0.885146 | 0.482522  |
| C     | -2.431537 | 0.722534  | 0.964187  |
| H     | -3.296300 | 1.263691  | 1.357667  |
| H     | -2.130886 | -0.090124 | 1.639094  |
| H     | -1.611533 | 1.449363  | 0.887006  |
| ----- |           |           |           |

#### TS4

$\Delta G_{298K} = -379.718766$  A.U.

$\text{ImagF} = -200.9603 \text{ cm}^{-1}$

|       |             |             |             |
|-------|-------------|-------------|-------------|
| ----- |             |             |             |
| C     | -1.55639674 | 0.03093230  | 0.62318828  |
| O     | -0.52821316 | 0.88384914  | 0.33578899  |
| H     | -0.08803771 | 1.08880727  | 1.16782989  |
| N     | -0.57398855 | -1.71483425 | 0.20328627  |
| C     | -0.85328693 | -2.98610882 | 0.62442912  |
| C     | 0.56854109  | -1.75894918 | -0.43585703 |
| C     | 0.15081202  | -3.82607477 | 0.22189133  |
| H     | -1.74561401 | -3.20430495 | 1.19181107  |
| H     | 1.06183123  | -0.90728107 | -0.88371769 |
| ----- |             |             |             |

|       |             |             |             |
|-------|-------------|-------------|-------------|
| H     | 0.30739324  | -4.88453597 | 0.35463721  |
| H     | 1.91480864  | -3.33049278 | -0.87193304 |
| N     | 1.04928547  | -3.02863545 | -0.45156682 |
| C     | -2.40252142 | -0.01399527 | -0.63127150 |
| H     | -3.07431099 | 0.85138463  | -0.56797823 |
| H     | -1.82951260 | 0.06650457  | -1.56781843 |
| H     | -3.02120098 | -0.91384559 | -0.64889277 |
| ----- |             |             |             |

#### CP8

$\Delta G_{298K} = -379.733023$  A.U.

|       |           |           |           |
|-------|-----------|-----------|-----------|
| ----- |           |           |           |
| C     | -1.379127 | 0.043628  | -0.440293 |
| O     | -1.836753 | -1.238015 | -0.016569 |
| H     | -2.297156 | -1.629439 | -0.762856 |
| N     | 0.025163  | 0.030855  | -0.174976 |
| C     | 0.878025  | 1.124984  | -0.256768 |
| C     | 0.765336  | -1.038144 | 0.135397  |
| C     | 2.149774  | 0.692041  | -0.026816 |
| H     | 0.509518  | 2.102651  | -0.515105 |
| H     | 0.376823  | -2.030276 | 0.271797  |
| H     | 3.082165  | 1.232196  | -0.018224 |
| H     | 2.846021  | -1.272358 | 0.385693  |
| N     | 2.073384  | -0.653697 | 0.202548  |
| C     | -2.047197 | 1.121086  | 0.386926  |
| H     | -3.122800 | 1.095473  | 0.199621  |
| H     | -1.887730 | 0.980747  | 1.474171  |
| H     | -1.703508 | 2.123451  | 0.113777  |
| ----- |           |           |           |

#### CP9

$\Delta G_{298K} = -379.822156$  A.U.

|       |           |           |           |
|-------|-----------|-----------|-----------|
| ----- |           |           |           |
| C     | -1.316962 | 0.353200  | -0.244048 |
| H     | -1.431768 | 1.300509  | -0.787701 |
| C     | -1.989737 | 0.436127  | 1.112377  |
| H     | -1.869108 | -0.513025 | 1.640603  |
| H     | -1.540893 | 1.235613  | 1.705537  |
| H     | -3.055690 | 0.632553  | 0.981046  |
| O     | -1.909581 | -0.709393 | -0.941160 |
| H     | -1.497103 | -0.791214 | -1.810064 |
| N     | 0.124169  | 0.142720  | -0.124594 |
| C     | 1.117236  | 1.055450  | -0.400457 |
| C     | 0.743285  | -0.979758 | 0.344804  |
| C     | 2.293101  | 0.424812  | -0.084307 |
| H     | 0.897164  | 2.039811  | -0.785509 |
| H     | 0.185864  | -1.862350 | 0.626577  |
| H     | 3.297896  | 0.812067  | -0.167389 |
| N     | 2.048509  | -0.845263 | 0.375446  |
| ----- |           |           |           |

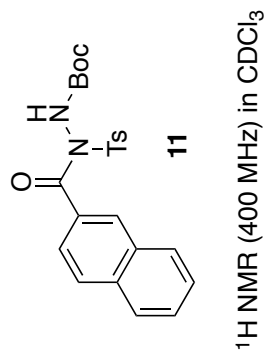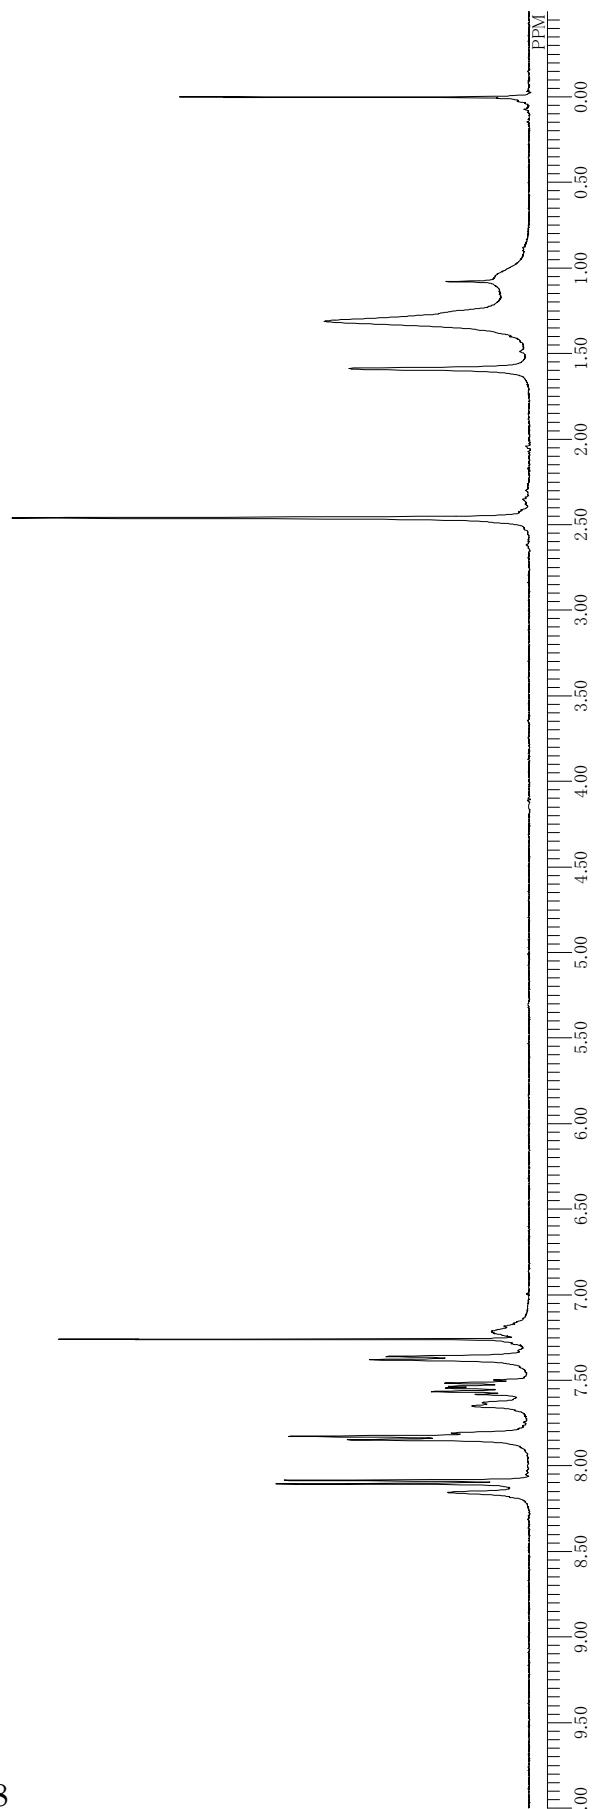

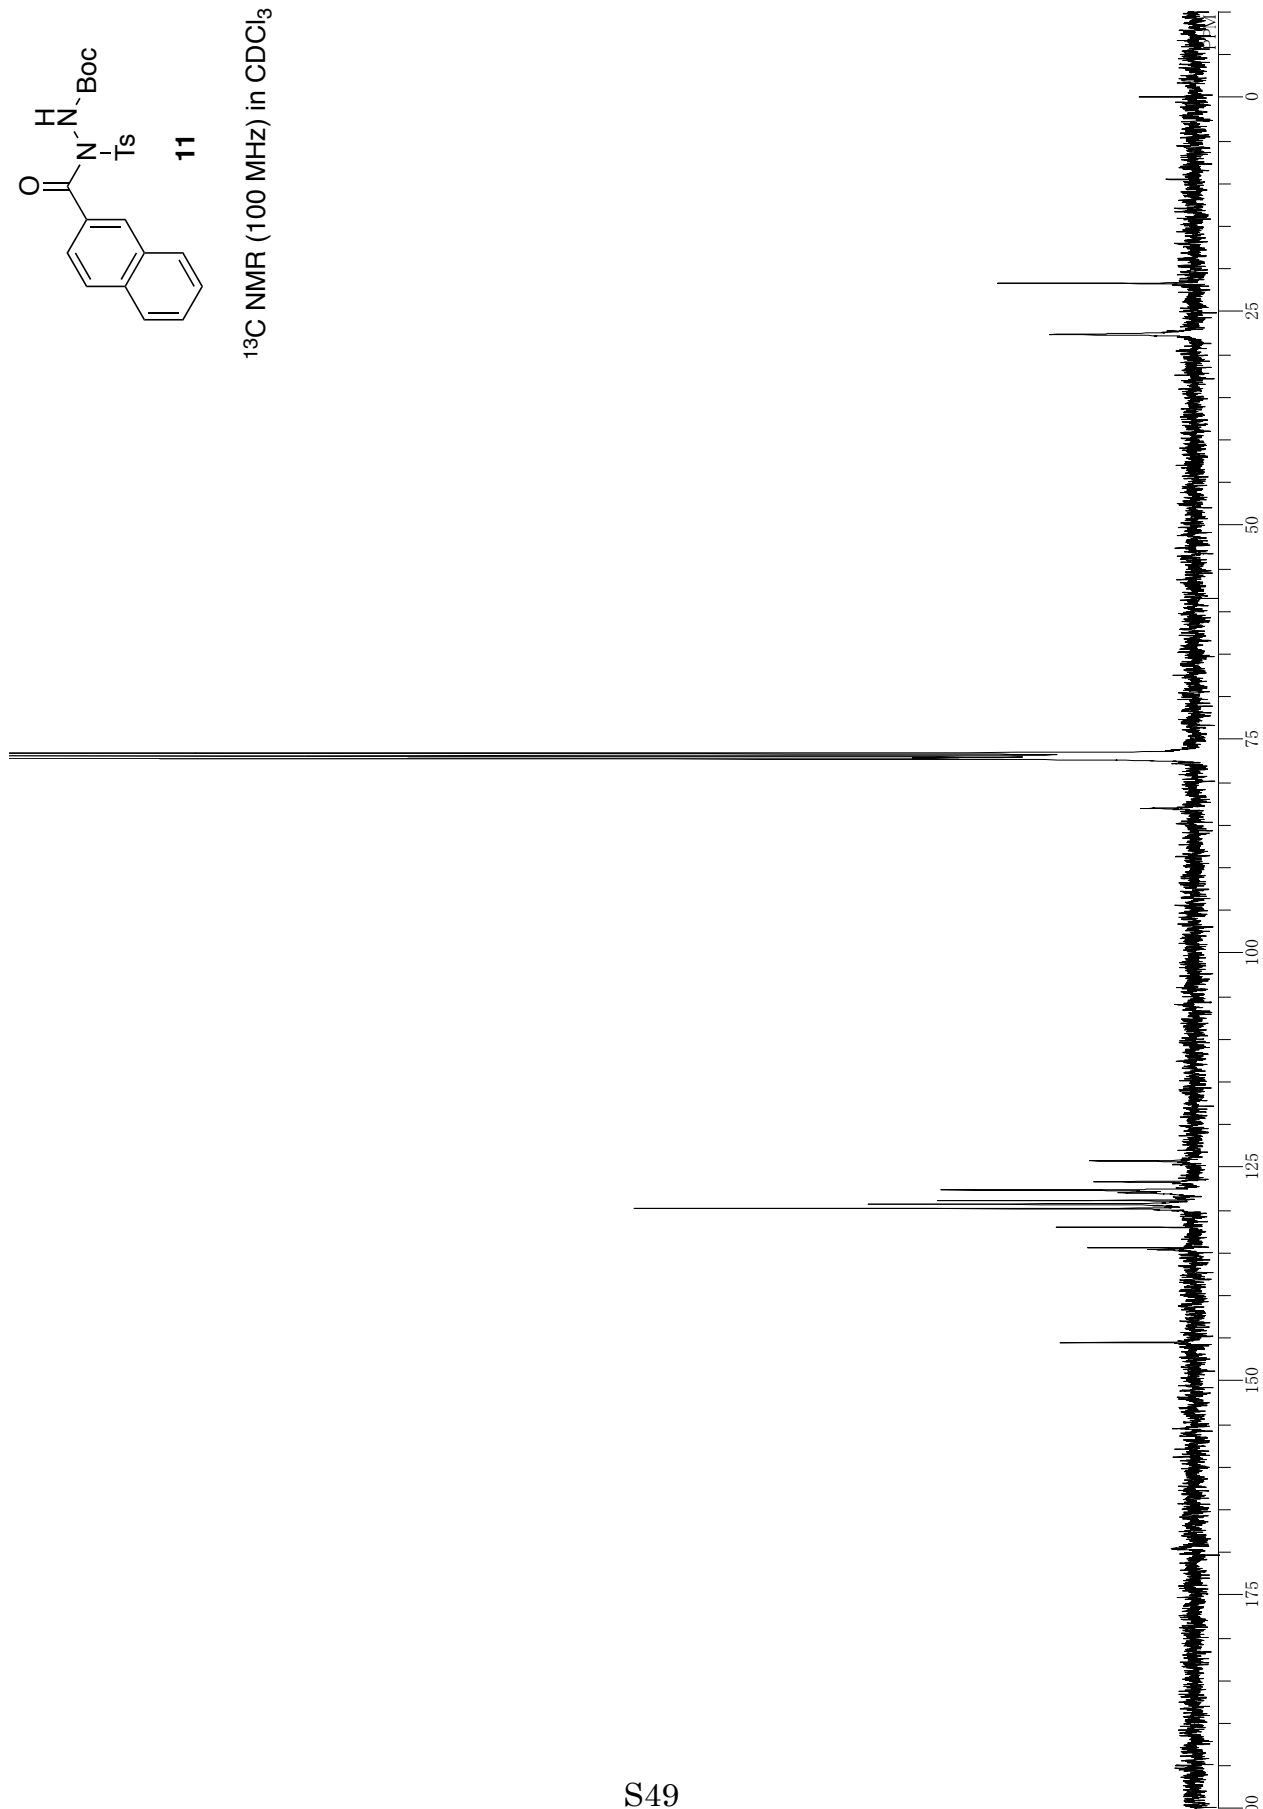

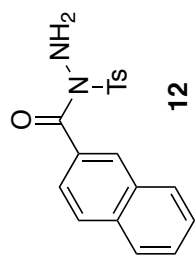

**12**

<sup>1</sup>H NMR (400 MHz) in CDCl<sub>3</sub>

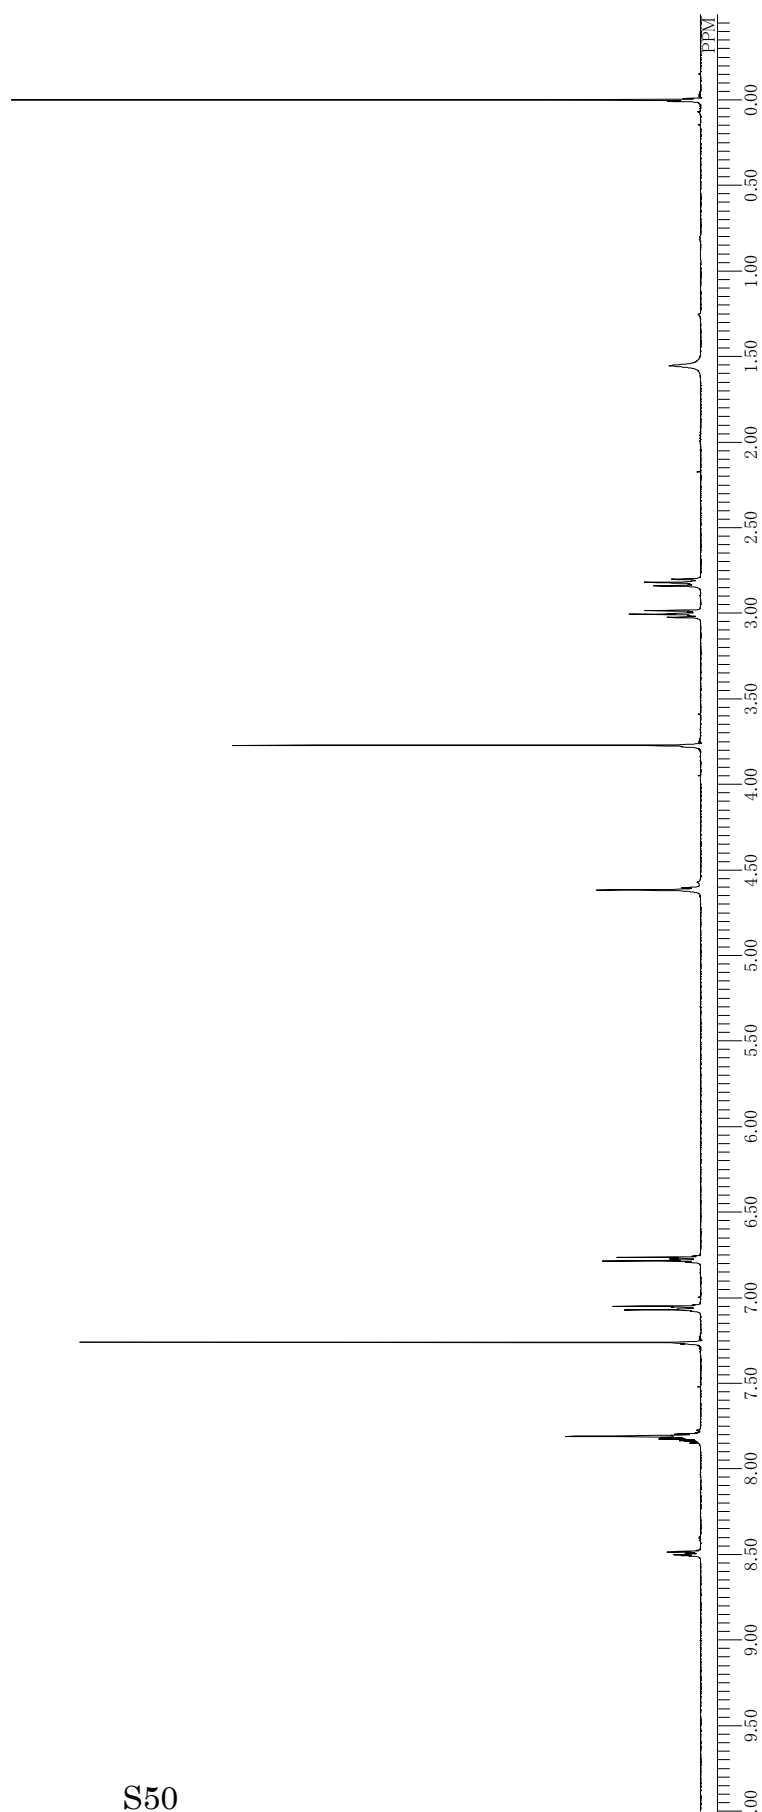

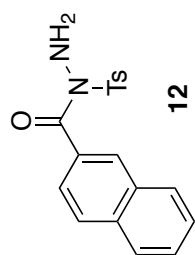

$^{13}\text{C}$  NMR (100 MHz) in  $\text{CDCl}_3$

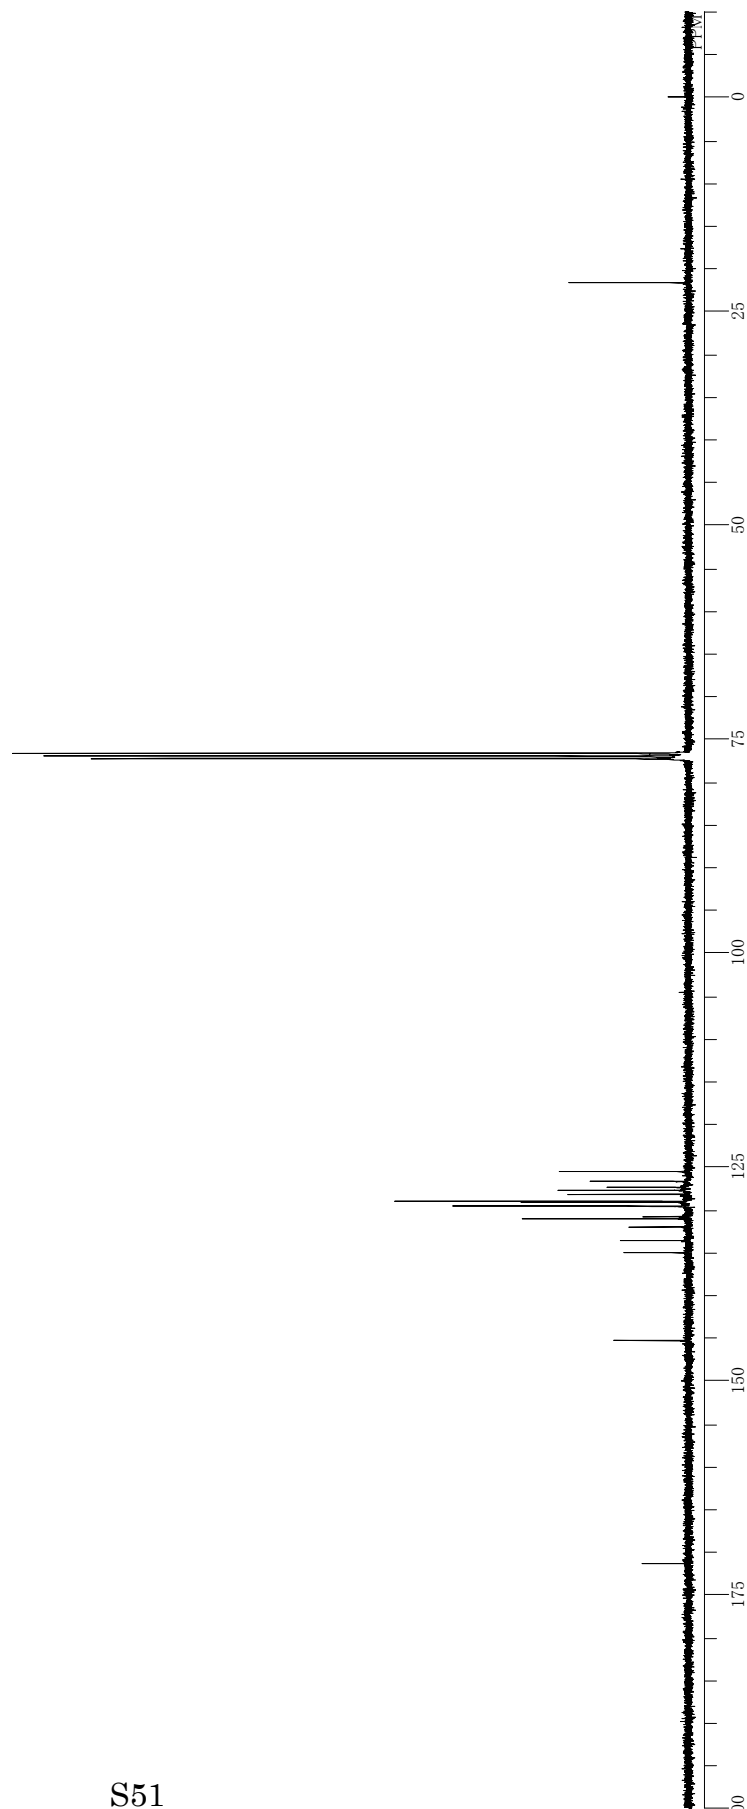

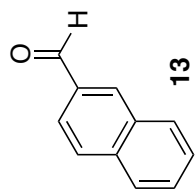

<sup>1</sup>H NMR (400 MHz) in CDCl<sub>3</sub>

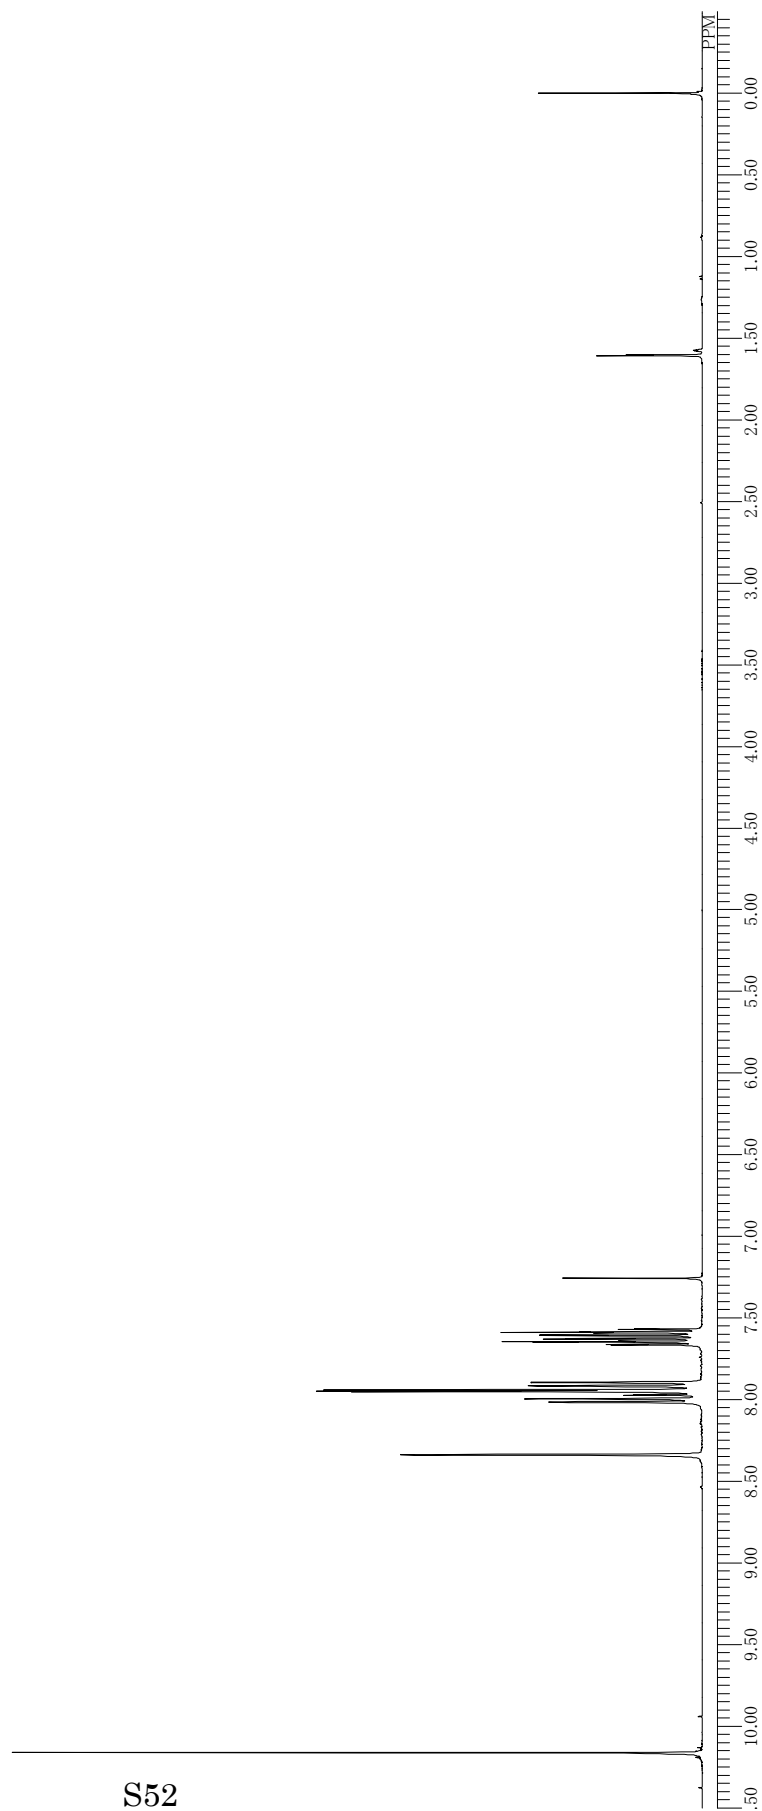



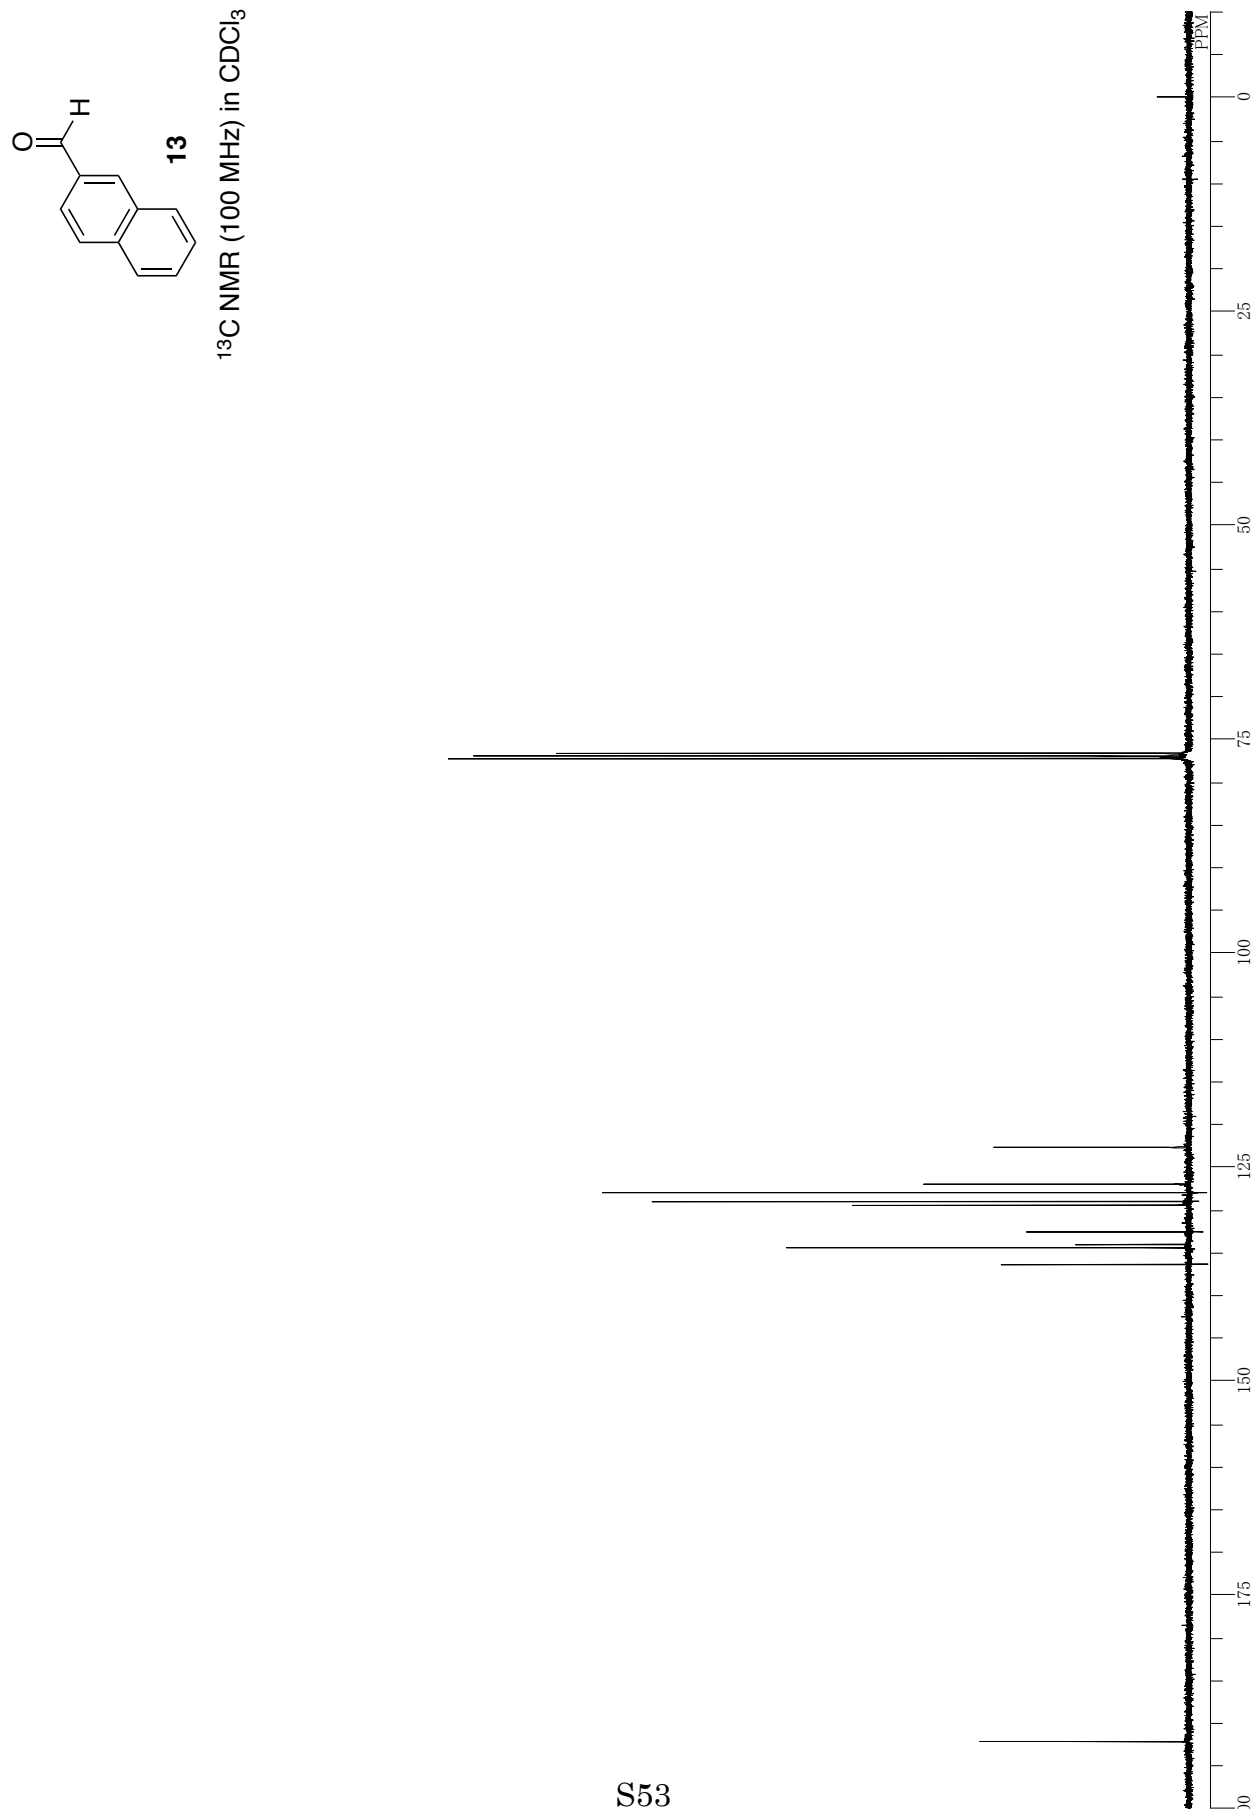

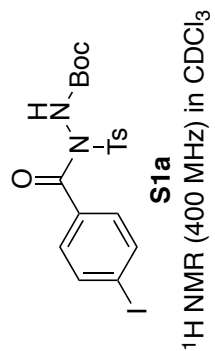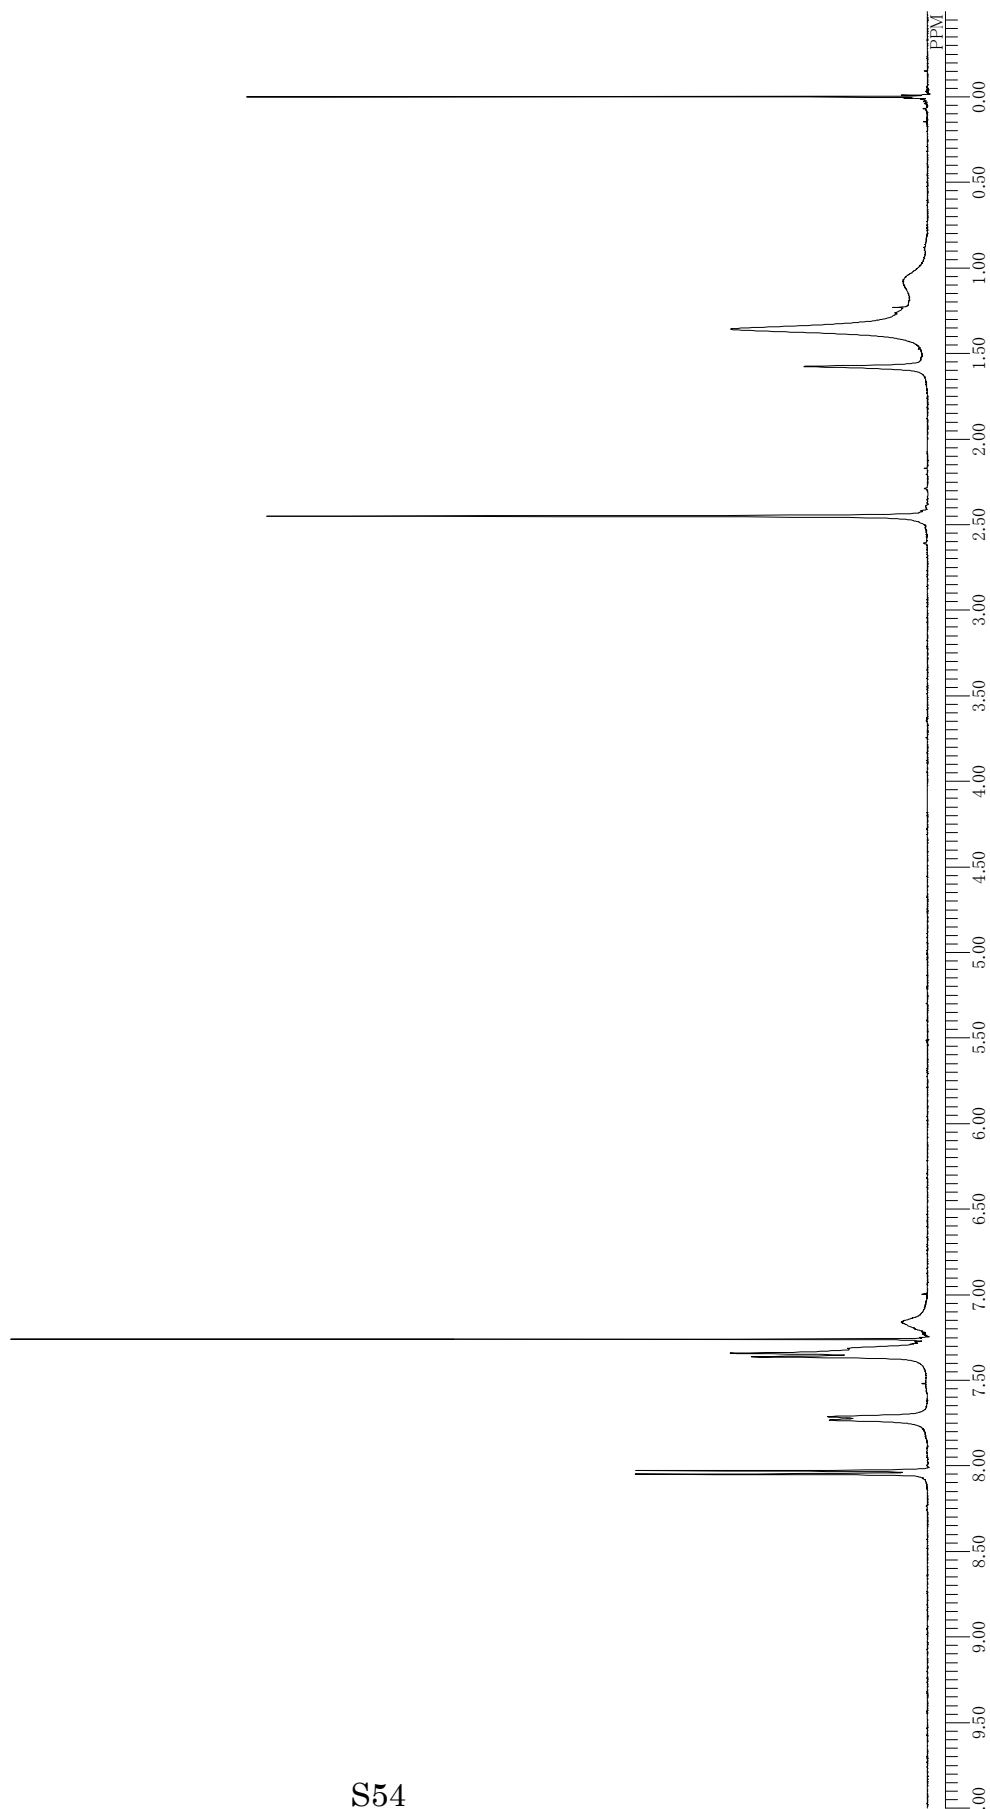

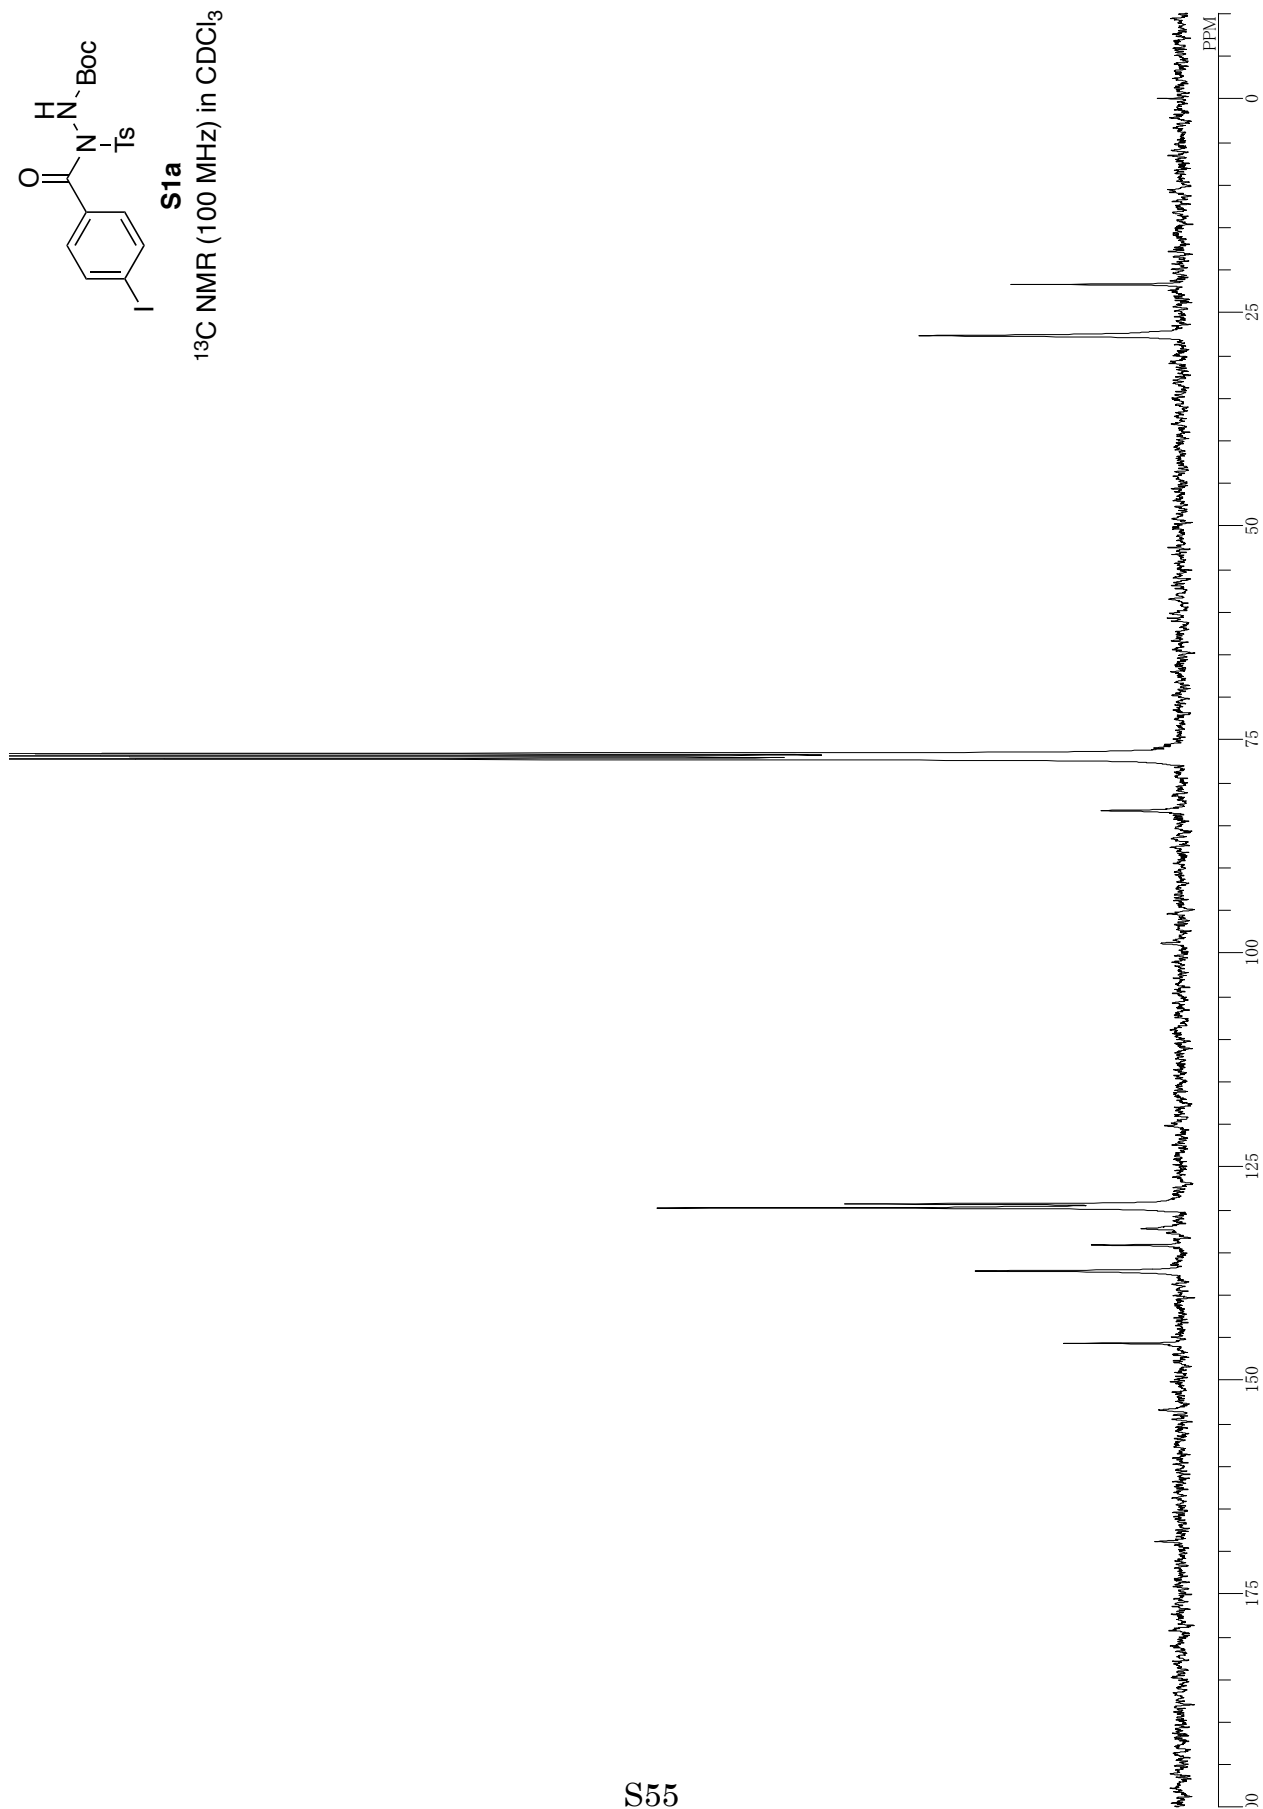

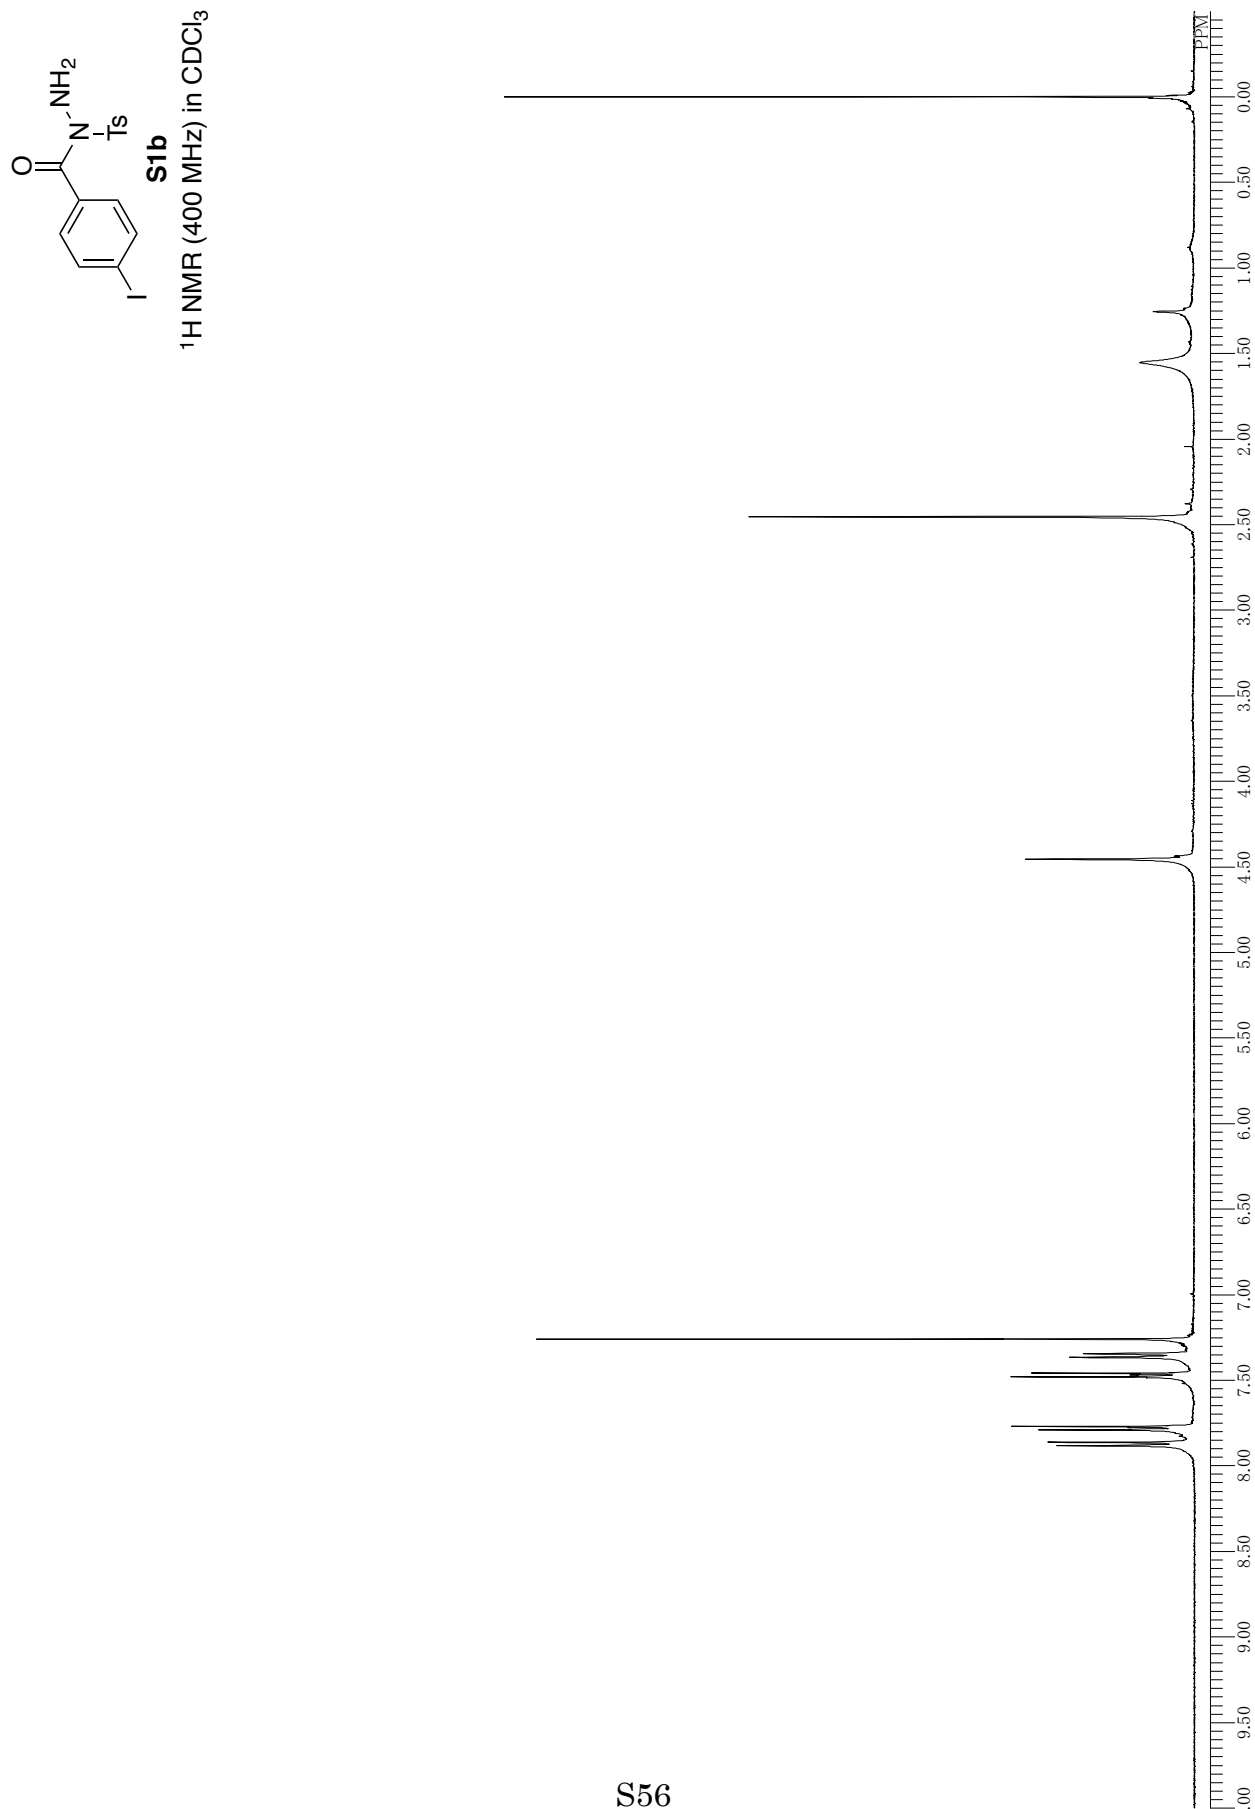

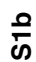 $^{13}\text{C}$  NMR (100 MHz) in  $\text{CDCl}_3$ 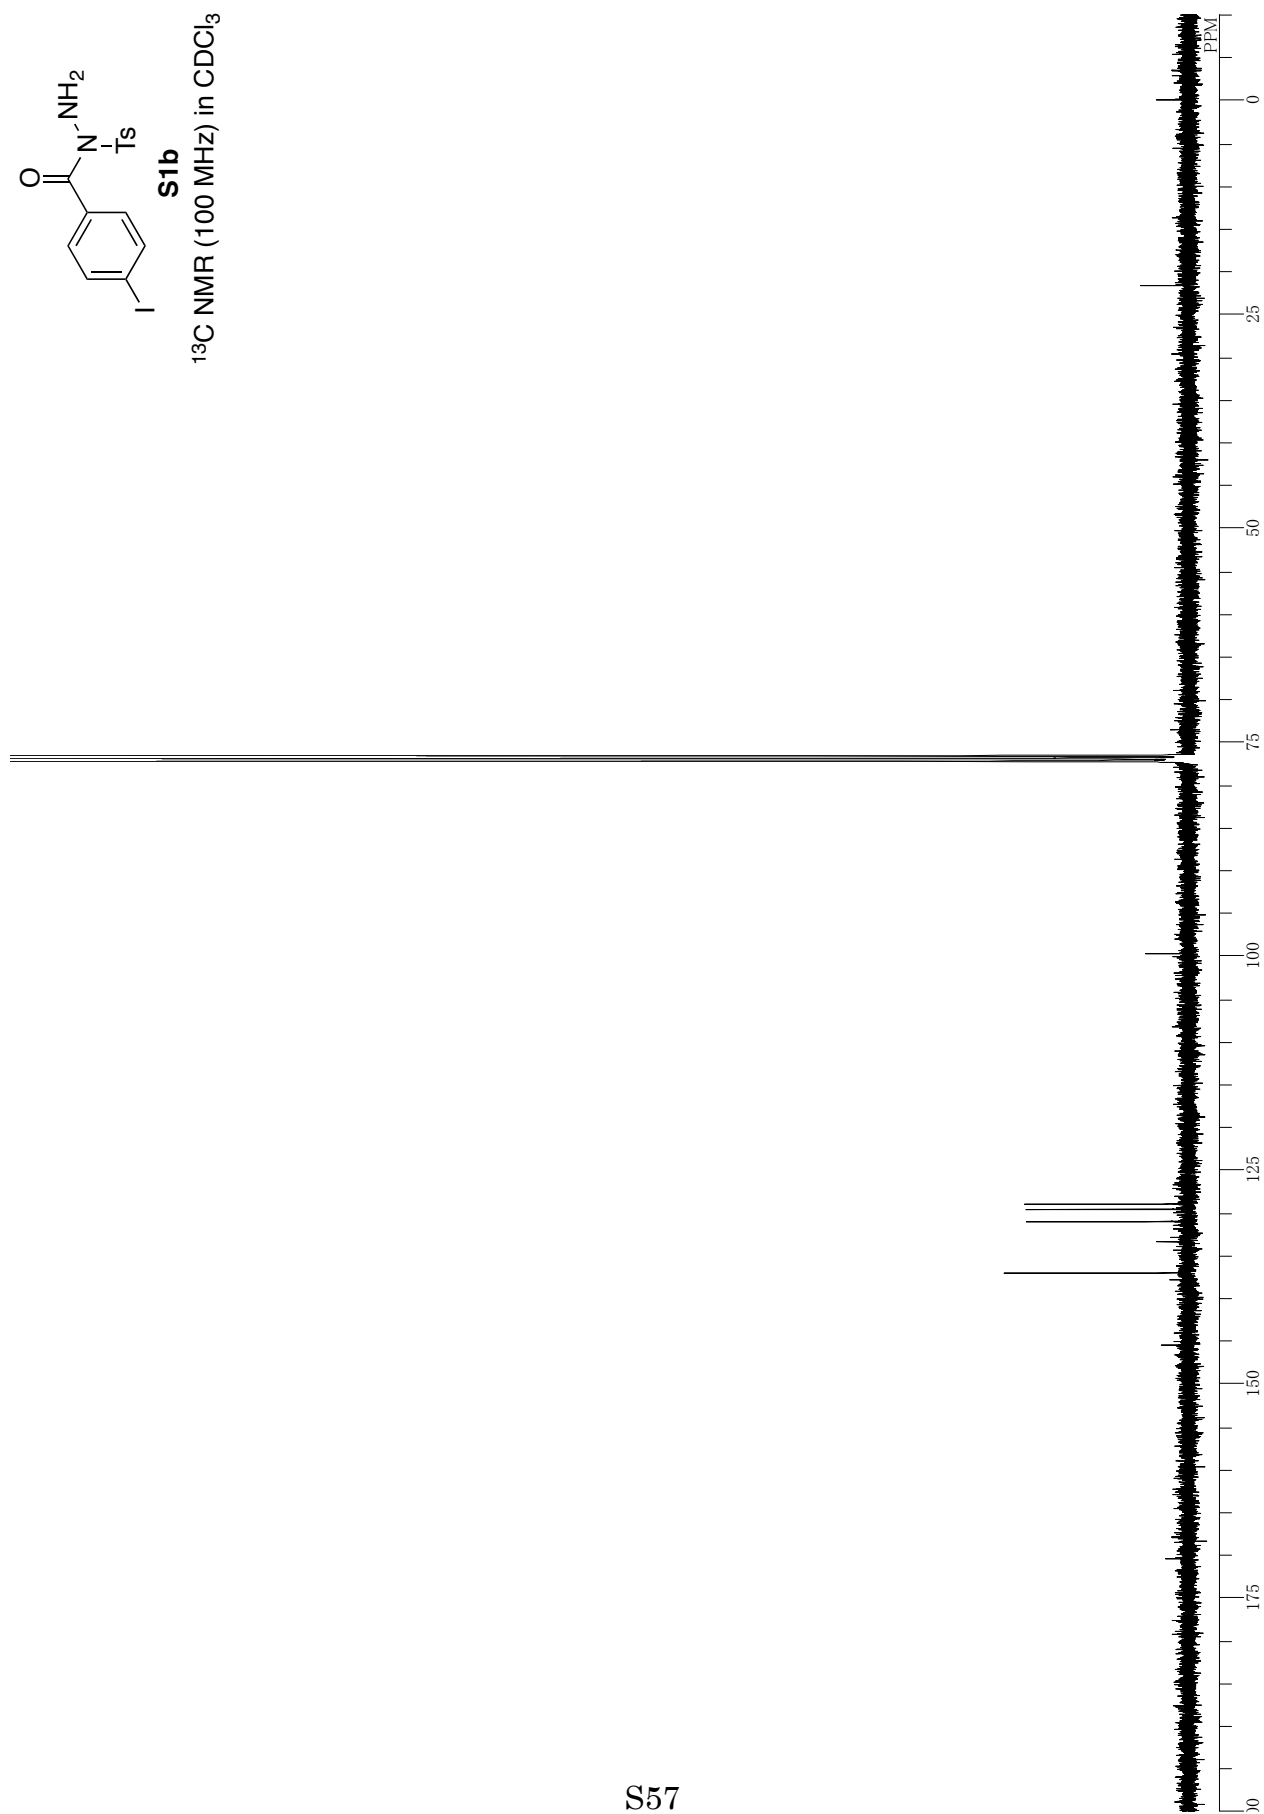

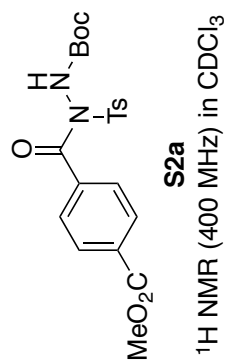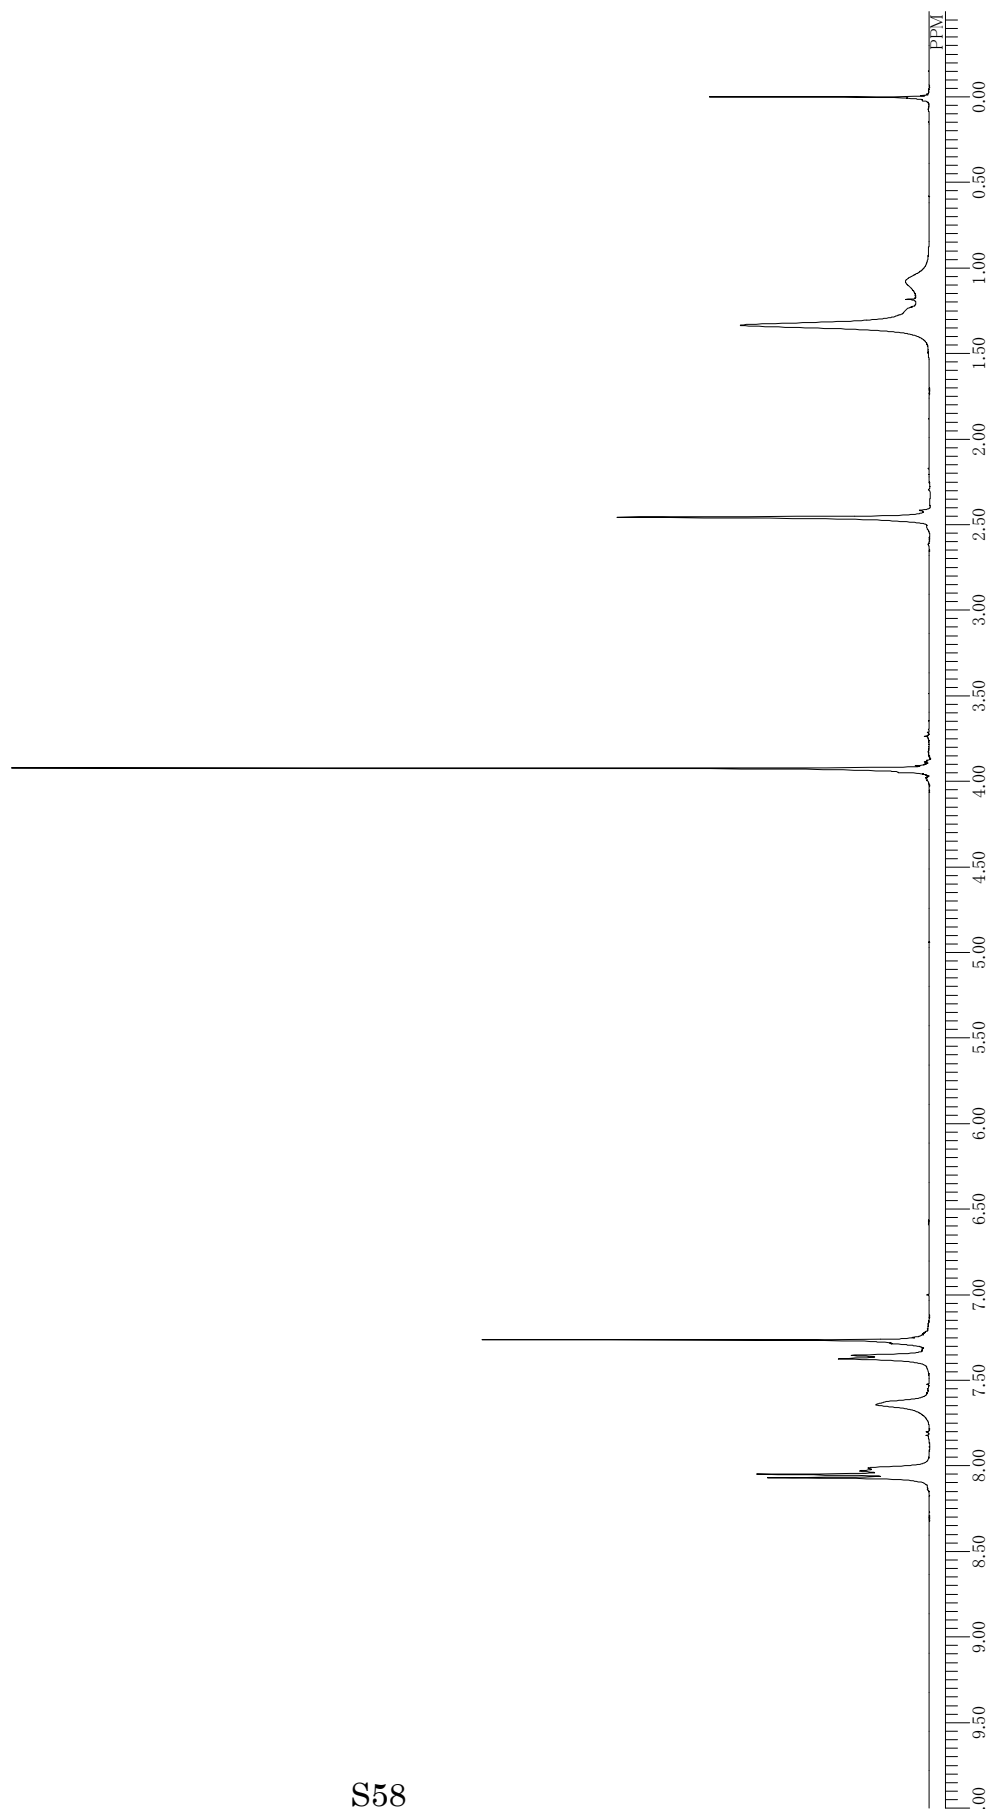

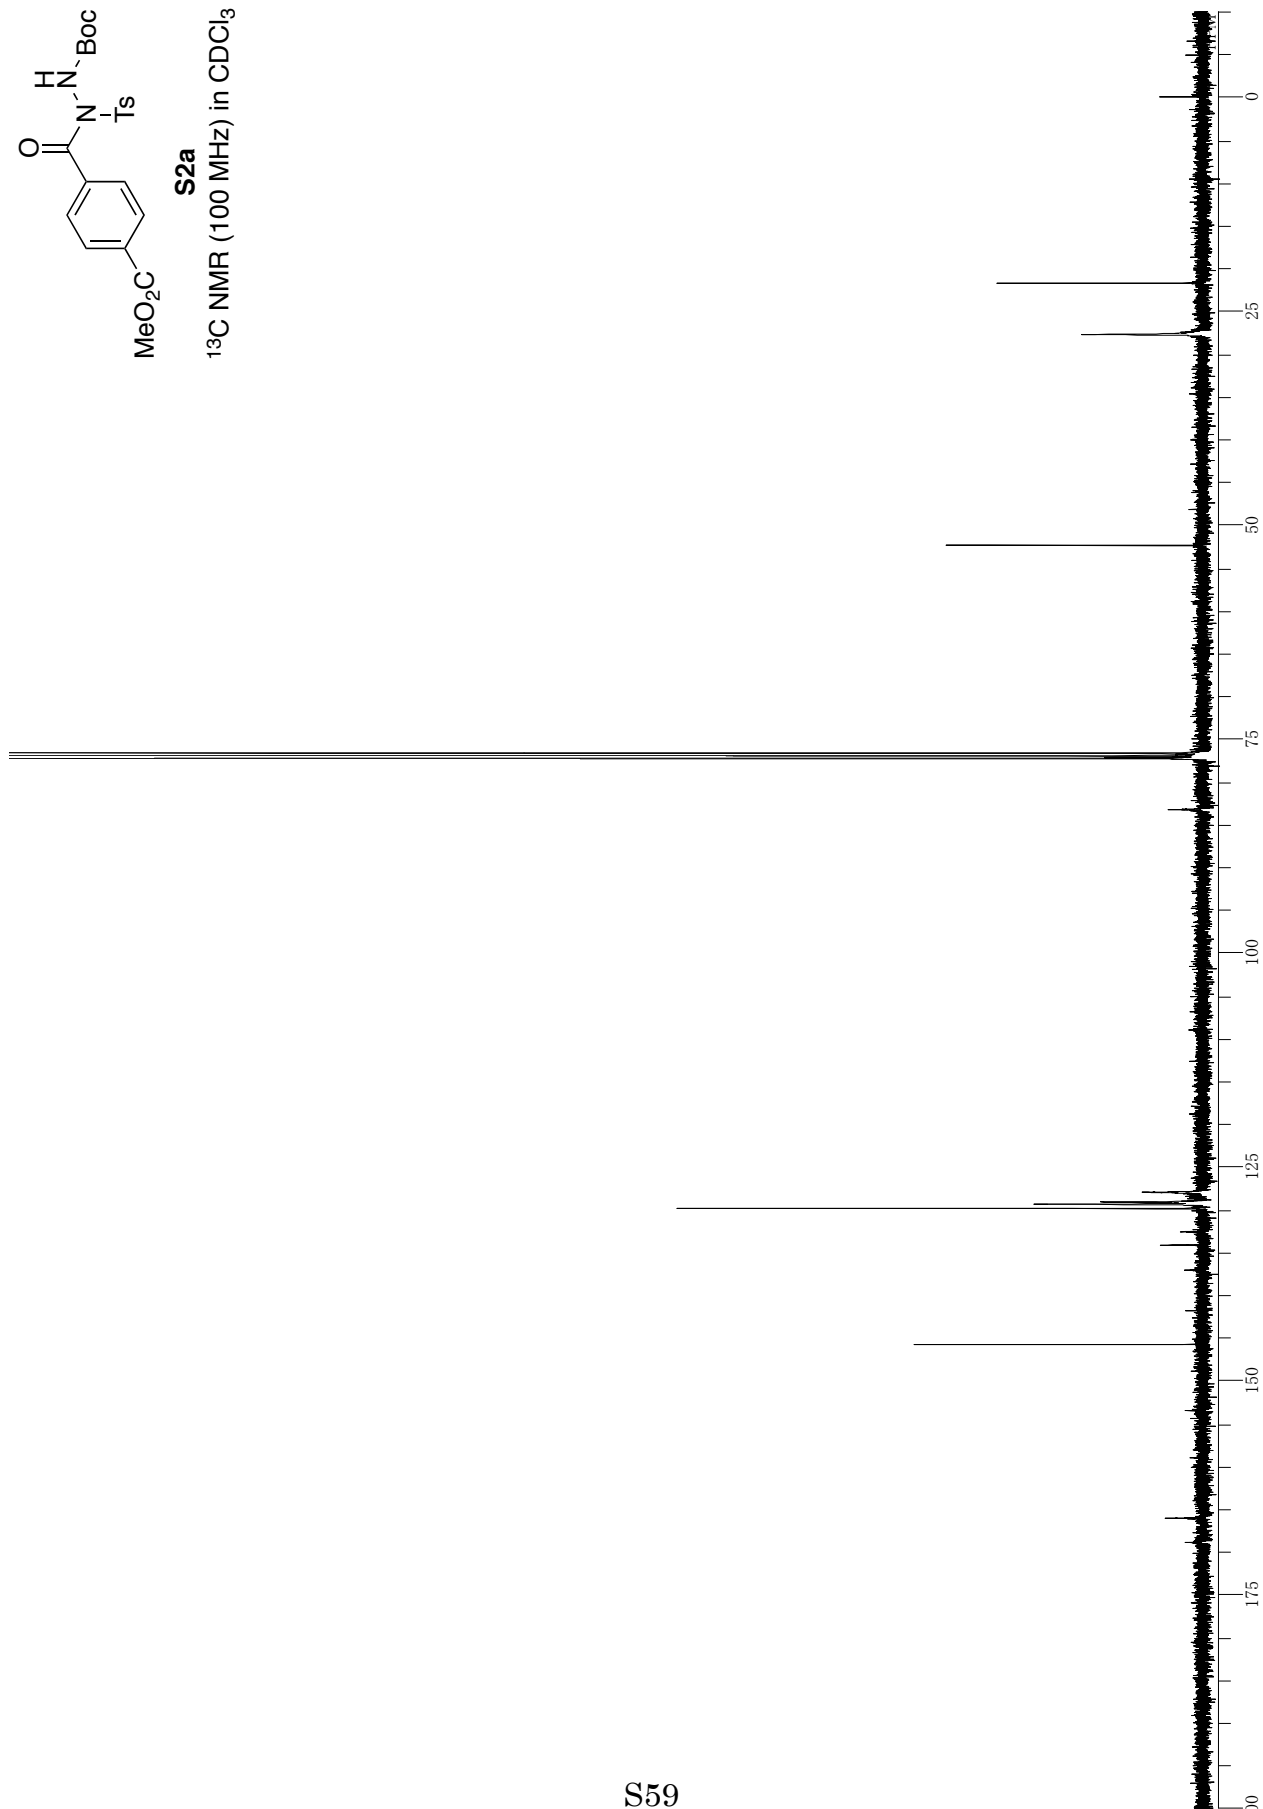

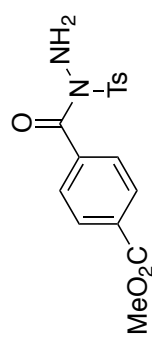

**S2b**  
<sup>1</sup>H NMR (400 MHz) in CDCl<sub>3</sub>

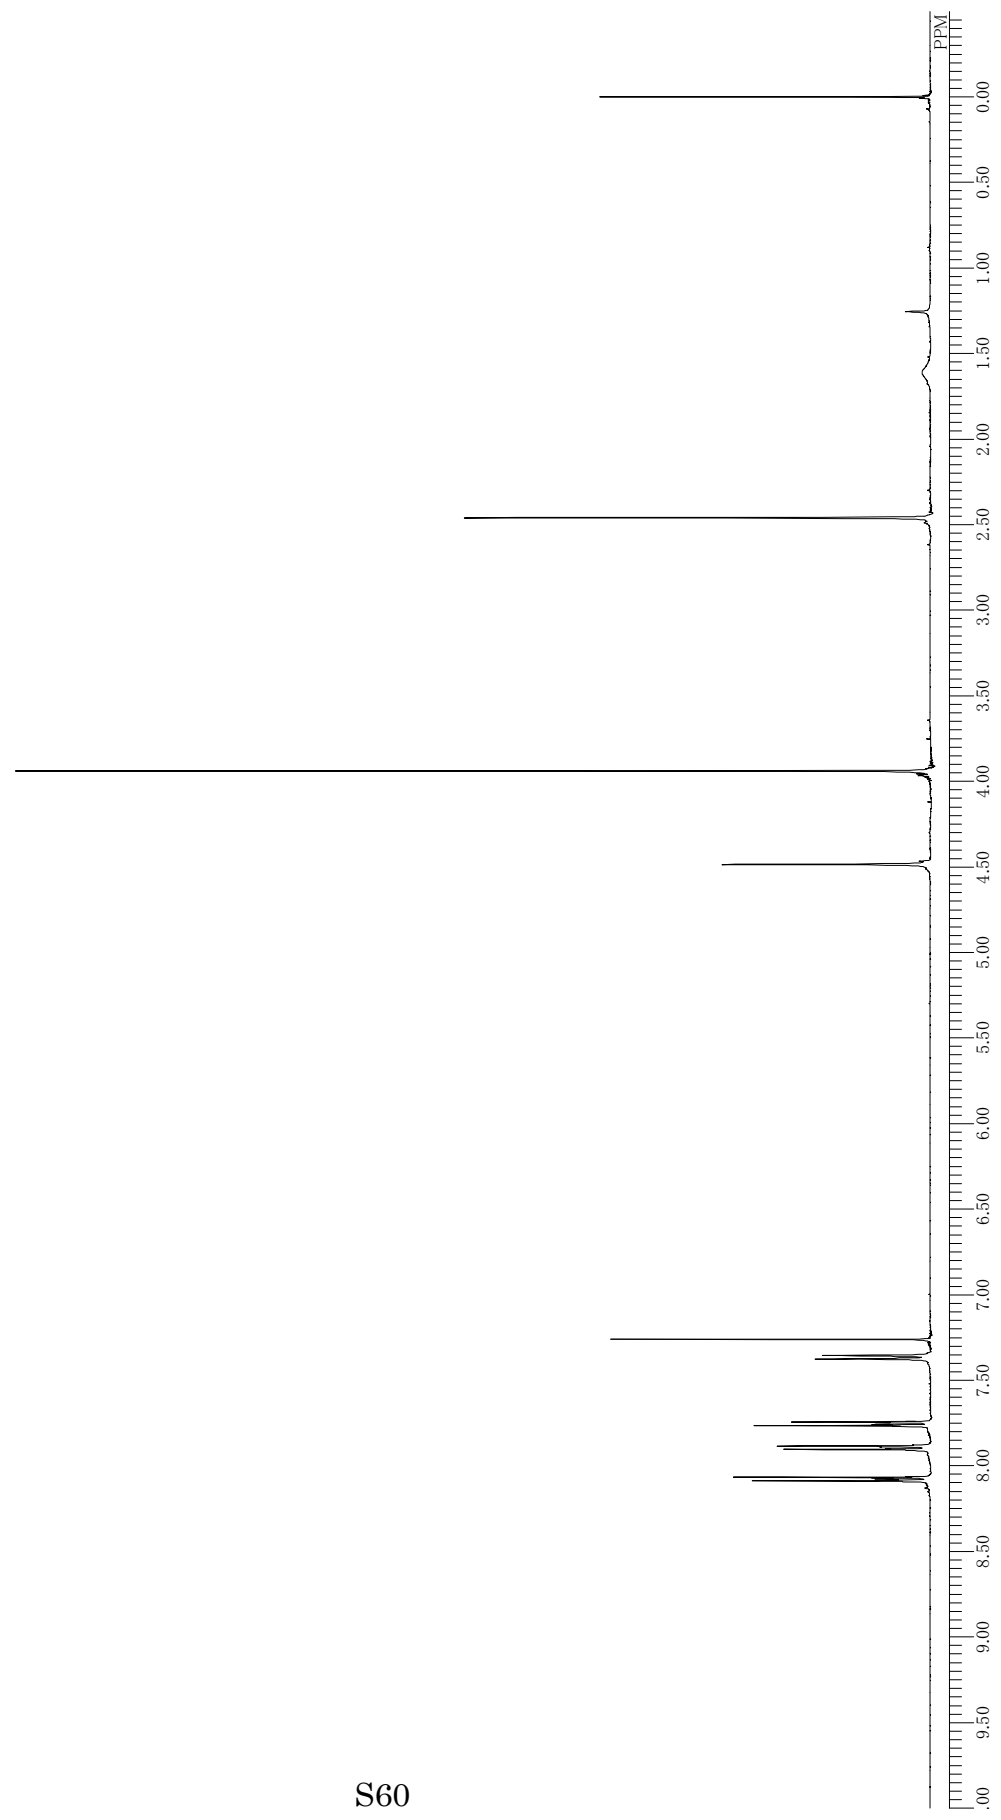



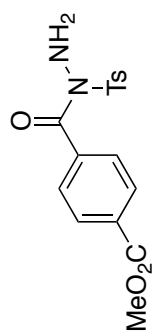

**S2b**

<sup>13</sup>C NMR (100 MHz) in CDCl<sub>3</sub>

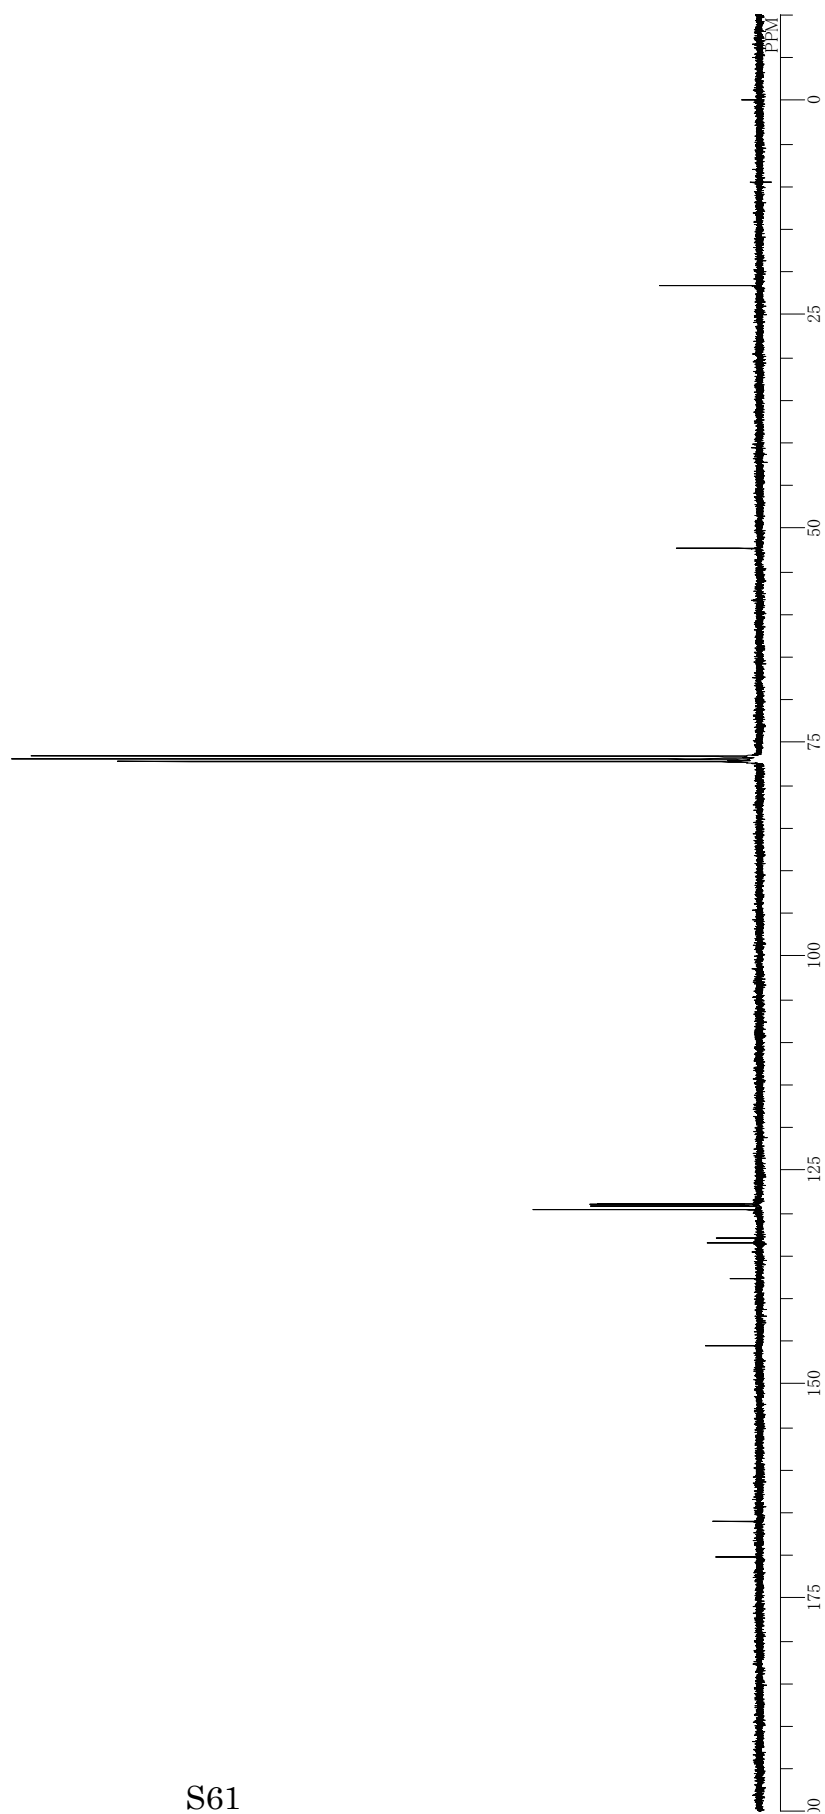

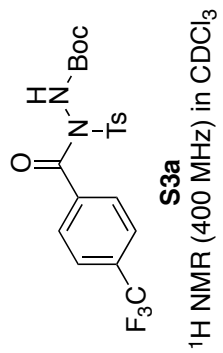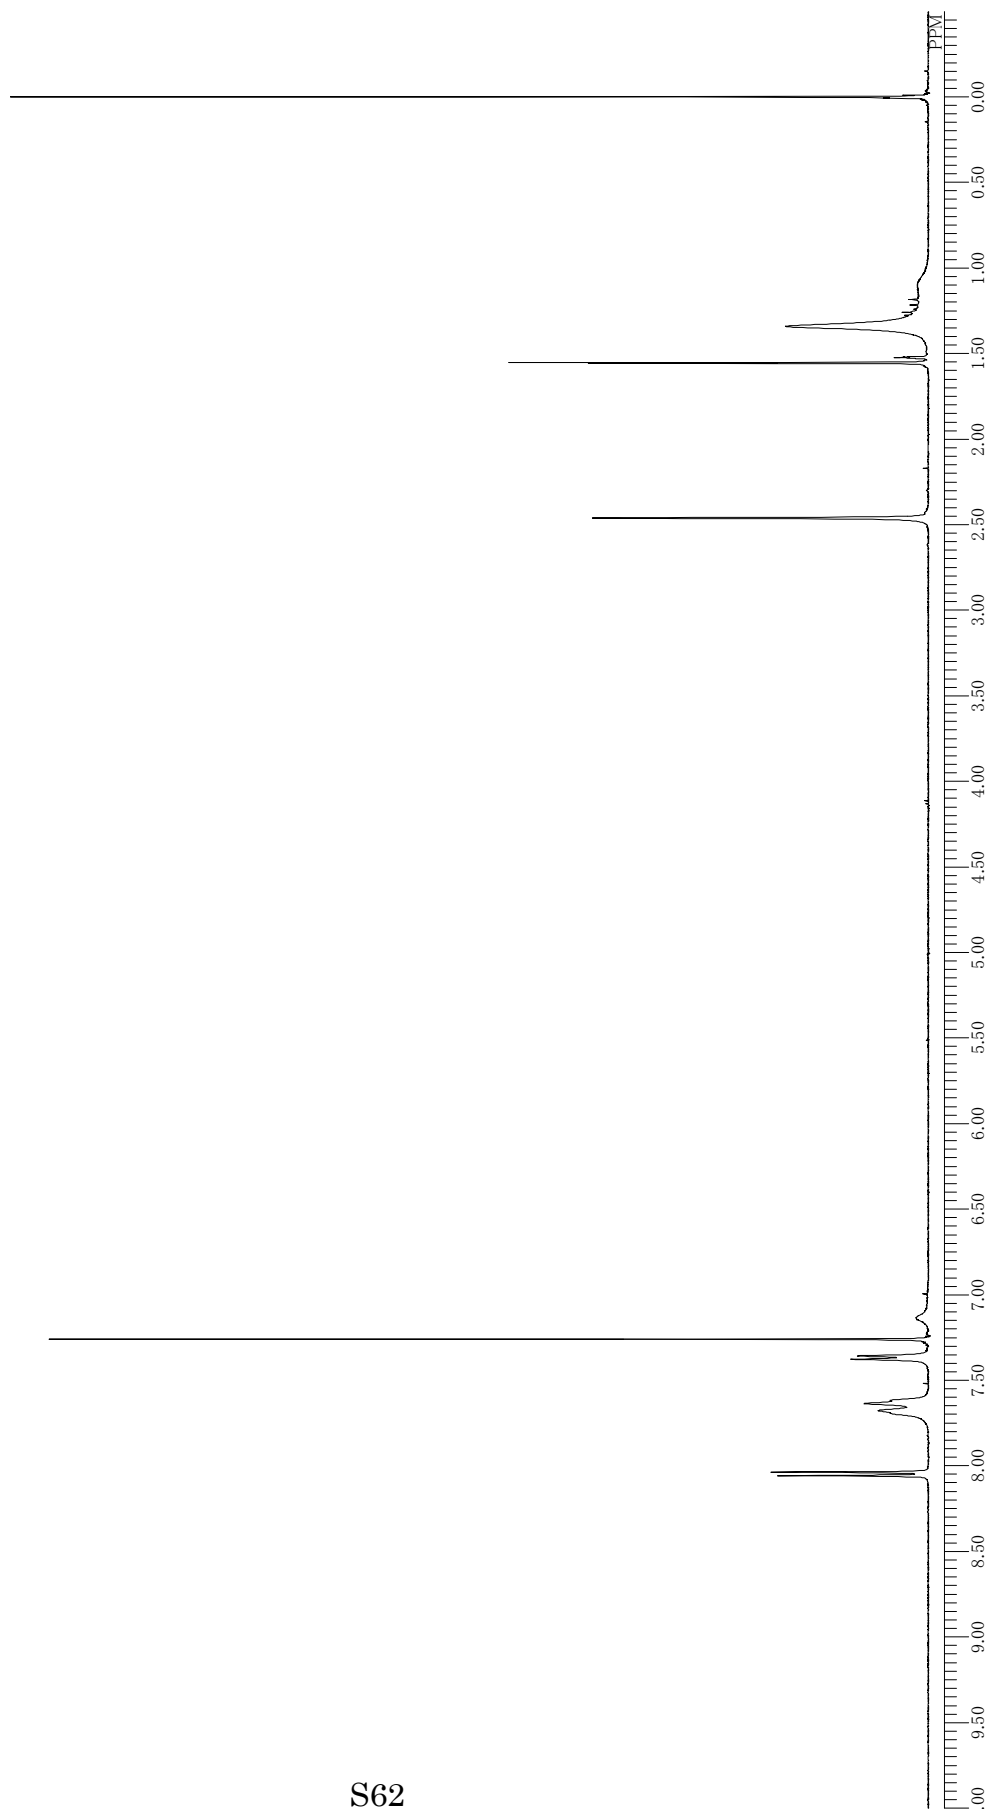

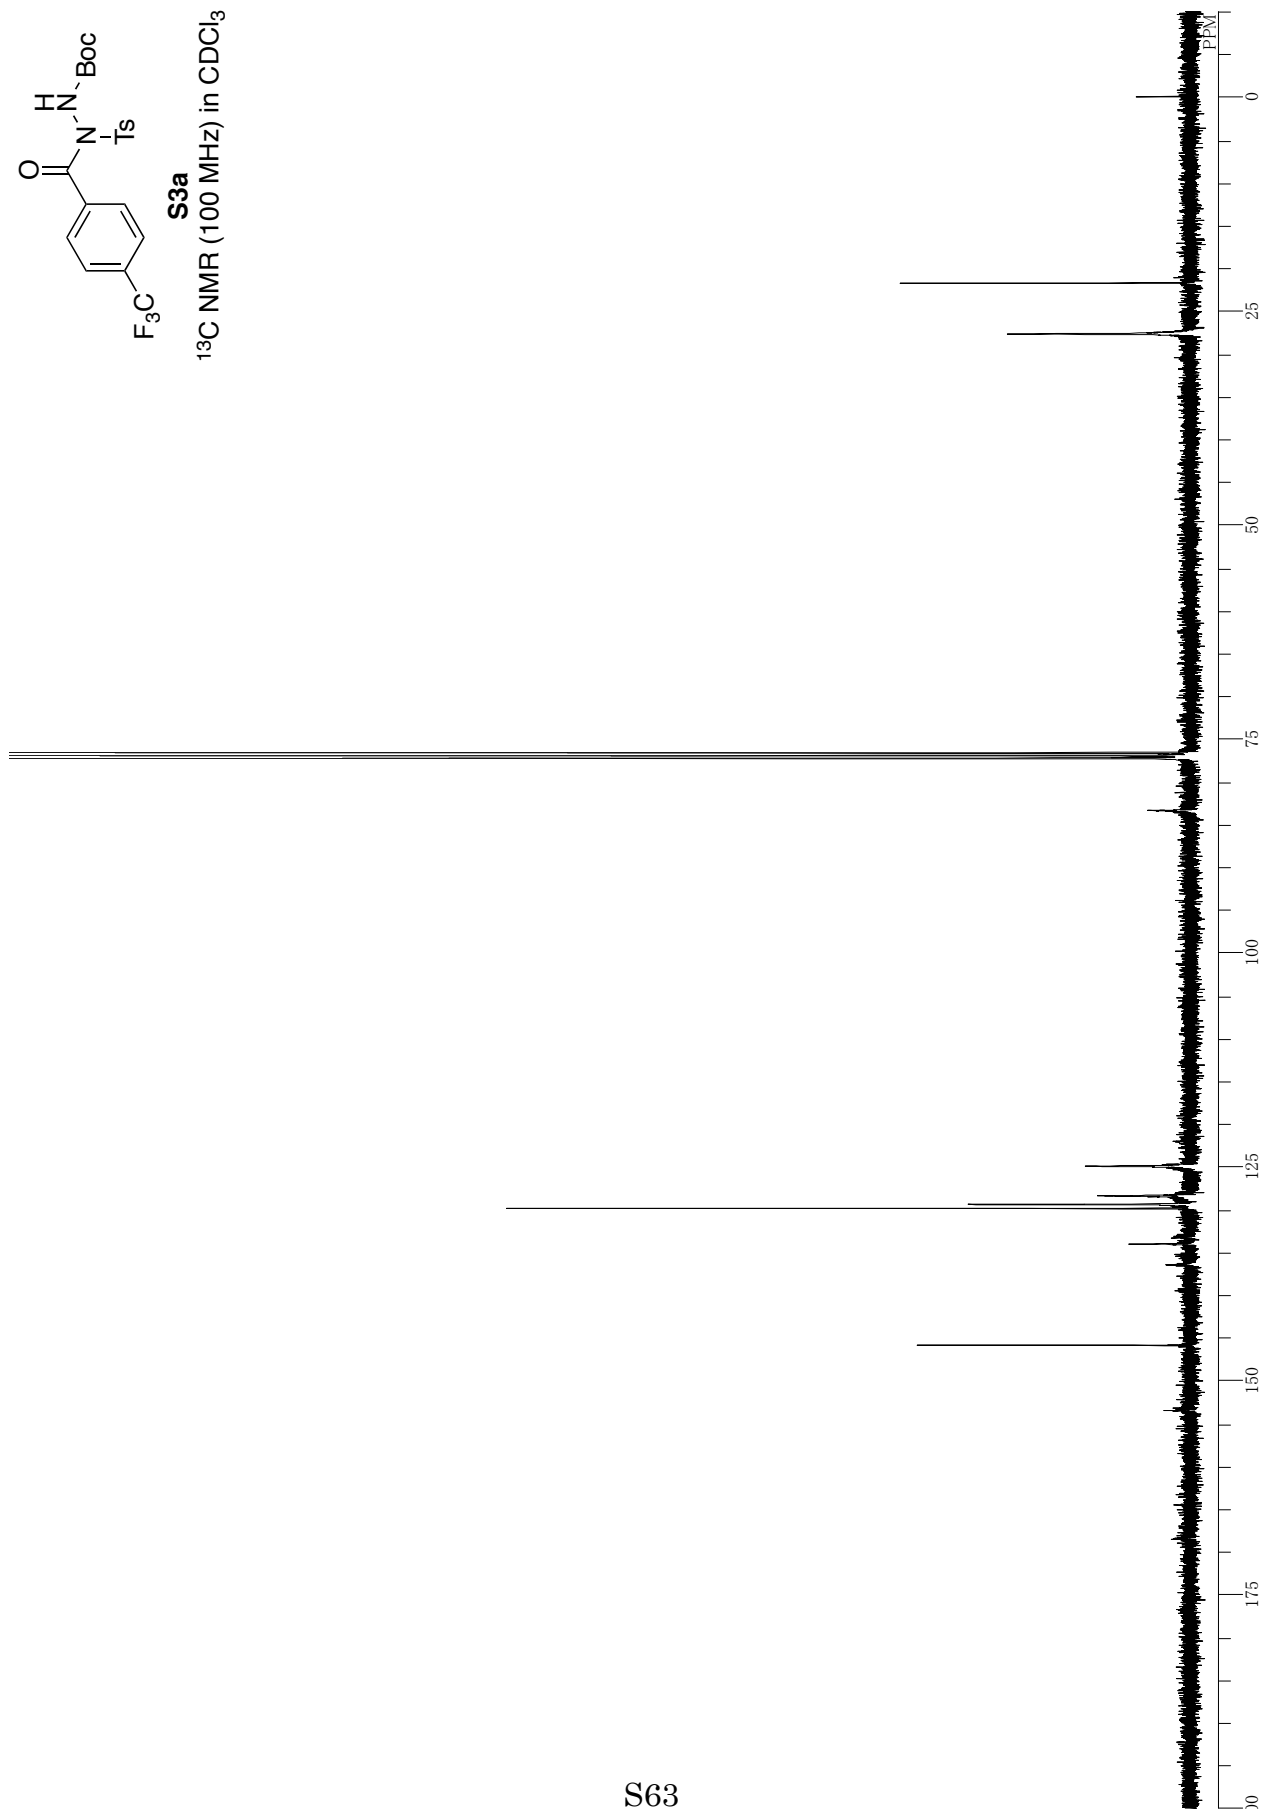

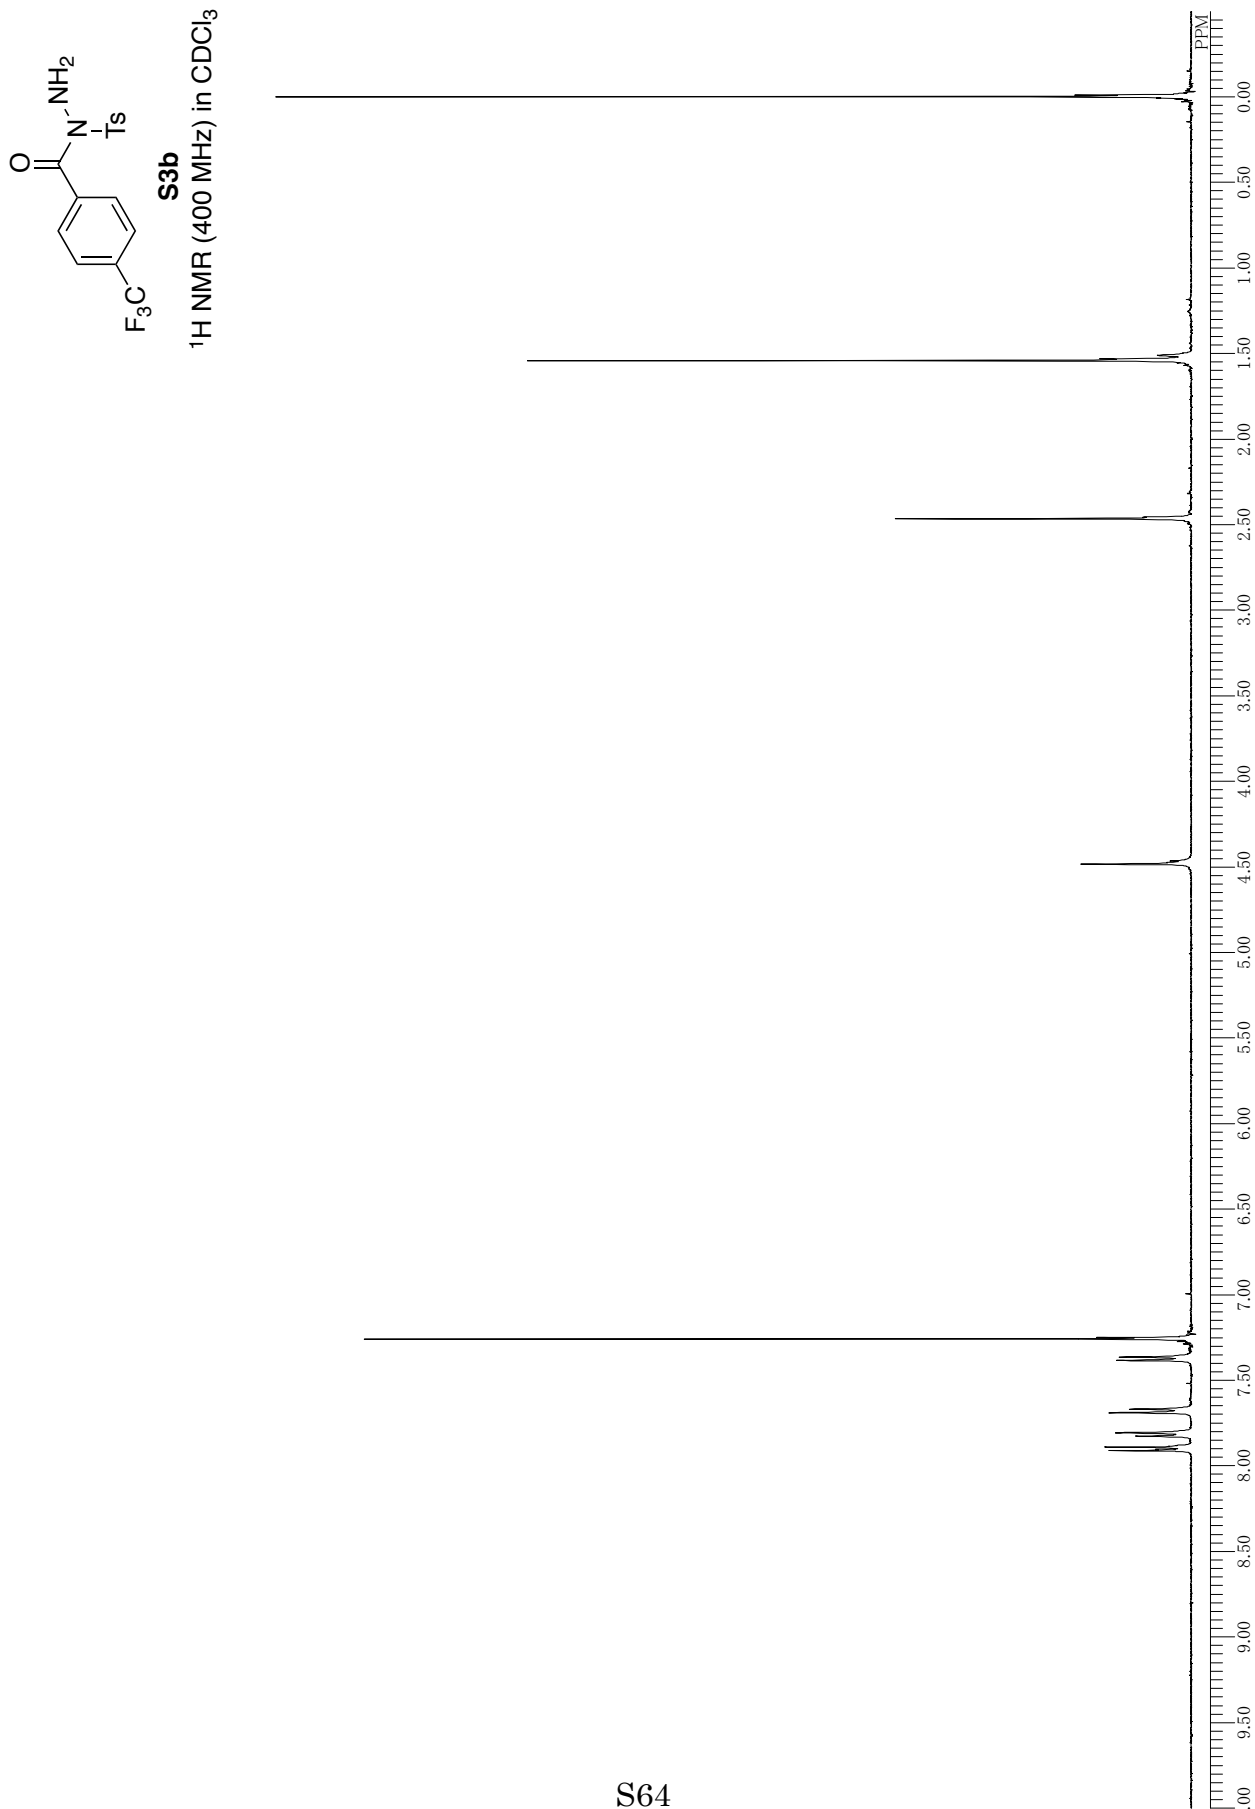

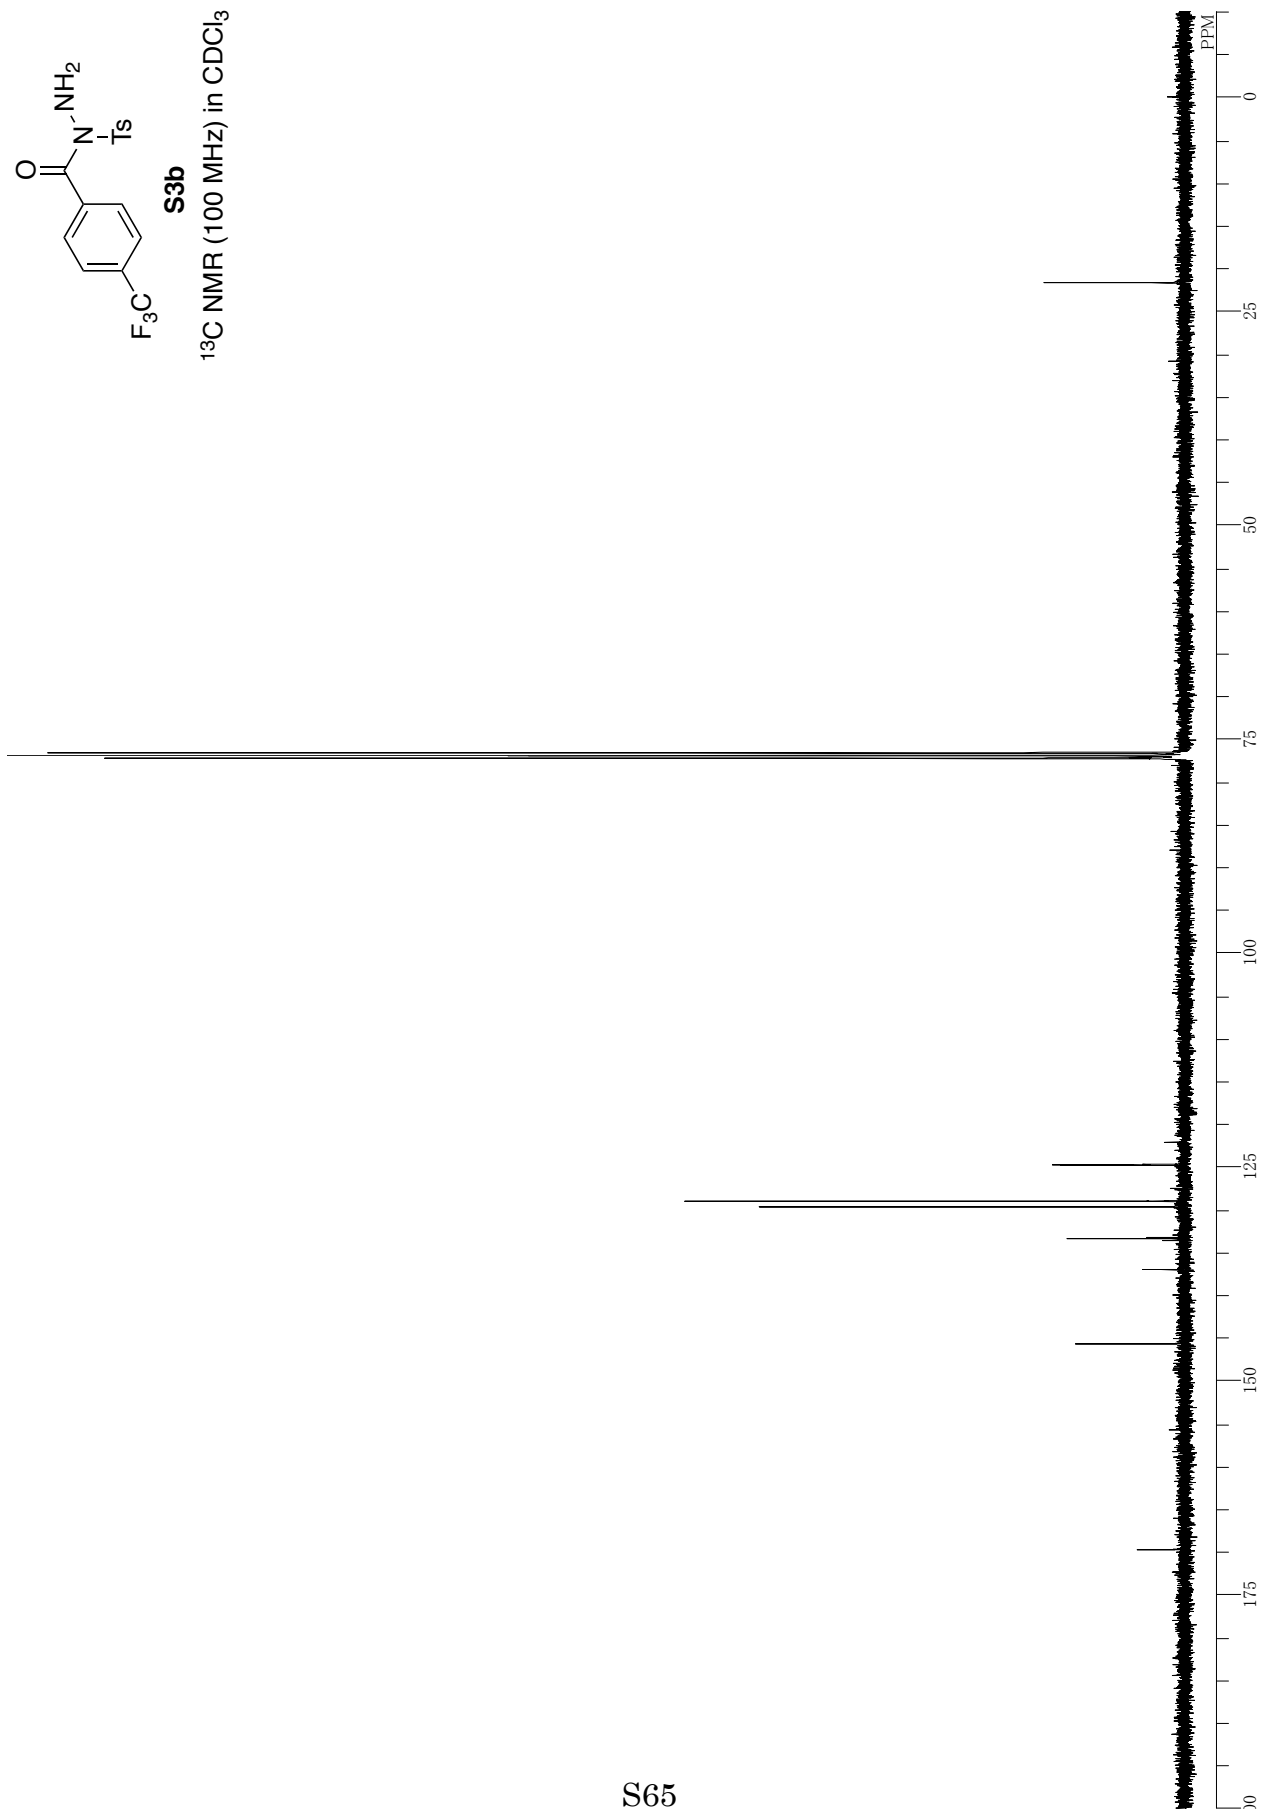

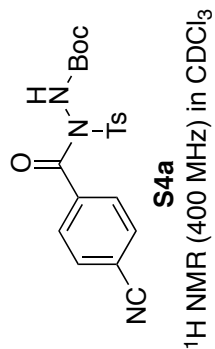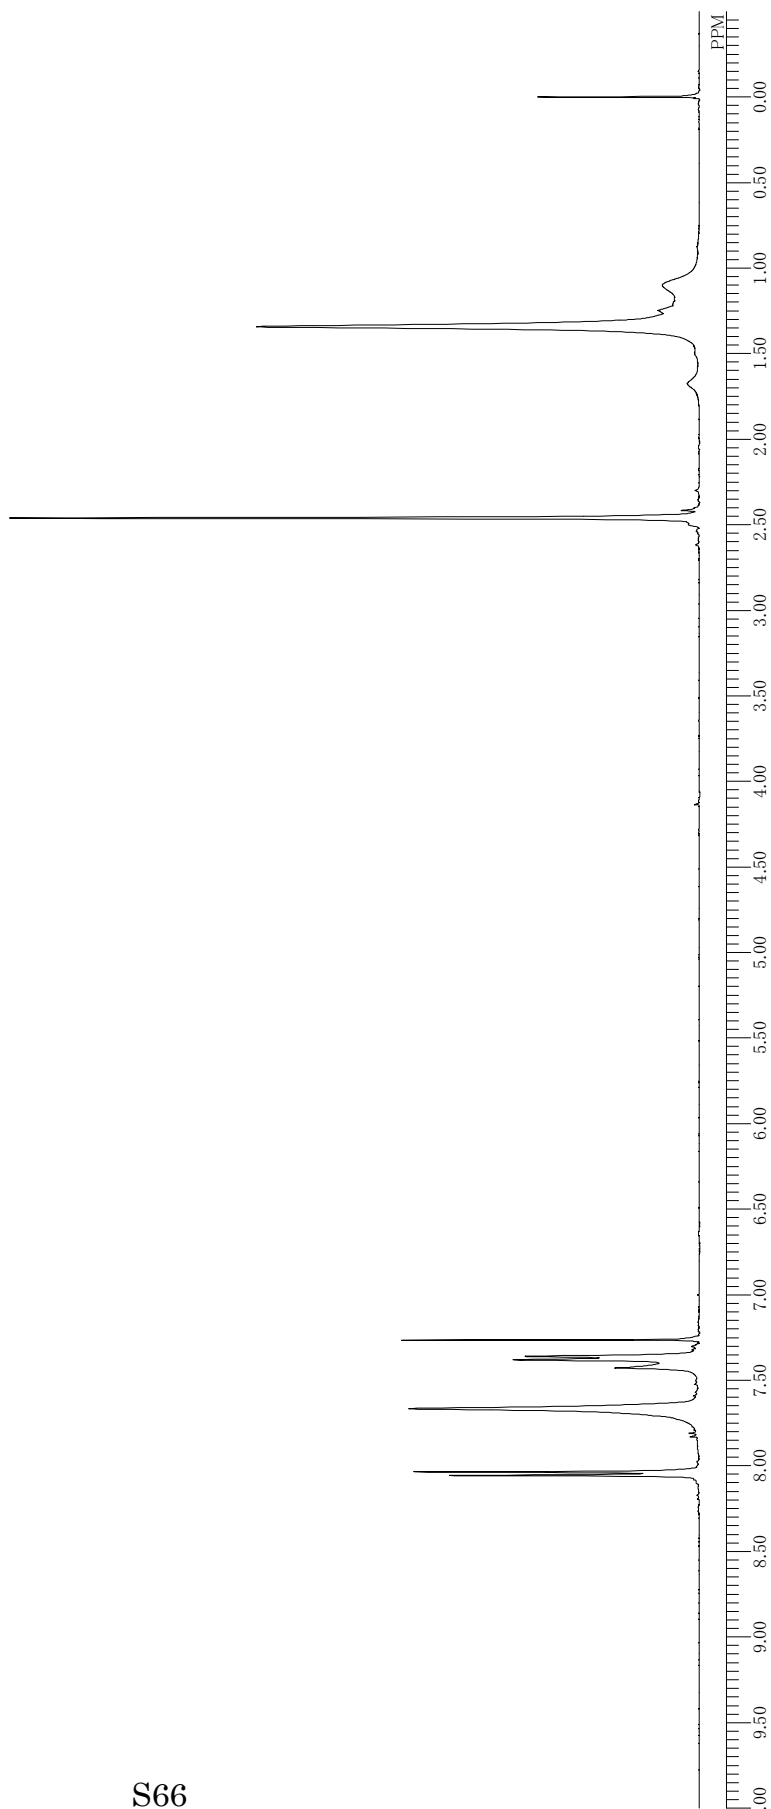

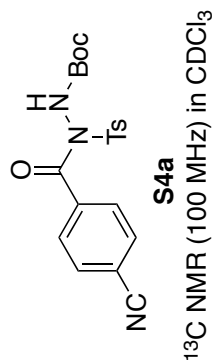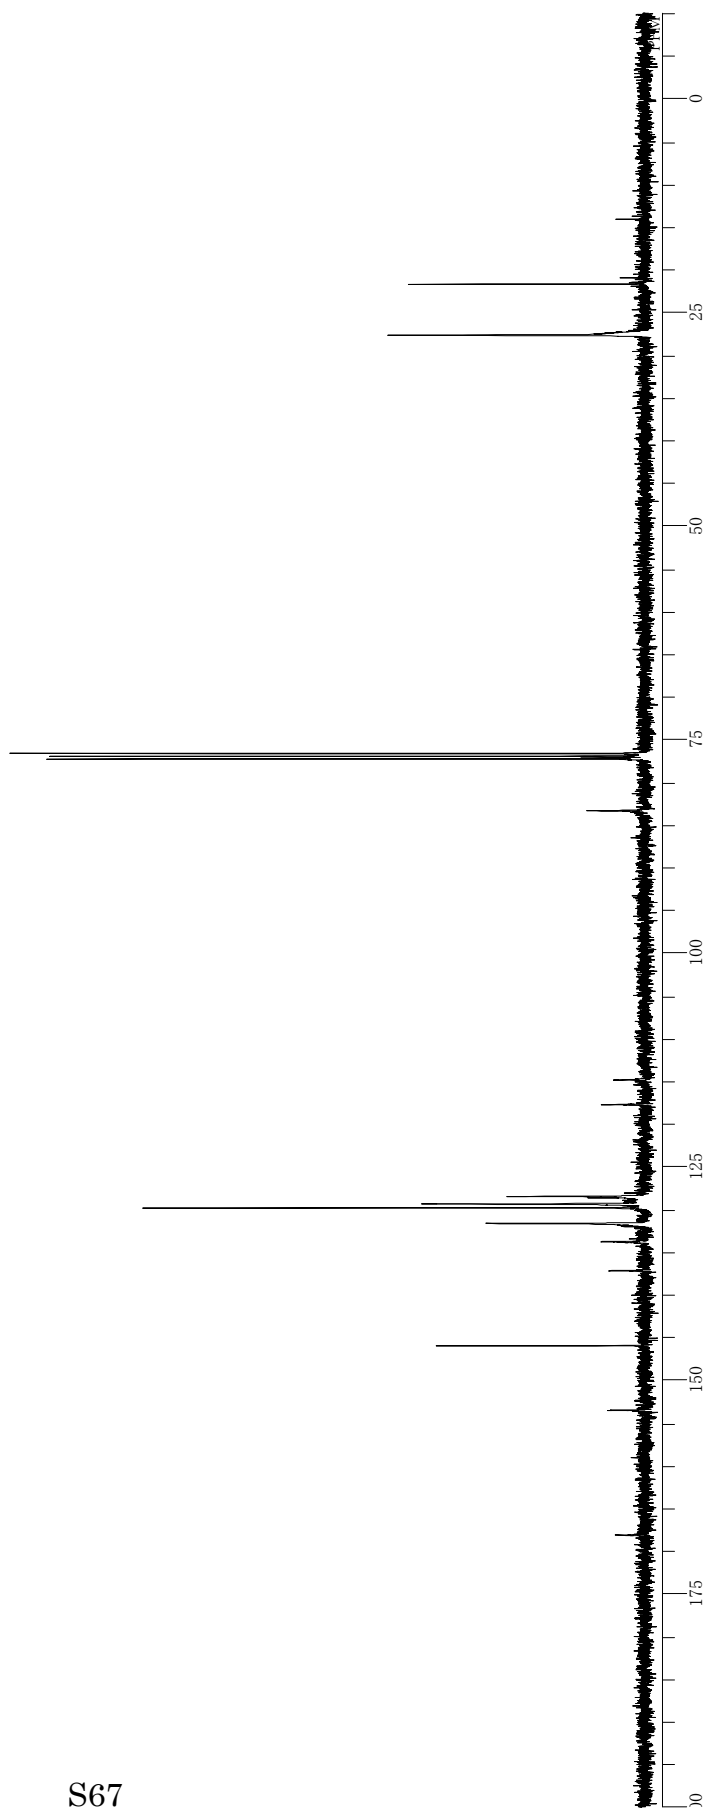

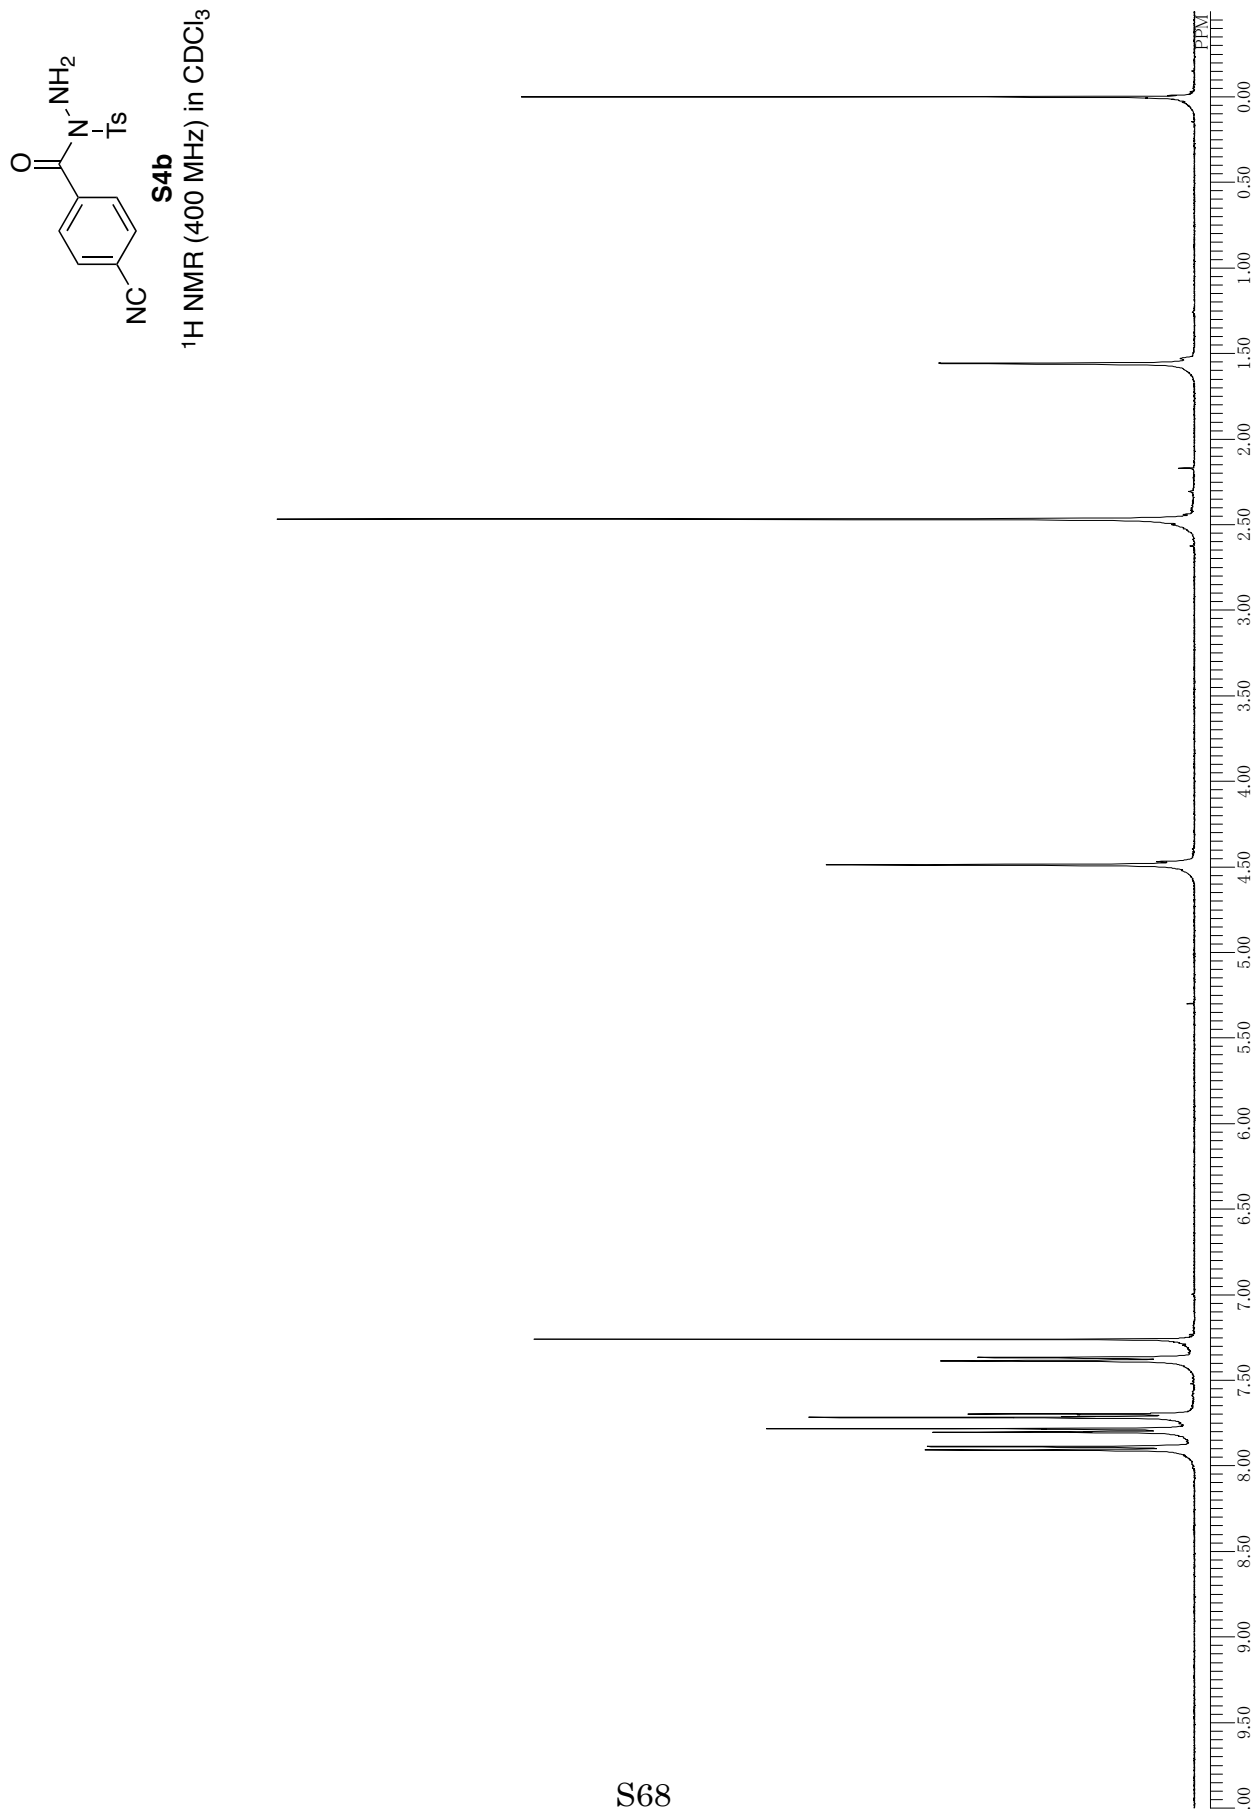



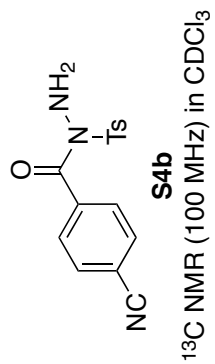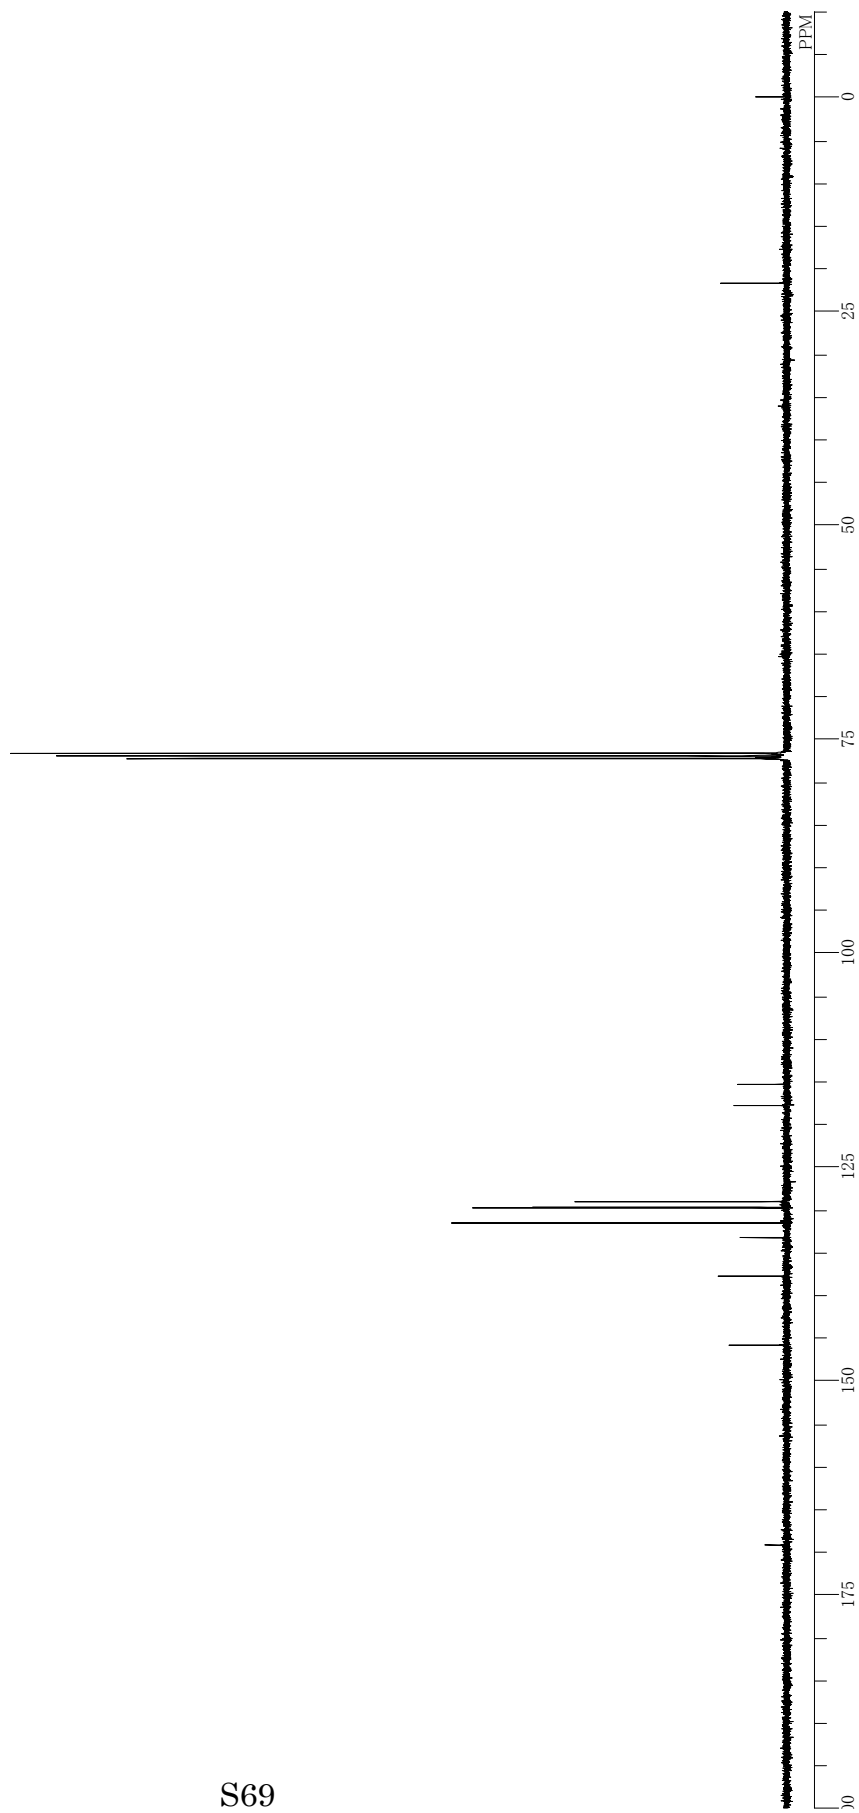

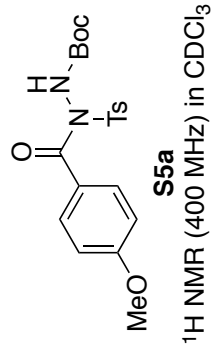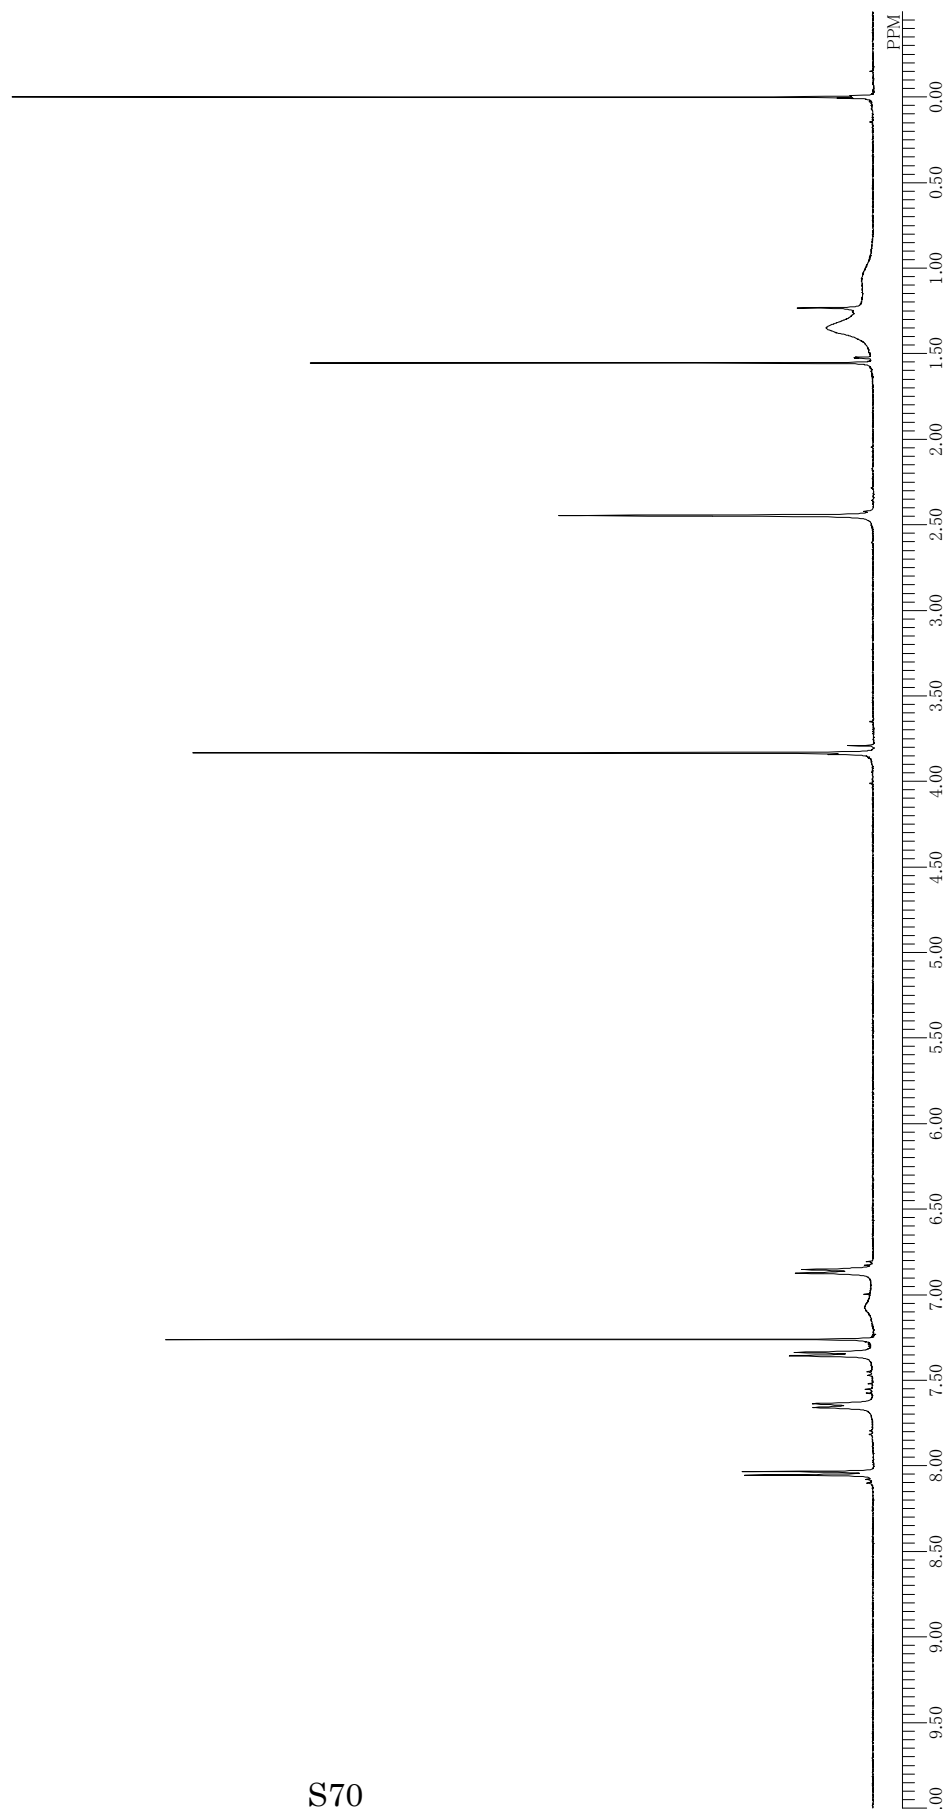

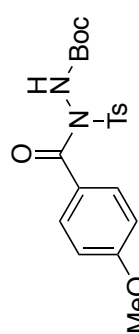

**S5a**

 $^{13}\text{C}$  NMR (100 MHz) in  $\text{CDCl}_3$ 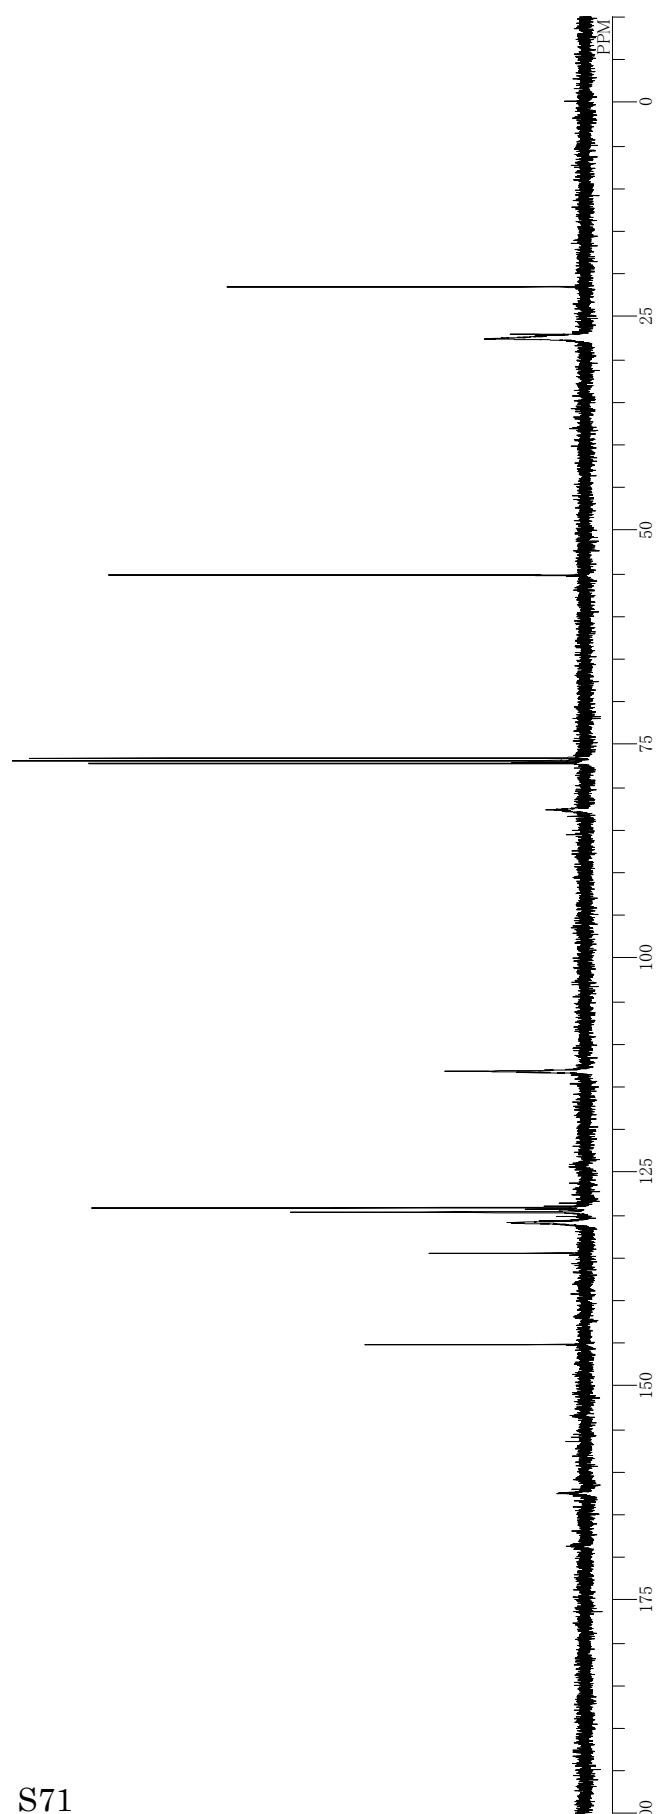

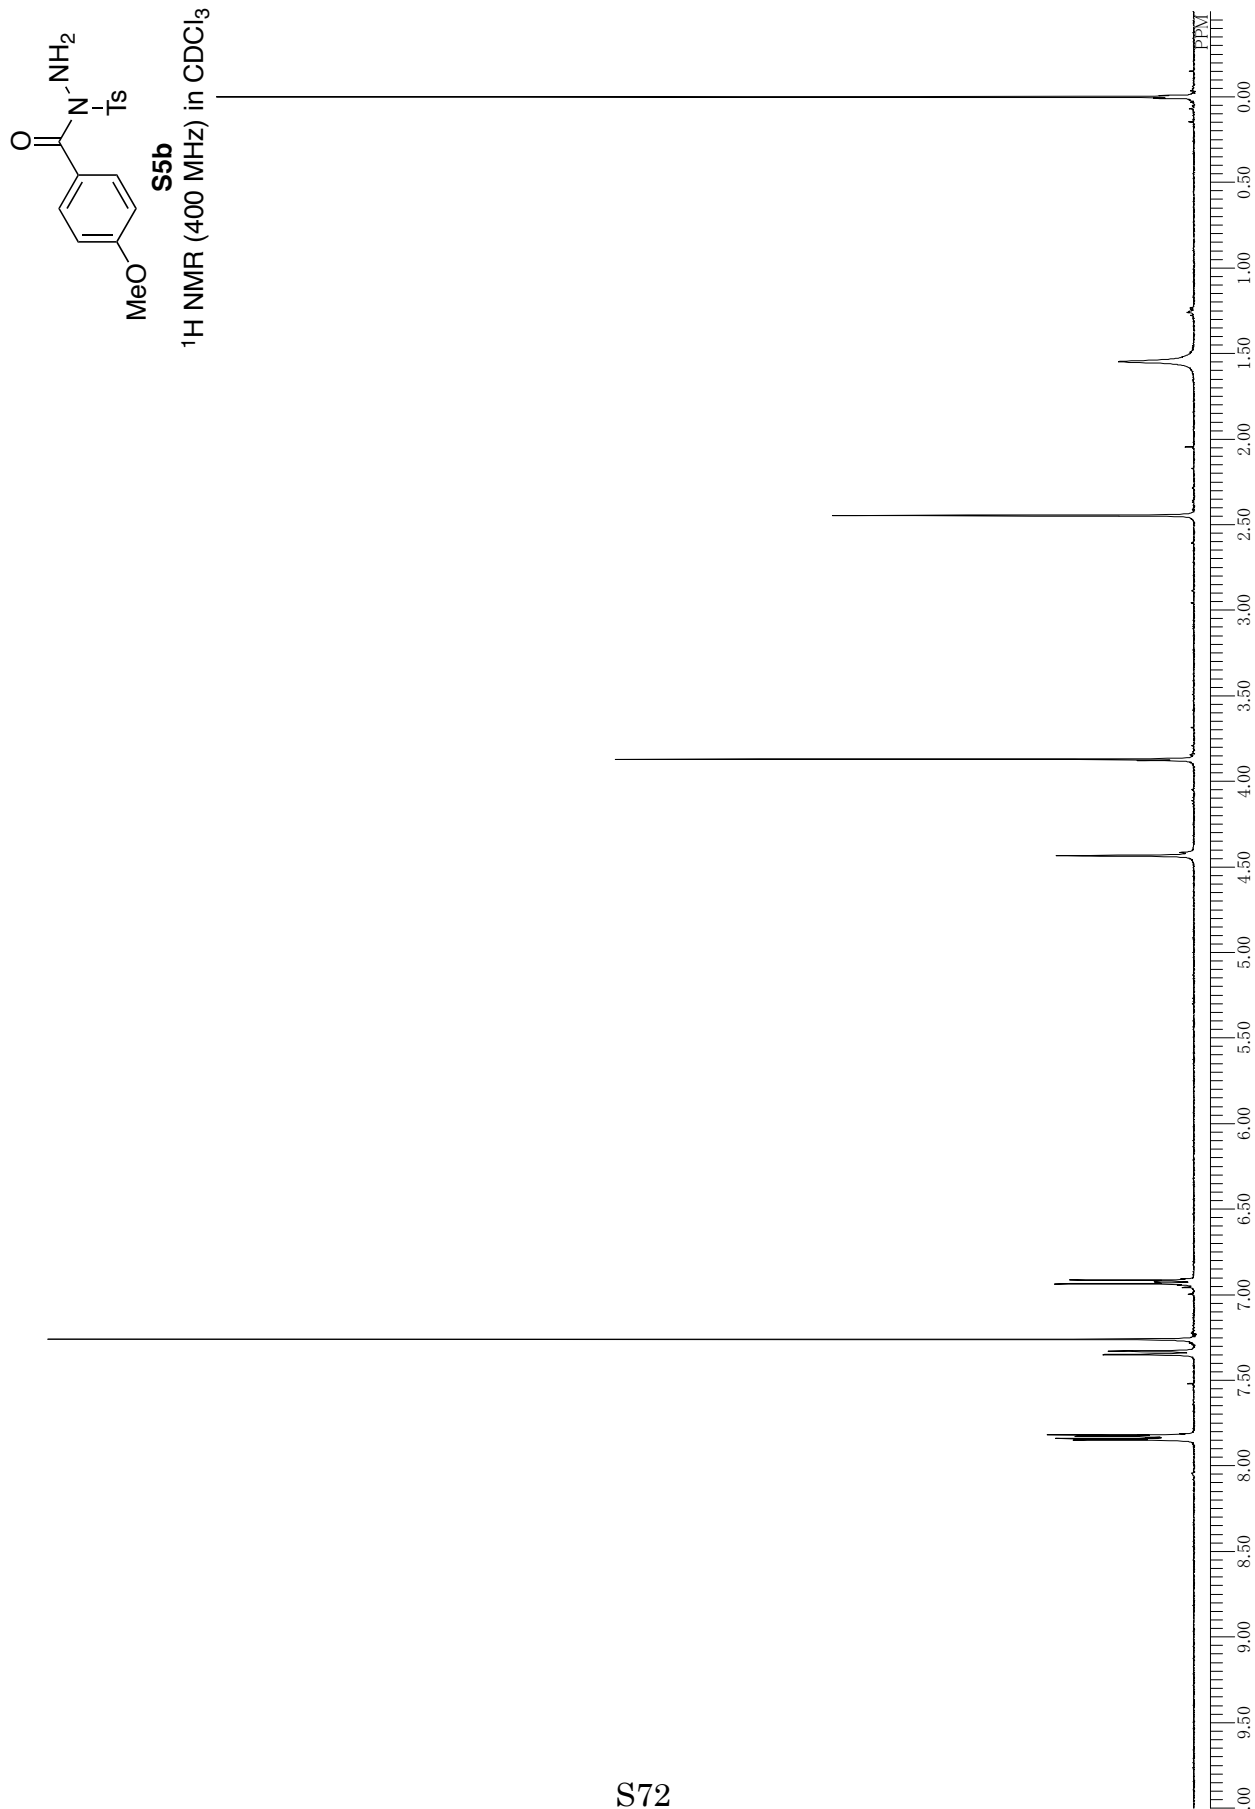

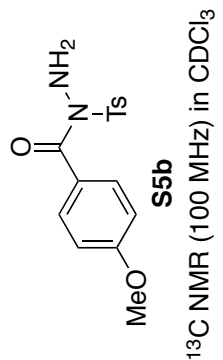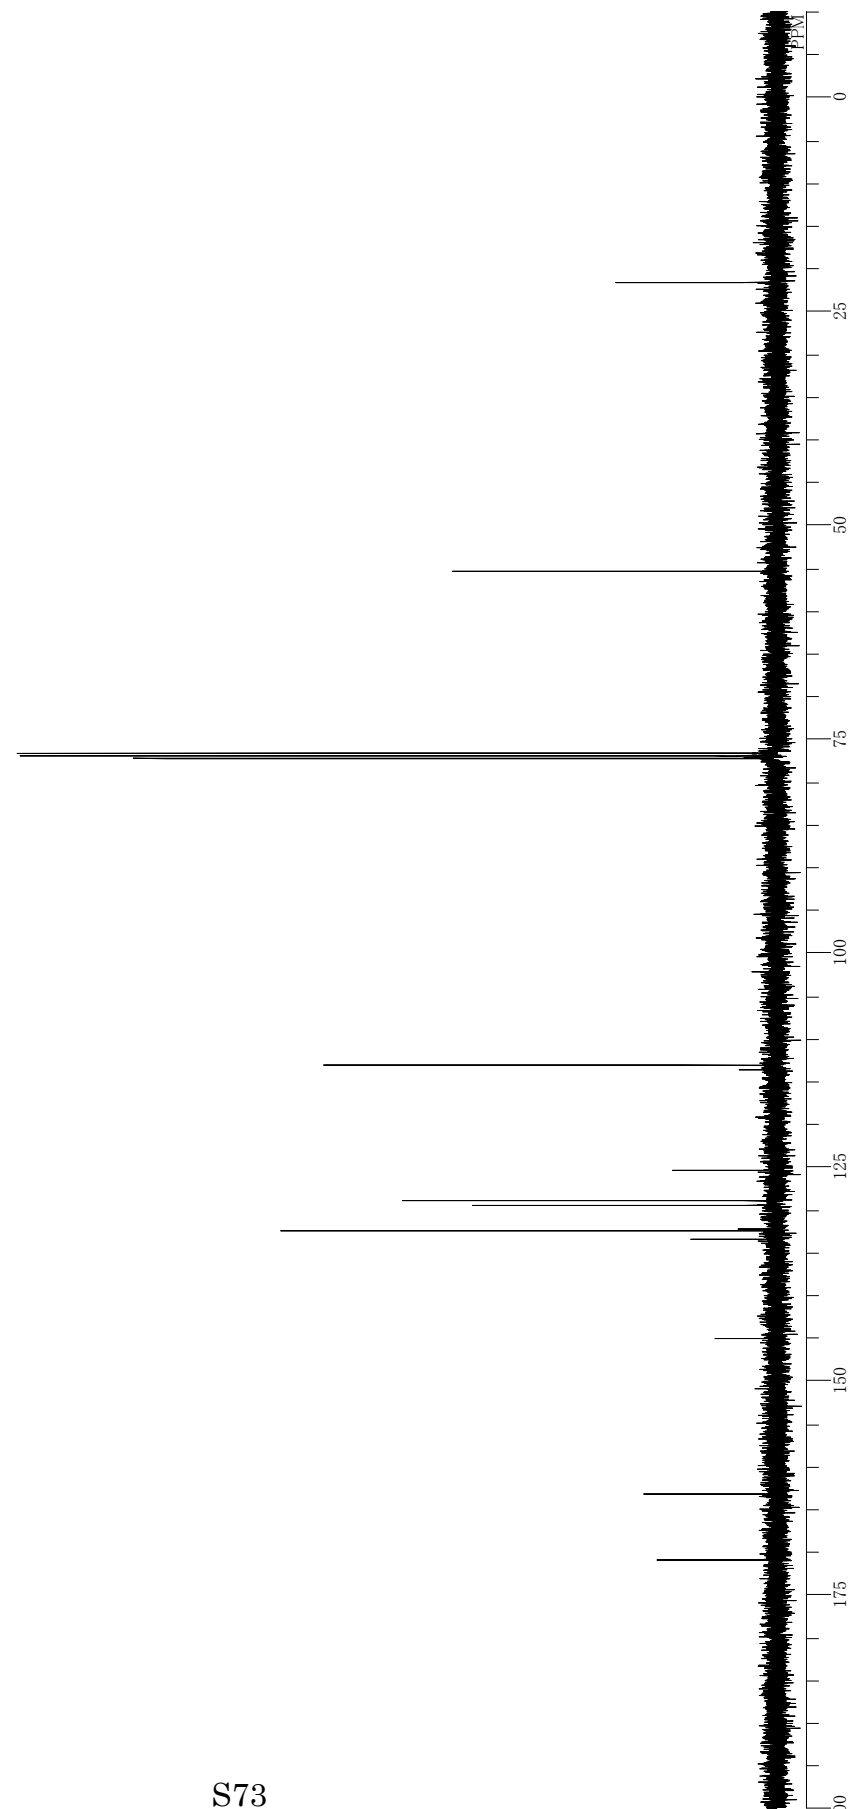

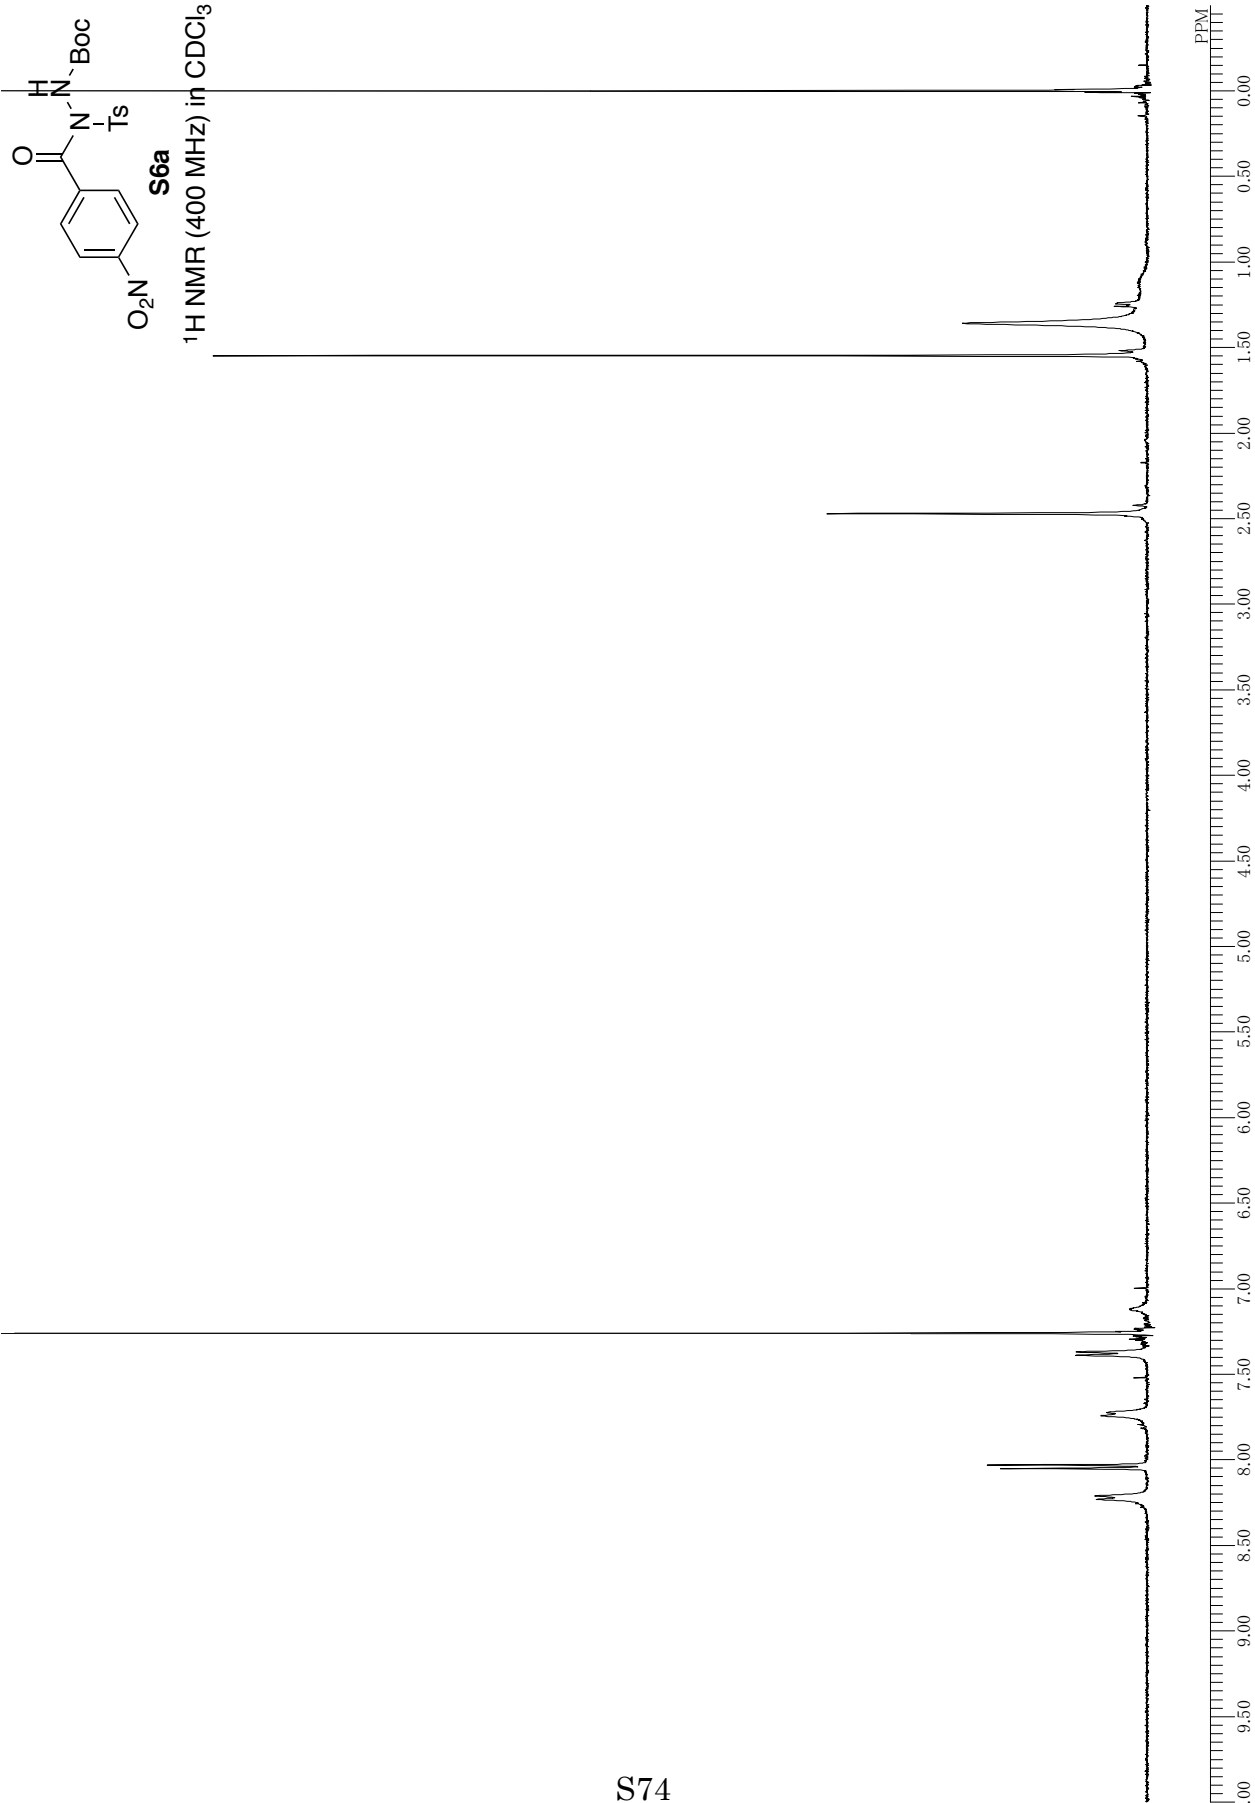

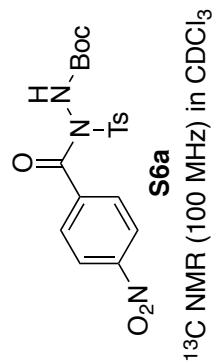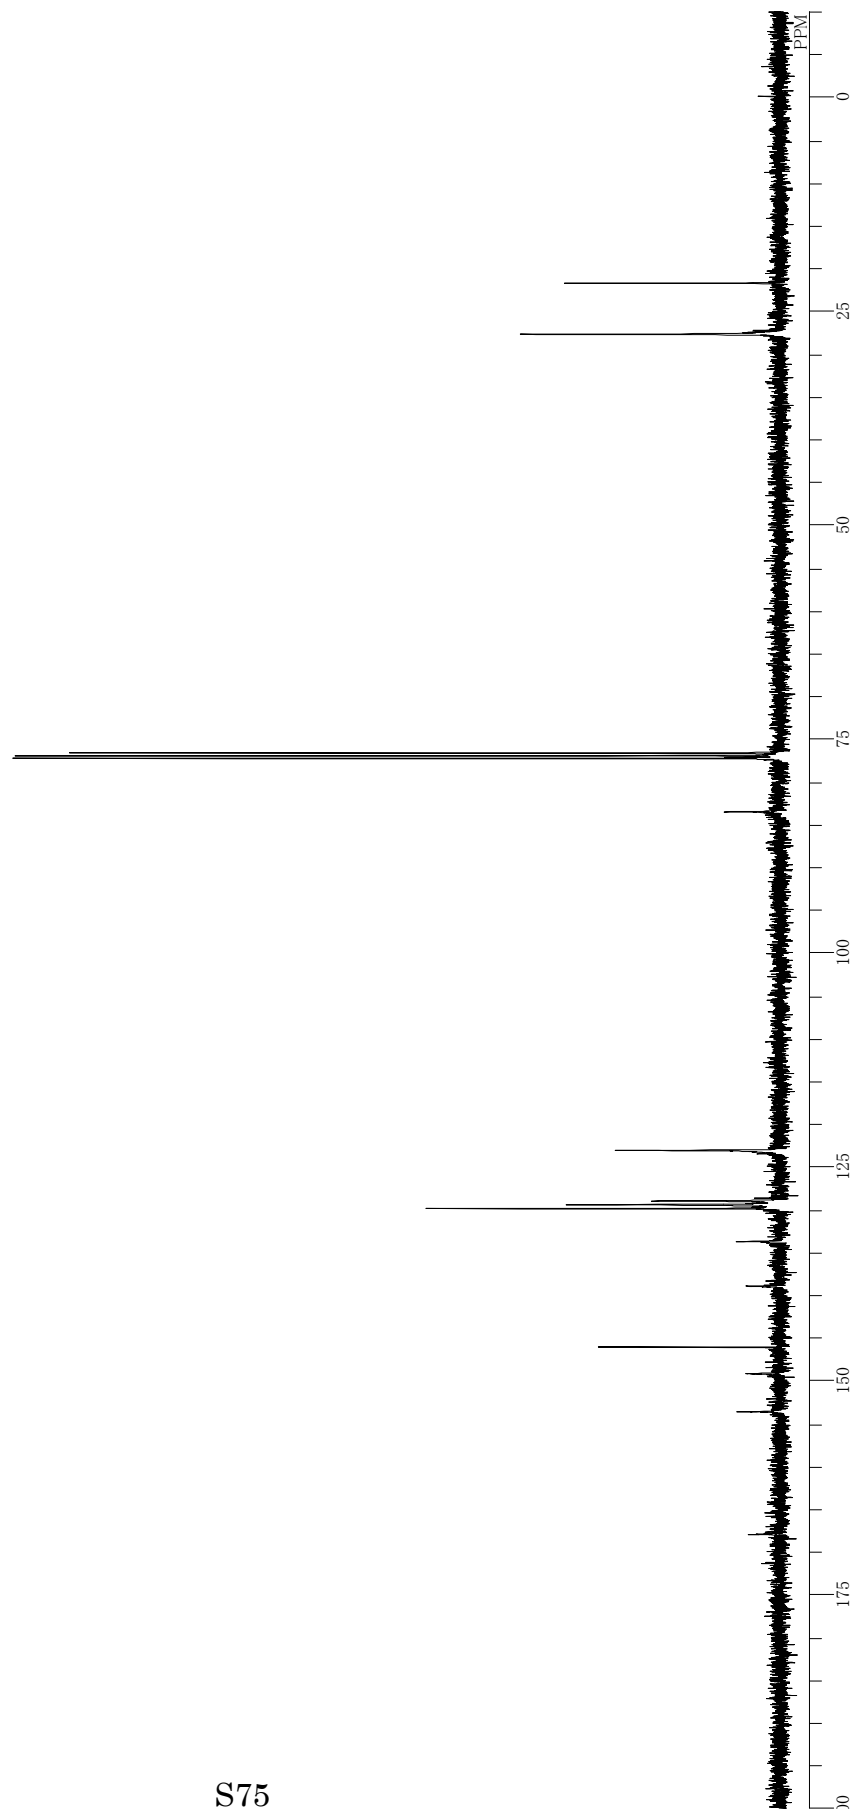

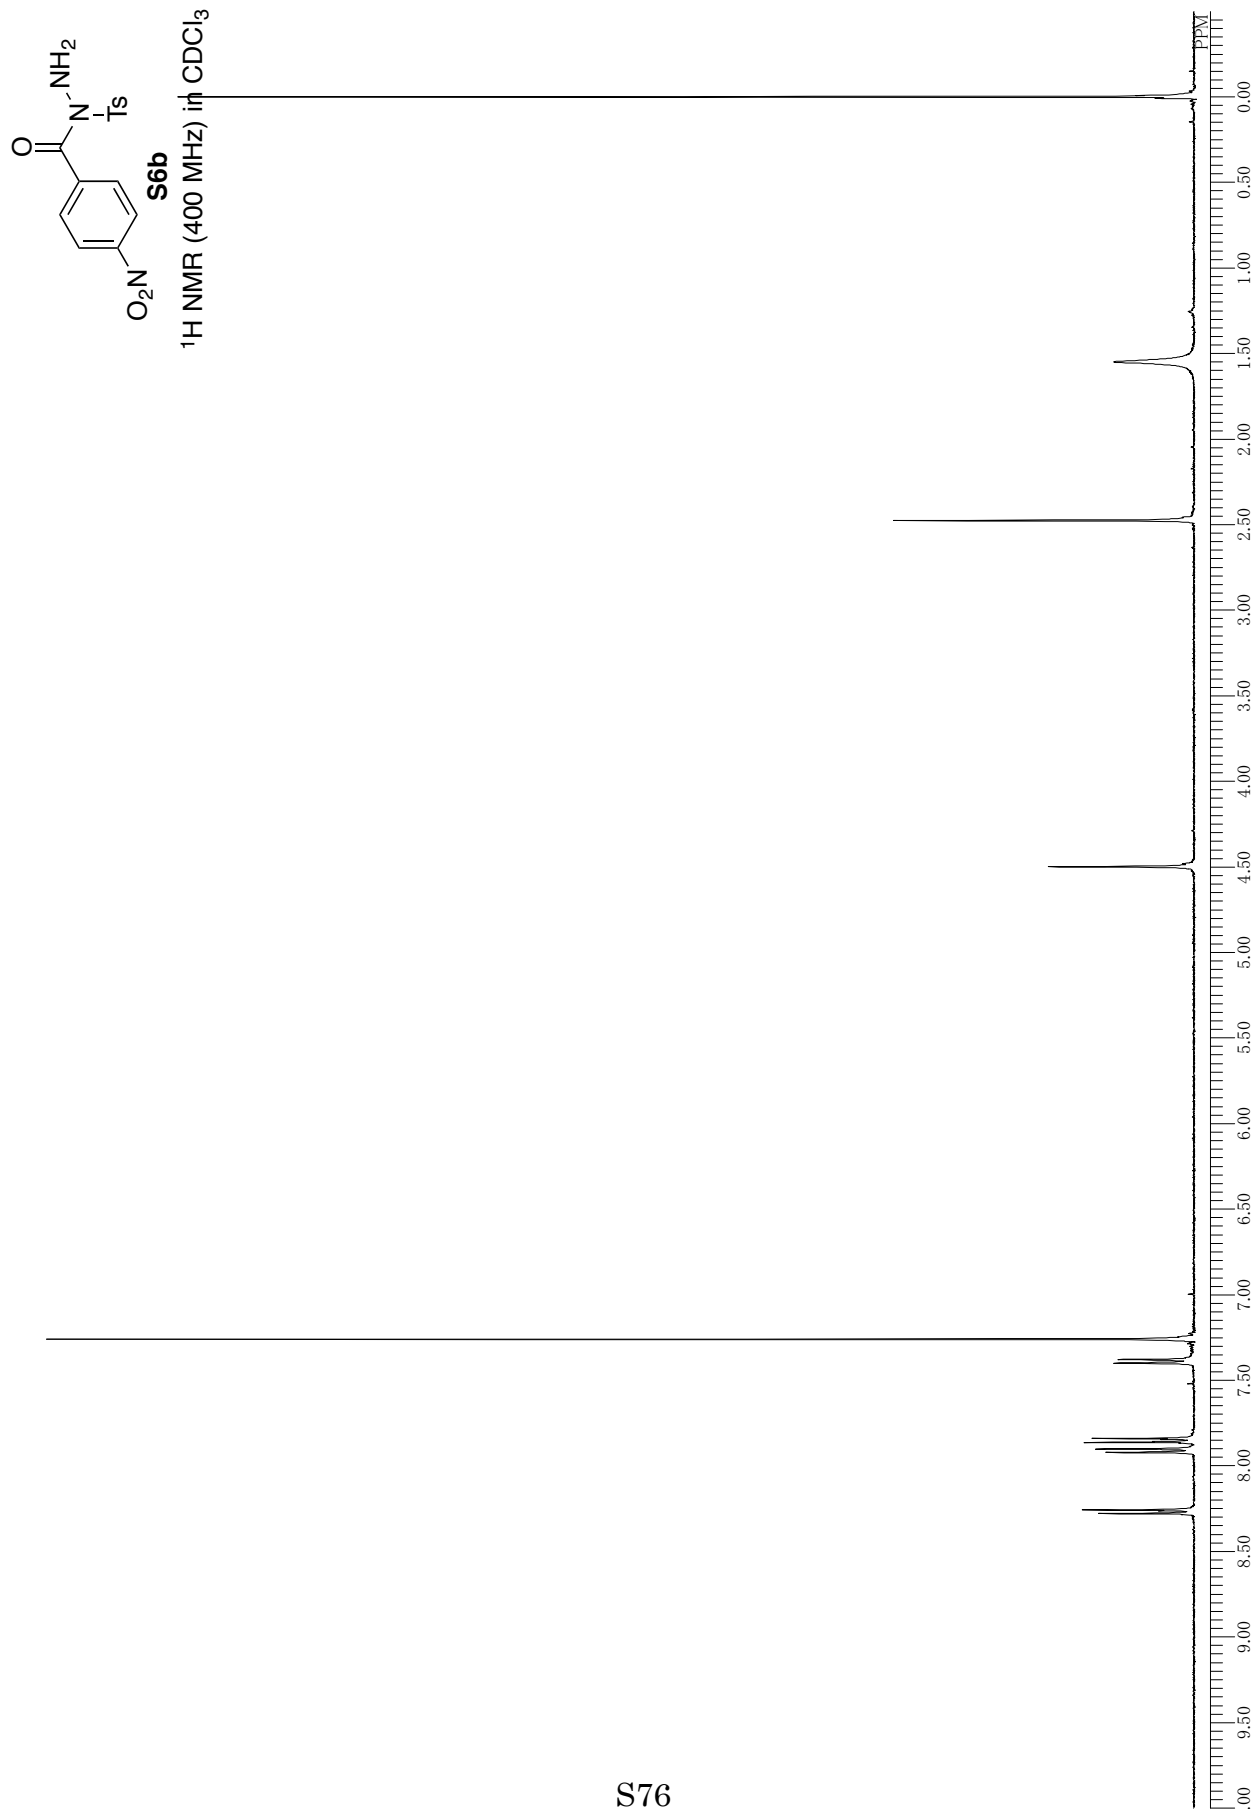



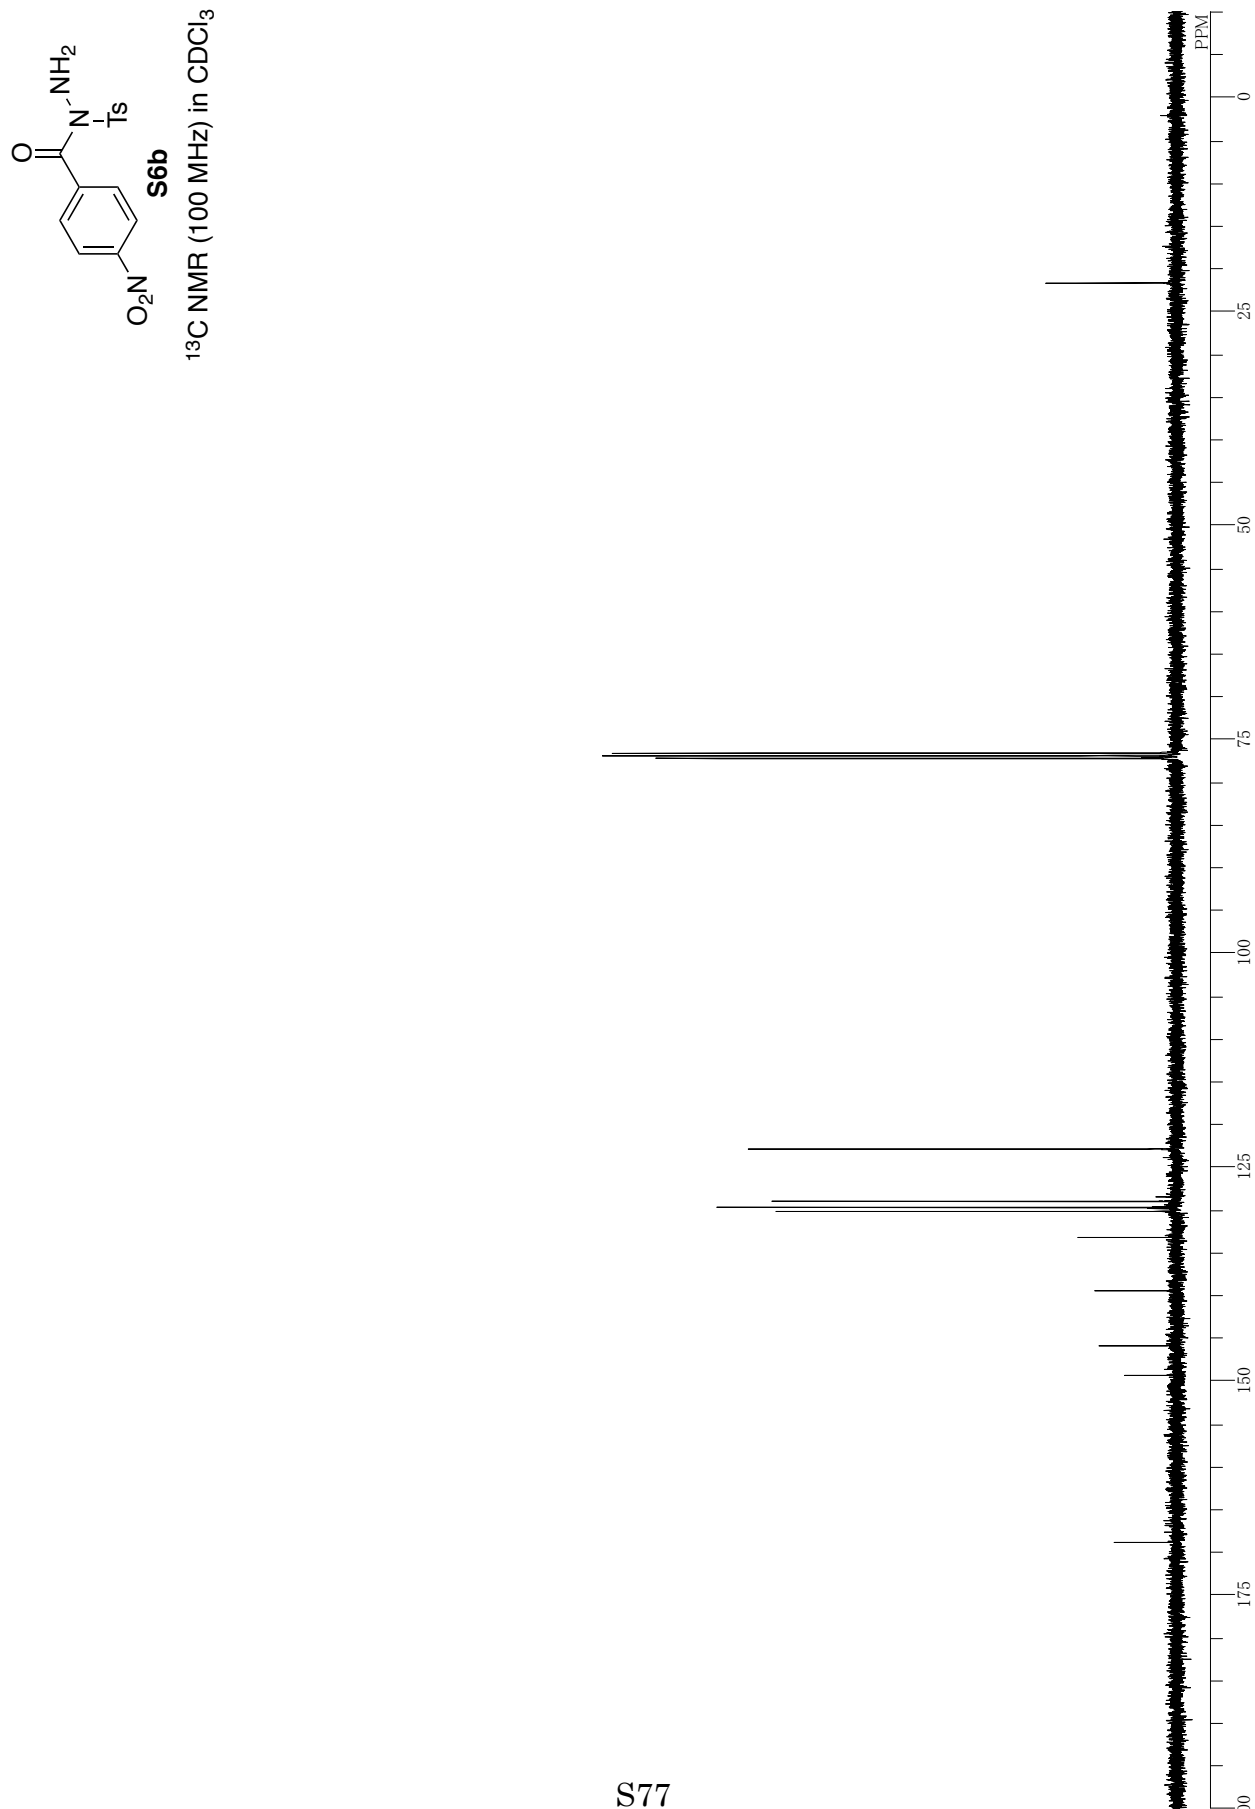

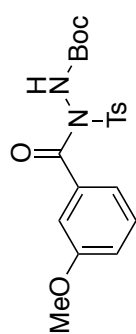

**S7a**  
<sup>1</sup>H NMR (400 MHz) in CDCl<sub>3</sub>

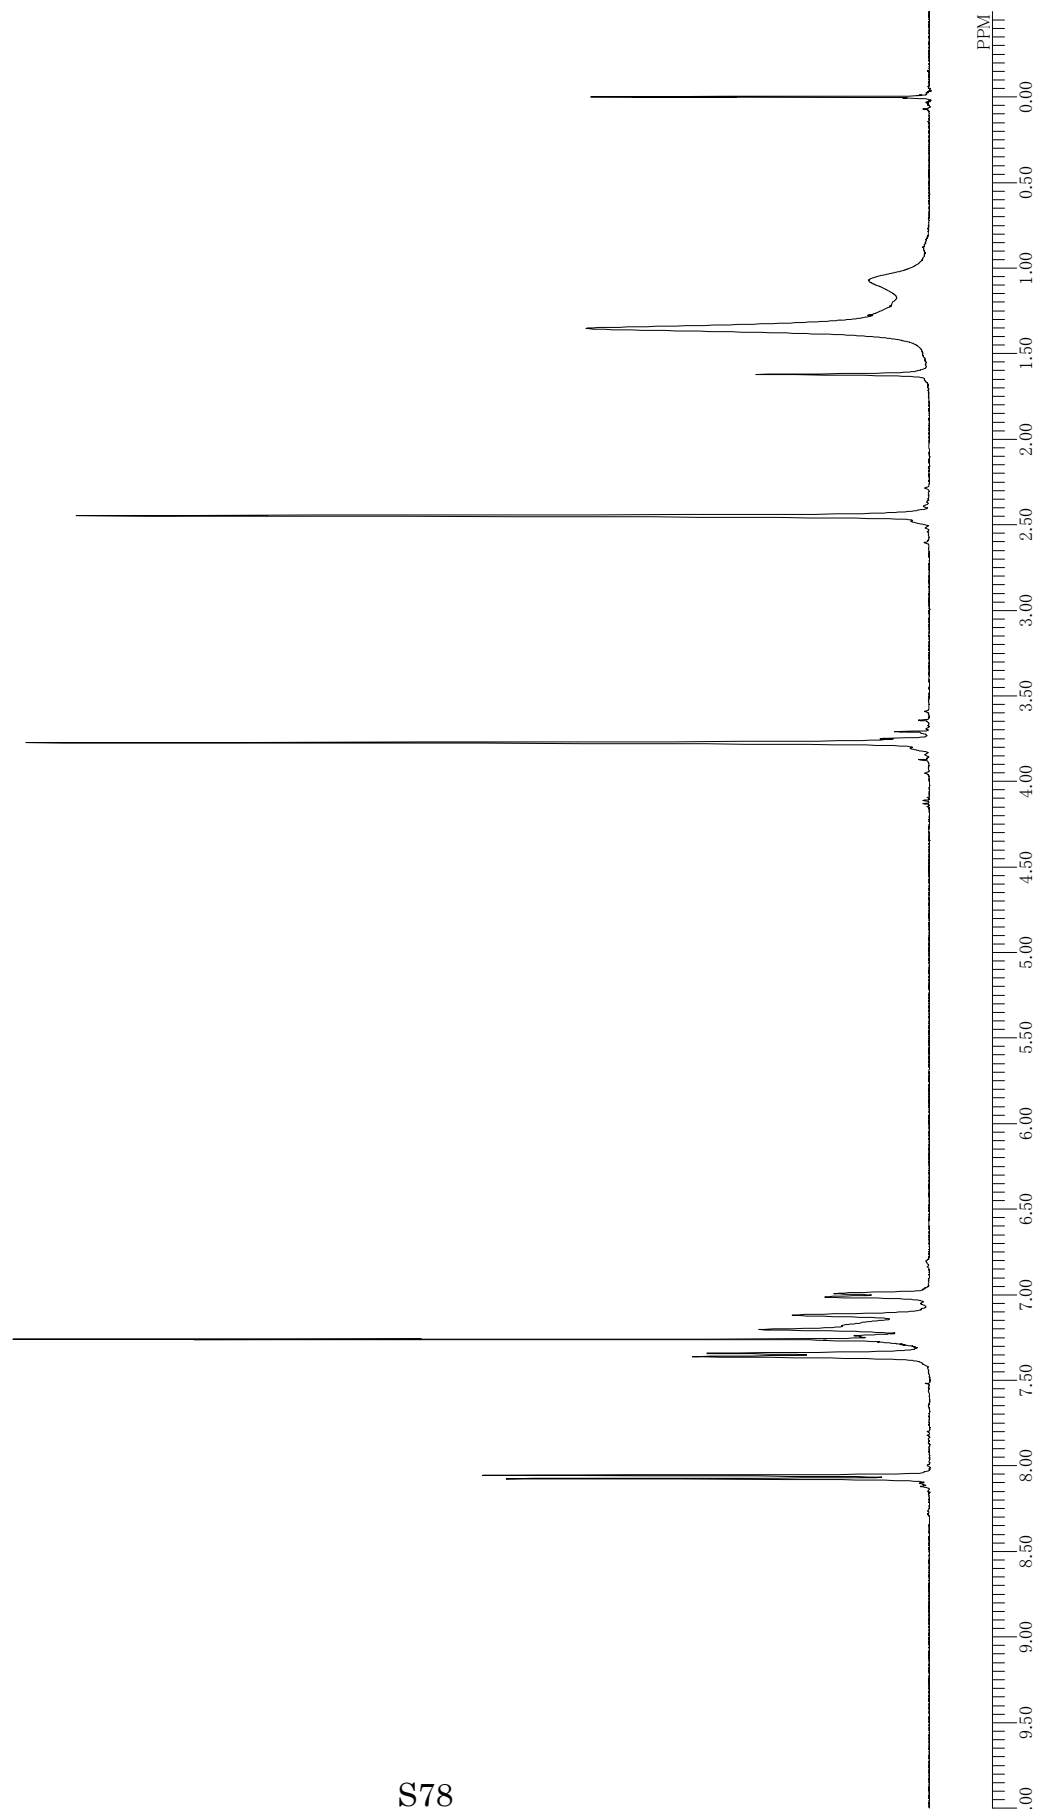

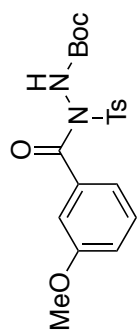

**S7a**  
 $^{13}\text{C}$  NMR (100 MHz) in  $\text{CDCl}_3$

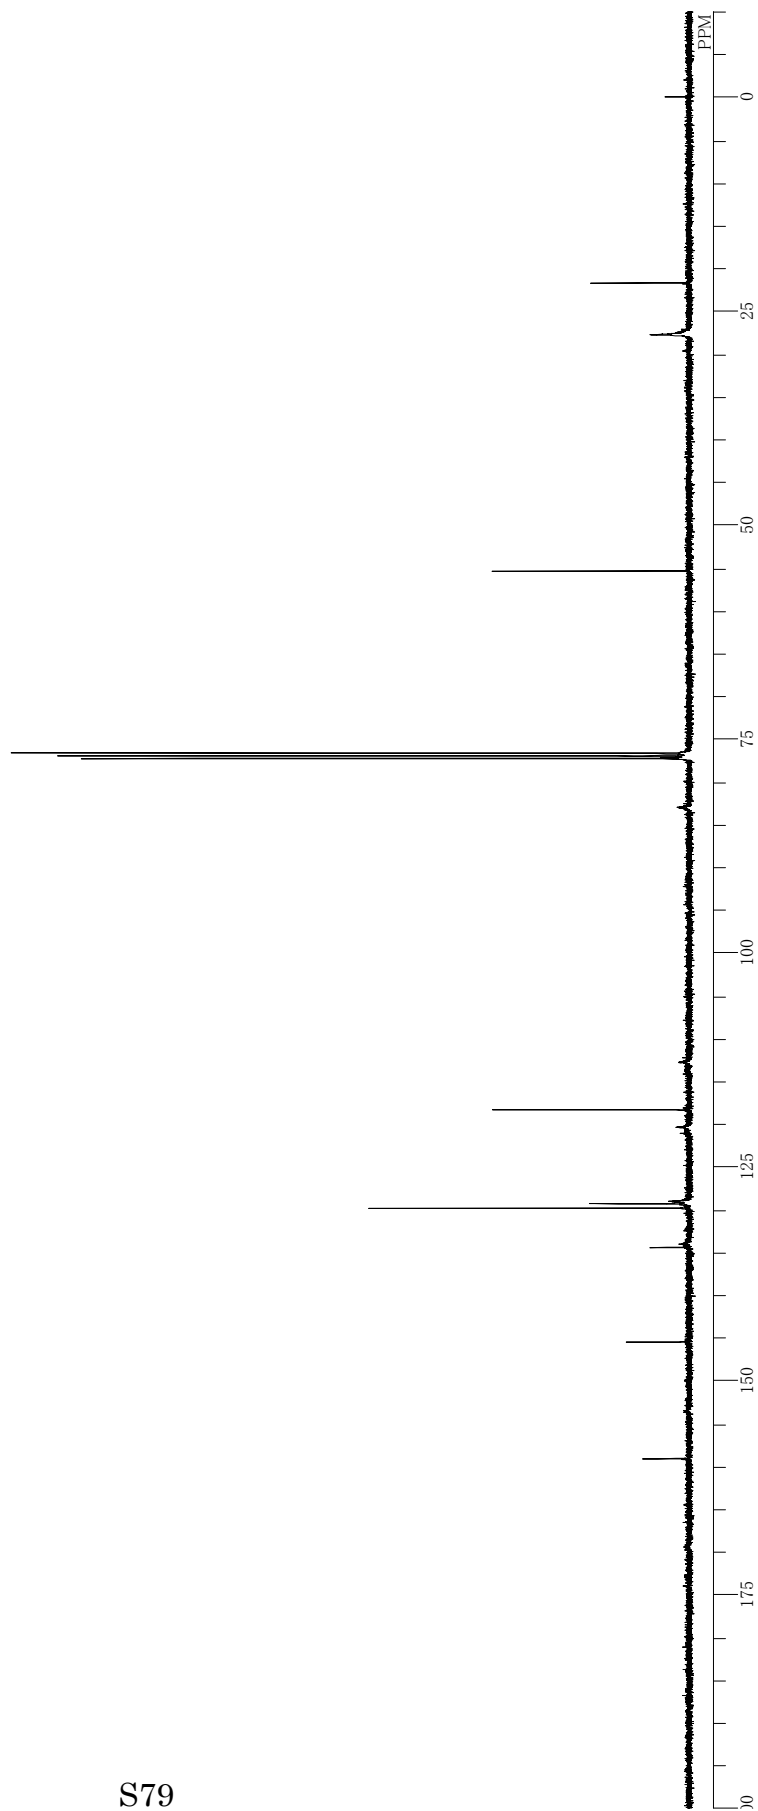

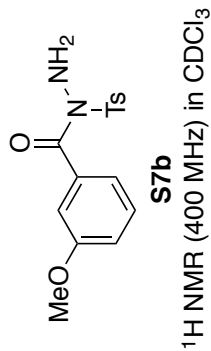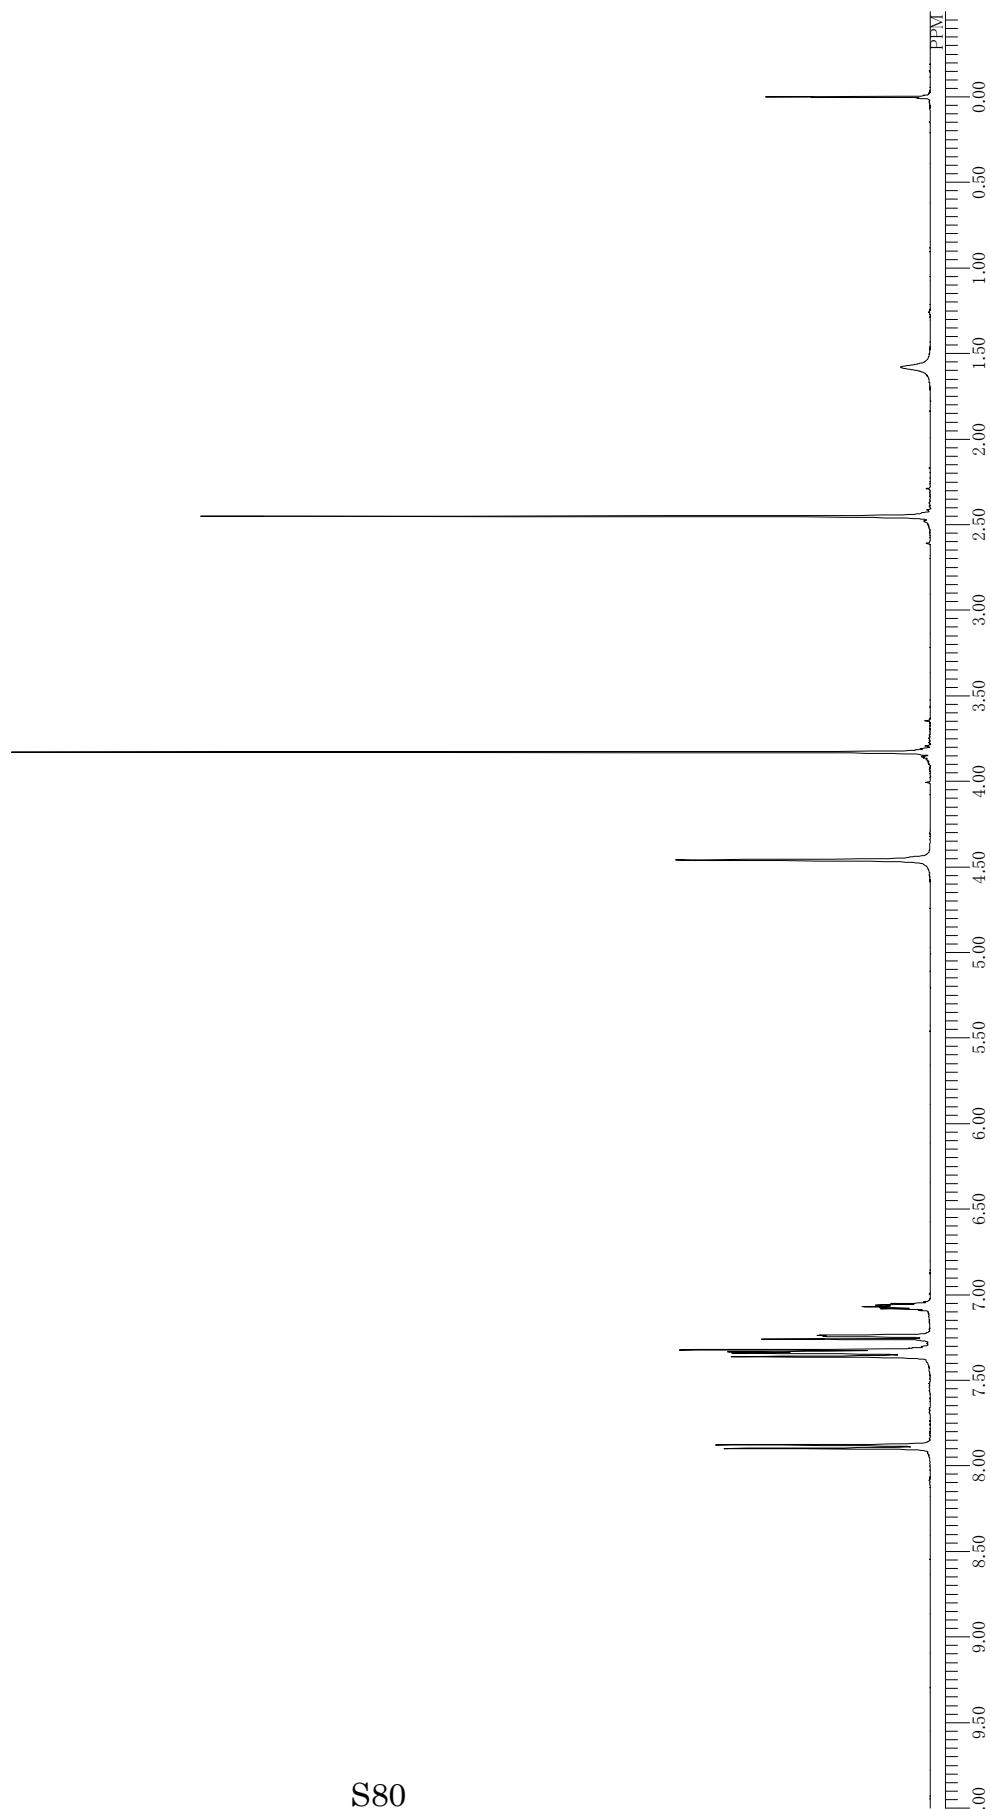

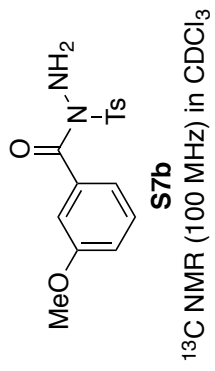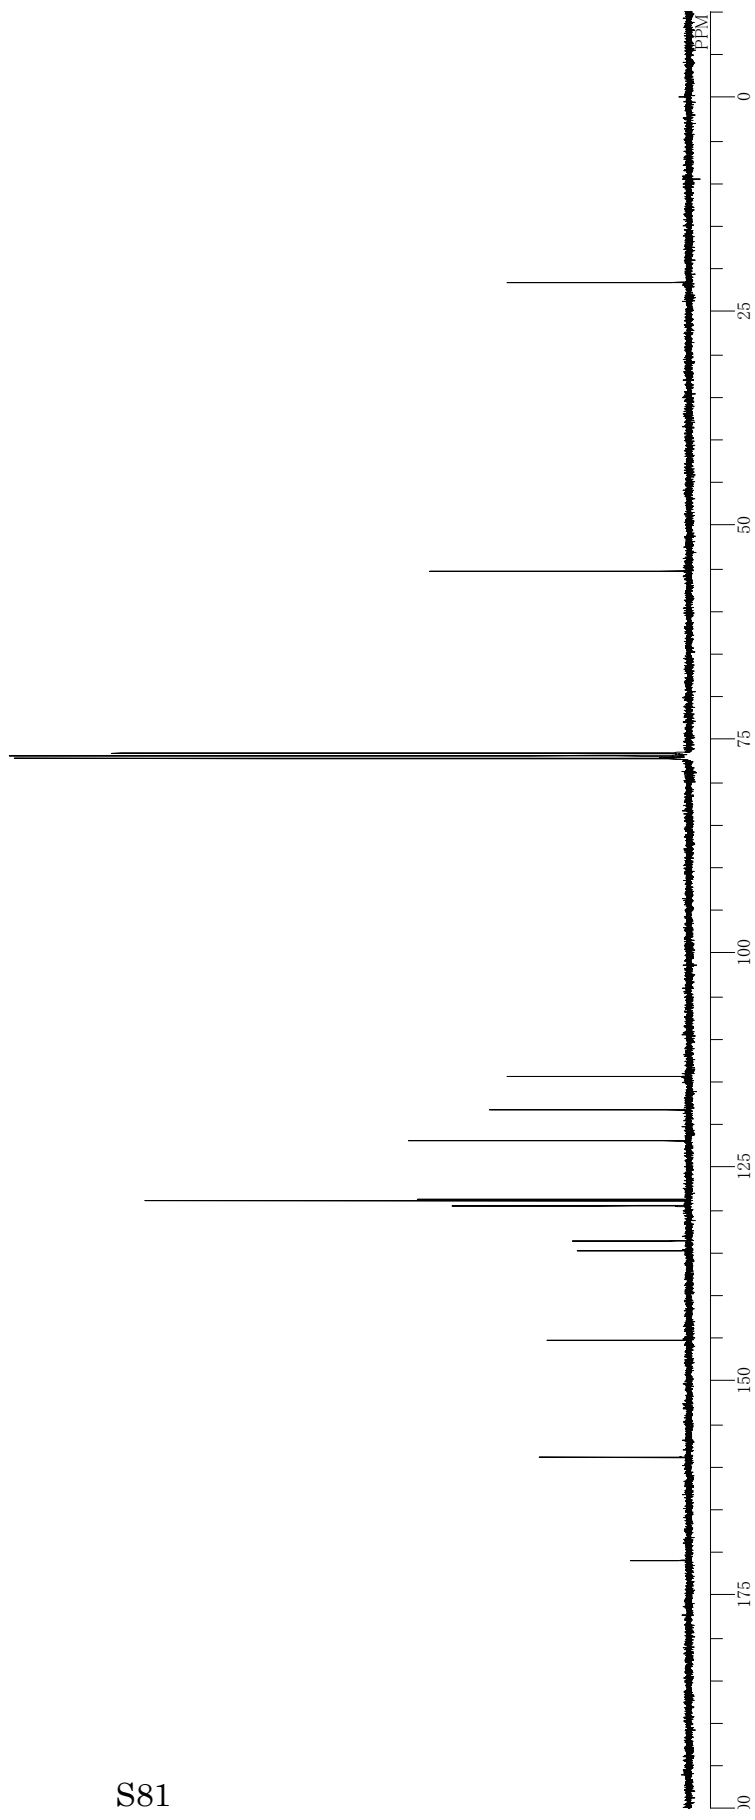

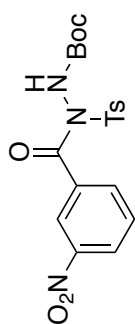 $^1\text{H}$  NMR (400 MHz) in  $\text{CDCl}_3$ 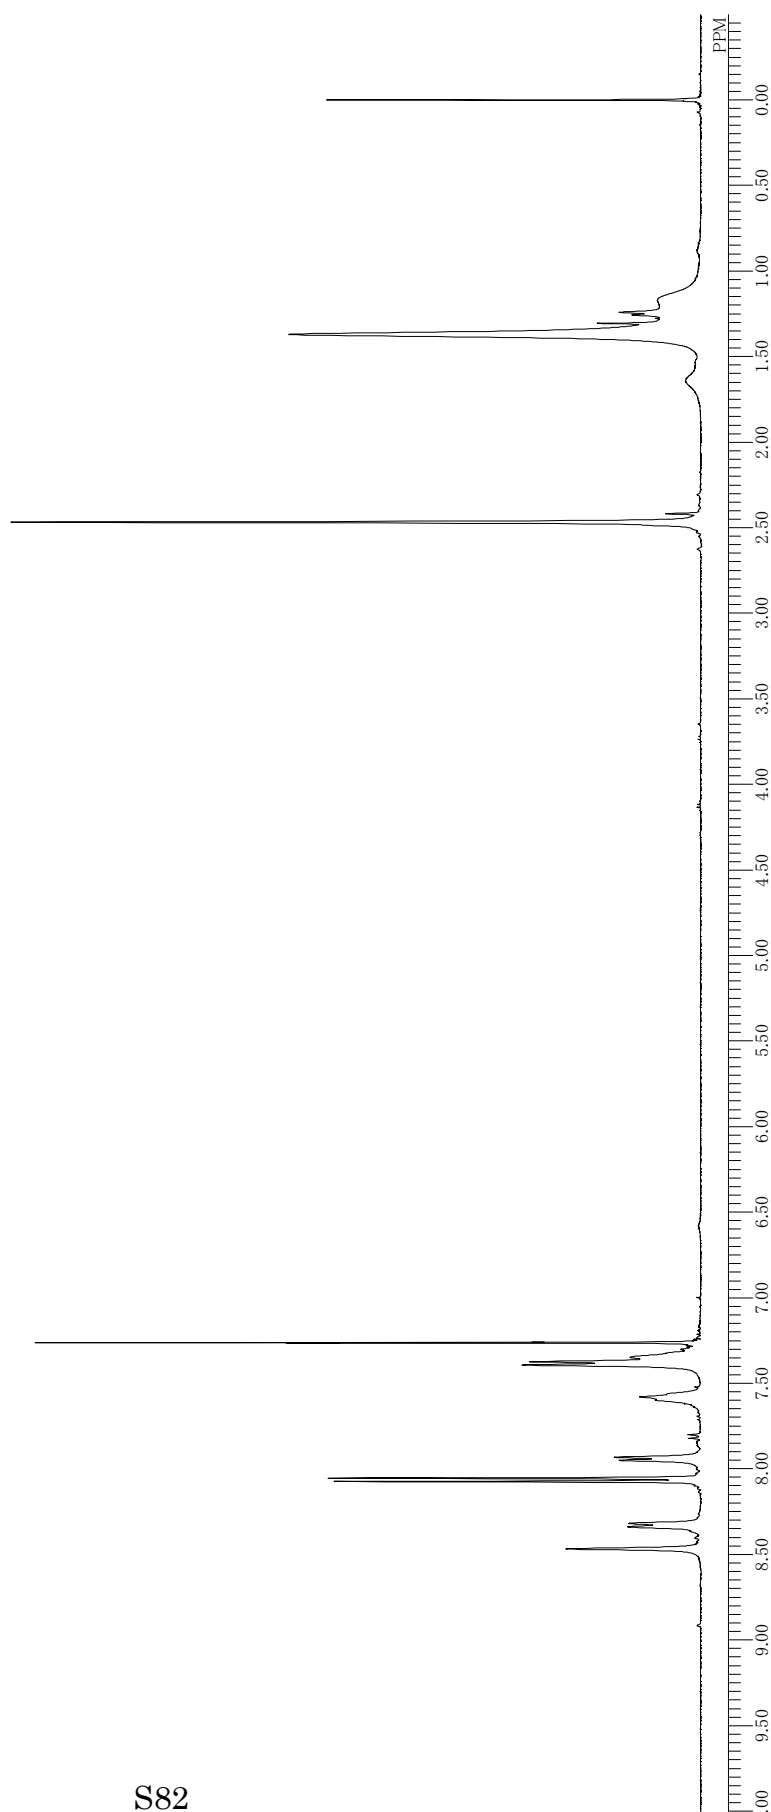

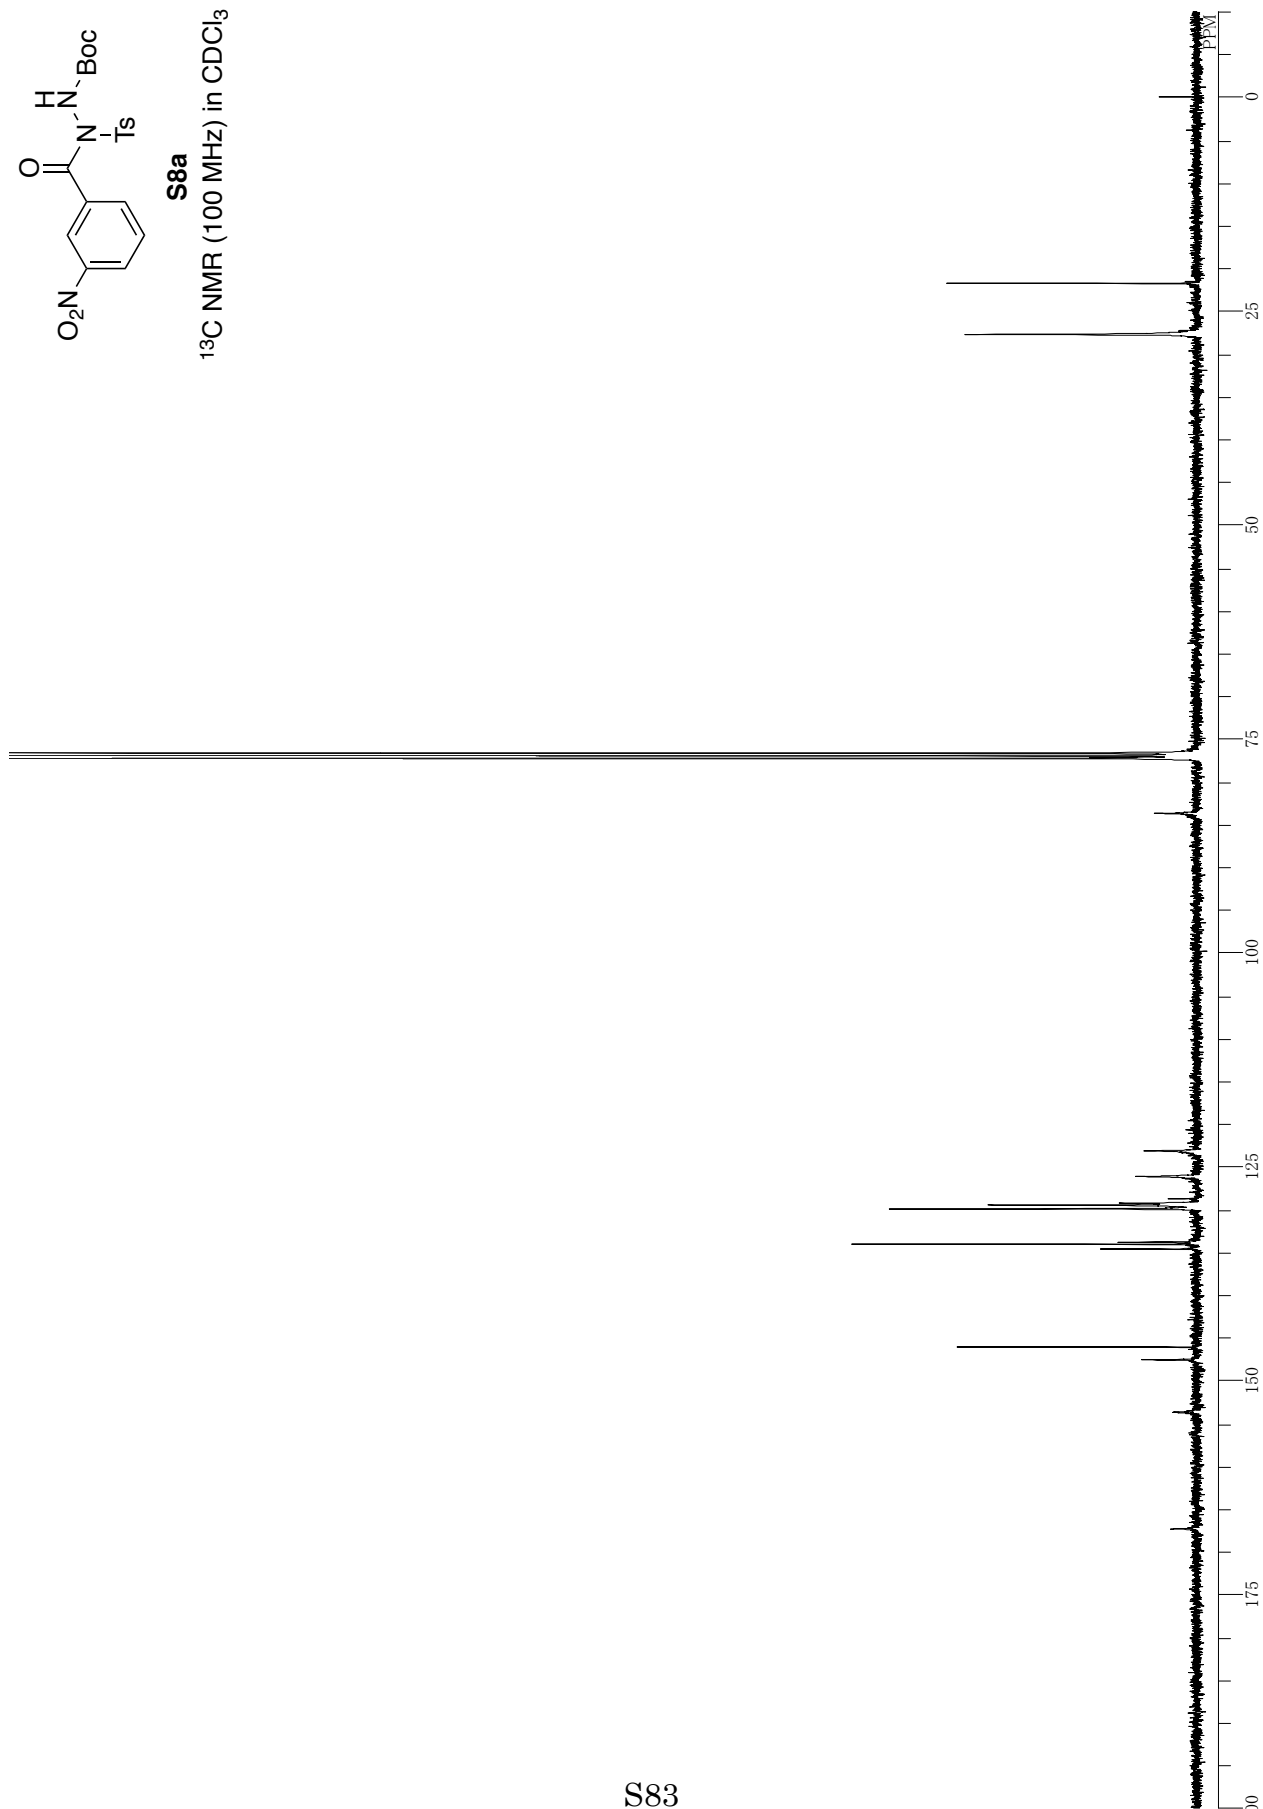

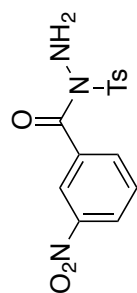

**S8b**

<sup>1</sup>H NMR (400 MHz) in CDCl<sub>3</sub>

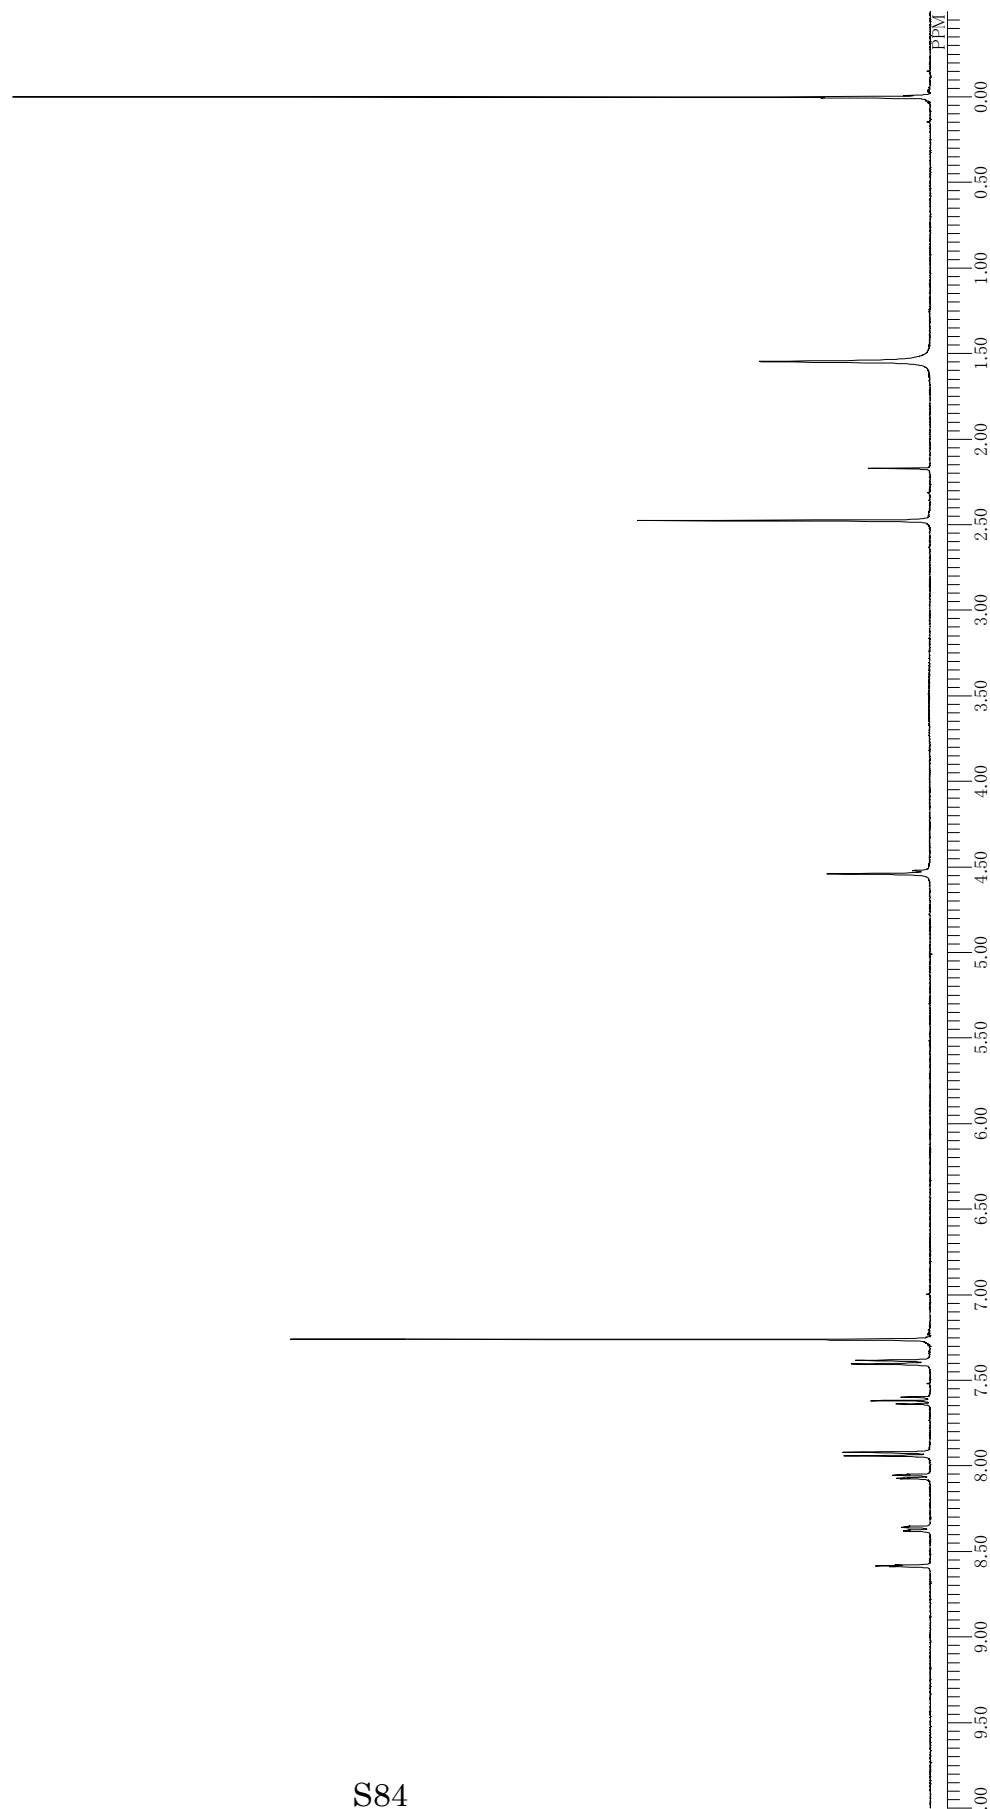



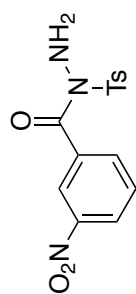

**S8b**

<sup>13</sup>C NMR (100 MHz) in CDCl<sub>3</sub>

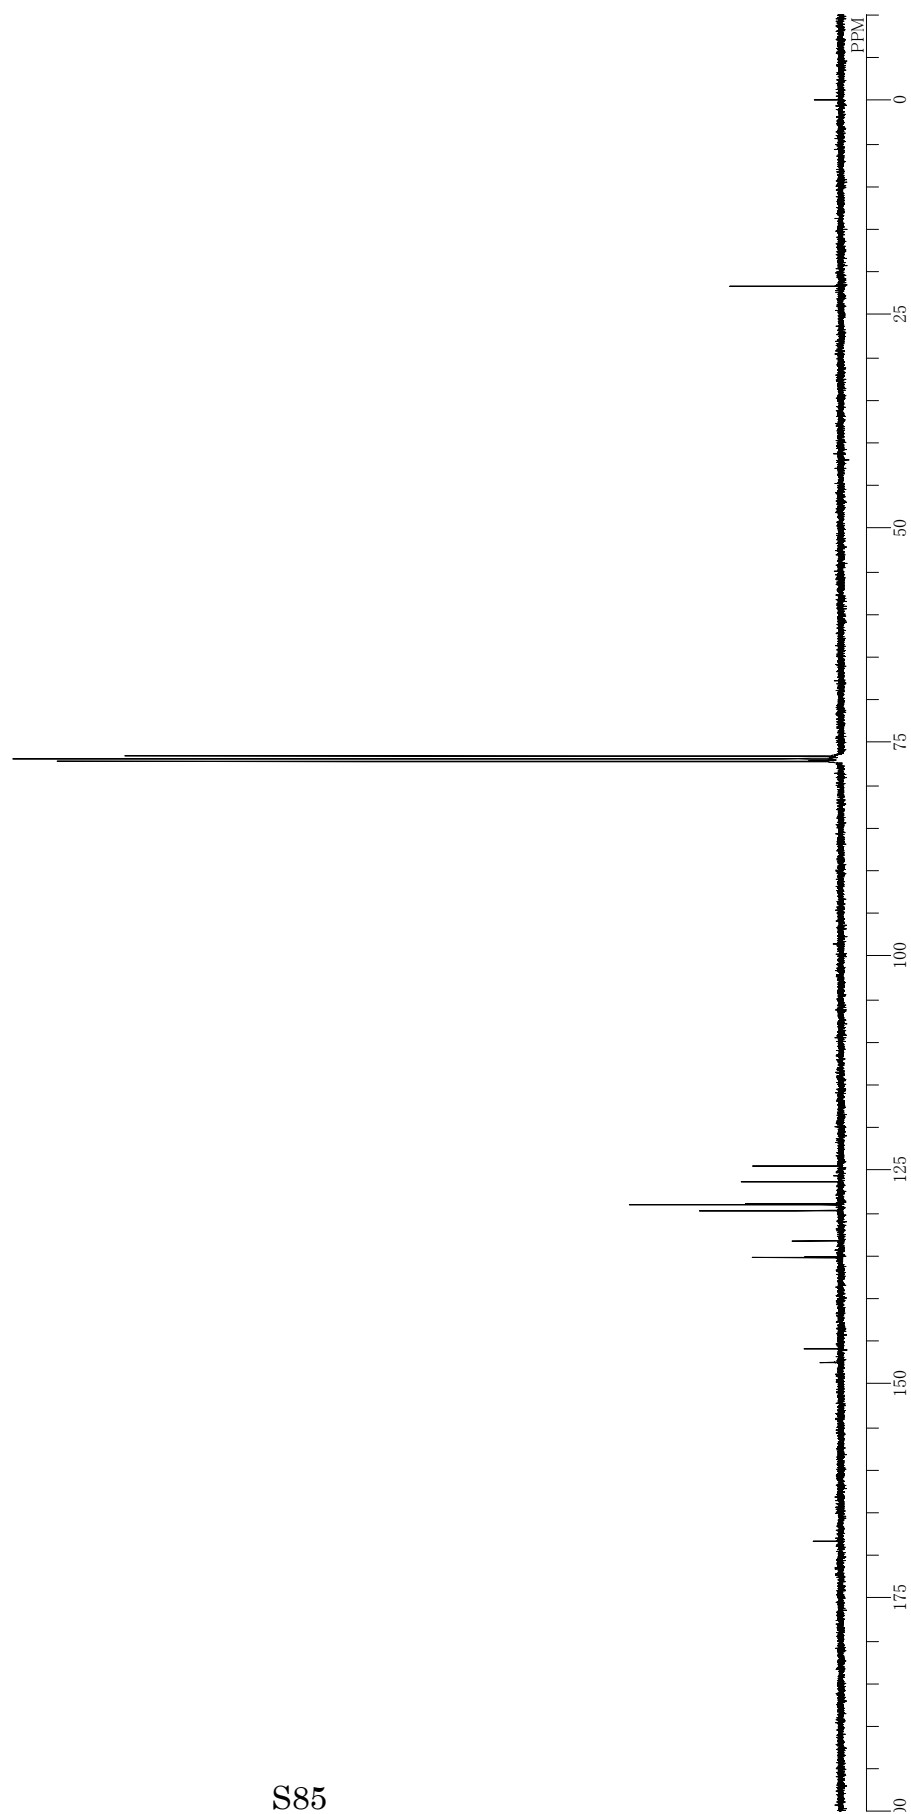

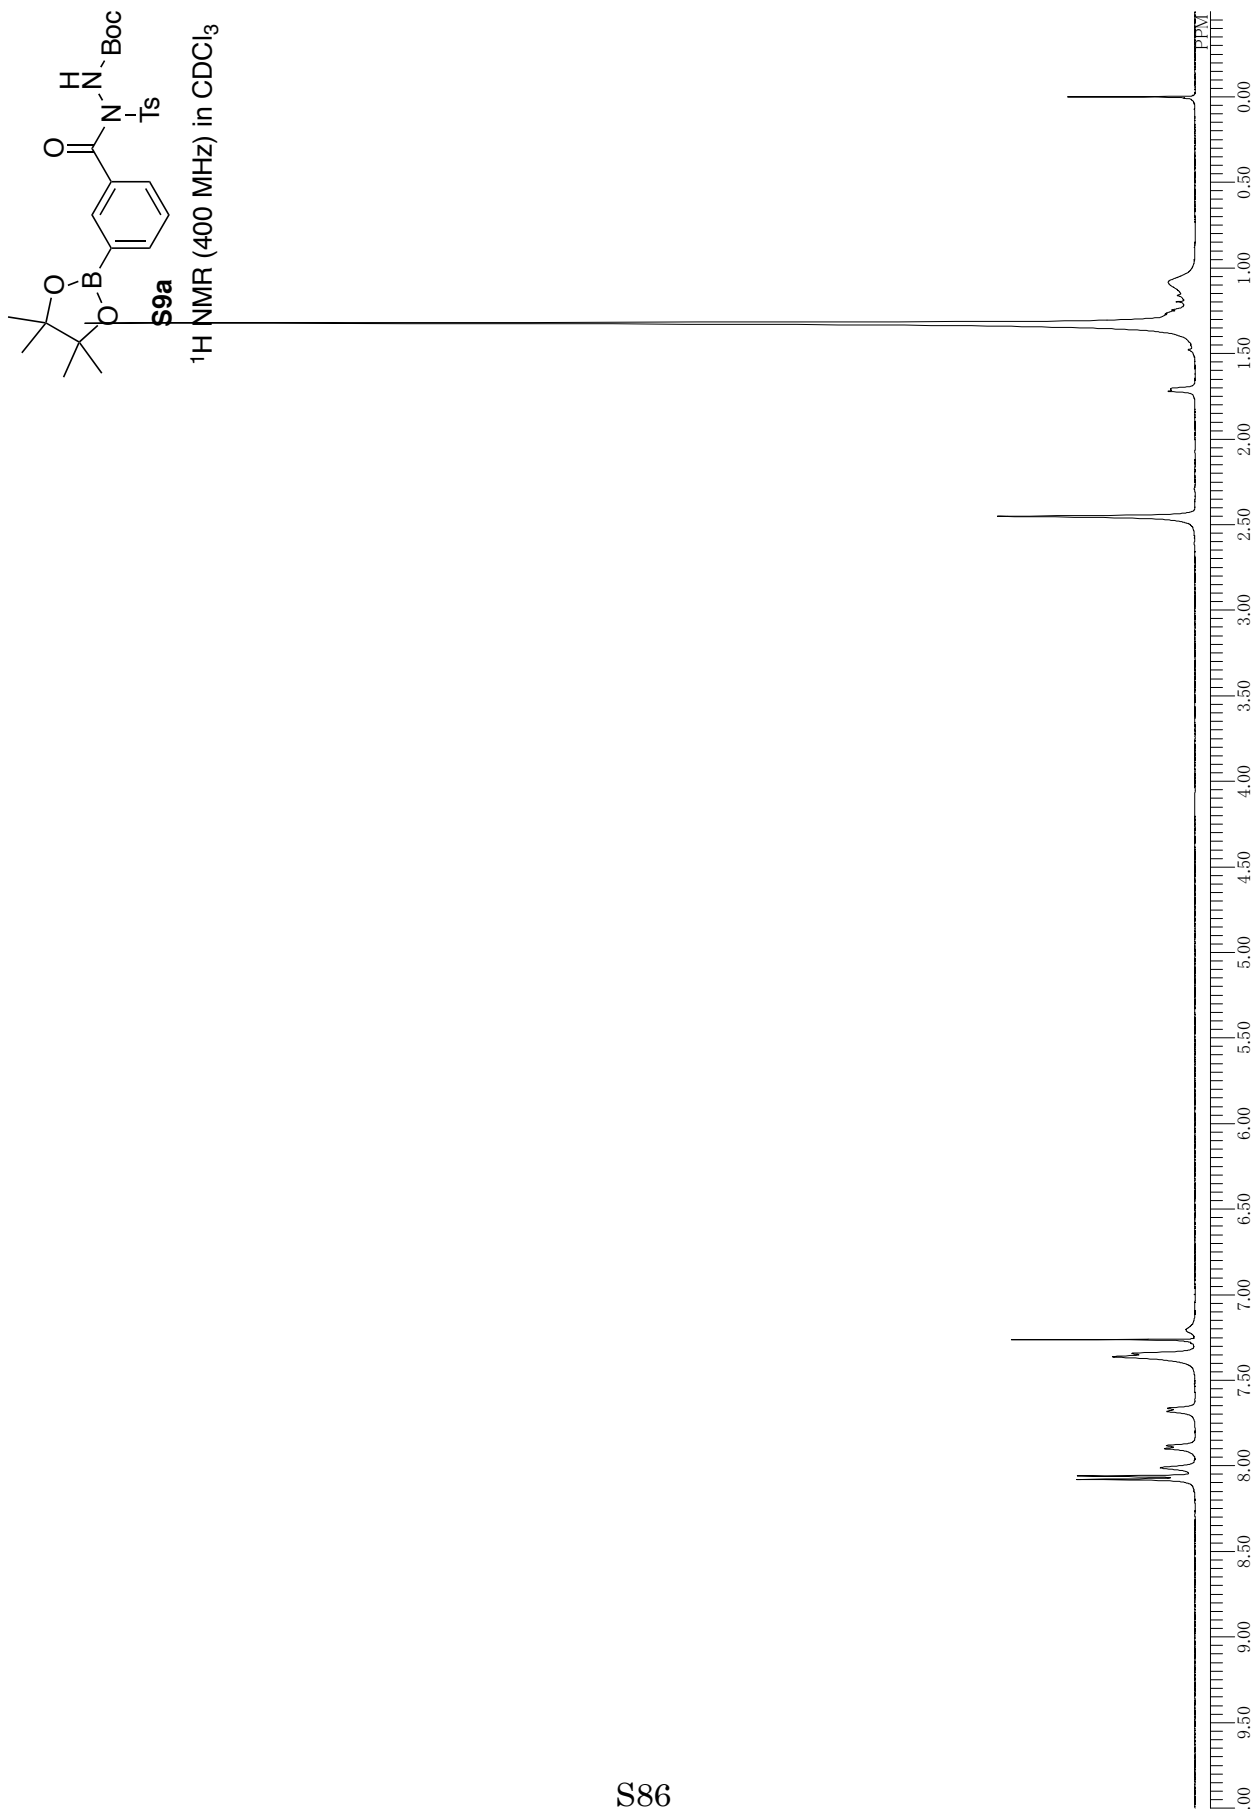

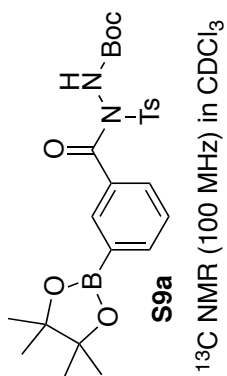 $^{13}\text{C}$  NMR (100 MHz) in  $\text{CDCl}_3$ 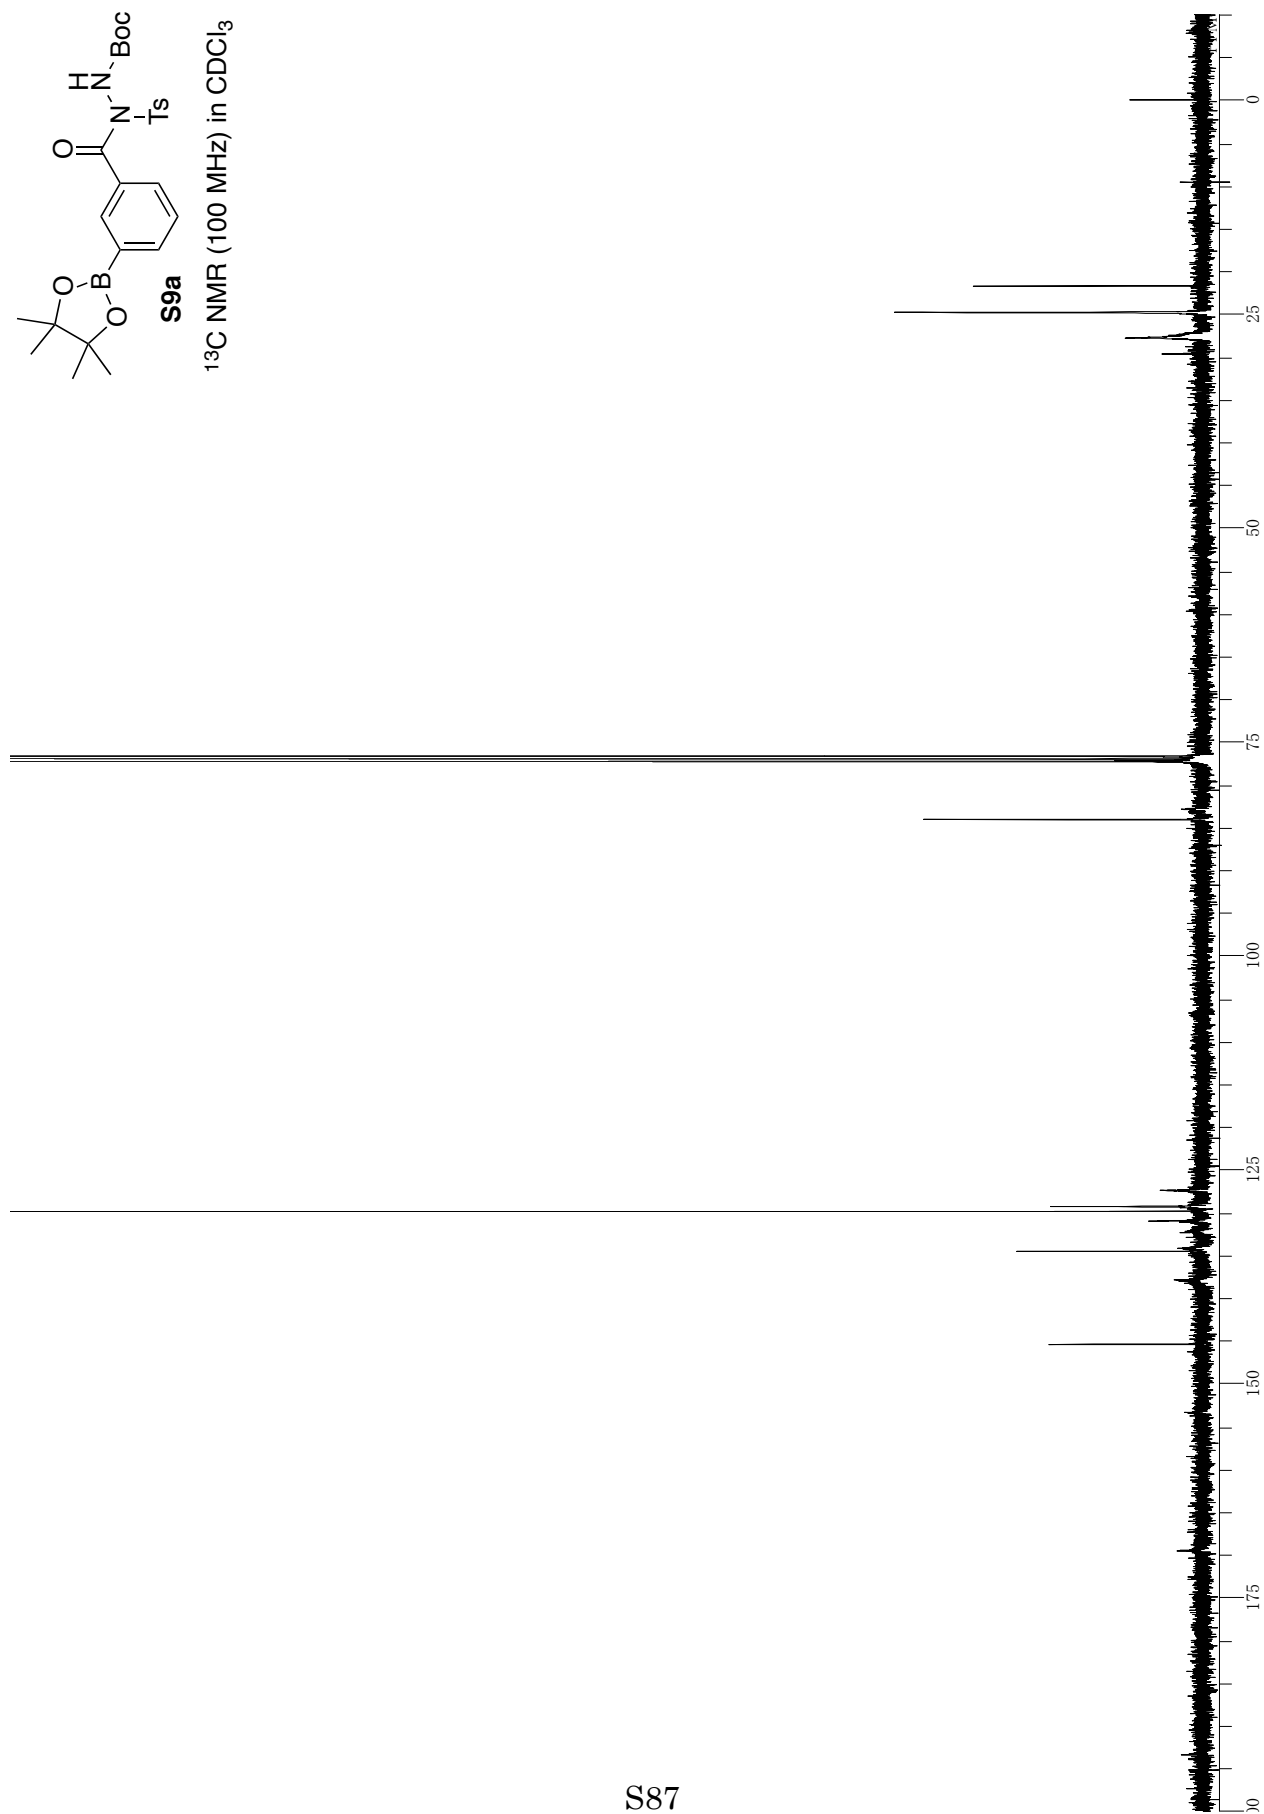

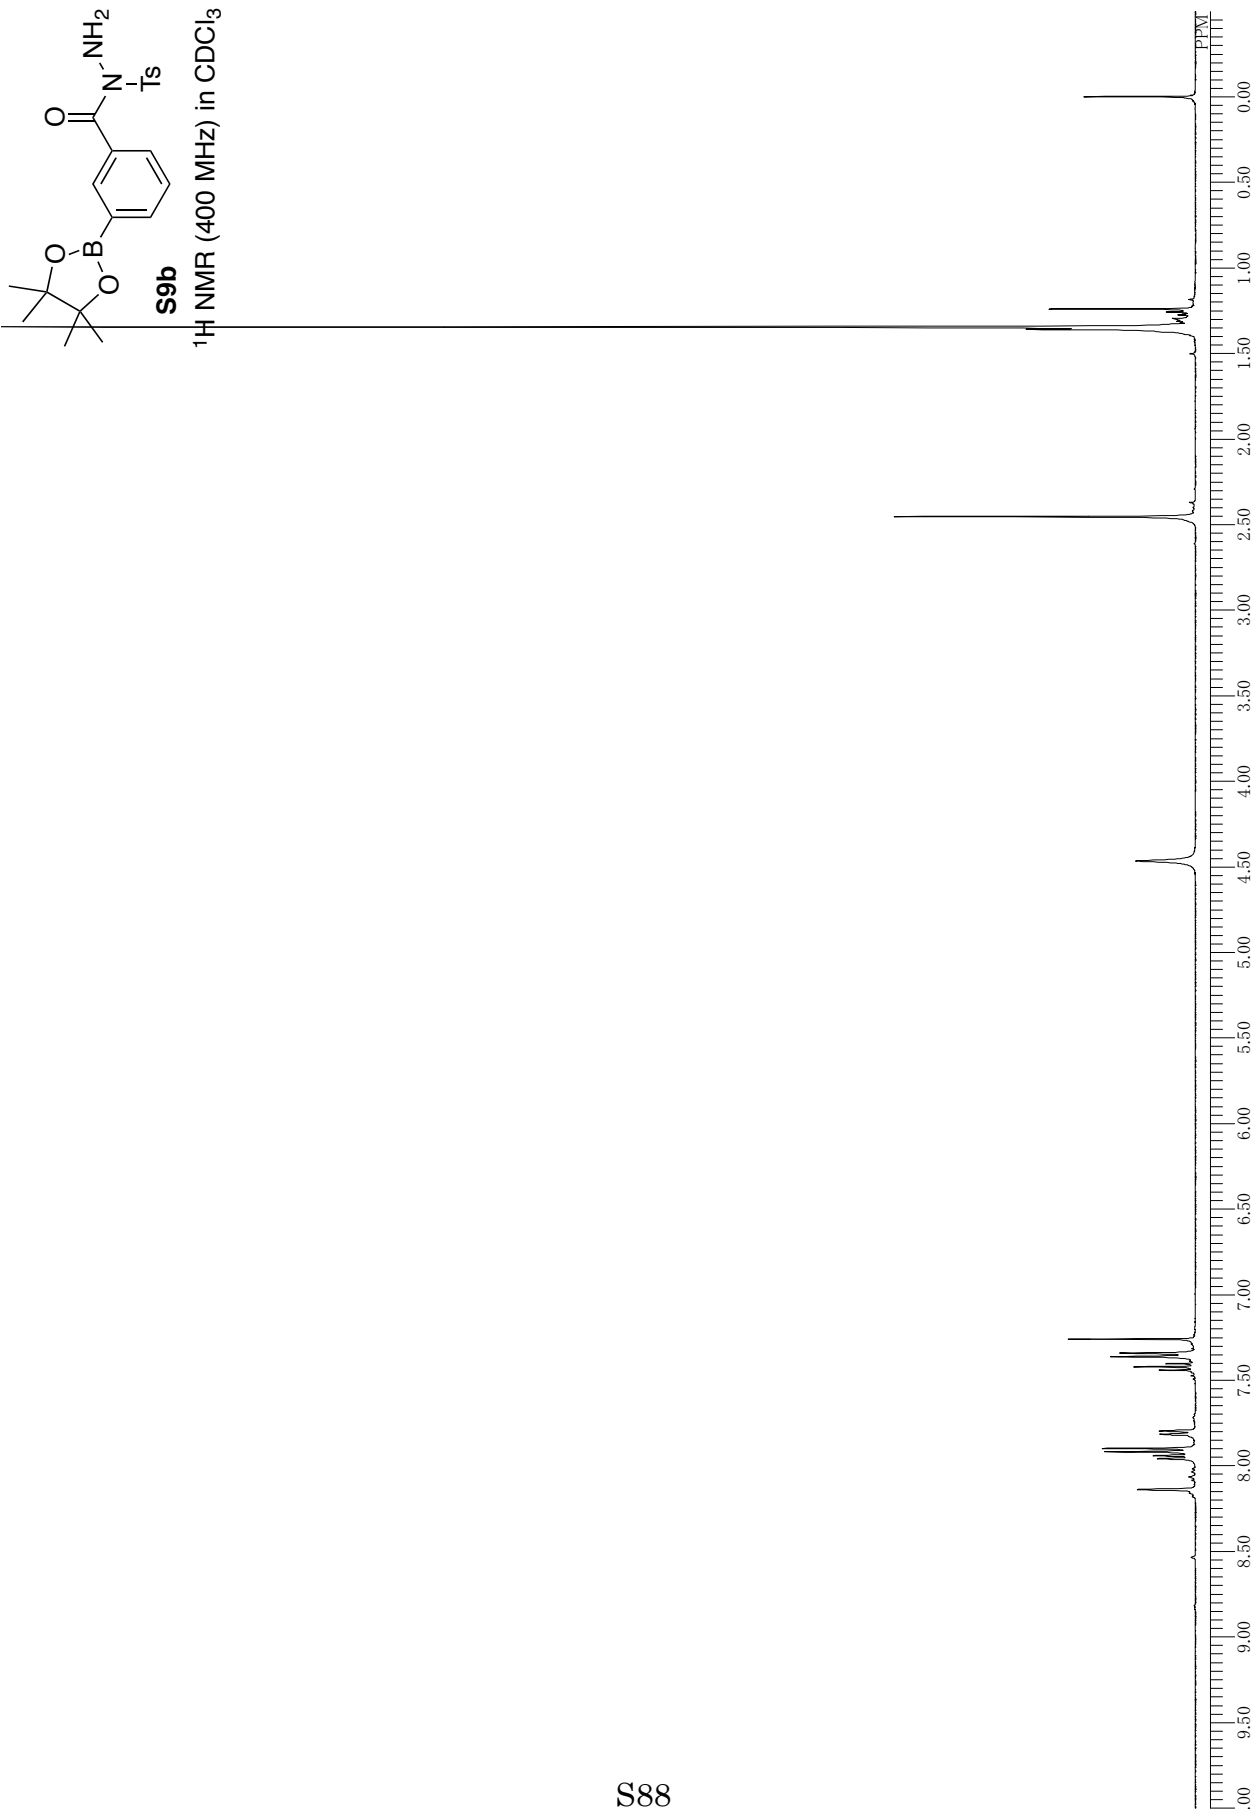

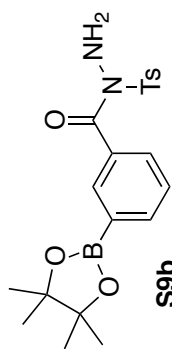

**S9b**

$^{13}\text{C}$  NMR (100 MHz) in  $\text{CDCl}_3$

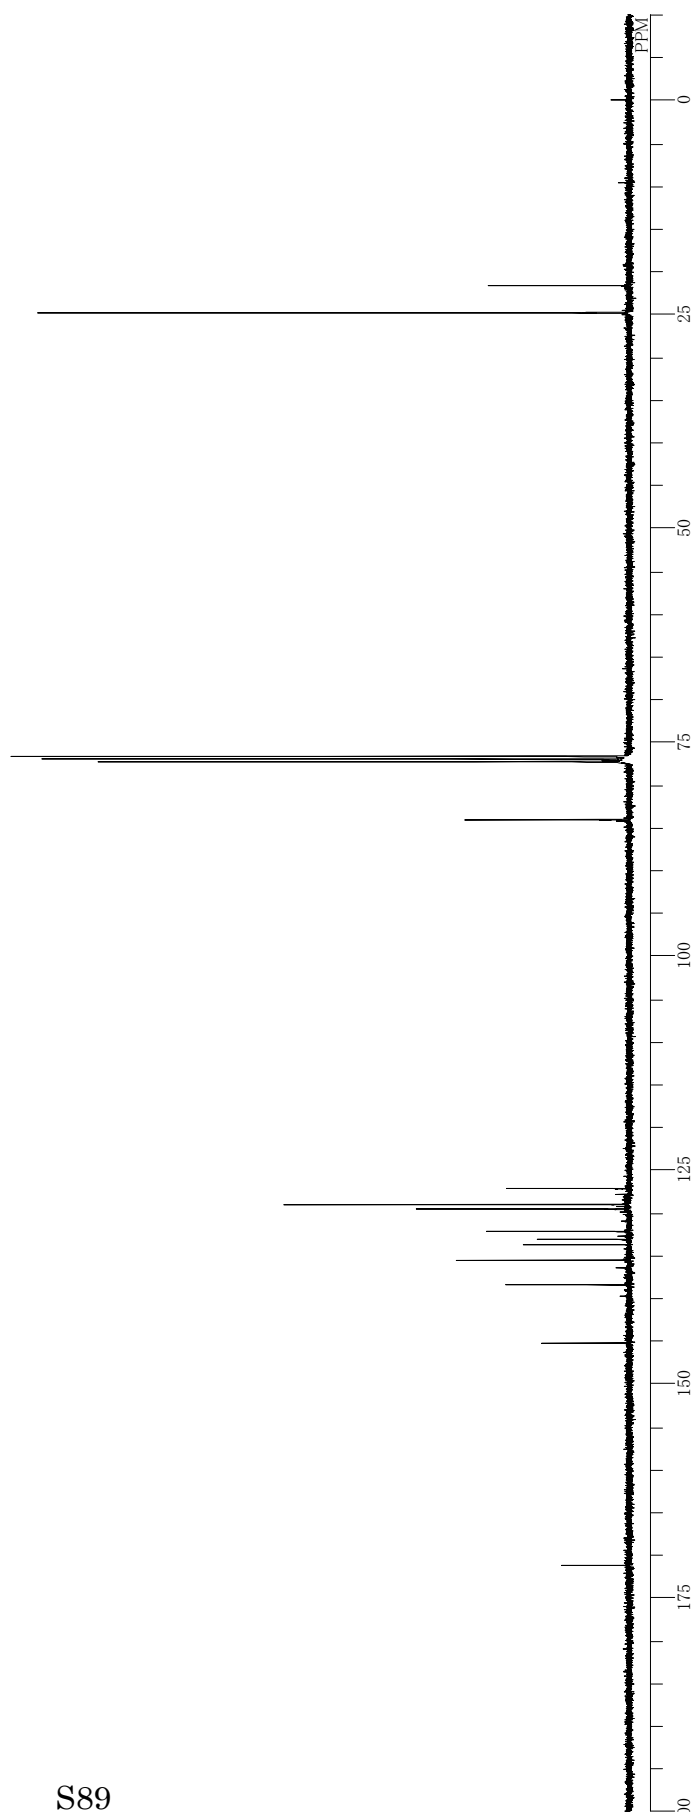

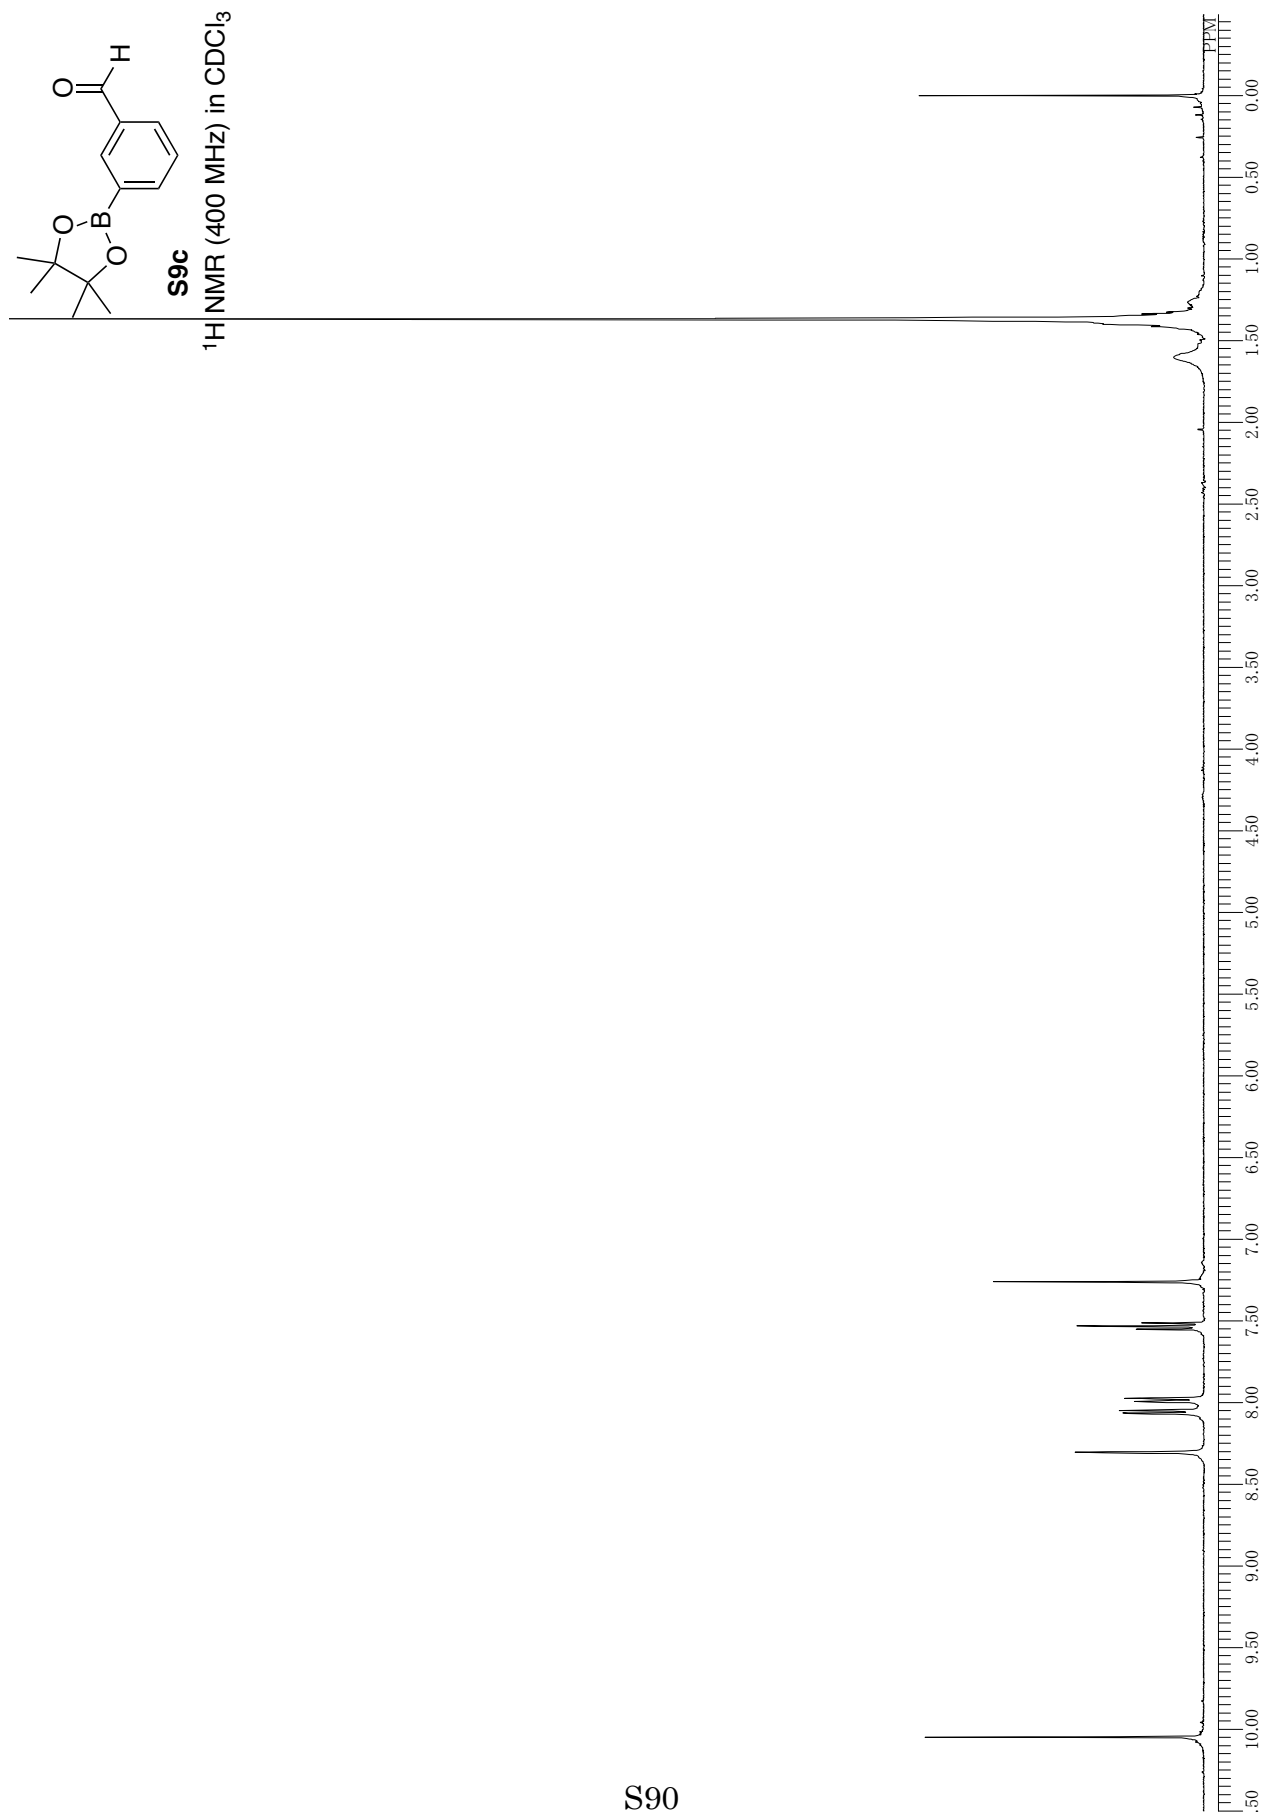

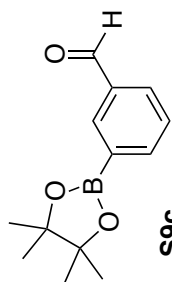

**S9c**

$^{13}\text{C}$  NMR (100 MHz) in  $\text{CDCl}_3$

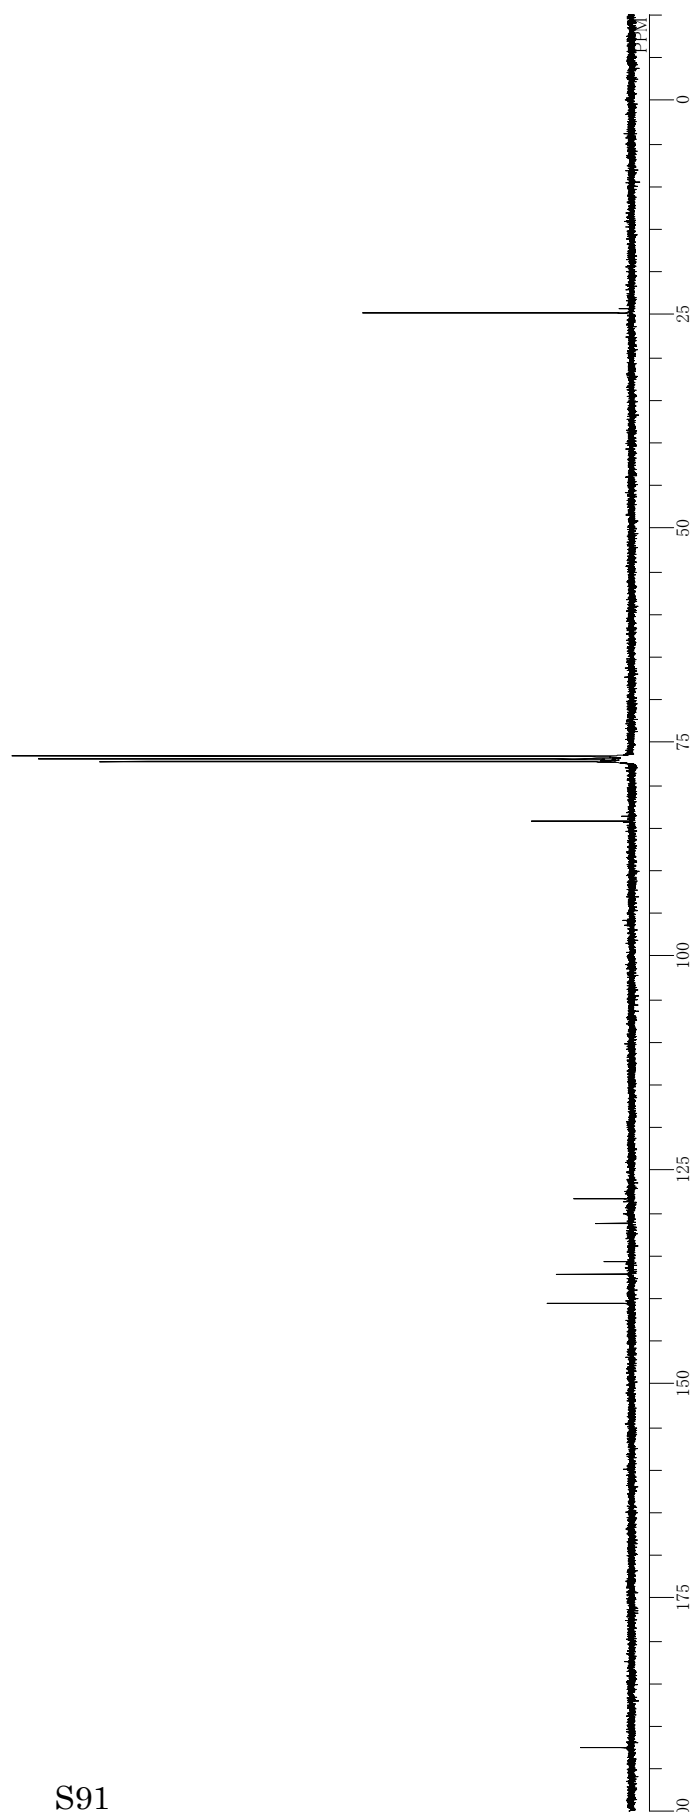

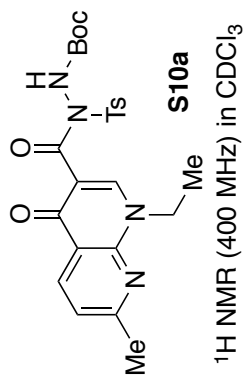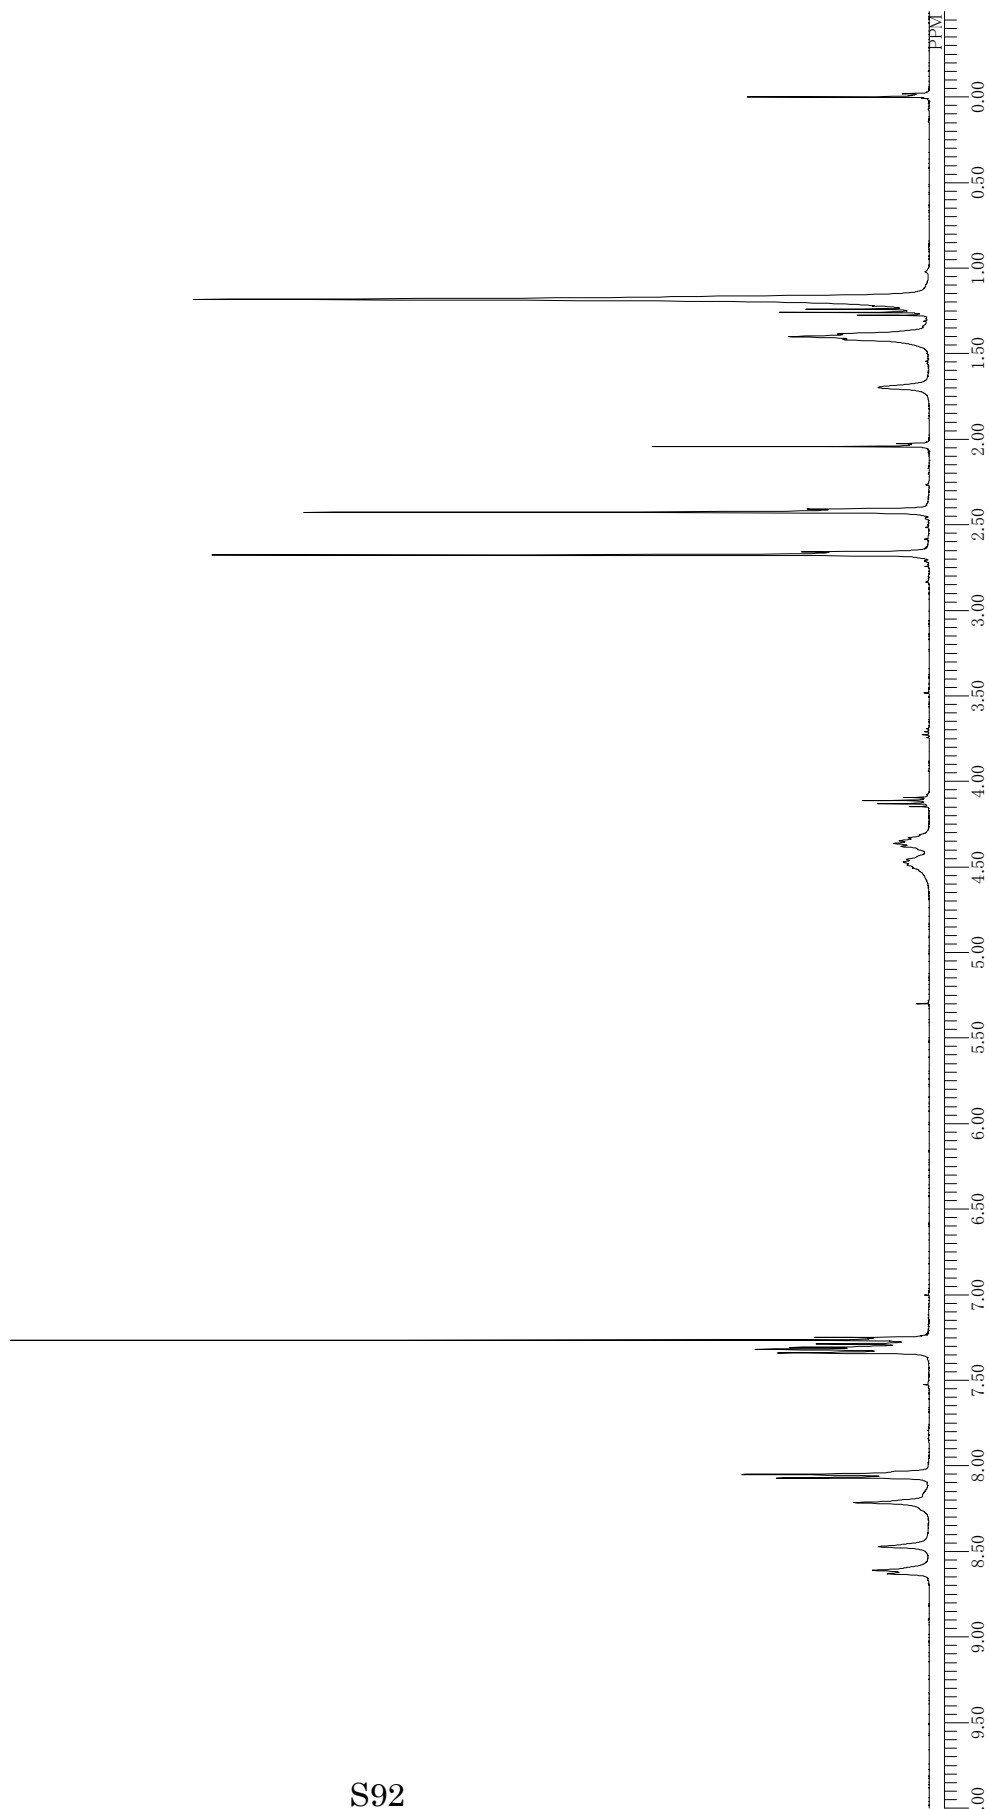



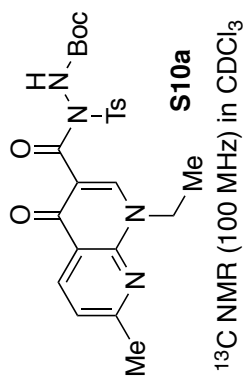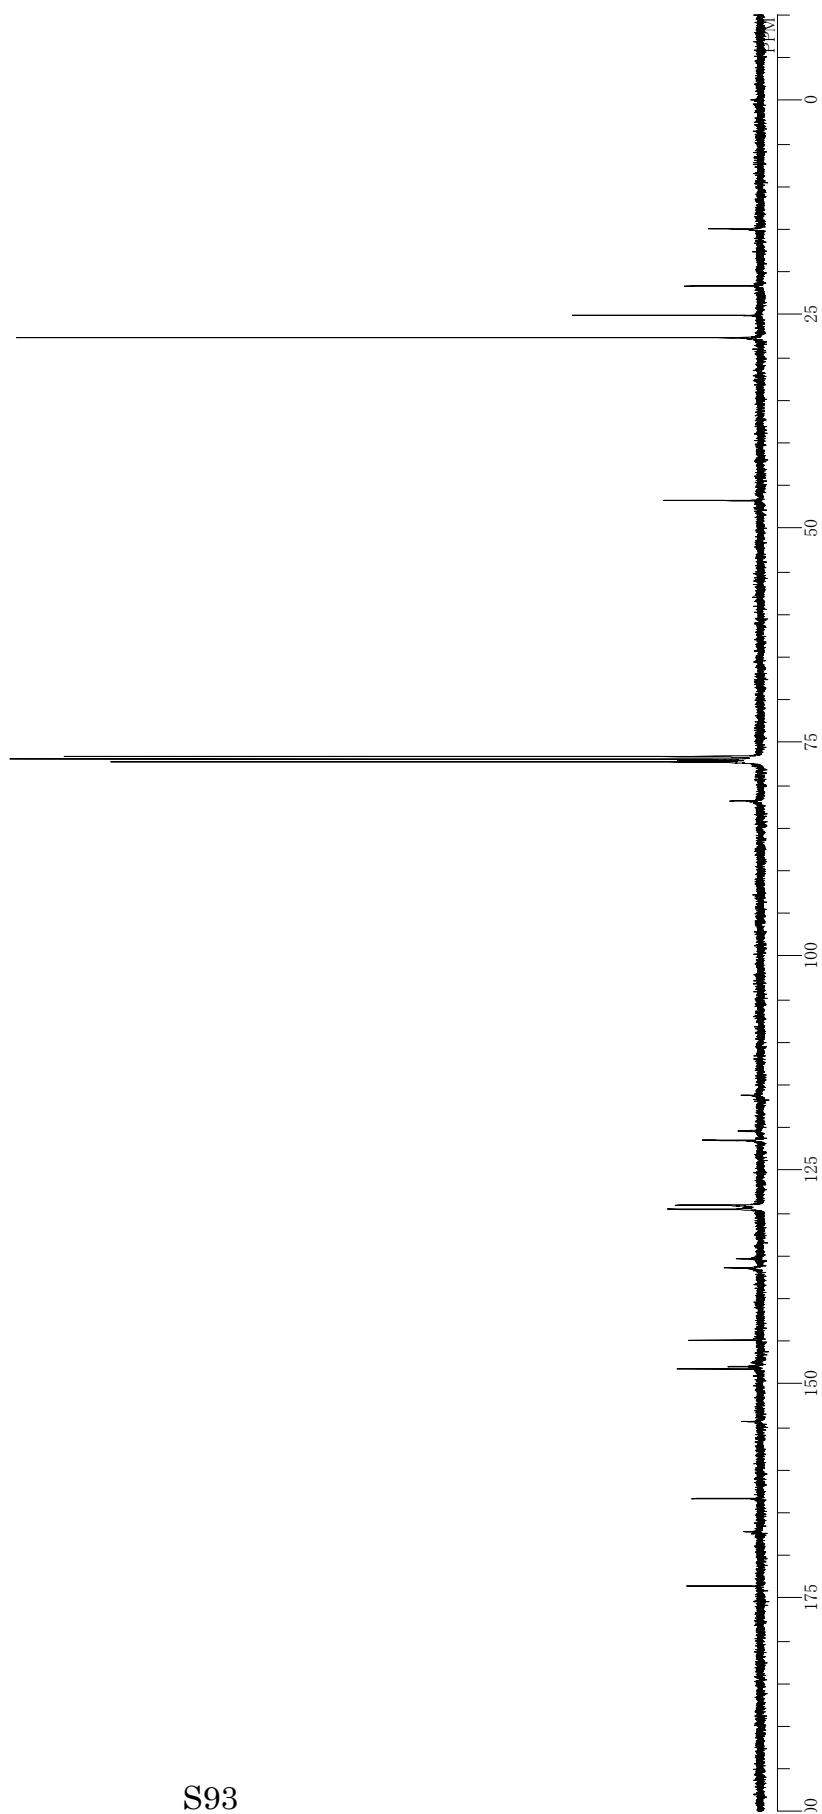

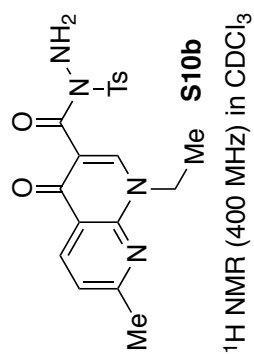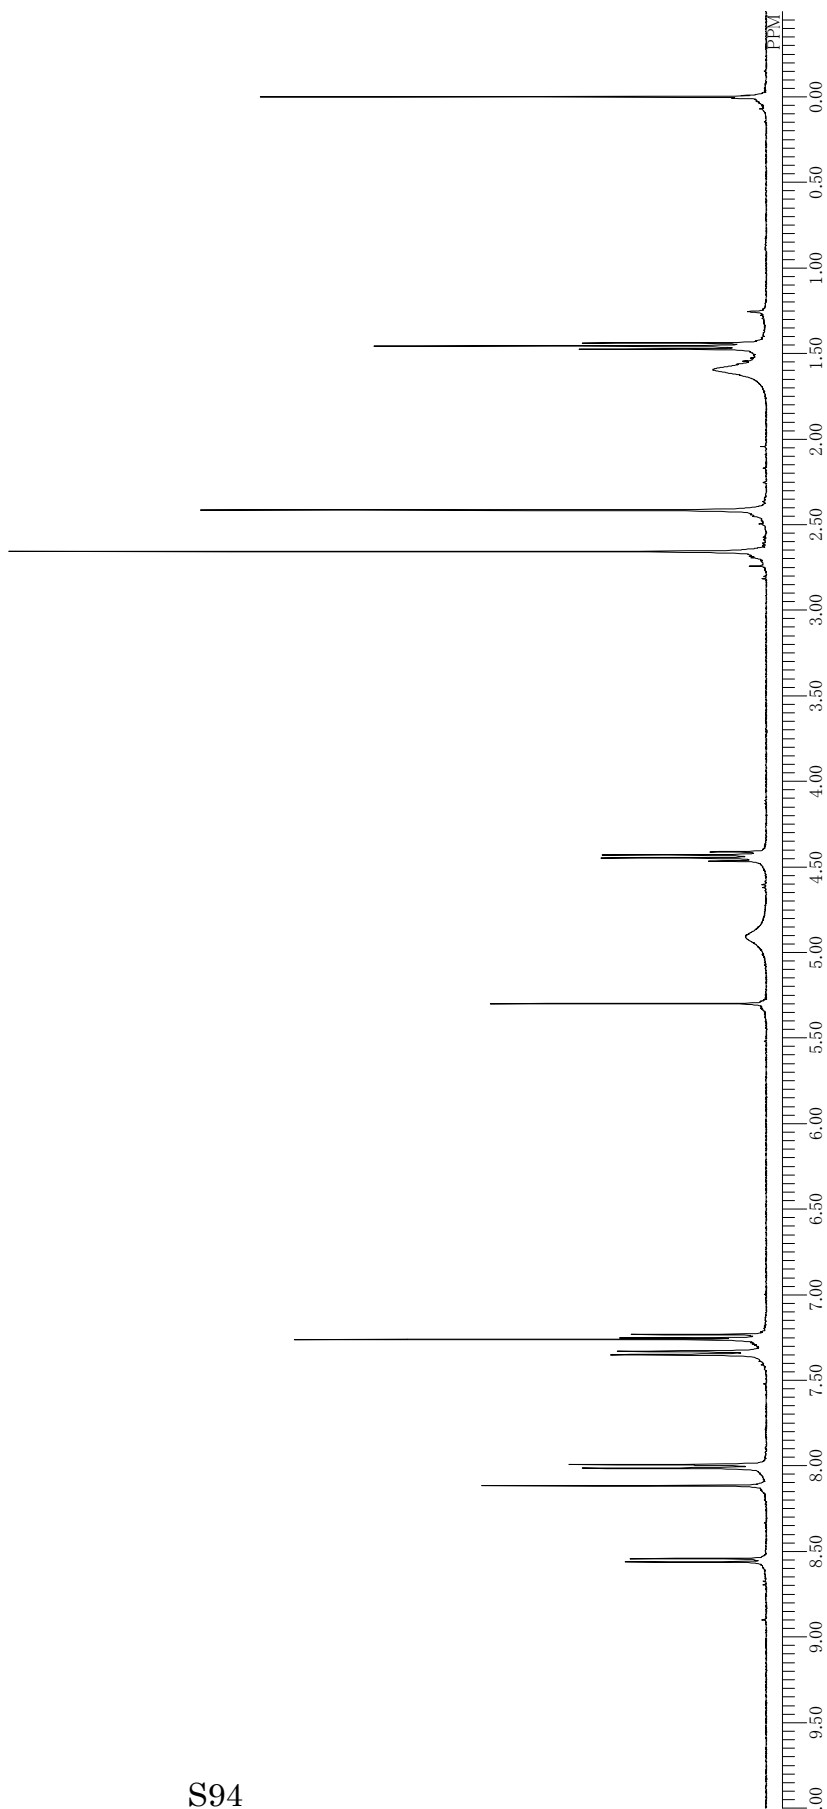

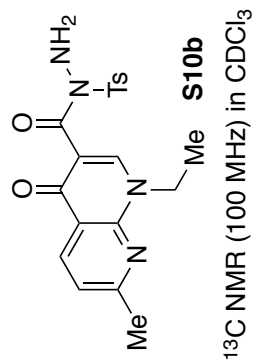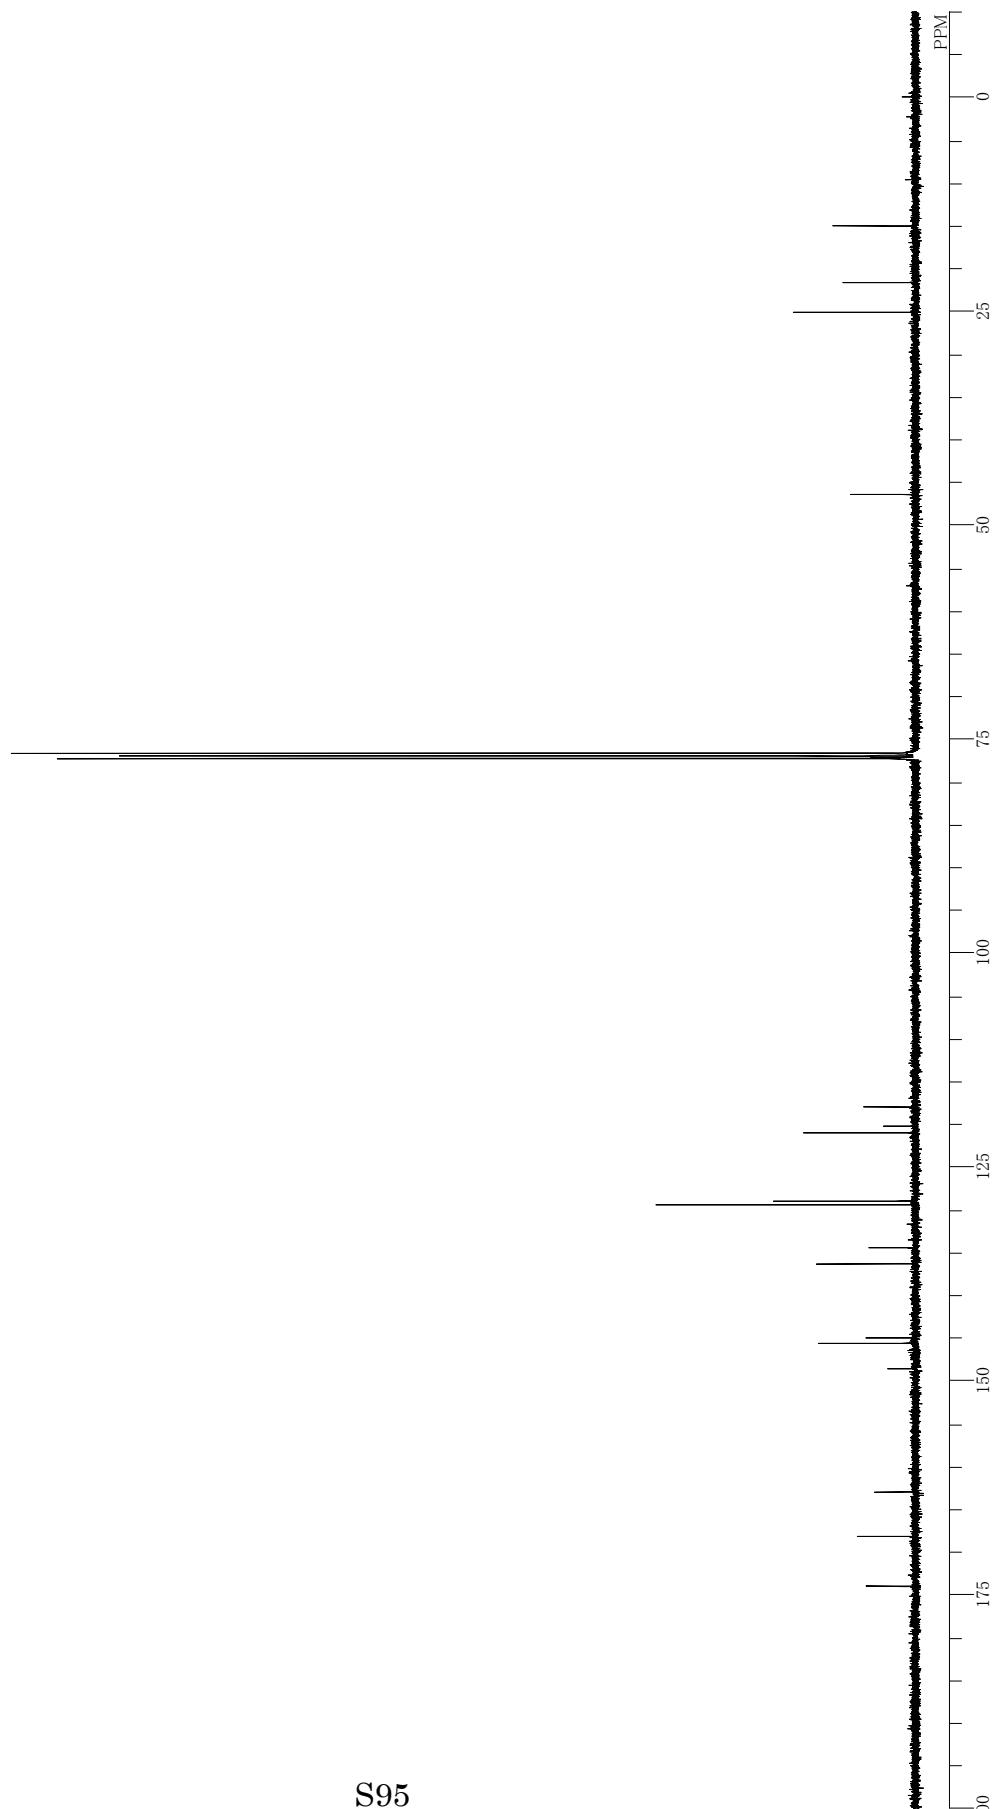

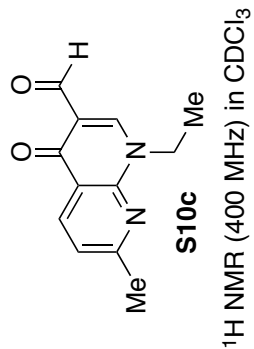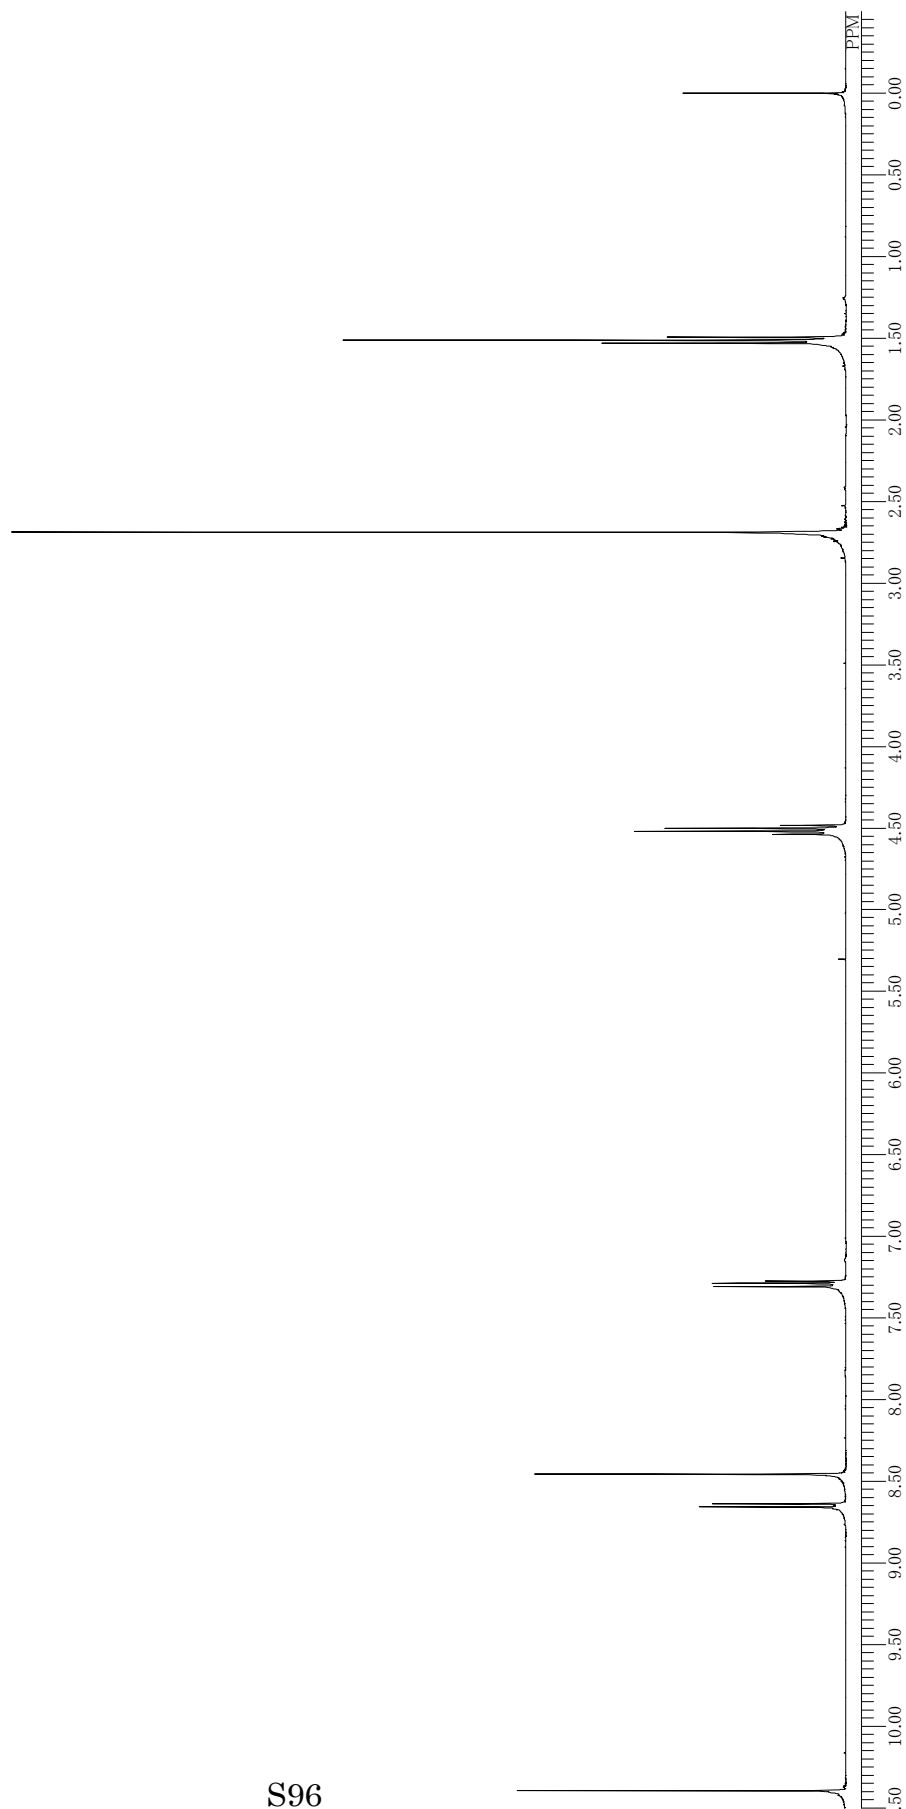

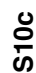 $^{13}\text{C}$  NMR (100 MHz) in  $\text{CDCl}_3$ 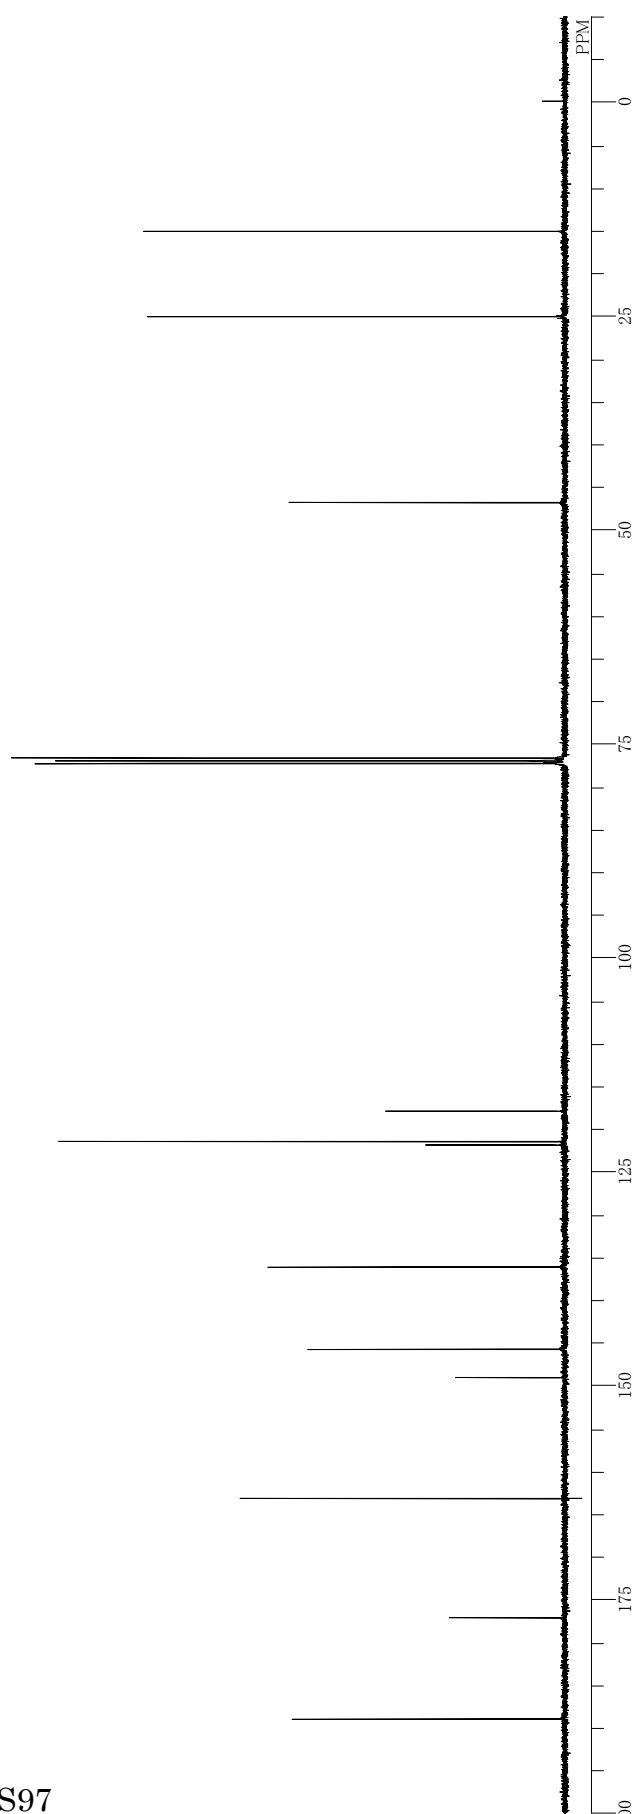

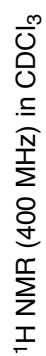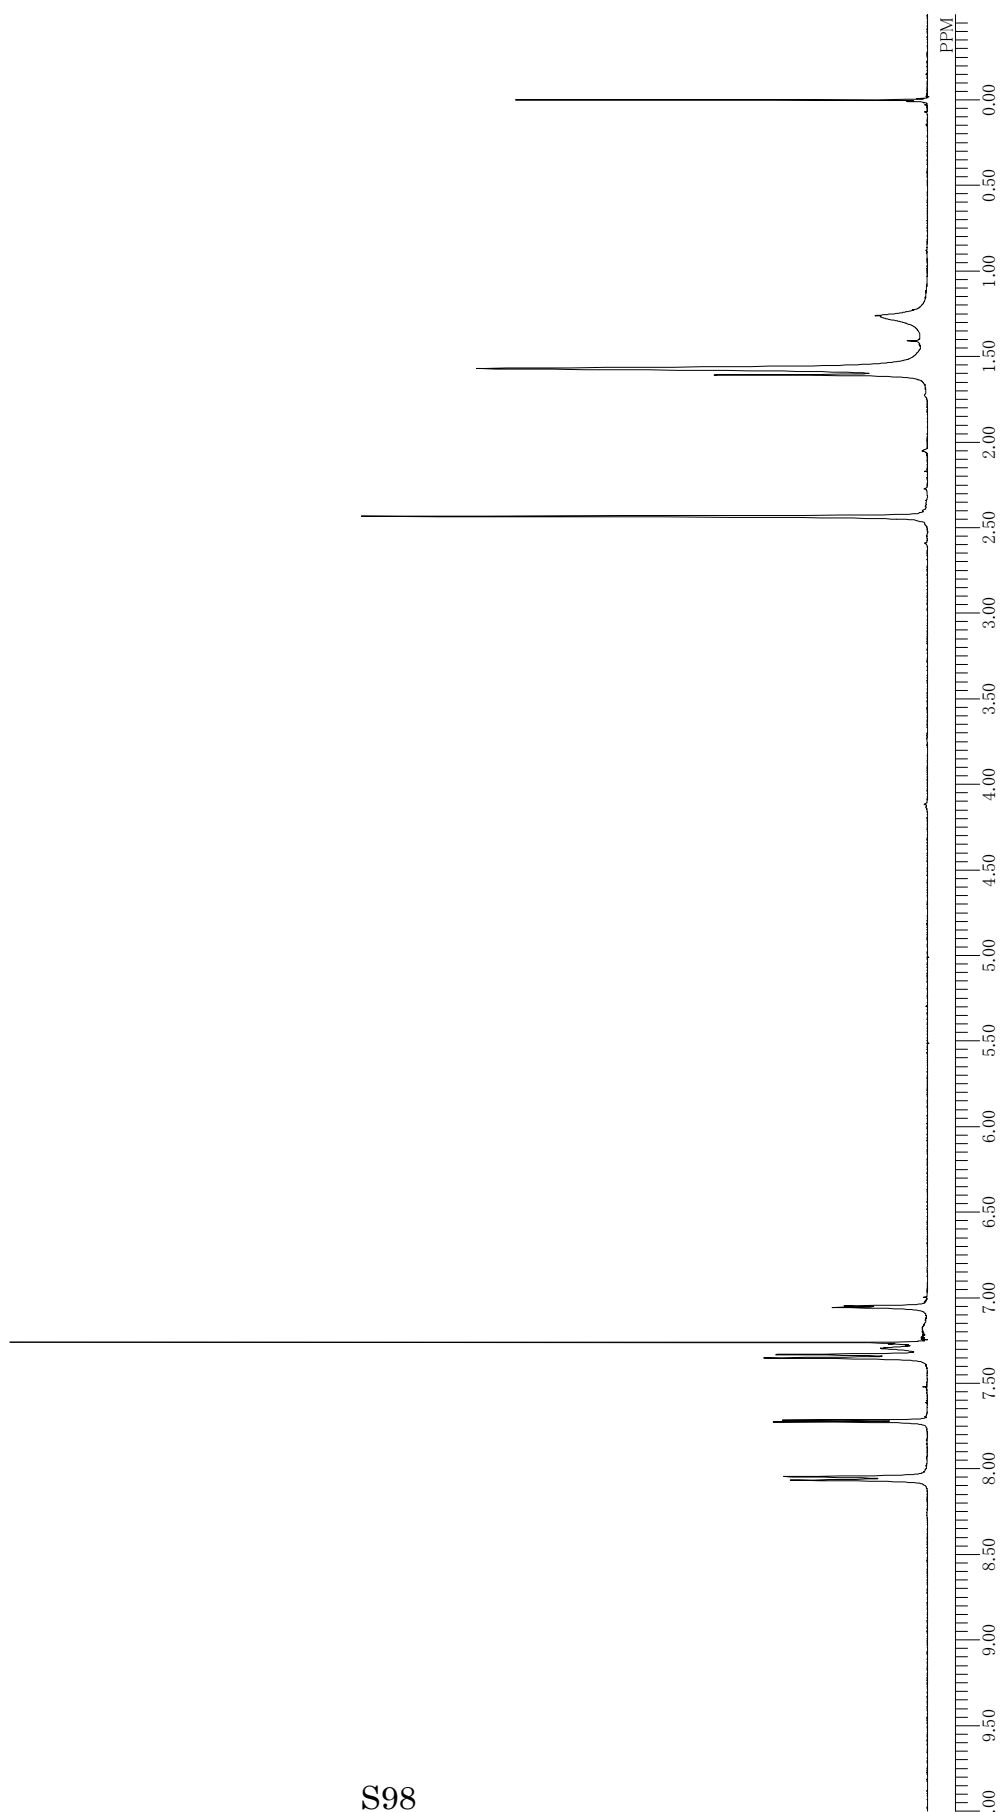

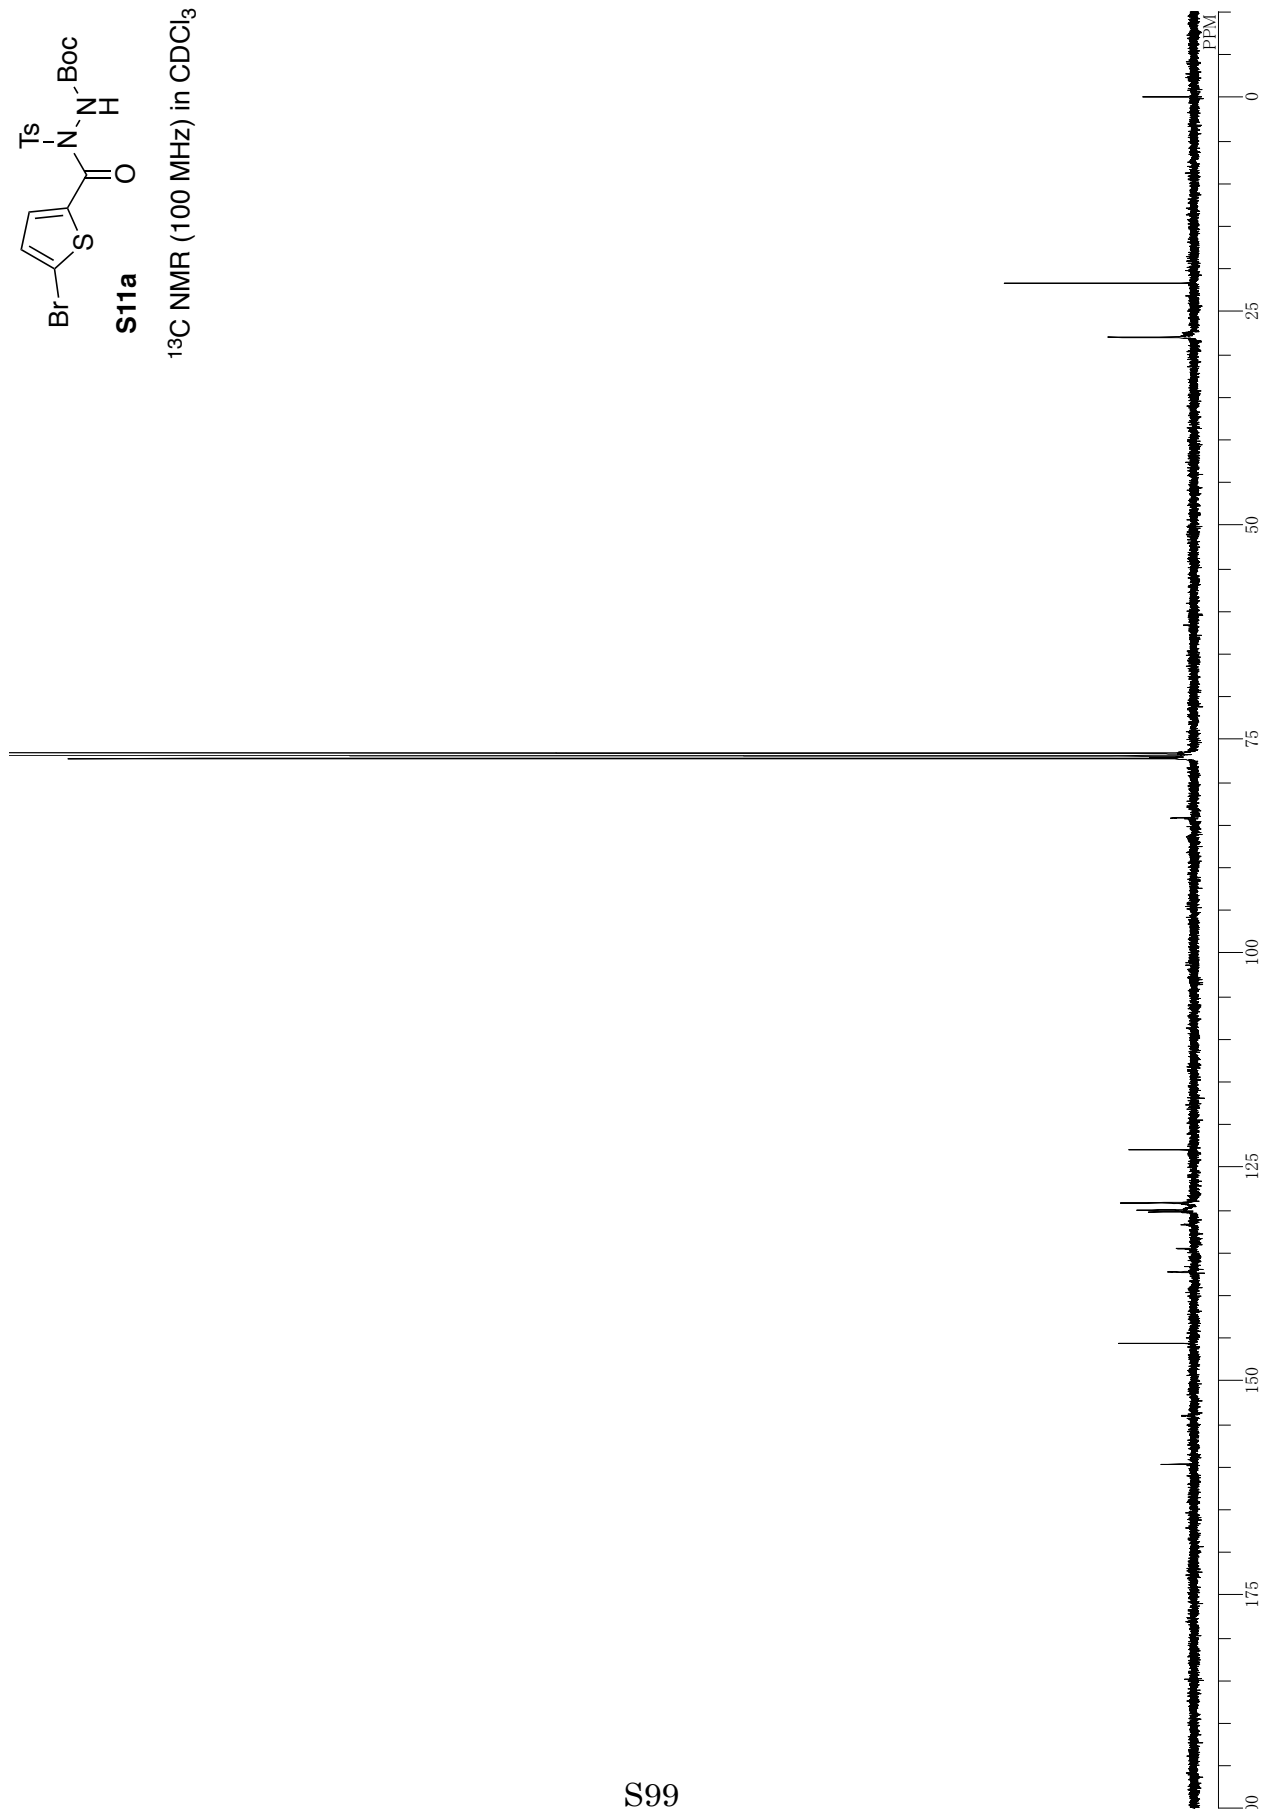

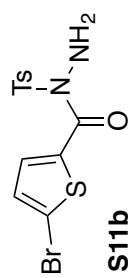

$^1\text{H}$  NMR (400 MHz) in  $\text{CDCl}_3$

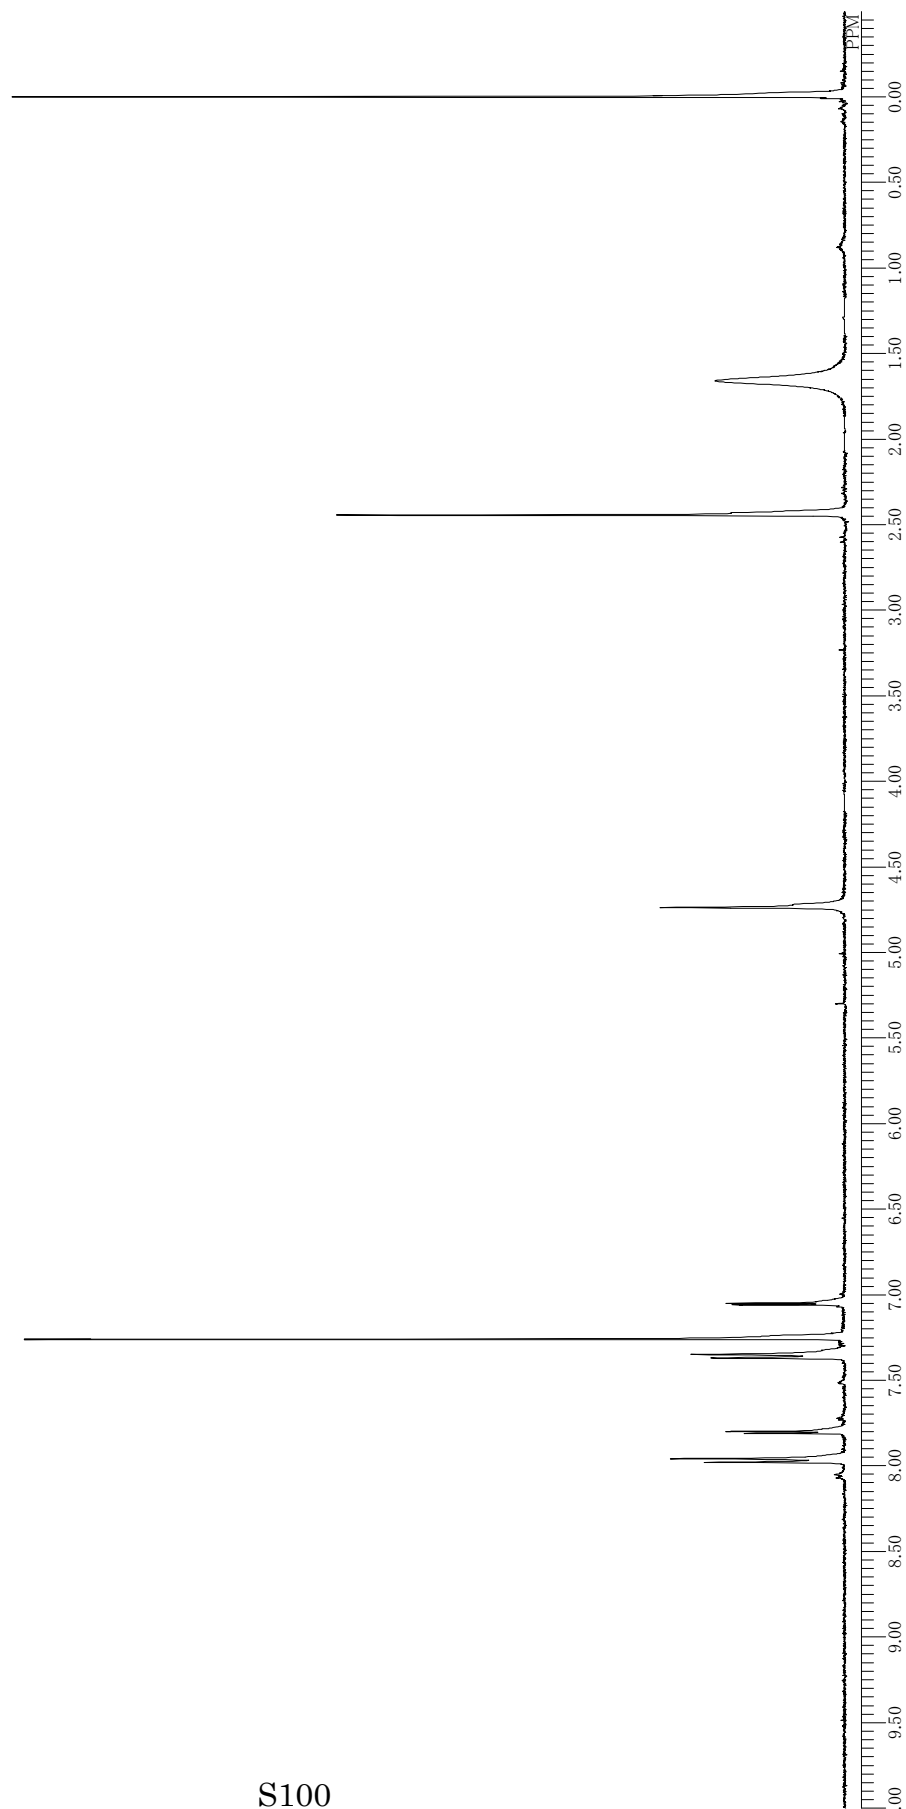



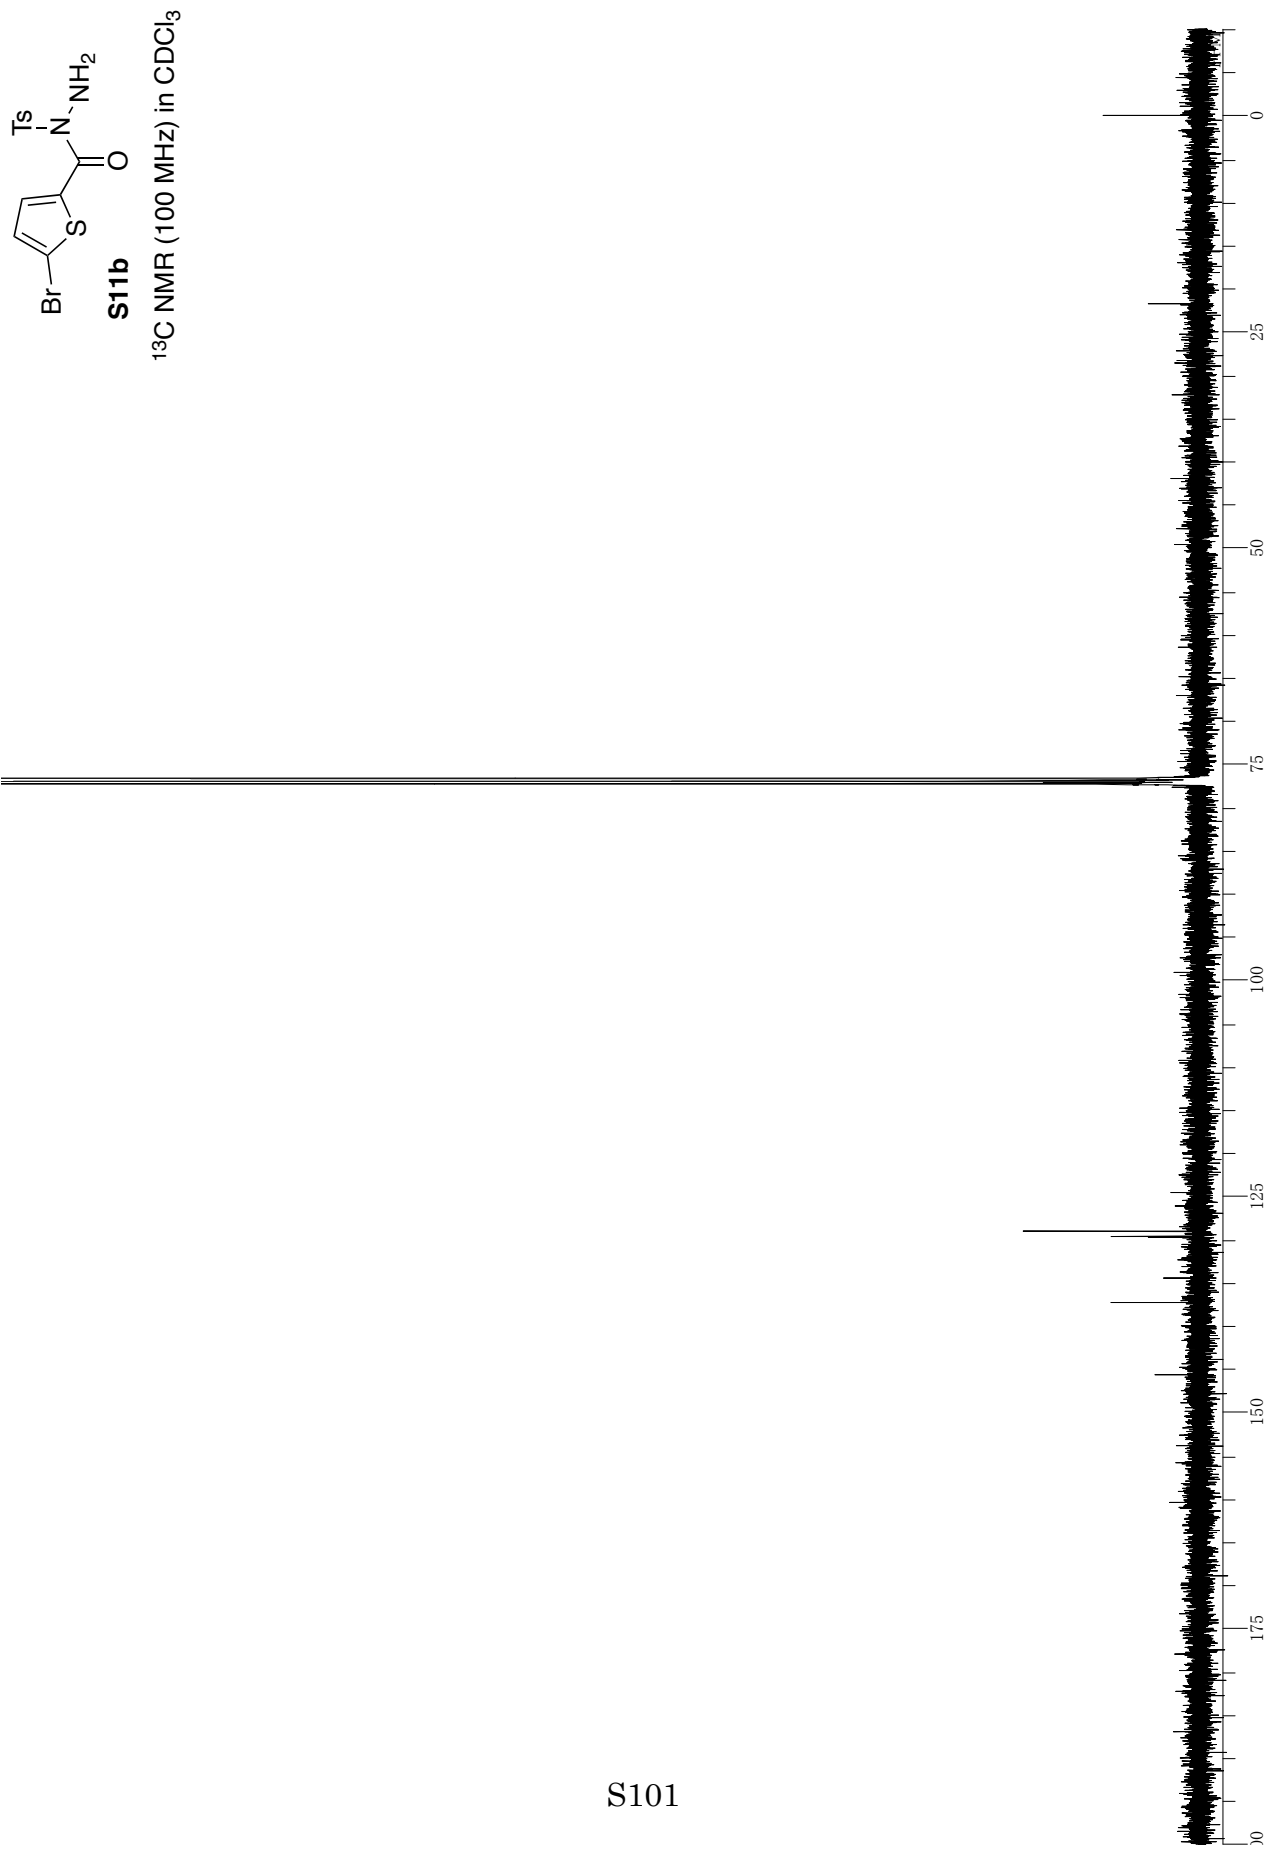

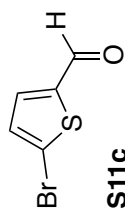

<sup>1</sup>H NMR (400 MHz) in CDCl<sub>3</sub>

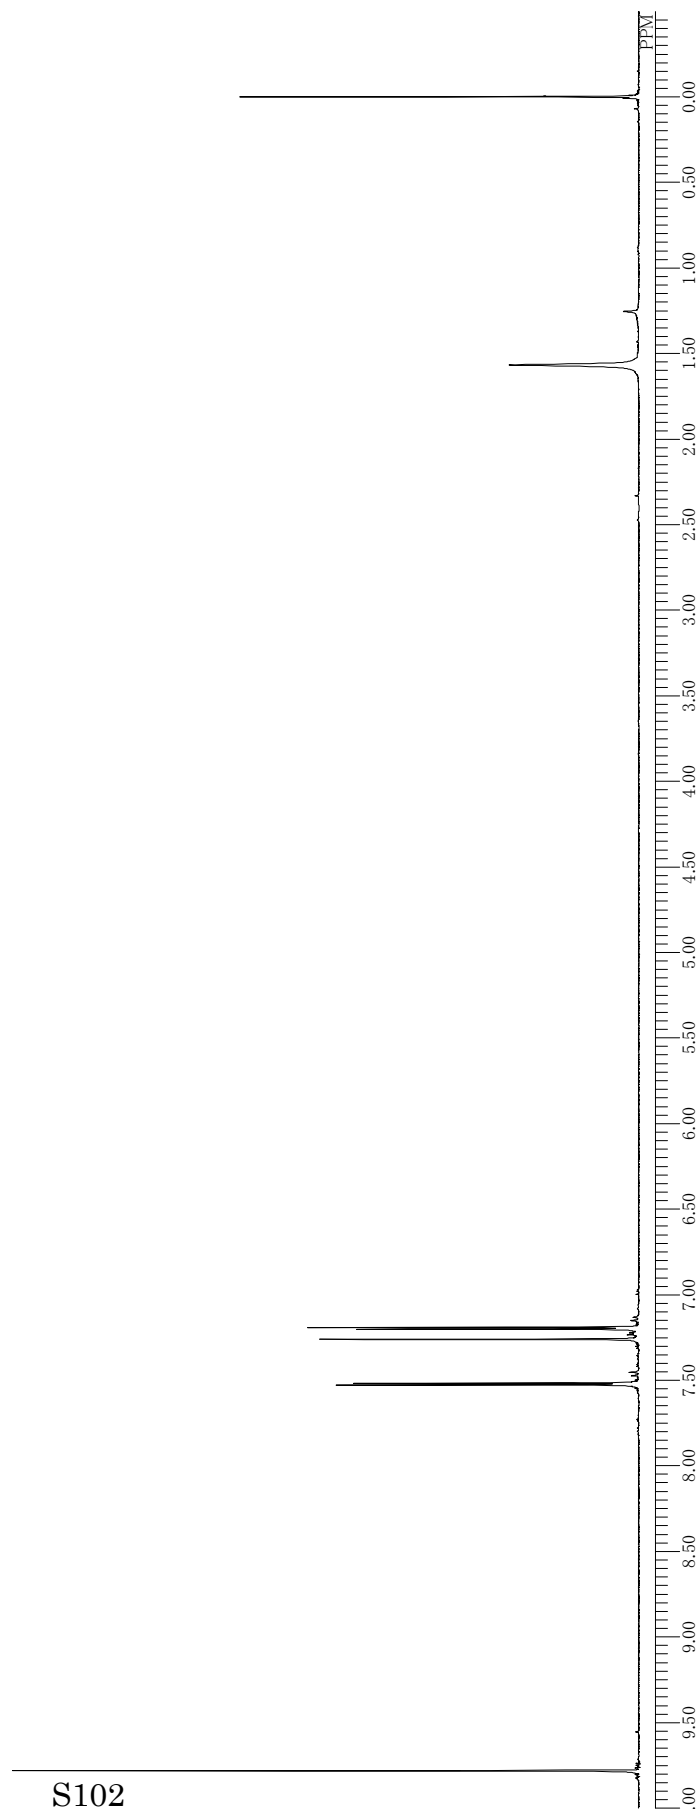

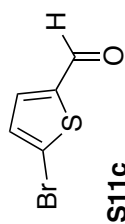

$^{13}\text{C}$  NMR (100 MHz) in  $\text{CDCl}_3$

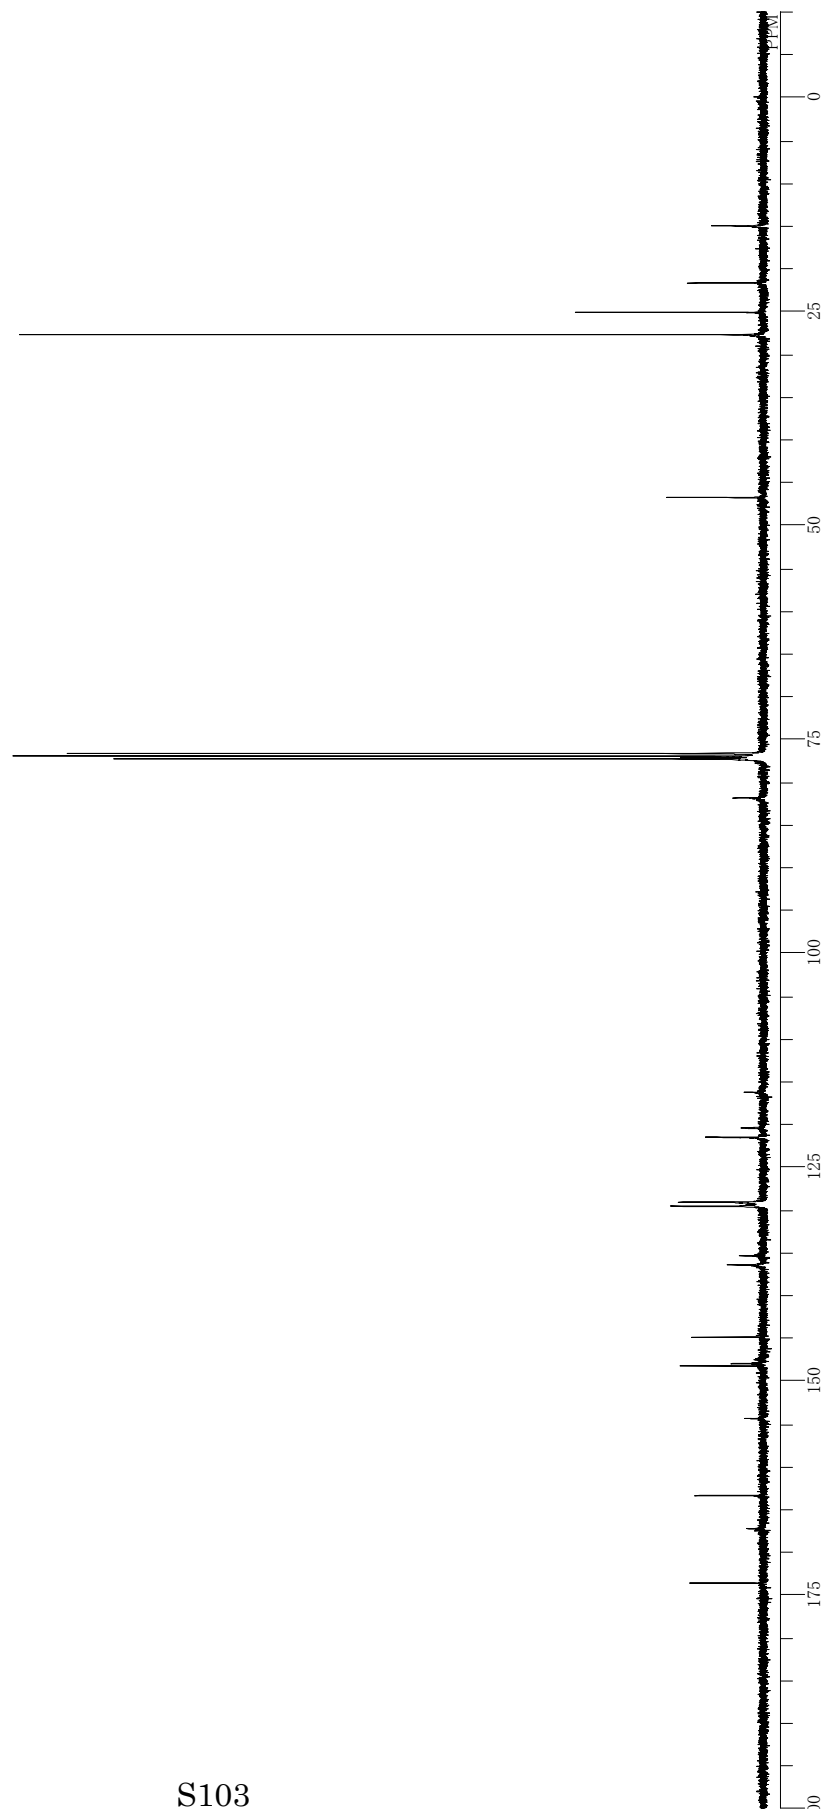

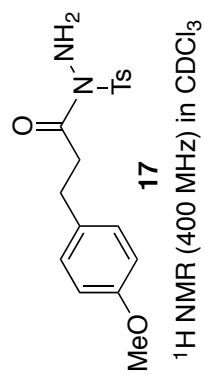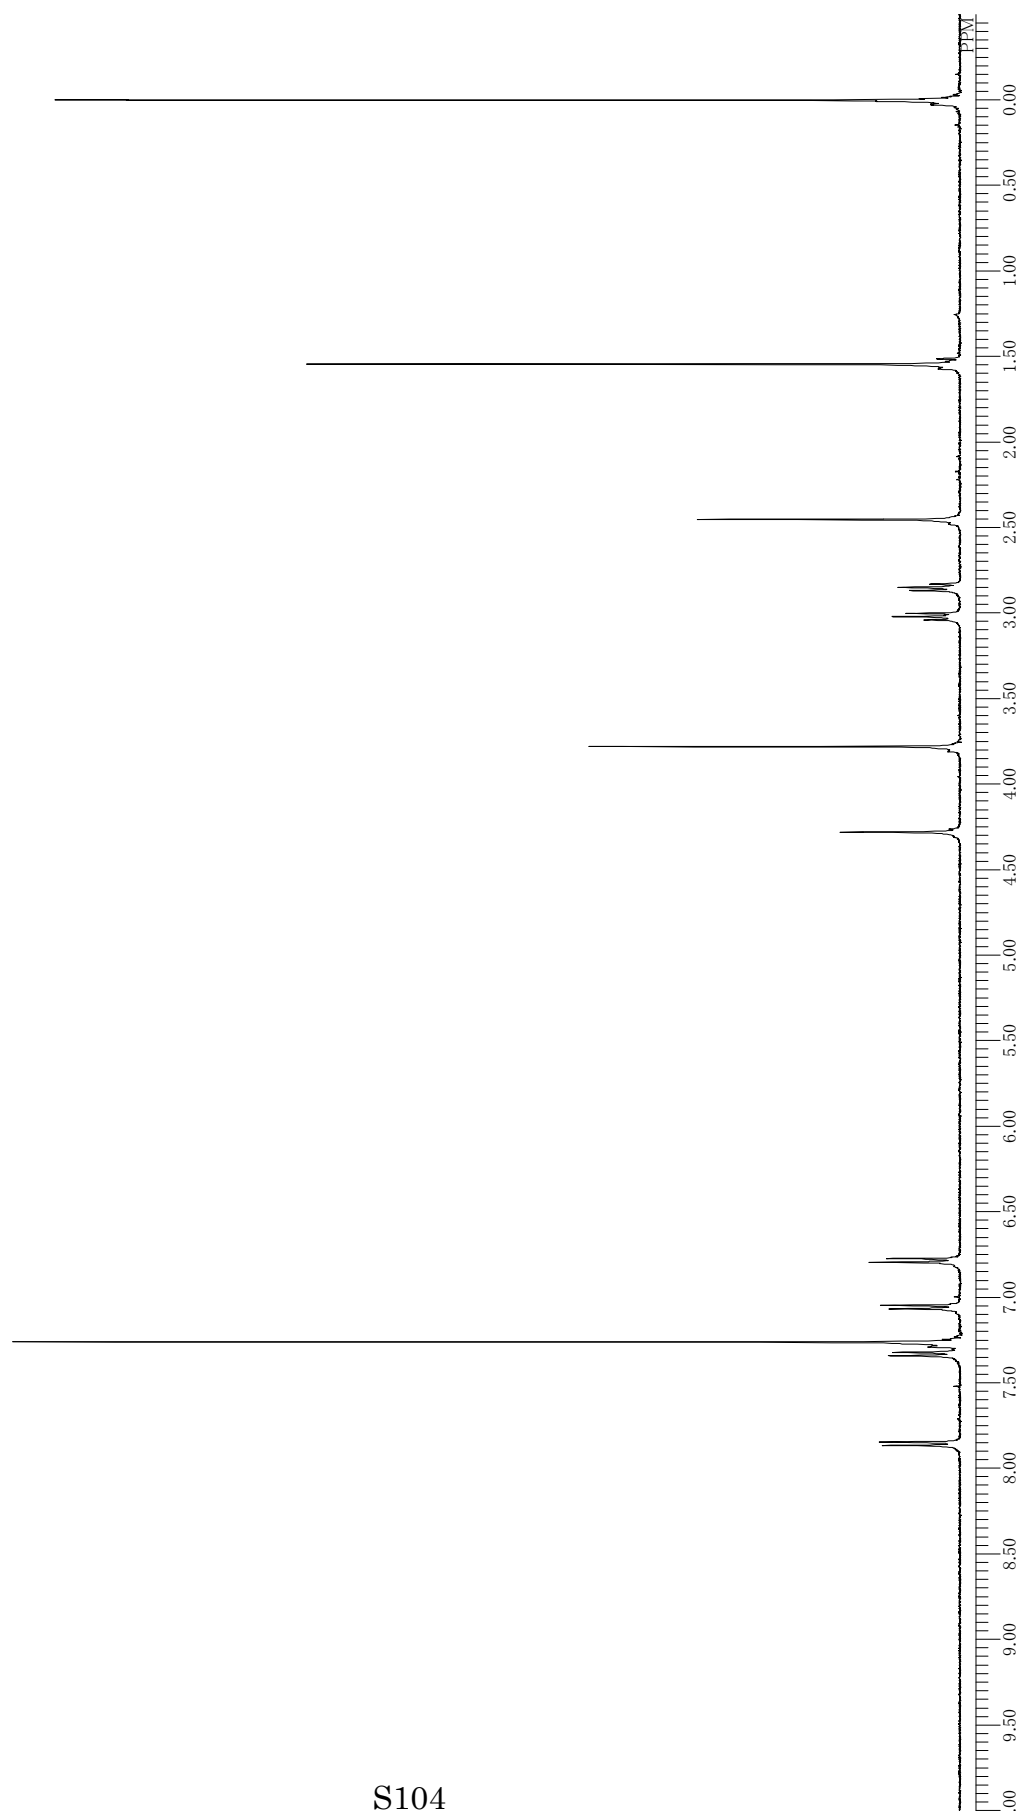

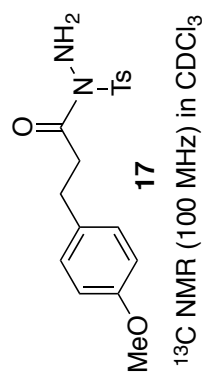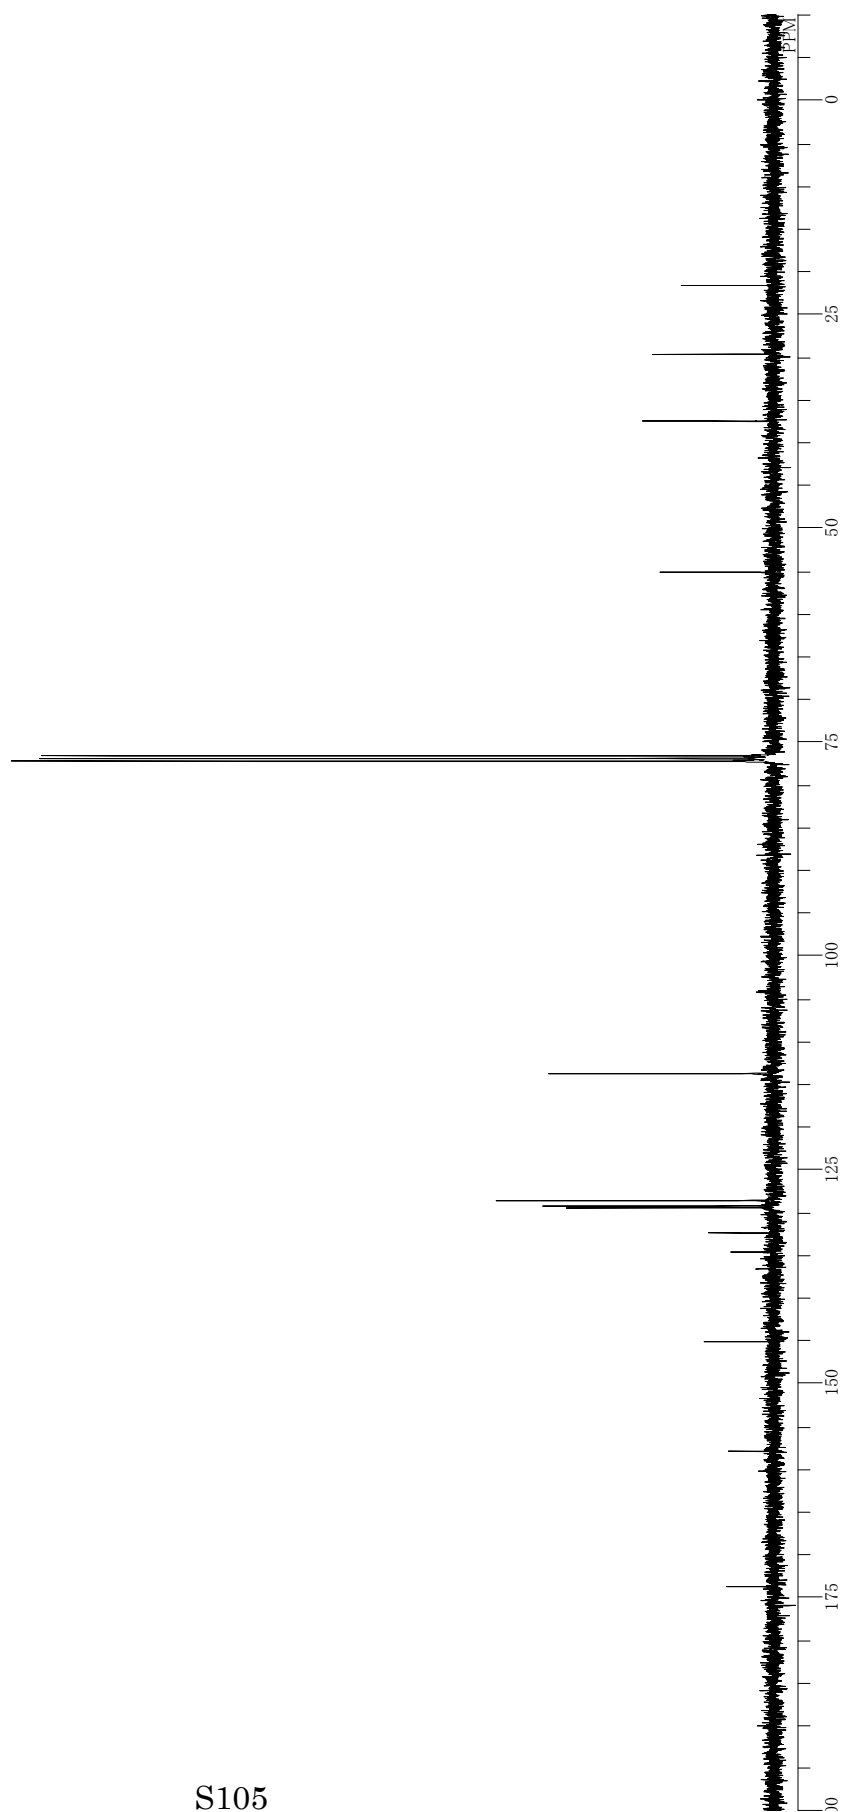

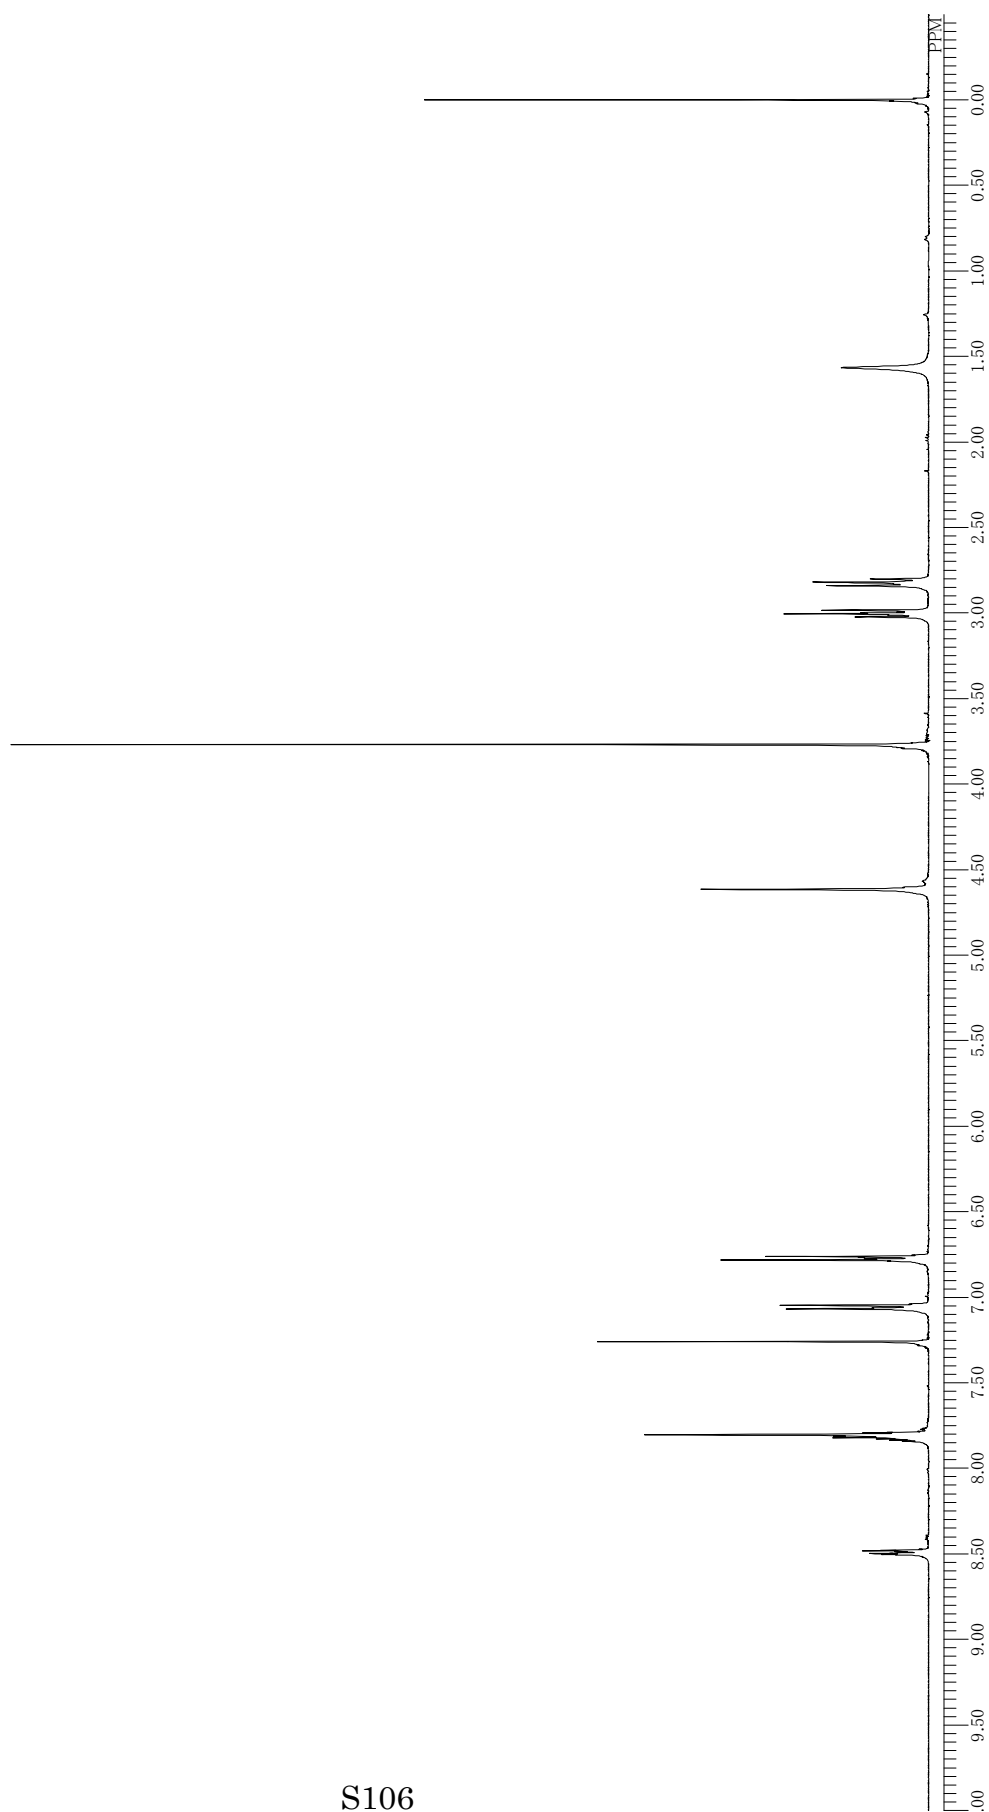

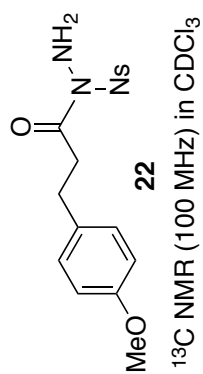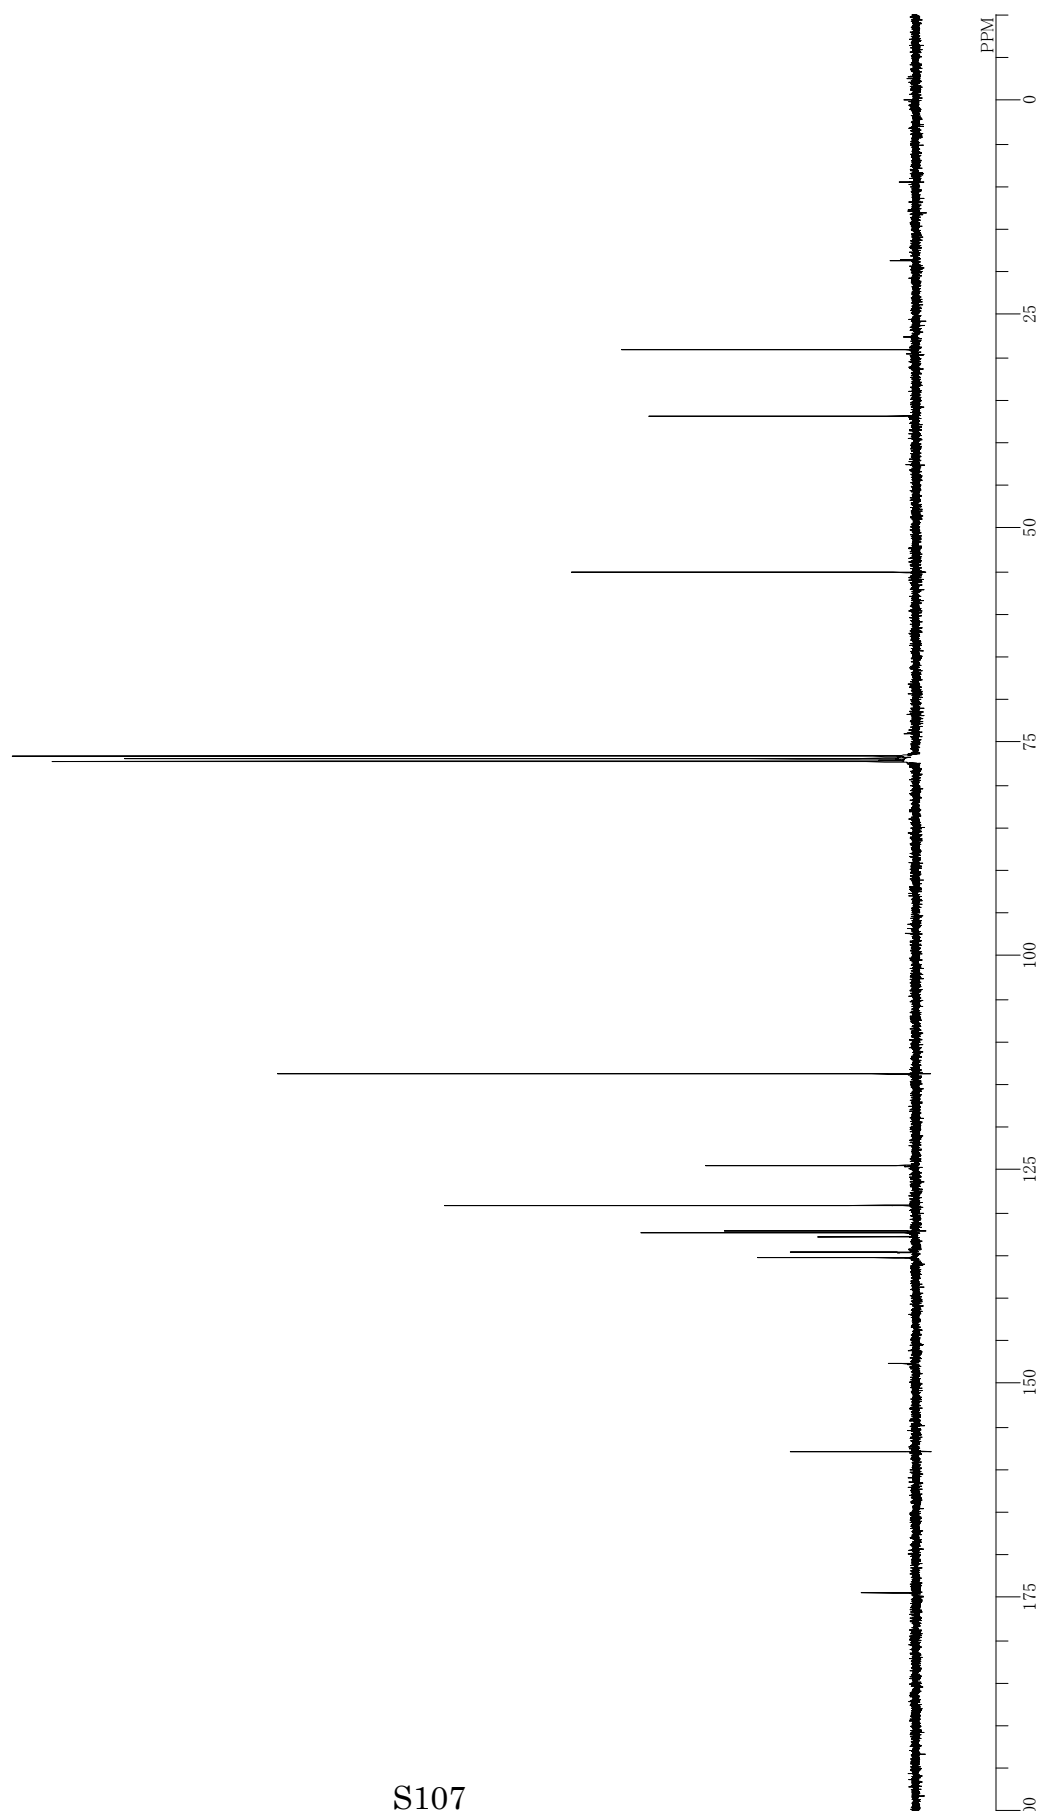

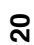 $^1\text{H}$  NMR (400 MHz) in  $\text{CDCl}_3$ 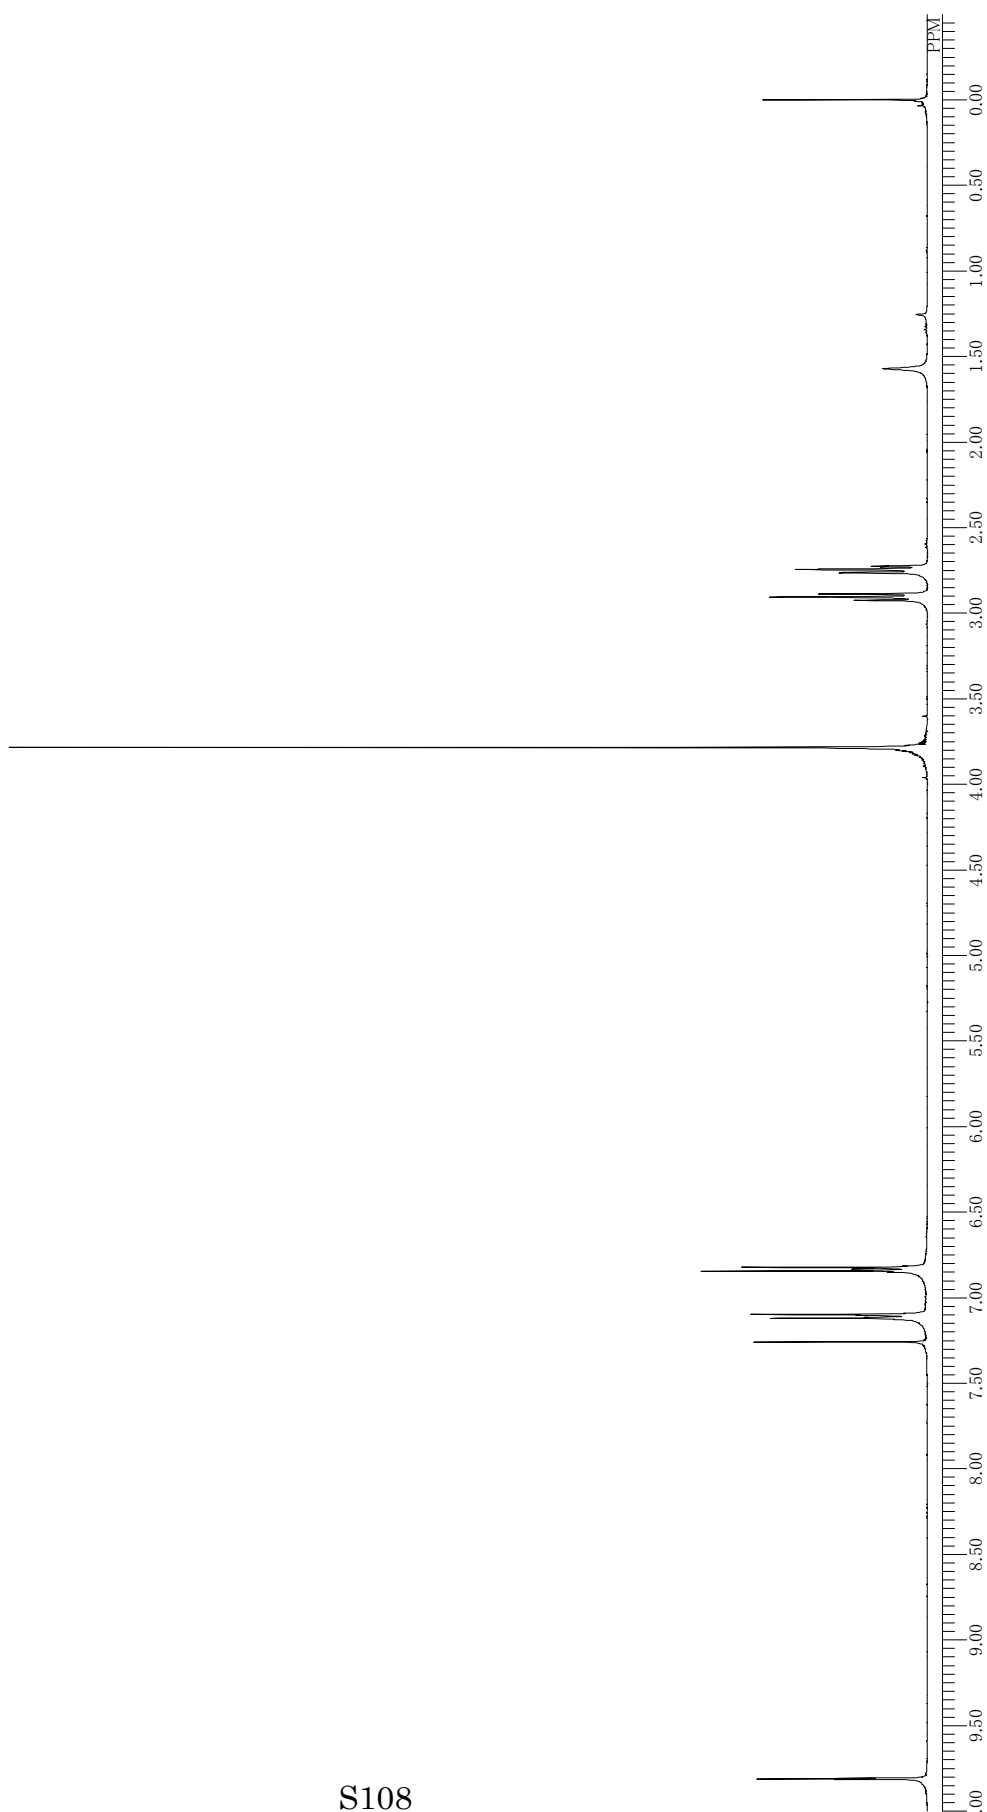



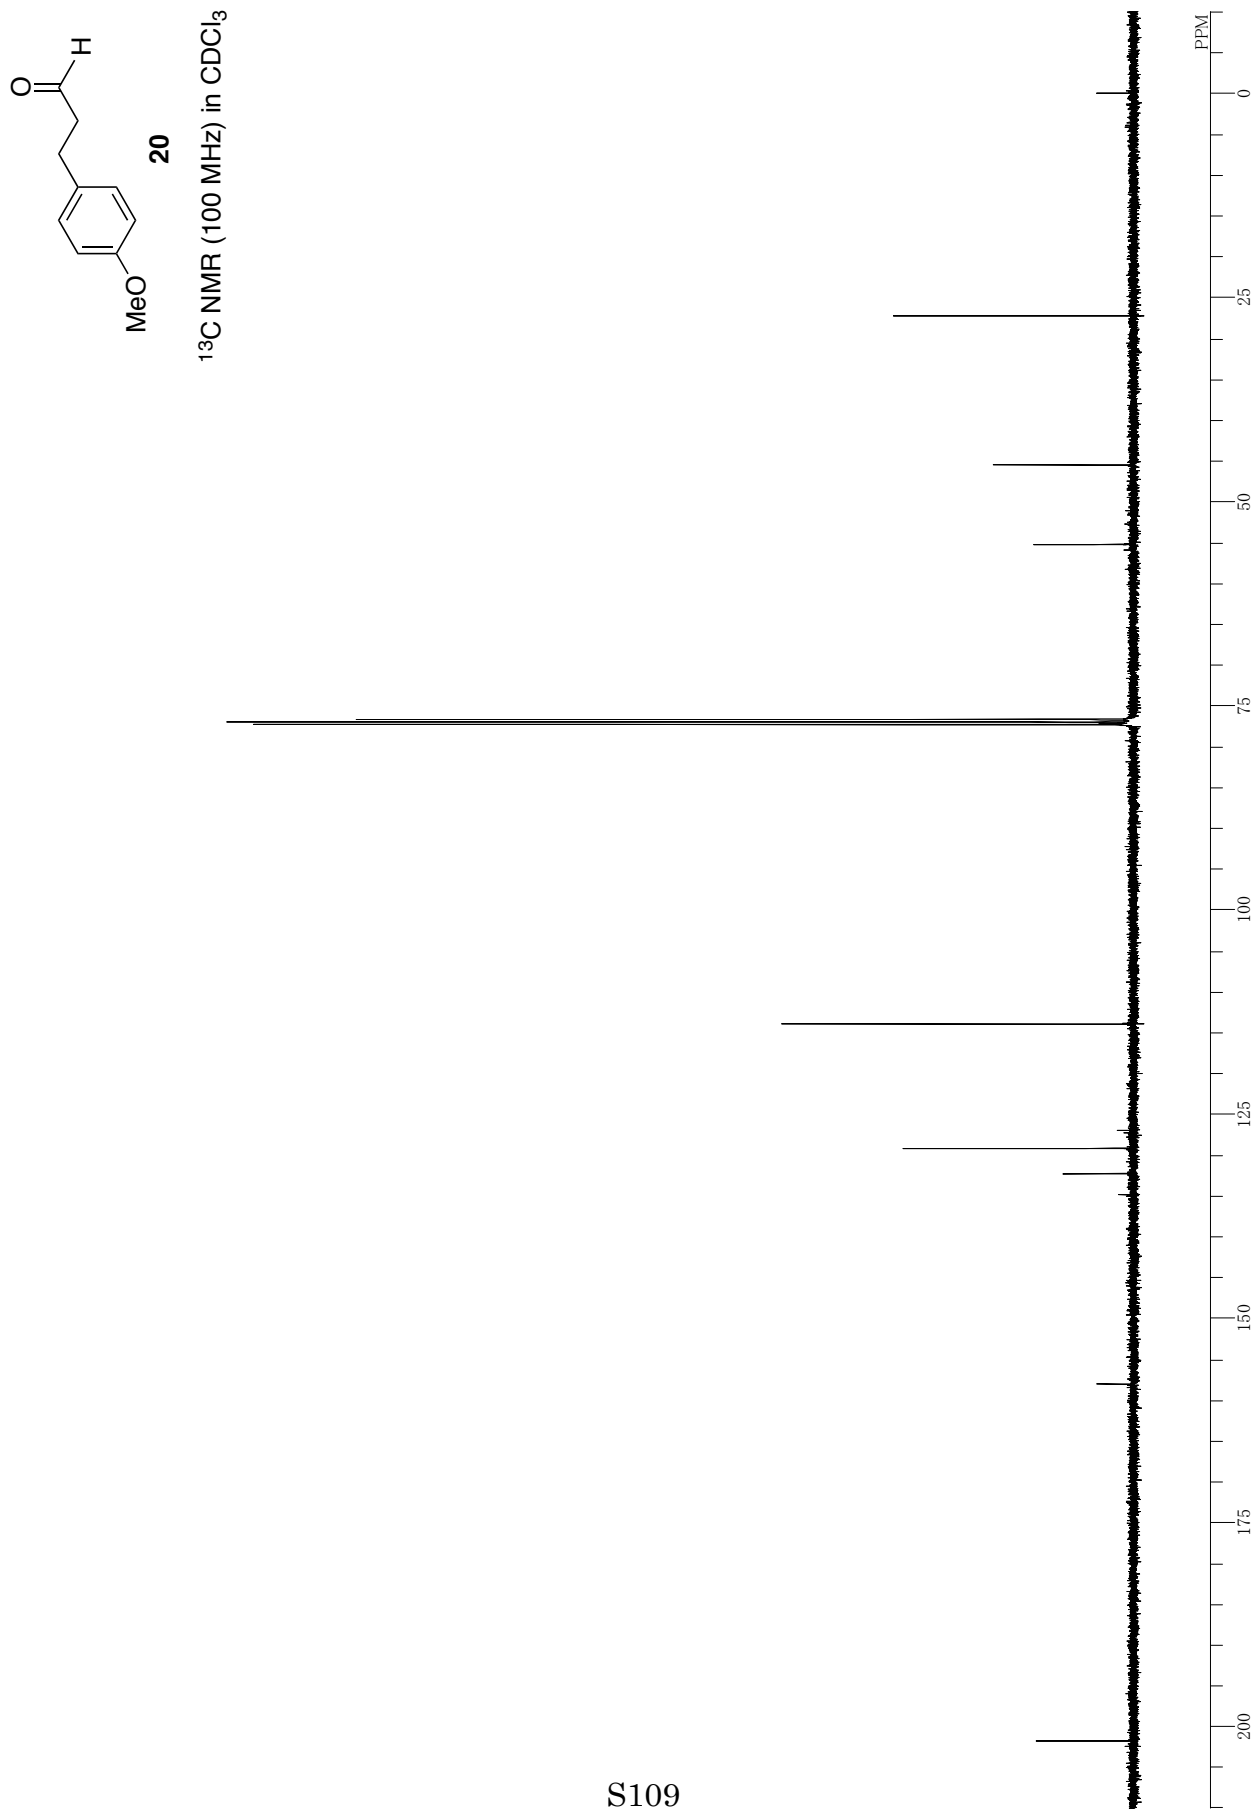

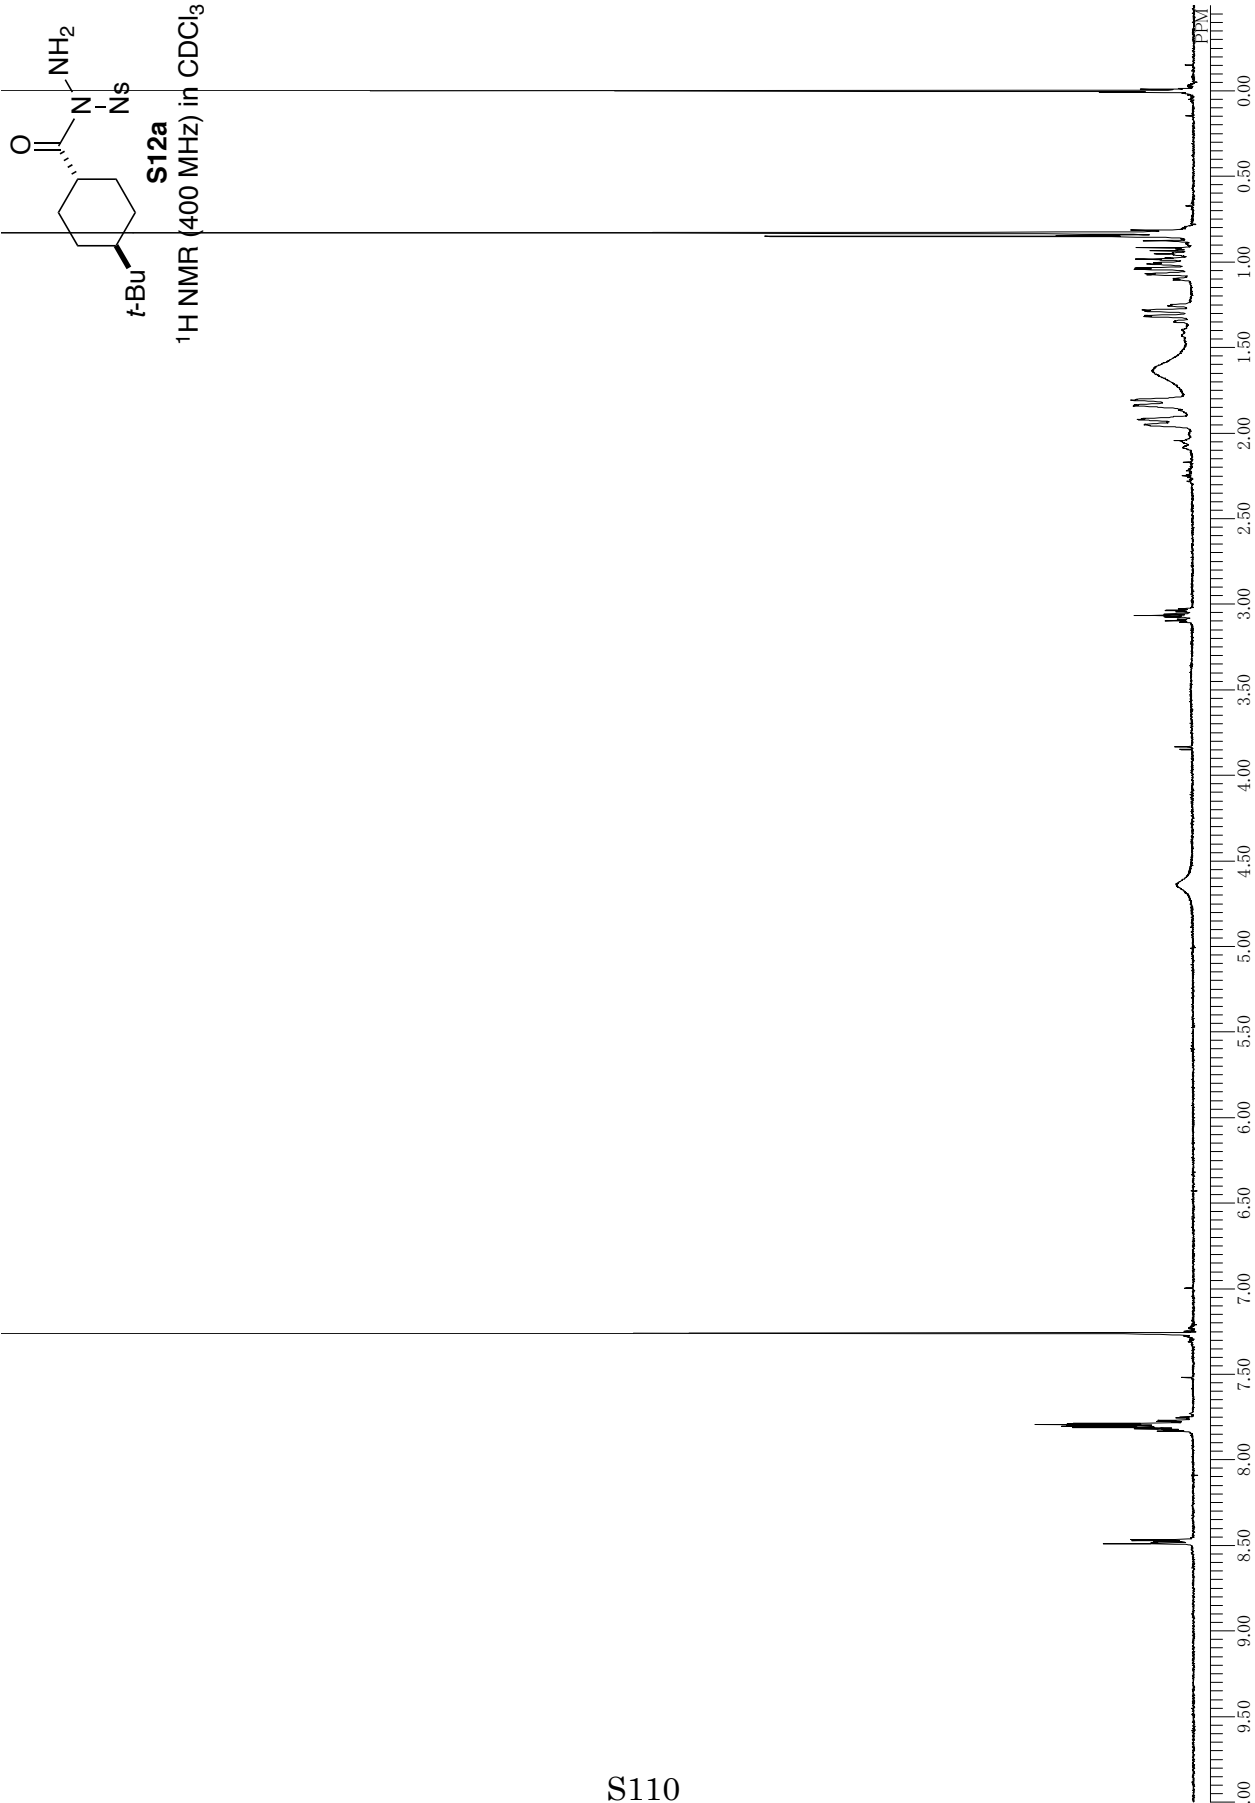

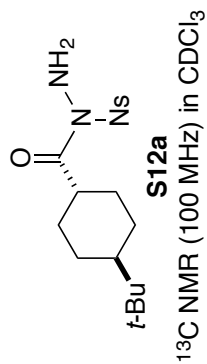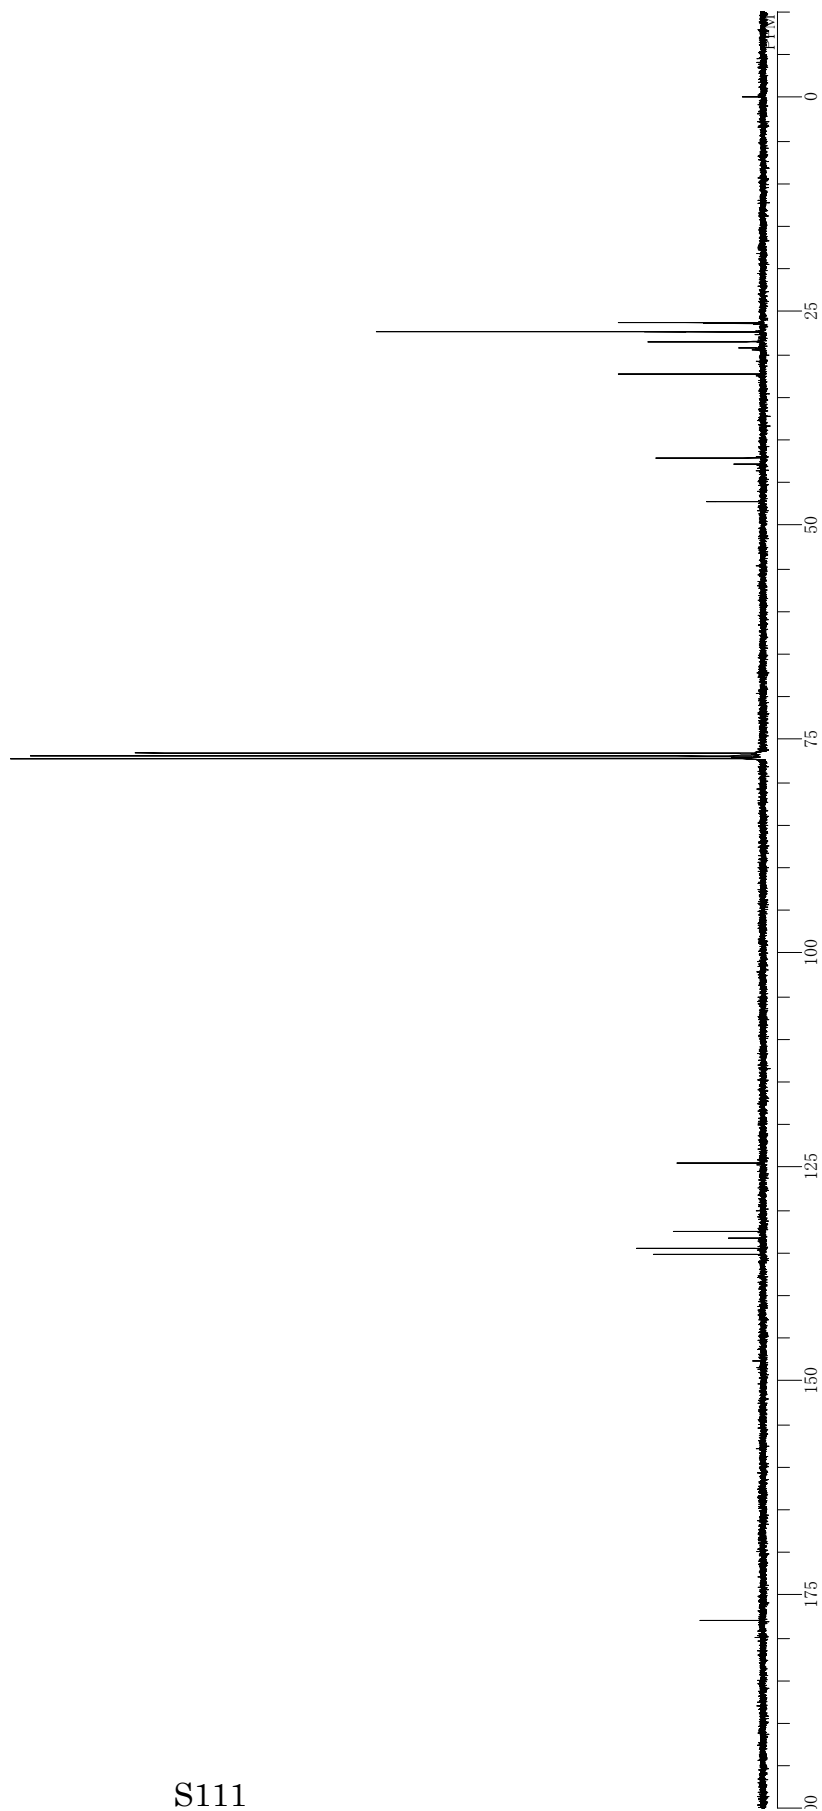

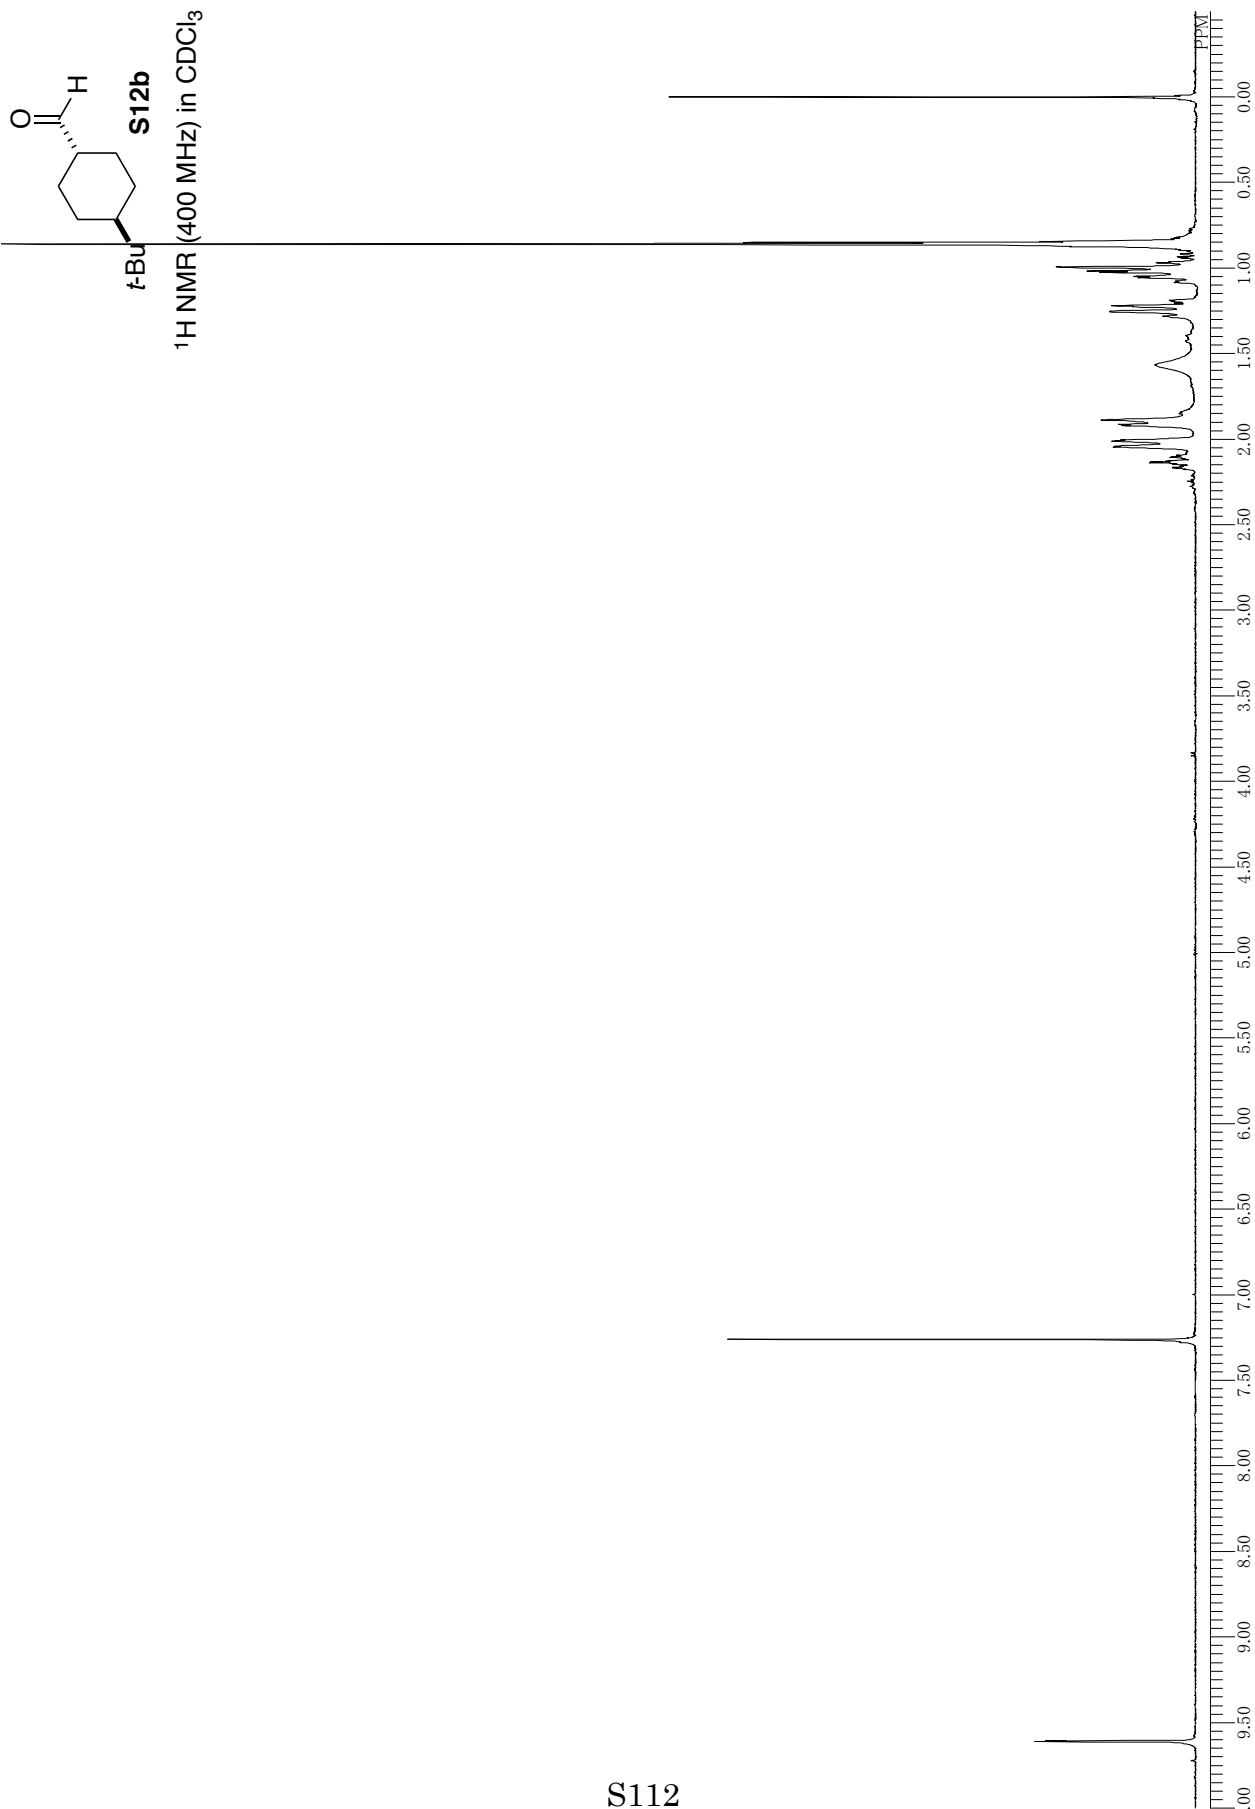

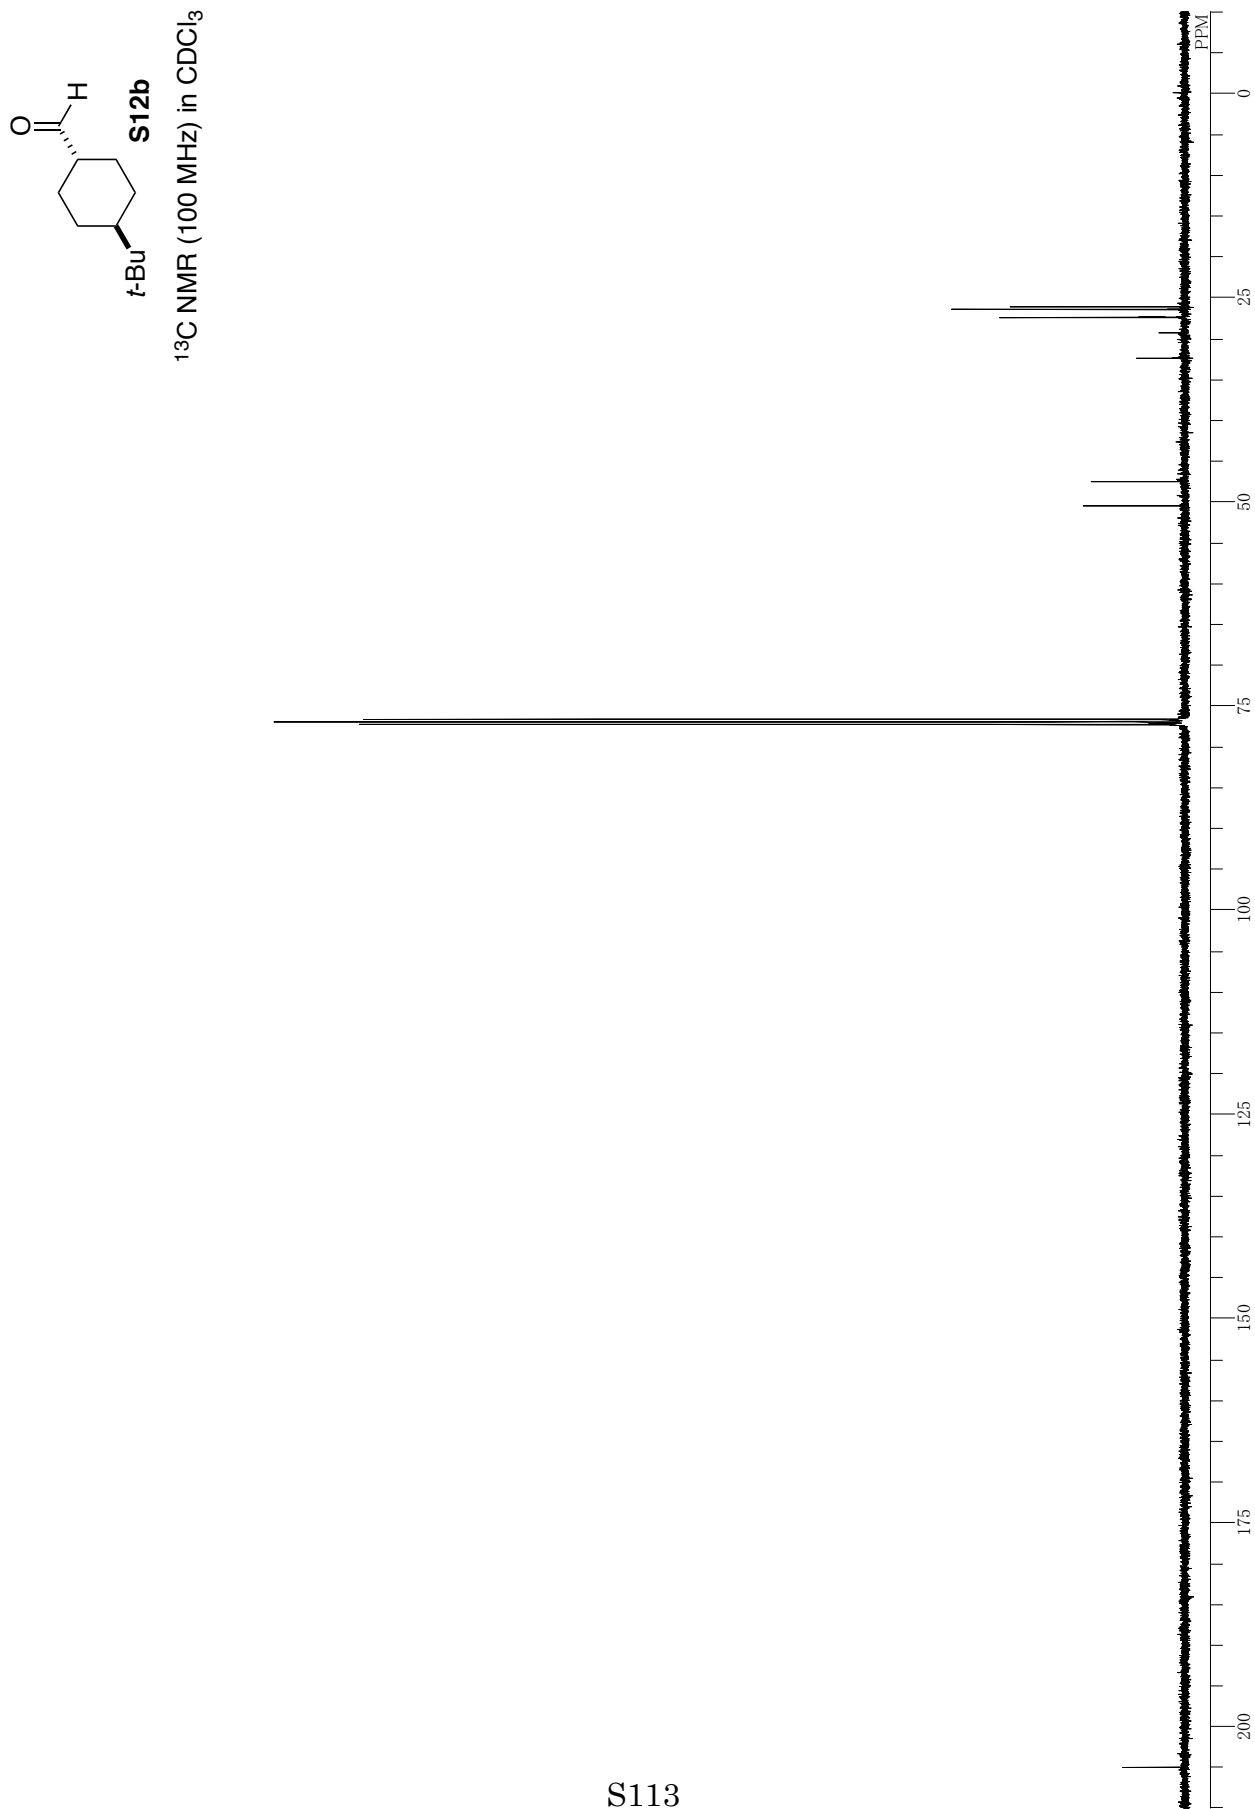

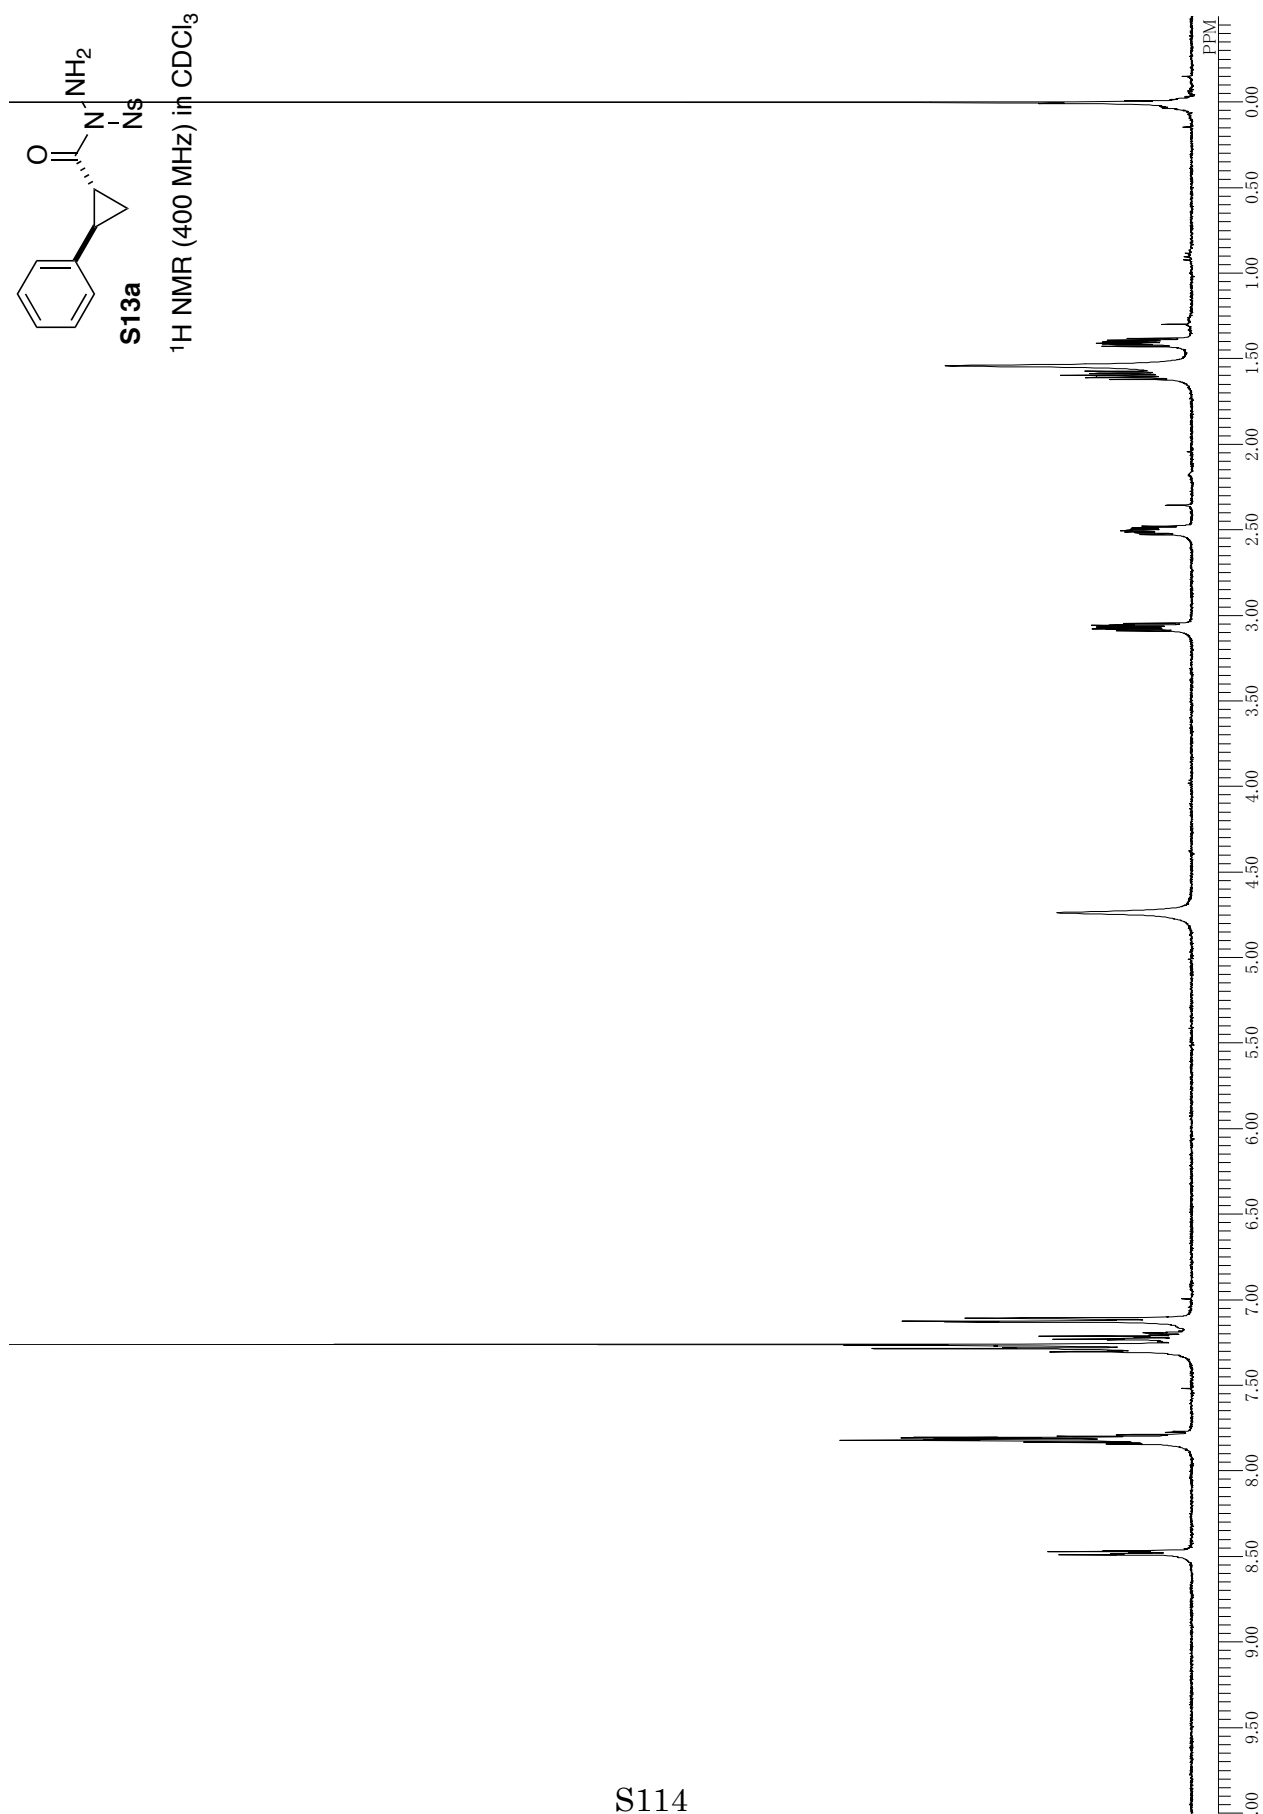

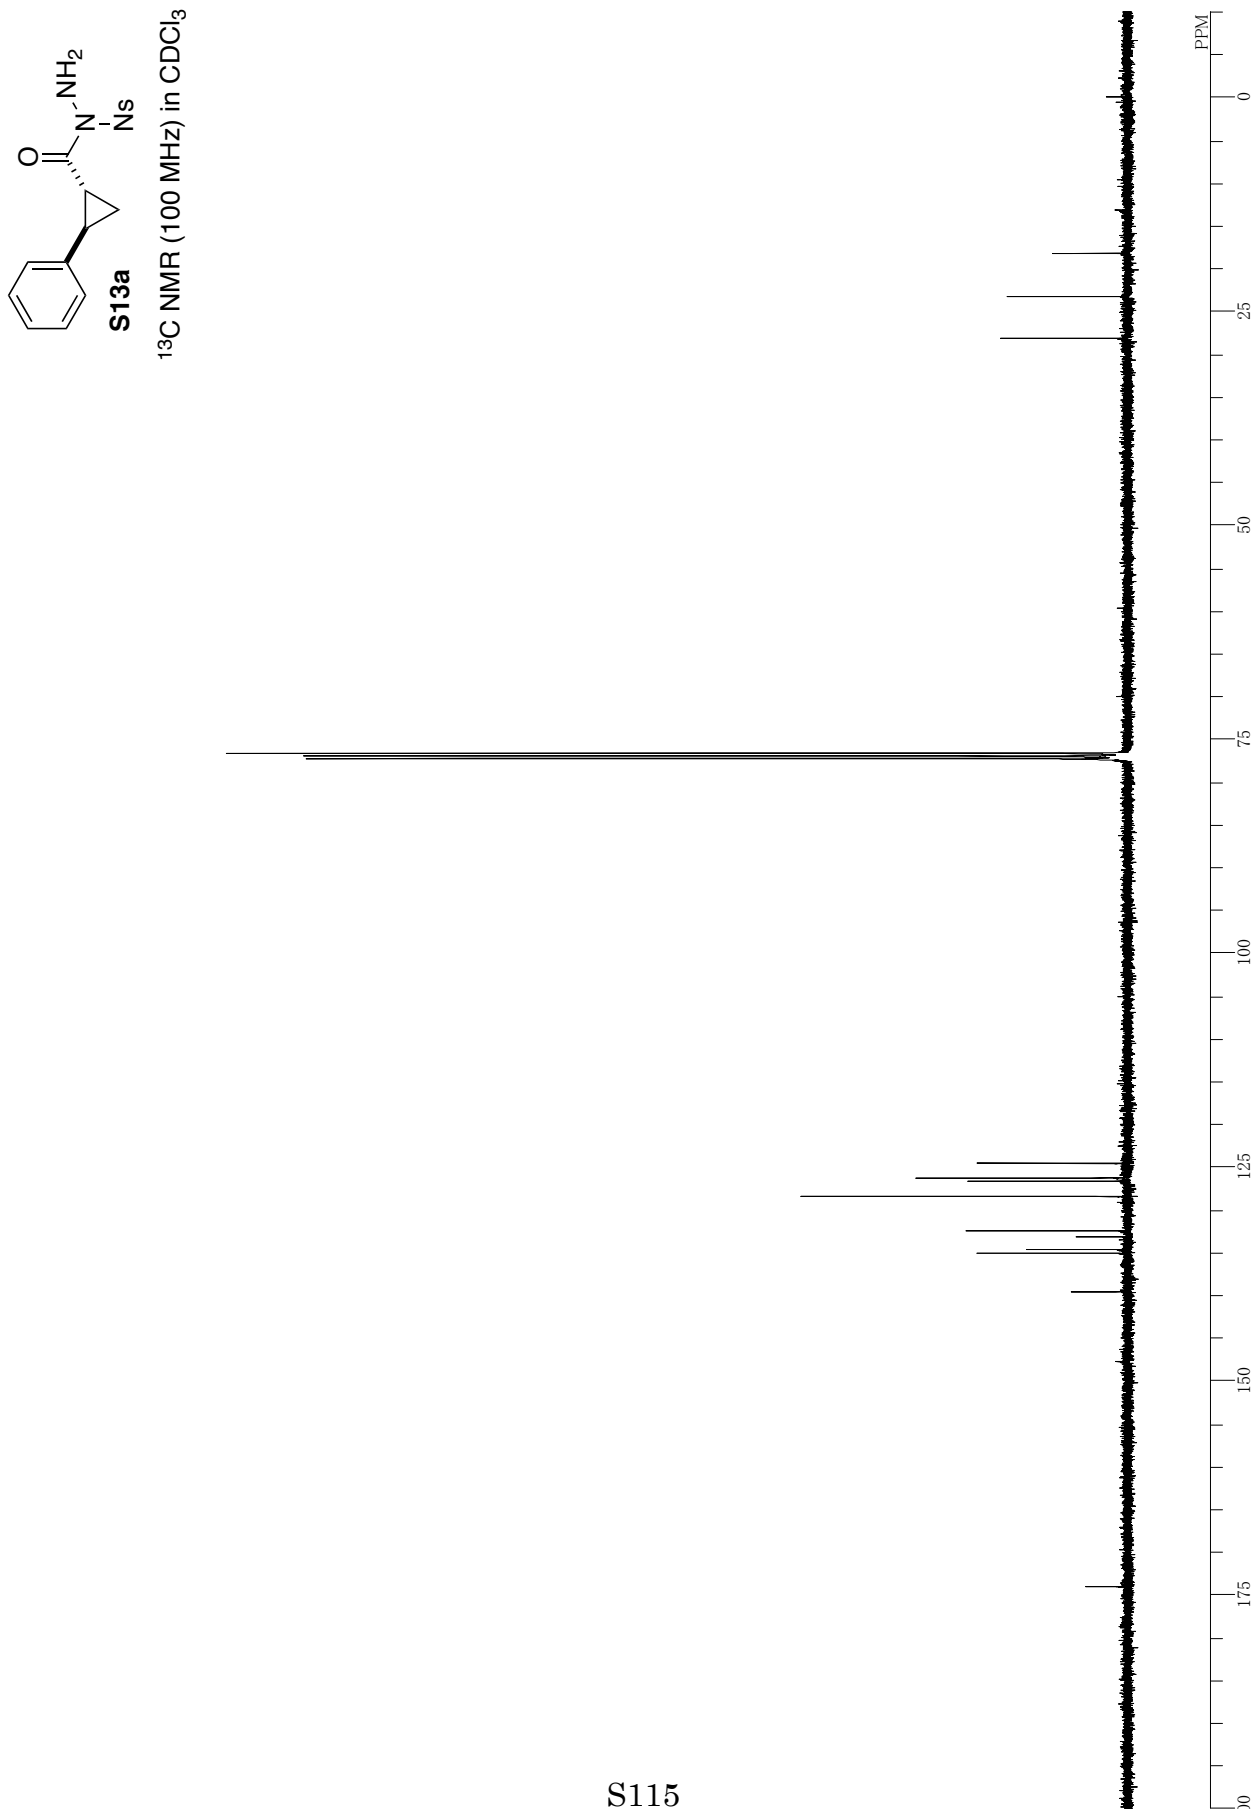

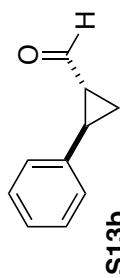

$^1\text{H}$  NMR (400 MHz) in  $\text{CDCl}_3$

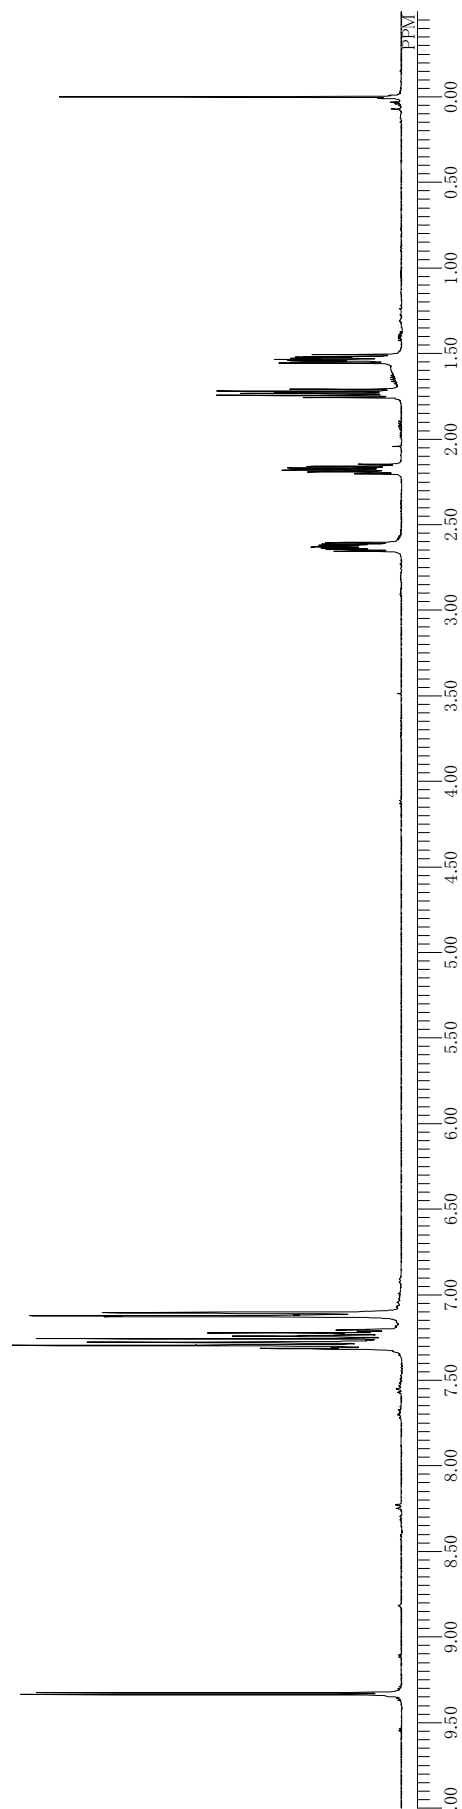



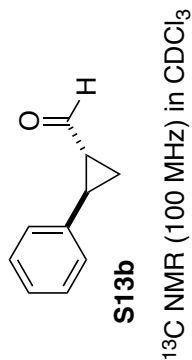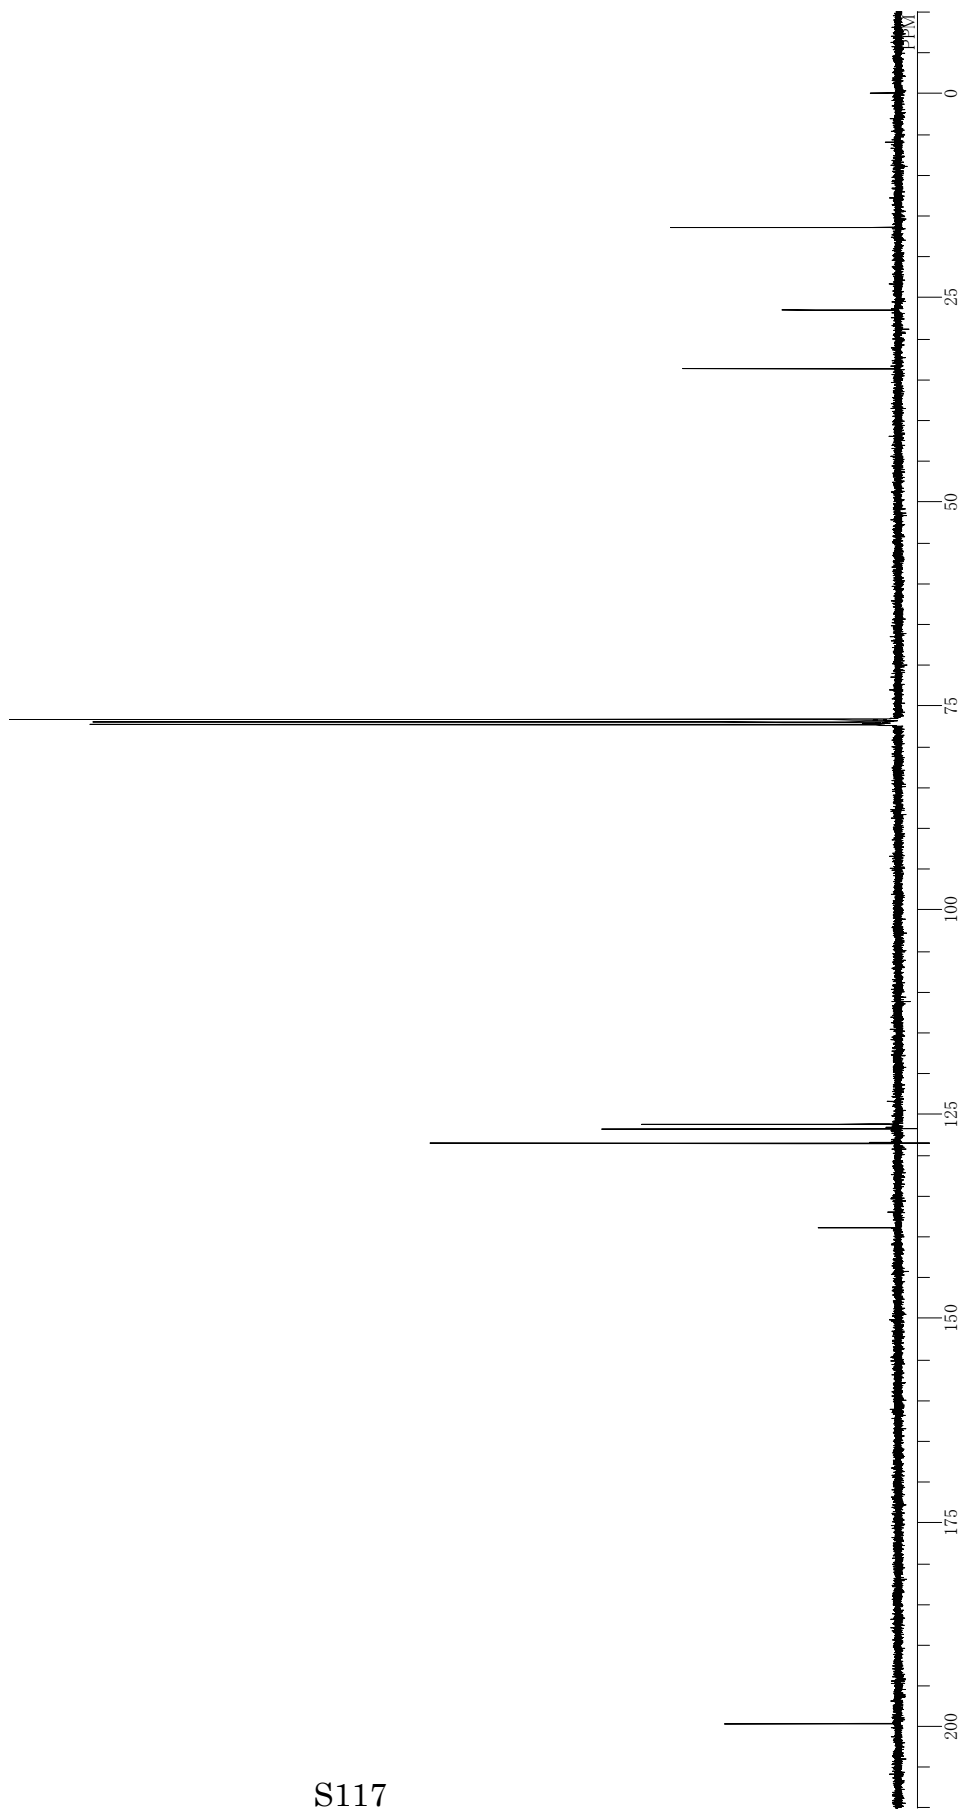

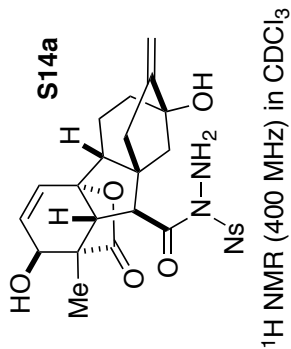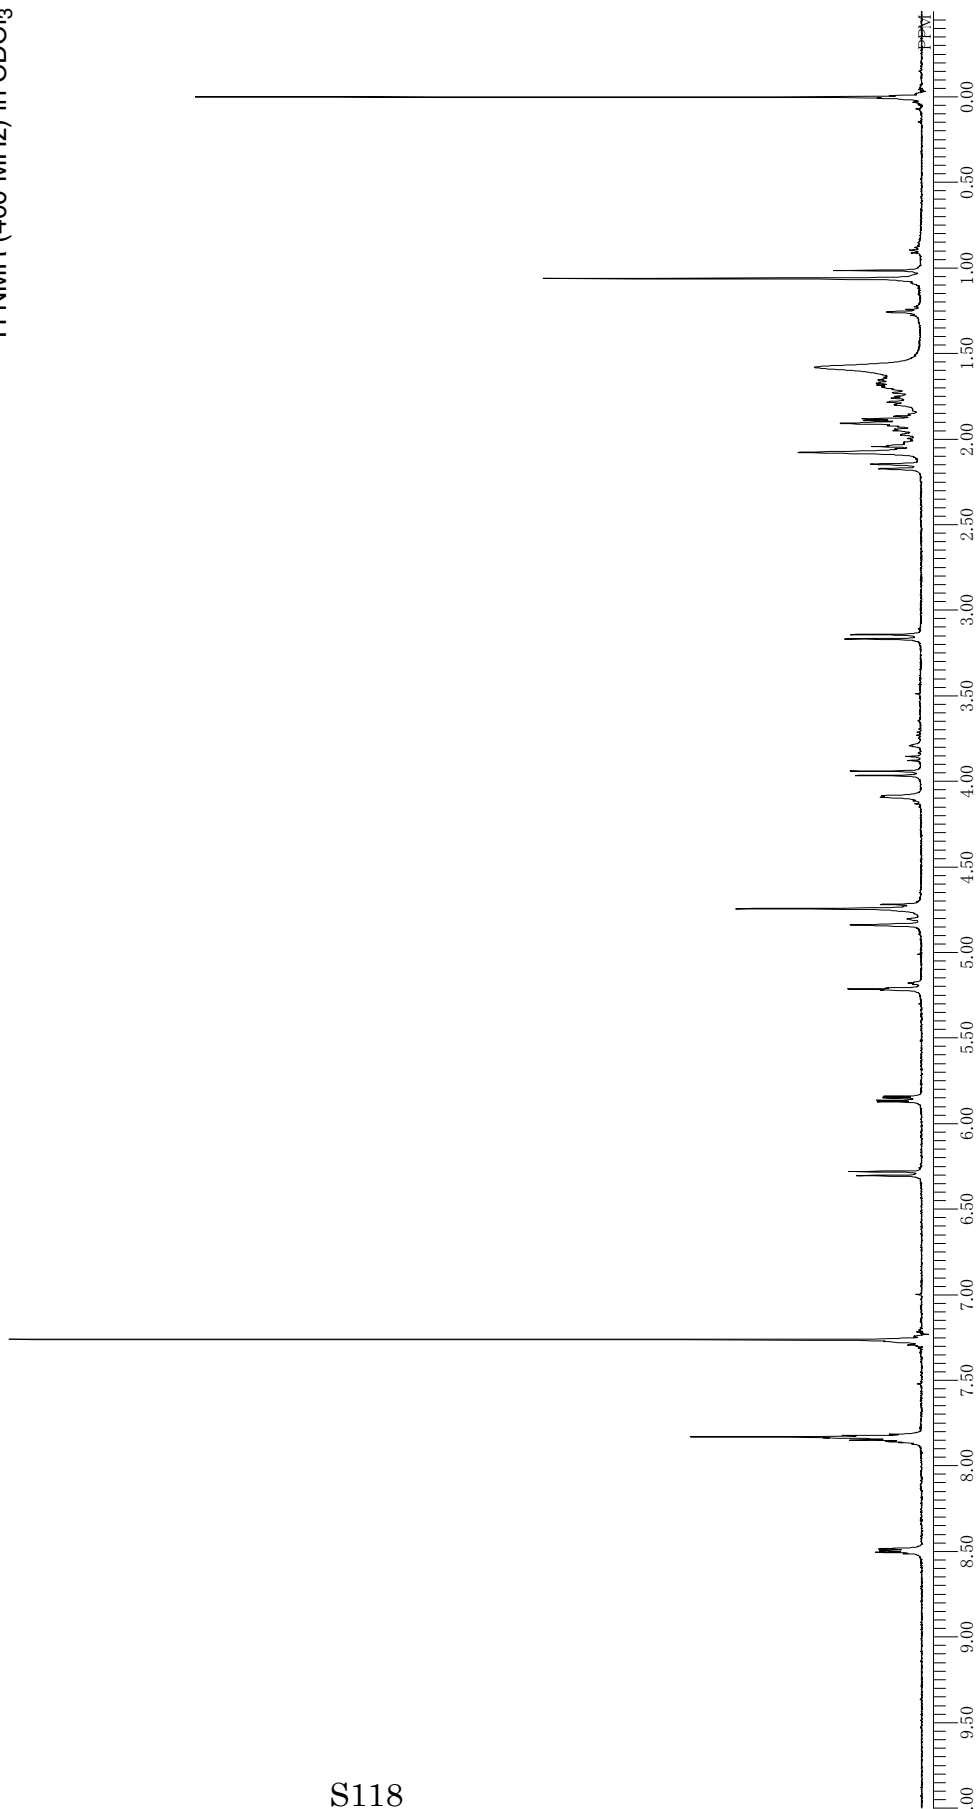

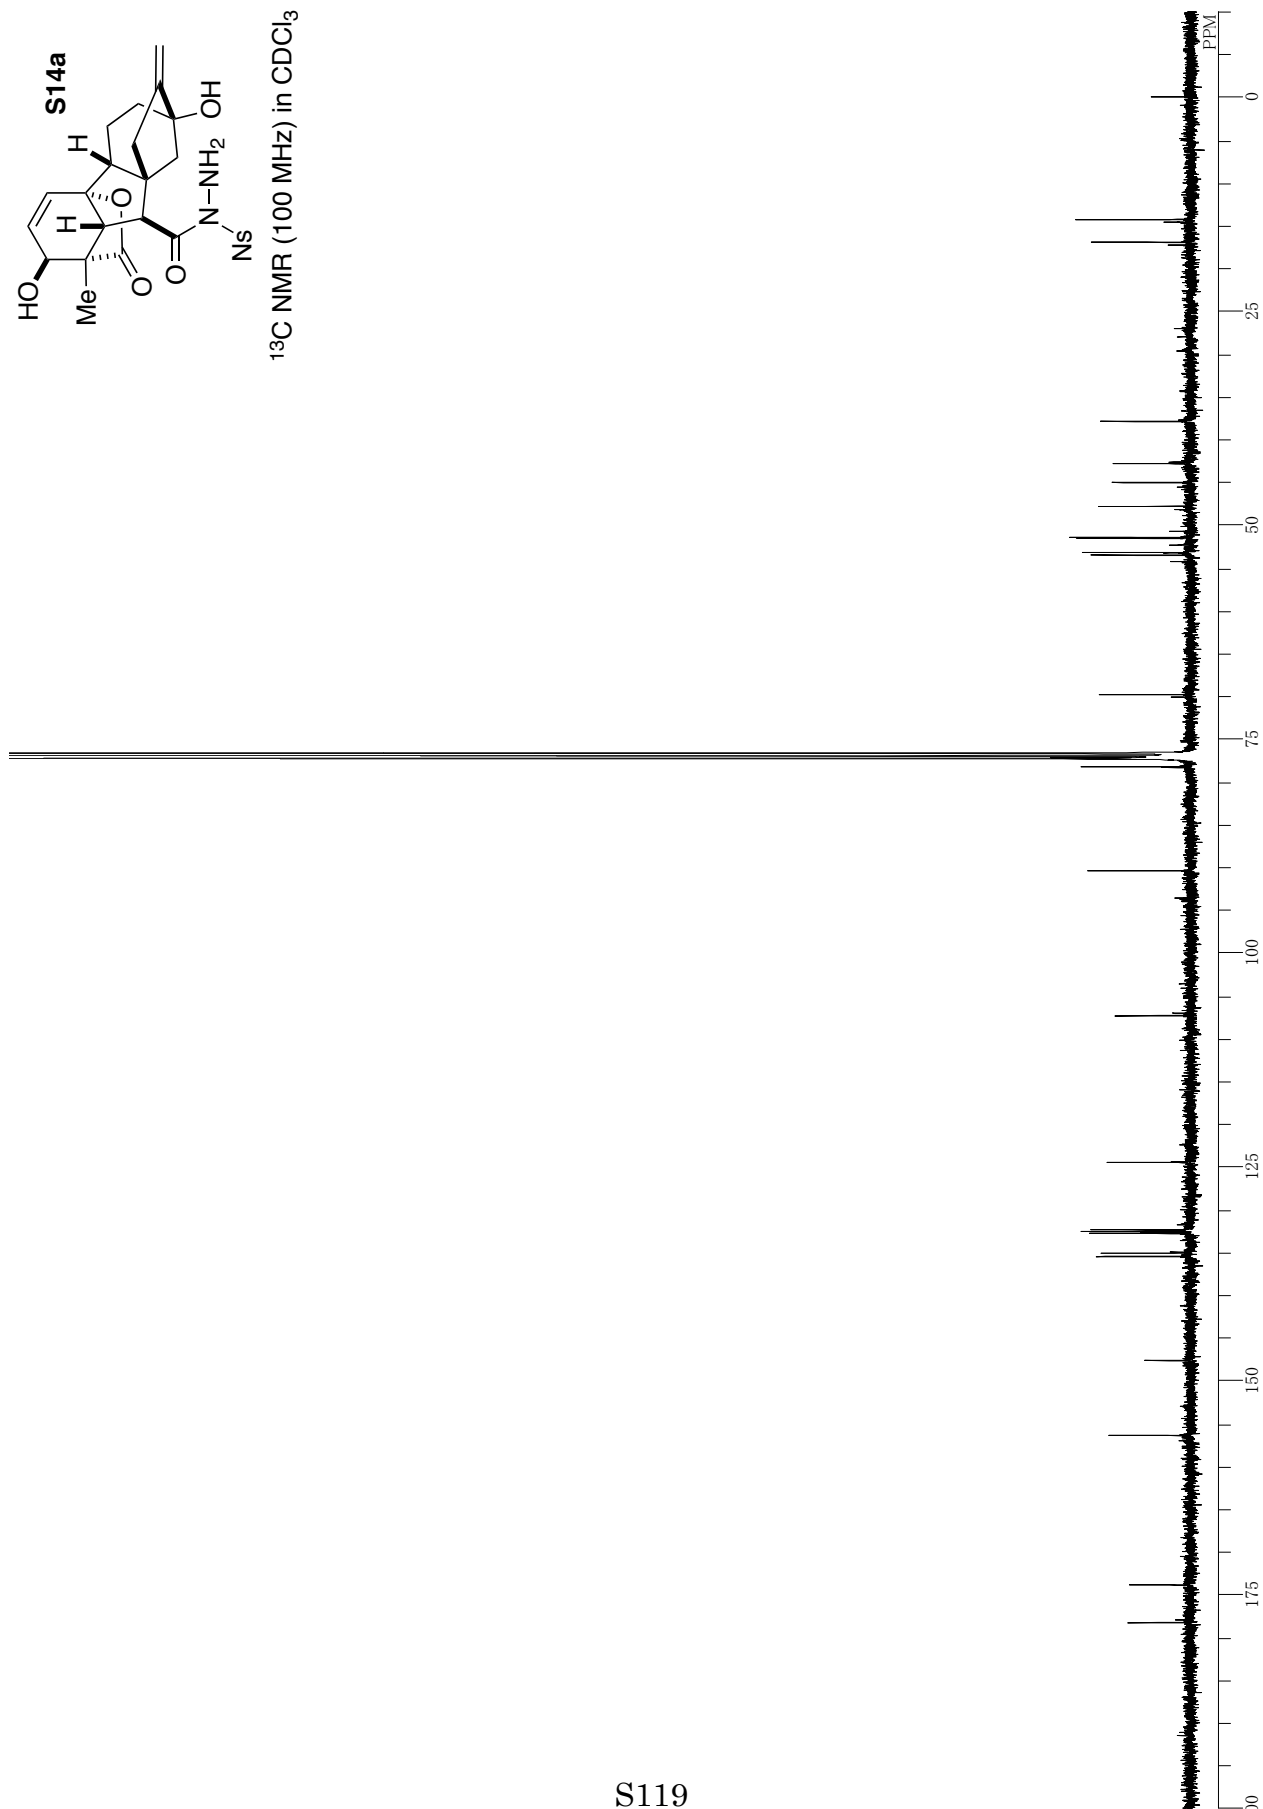

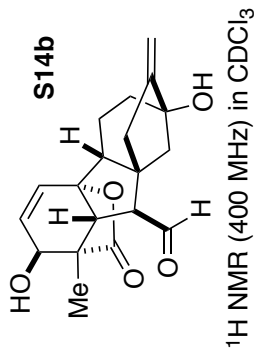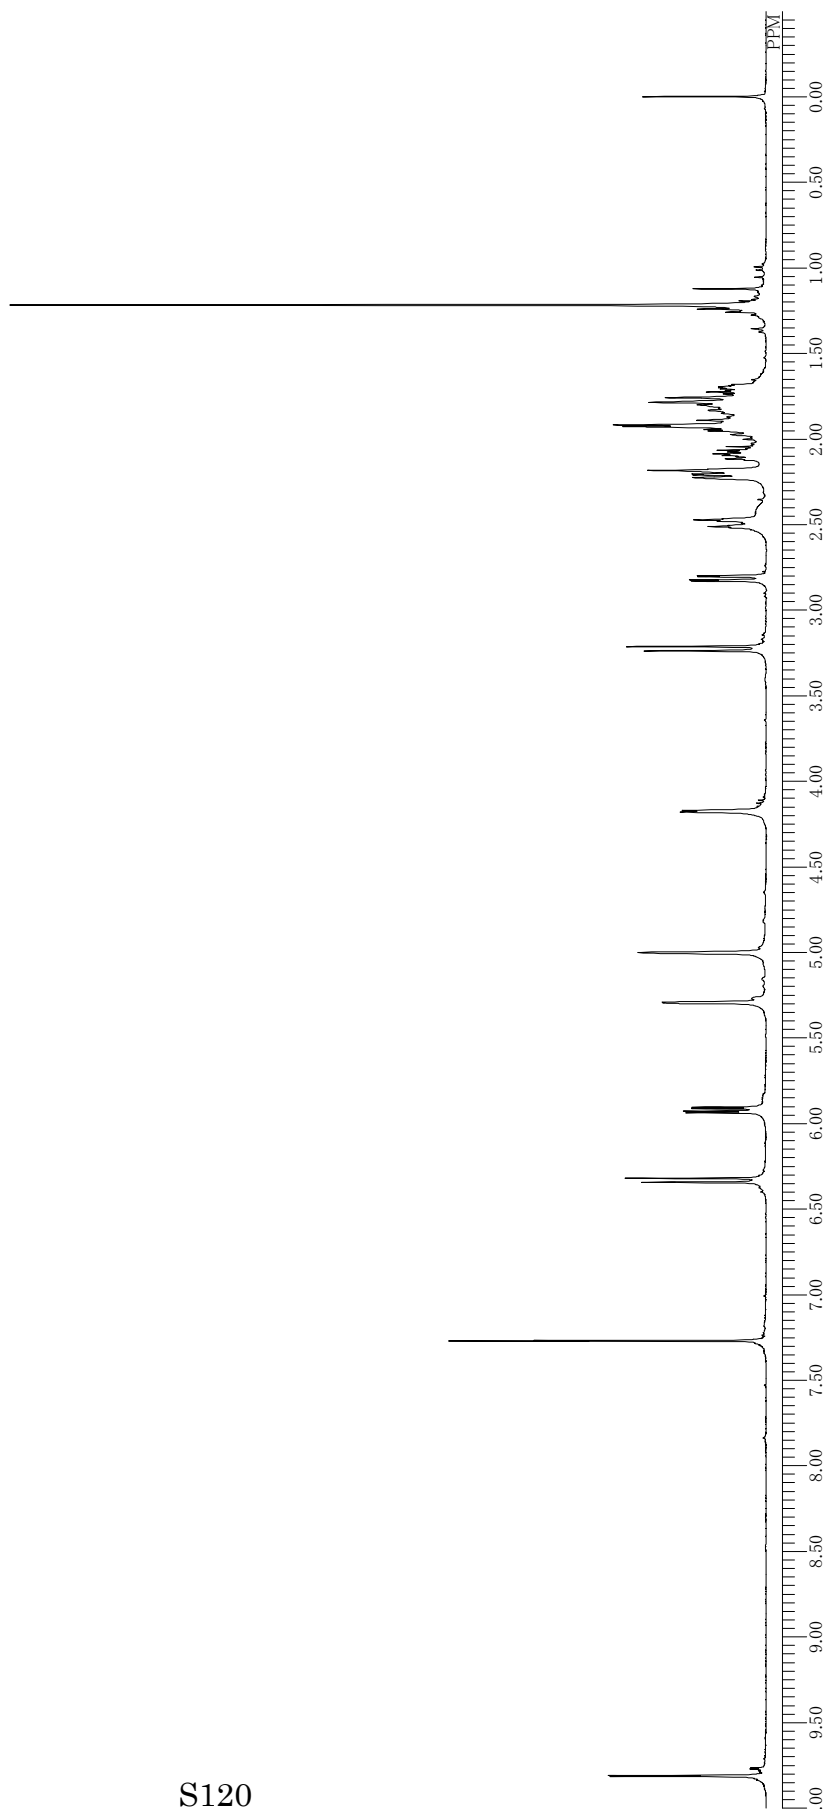

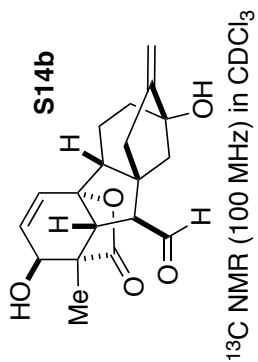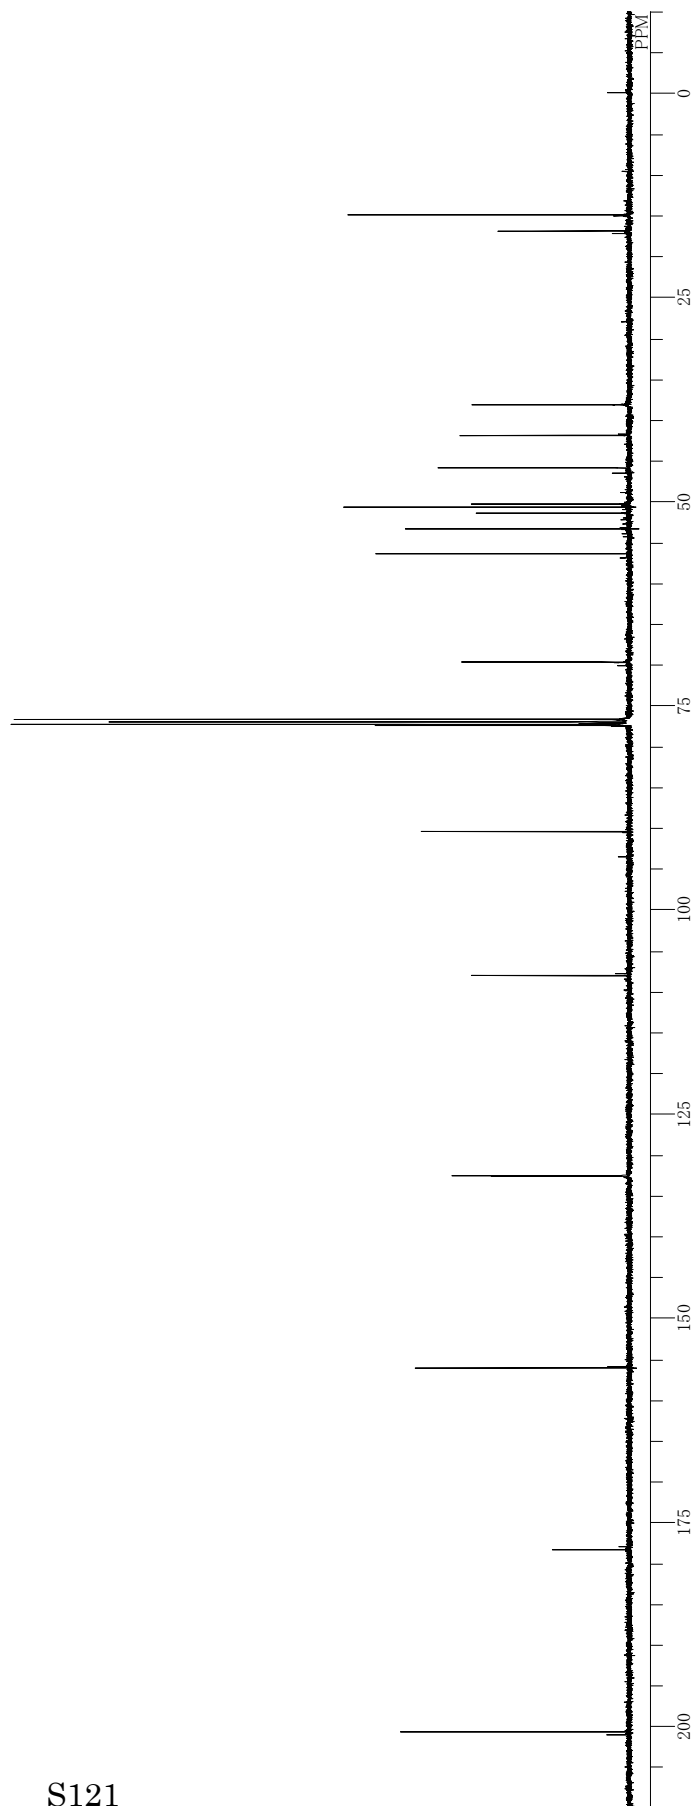

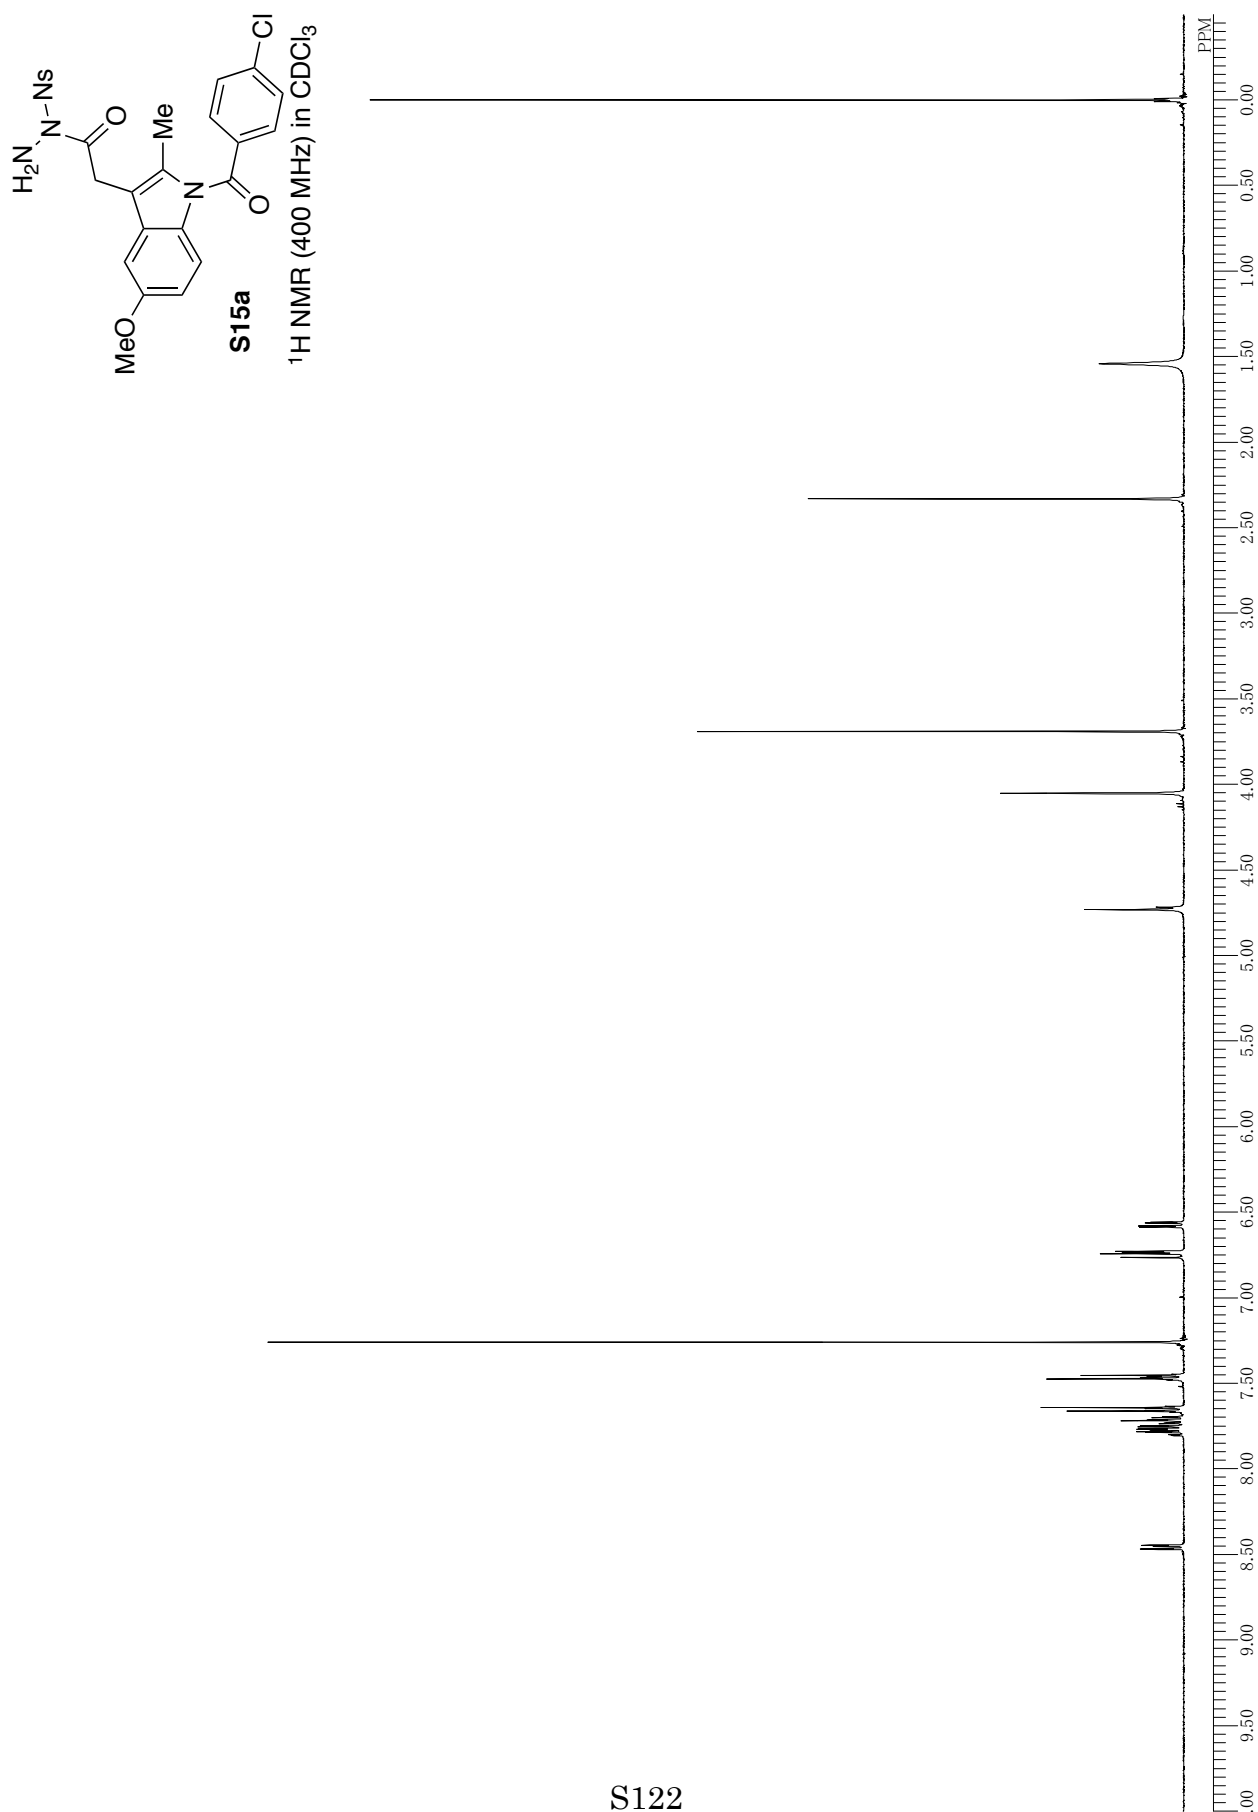

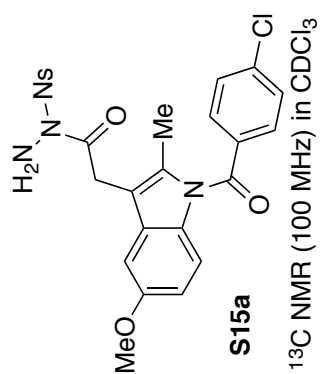

S123

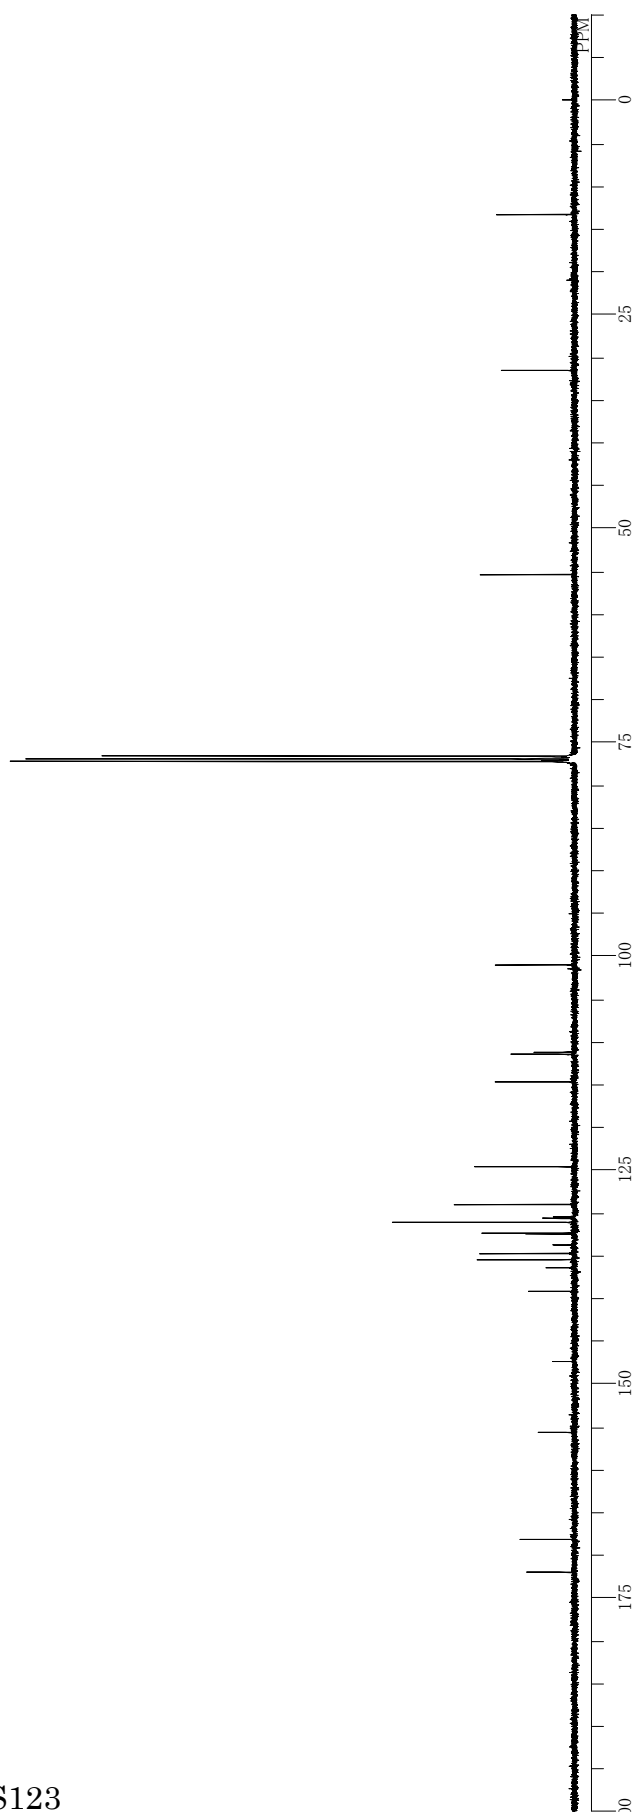

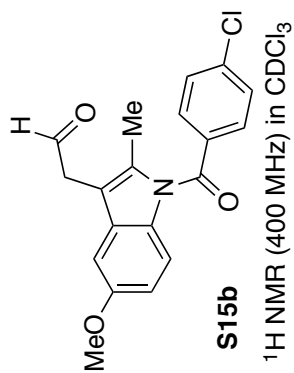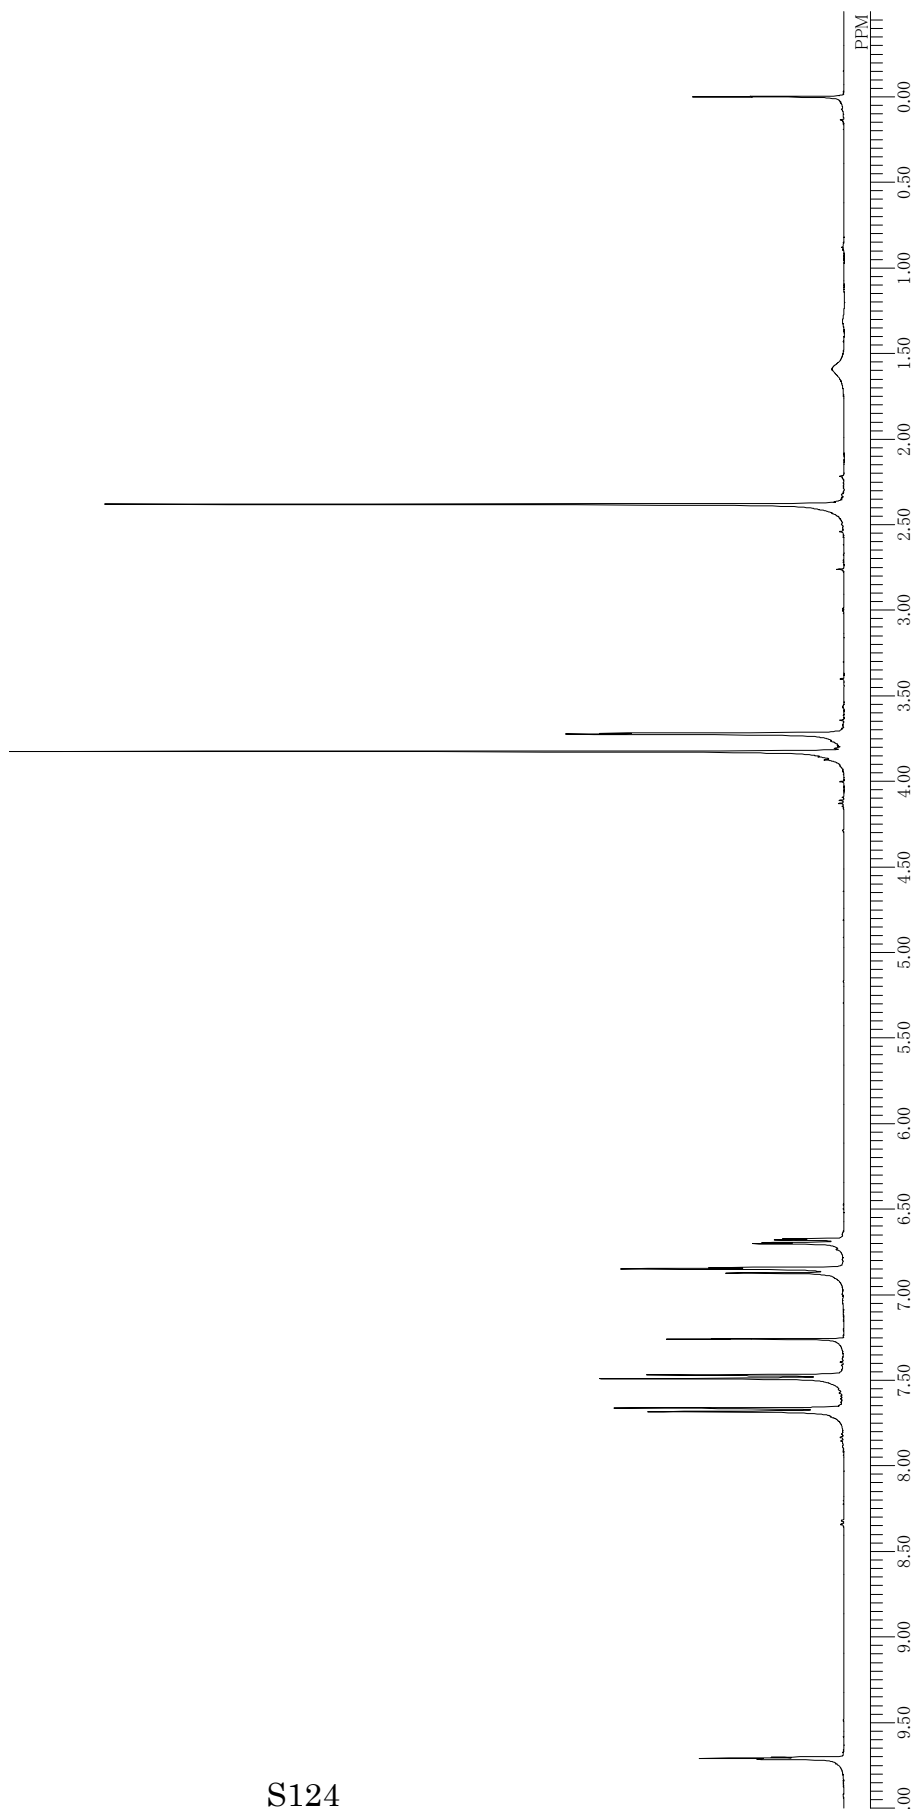



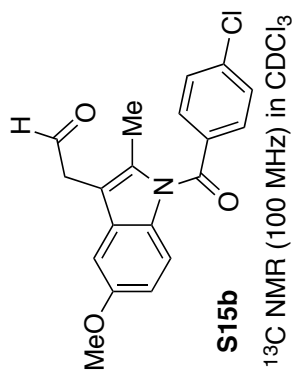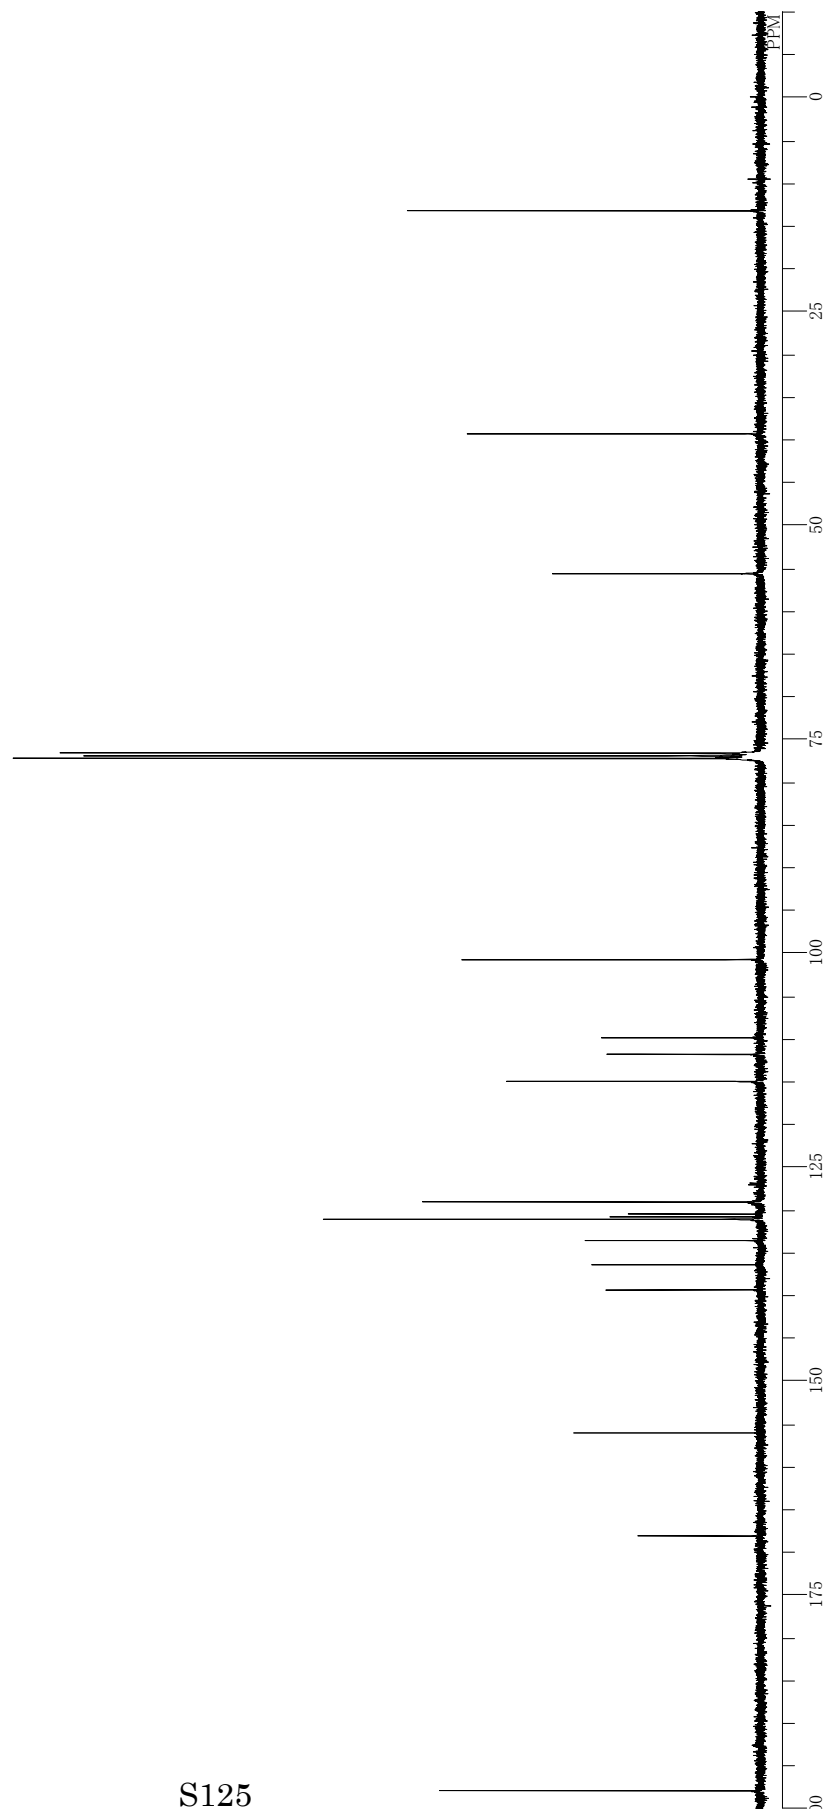

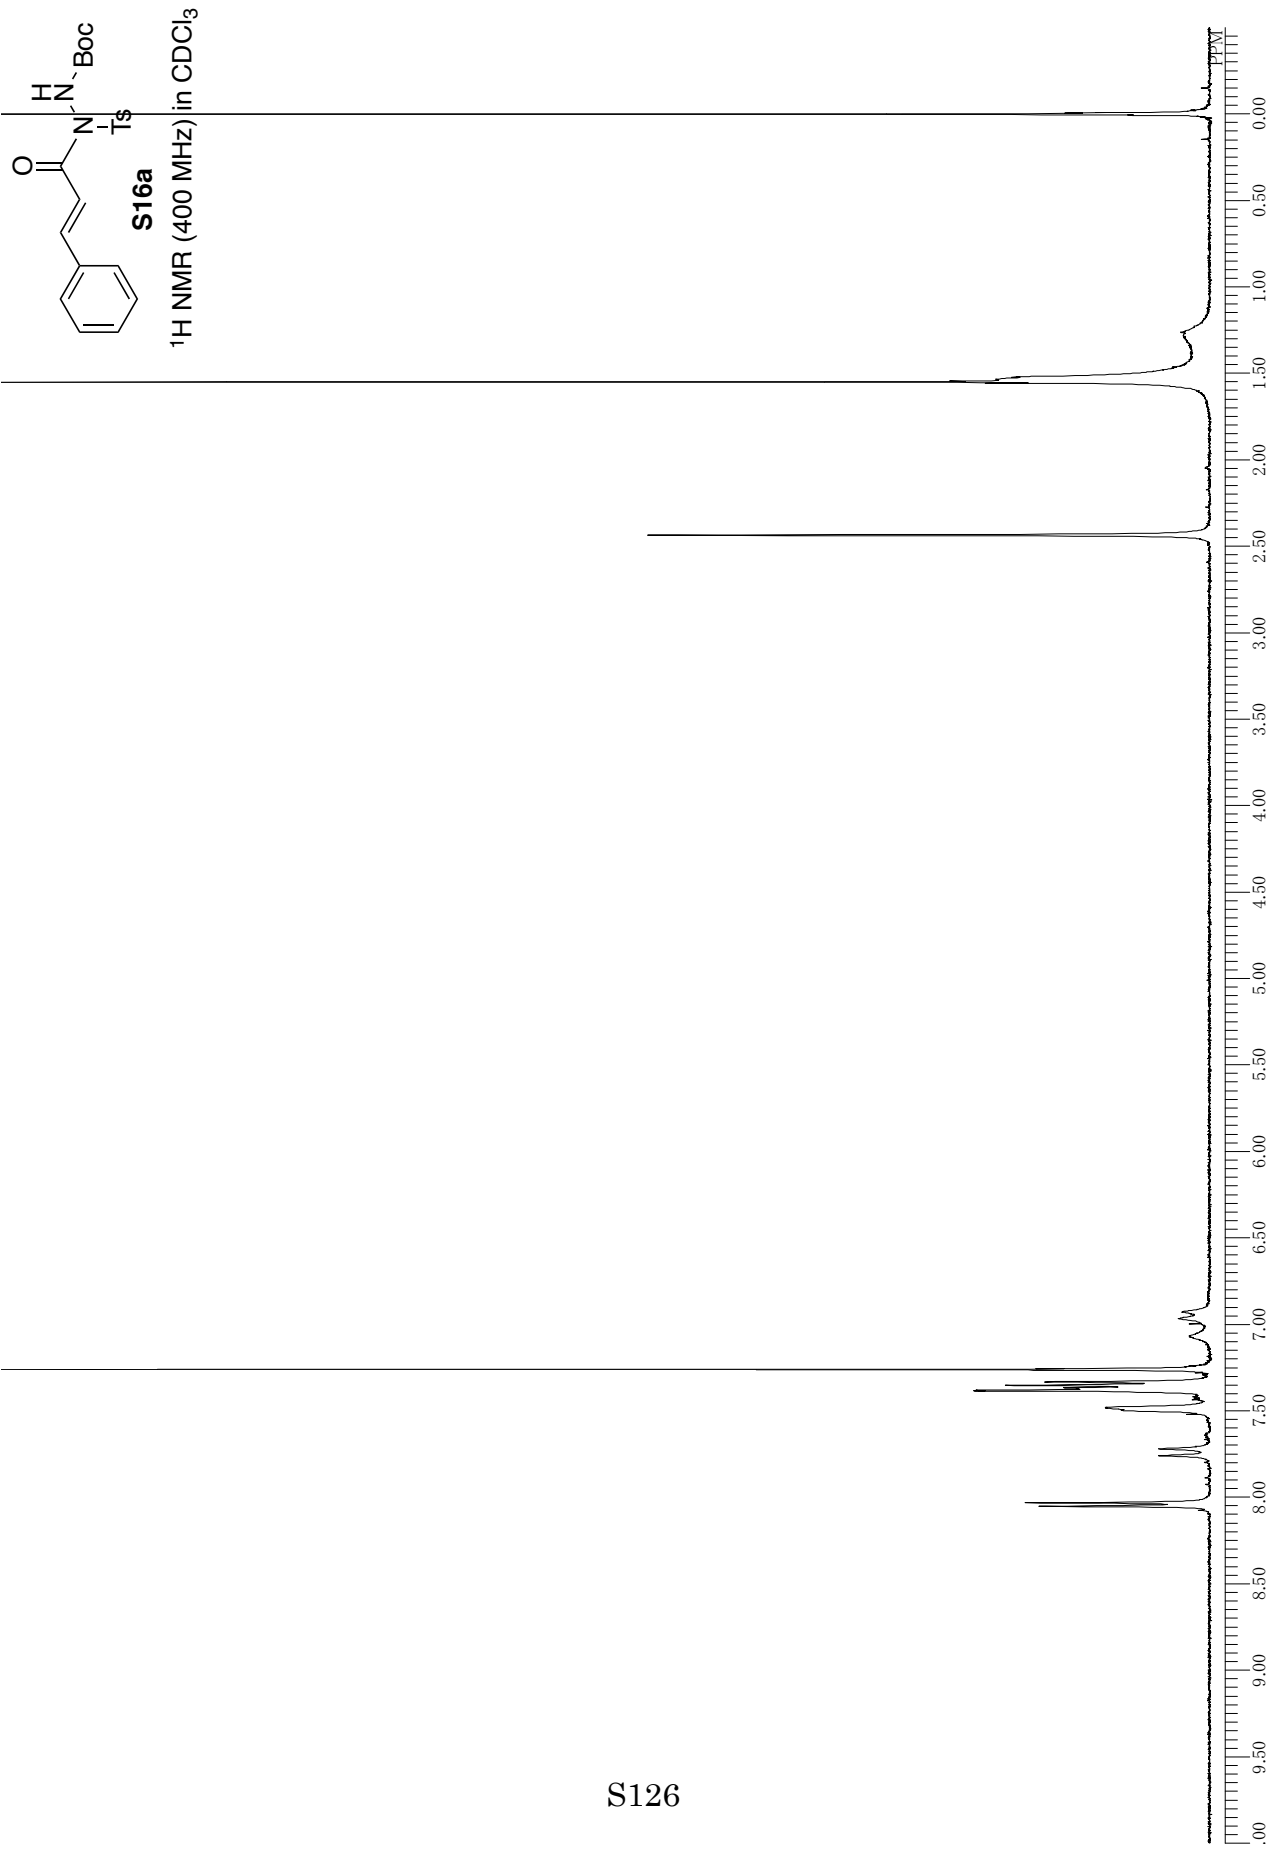

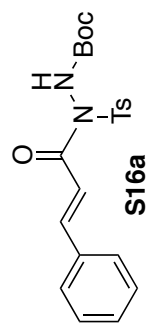

$^{13}\text{C}$  NMR (100 MHz) in  $\text{CDCl}_3$

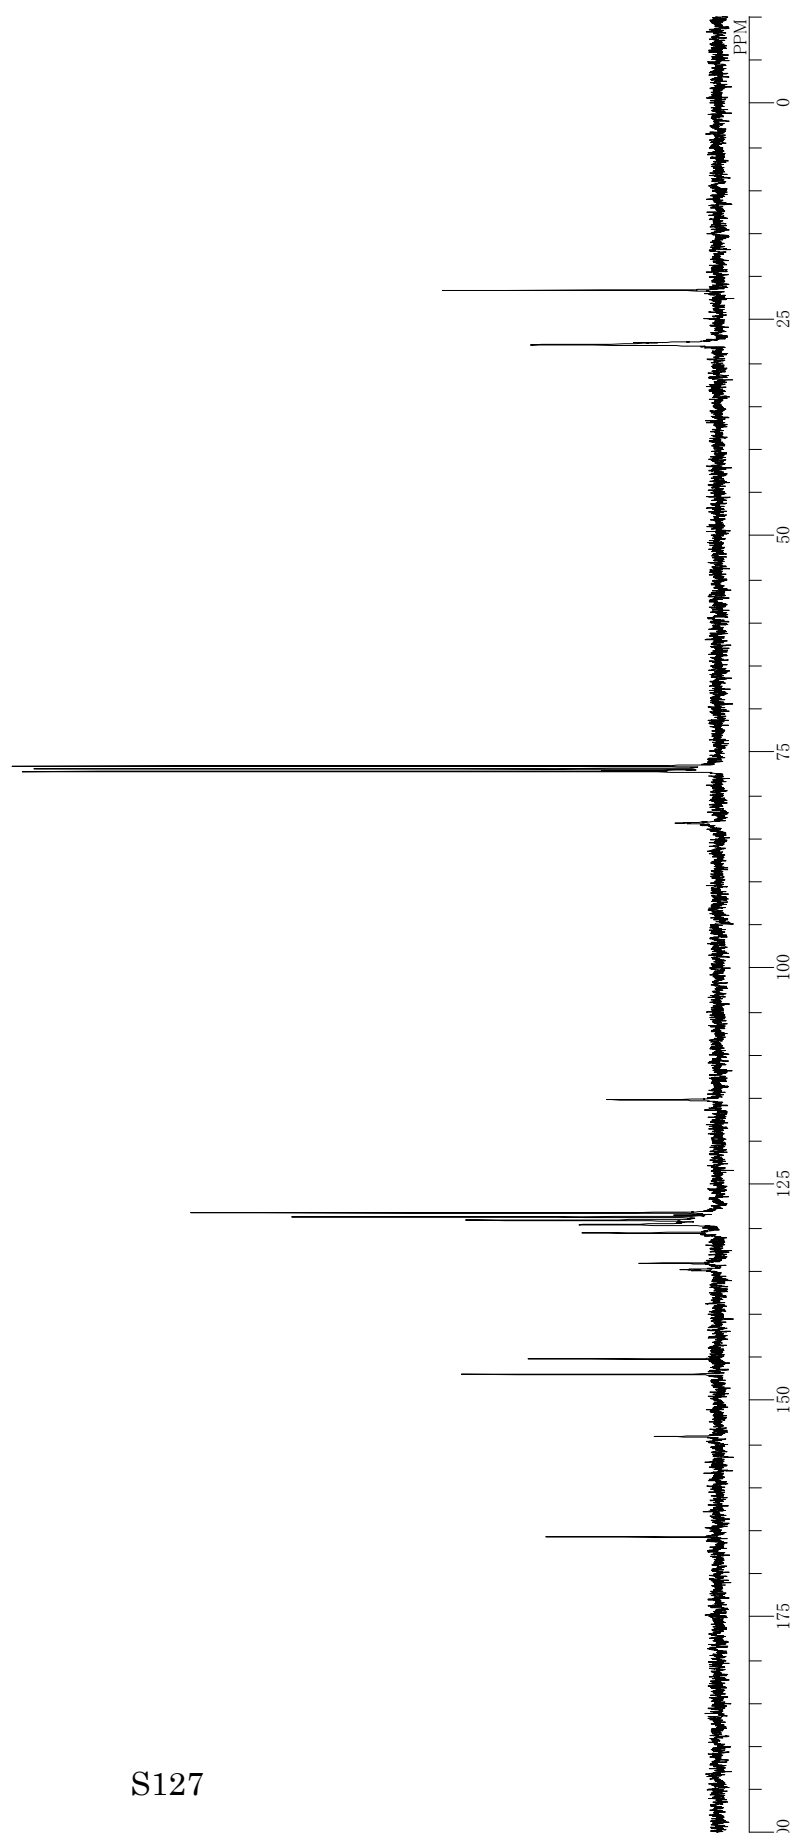

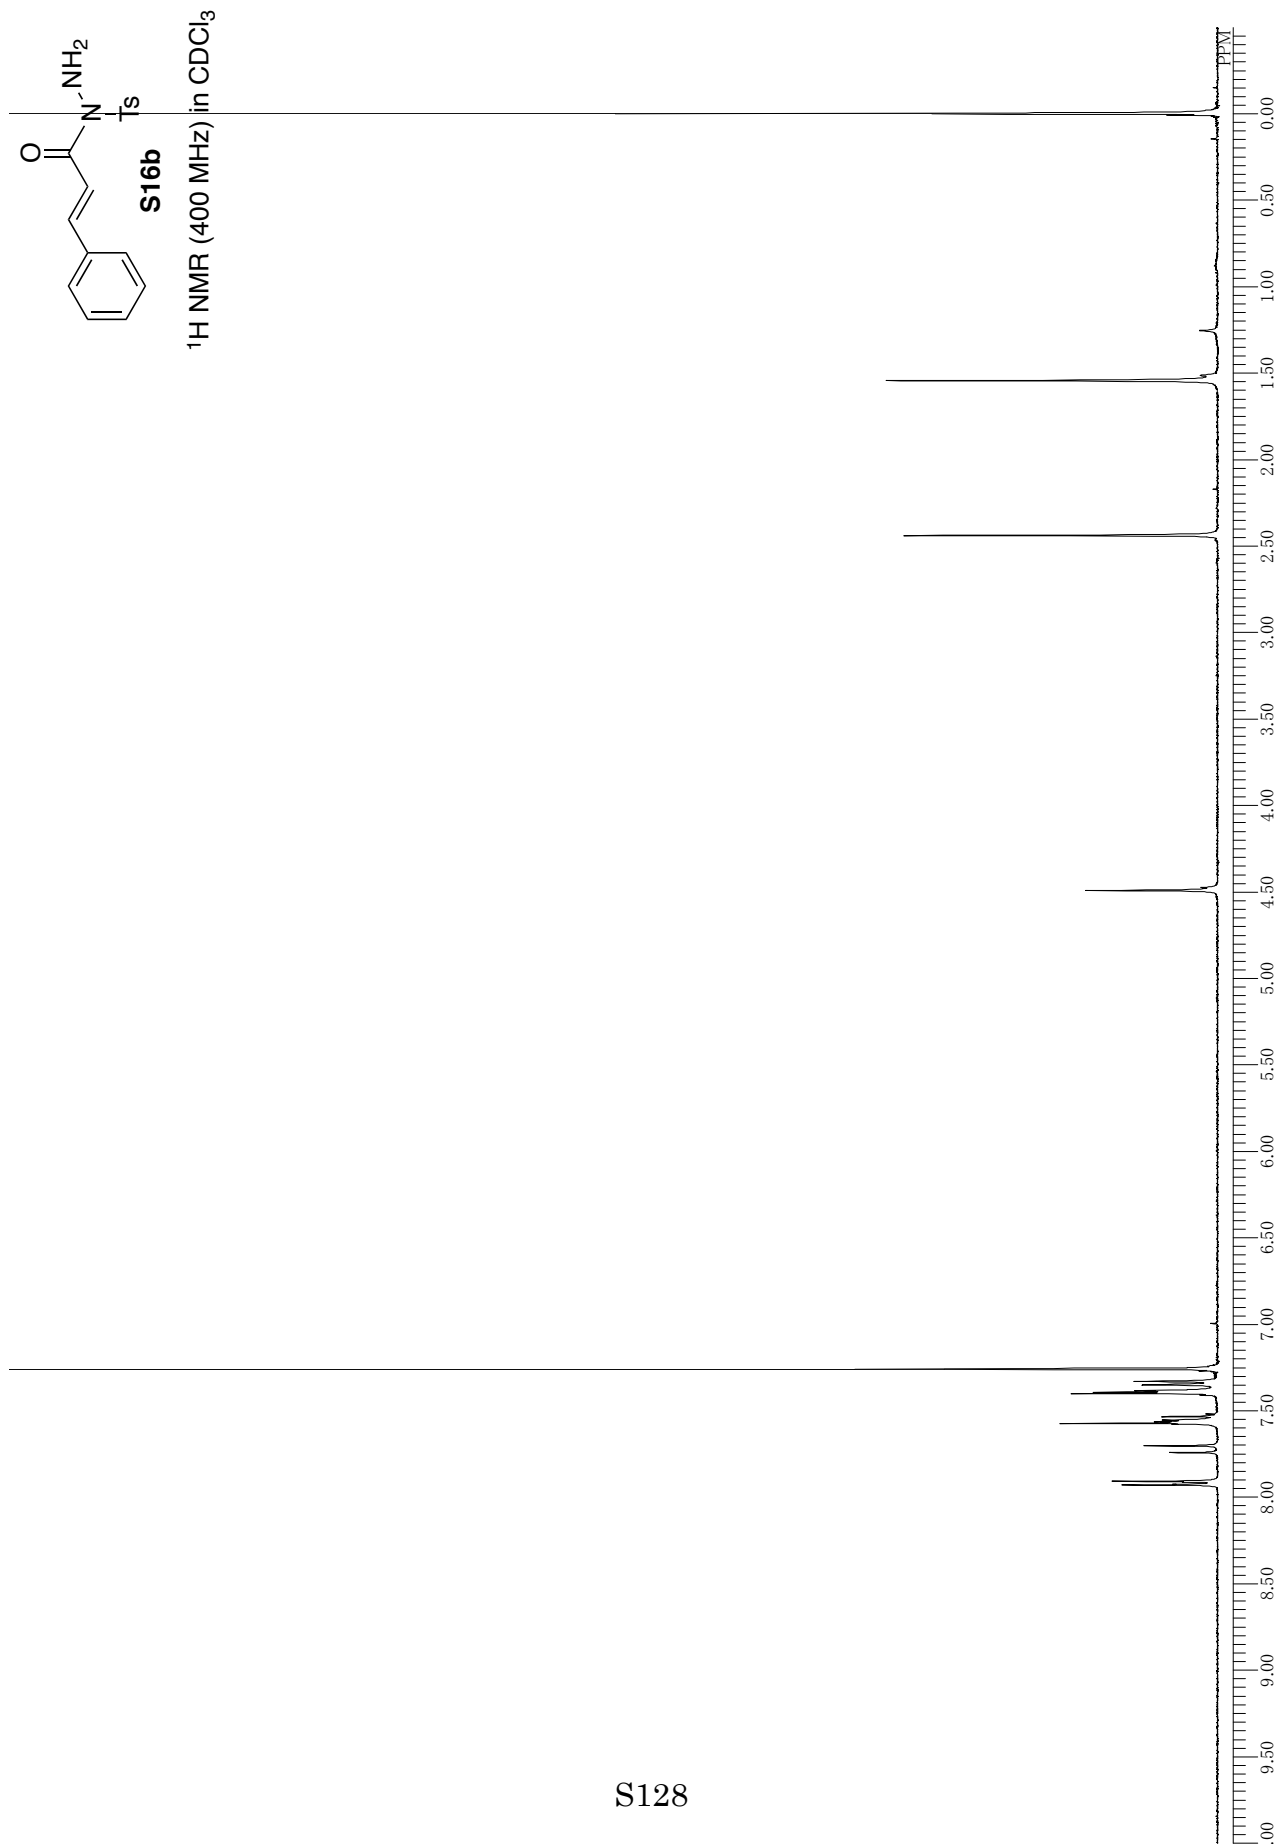

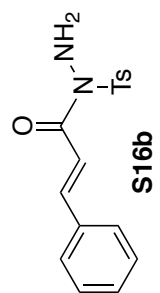

<sup>13</sup>C NMR (100 MHz) in CDCl<sub>3</sub>

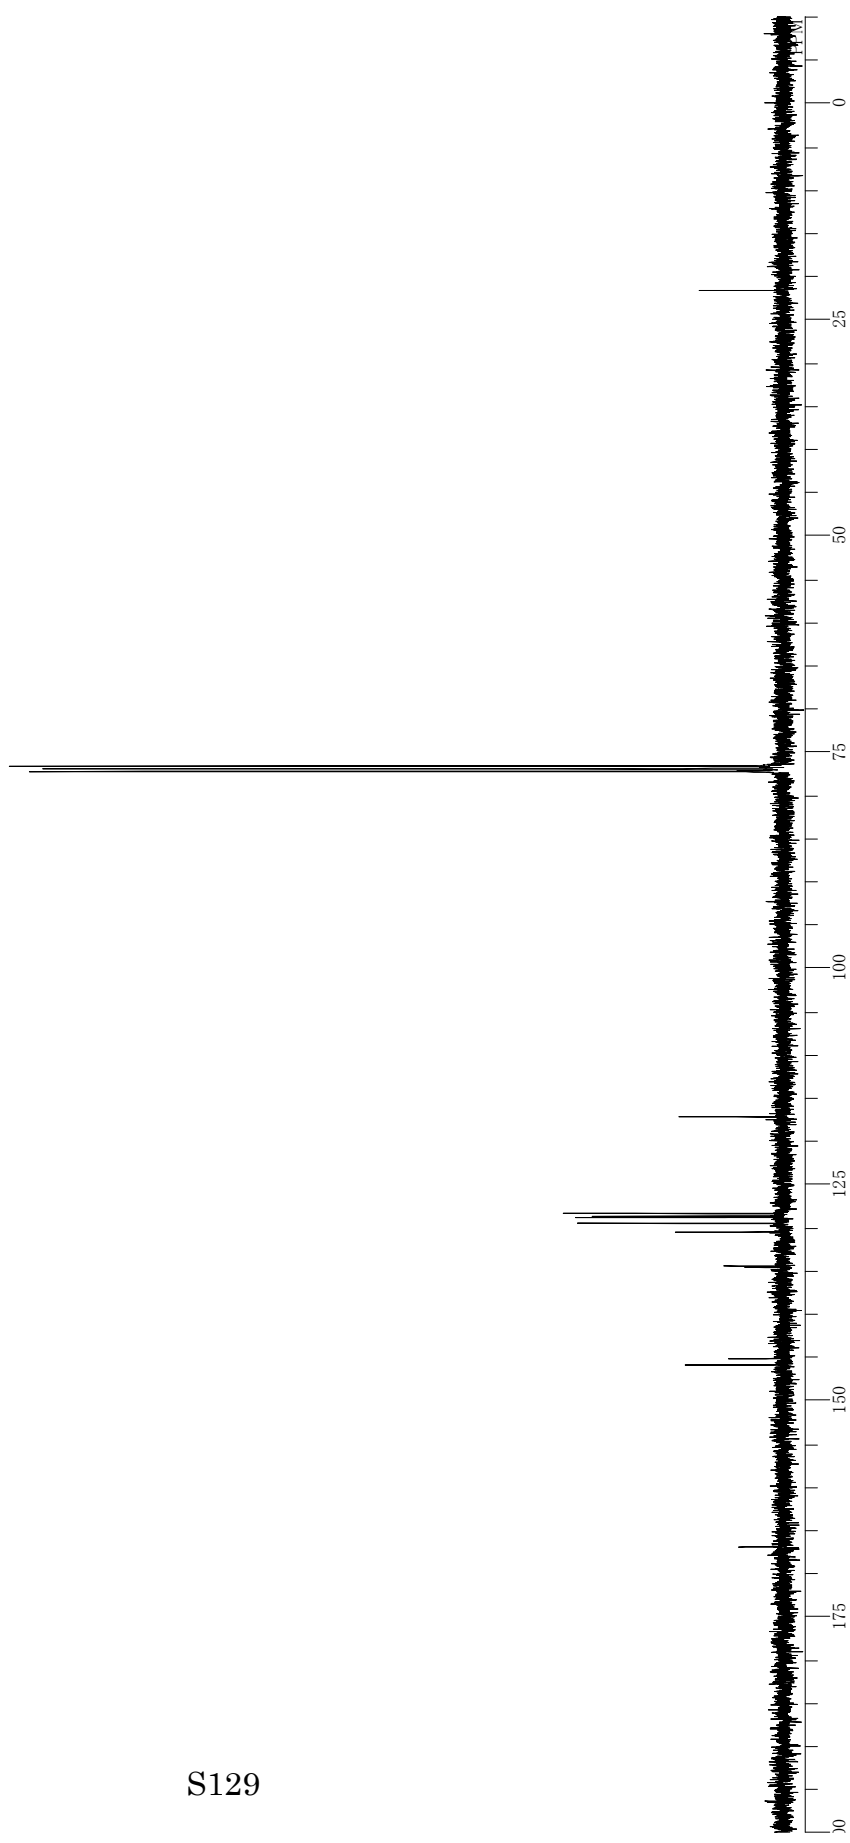

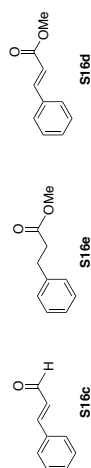

<sup>1</sup>H NMR (400 MHz) in CDCl<sub>3</sub>

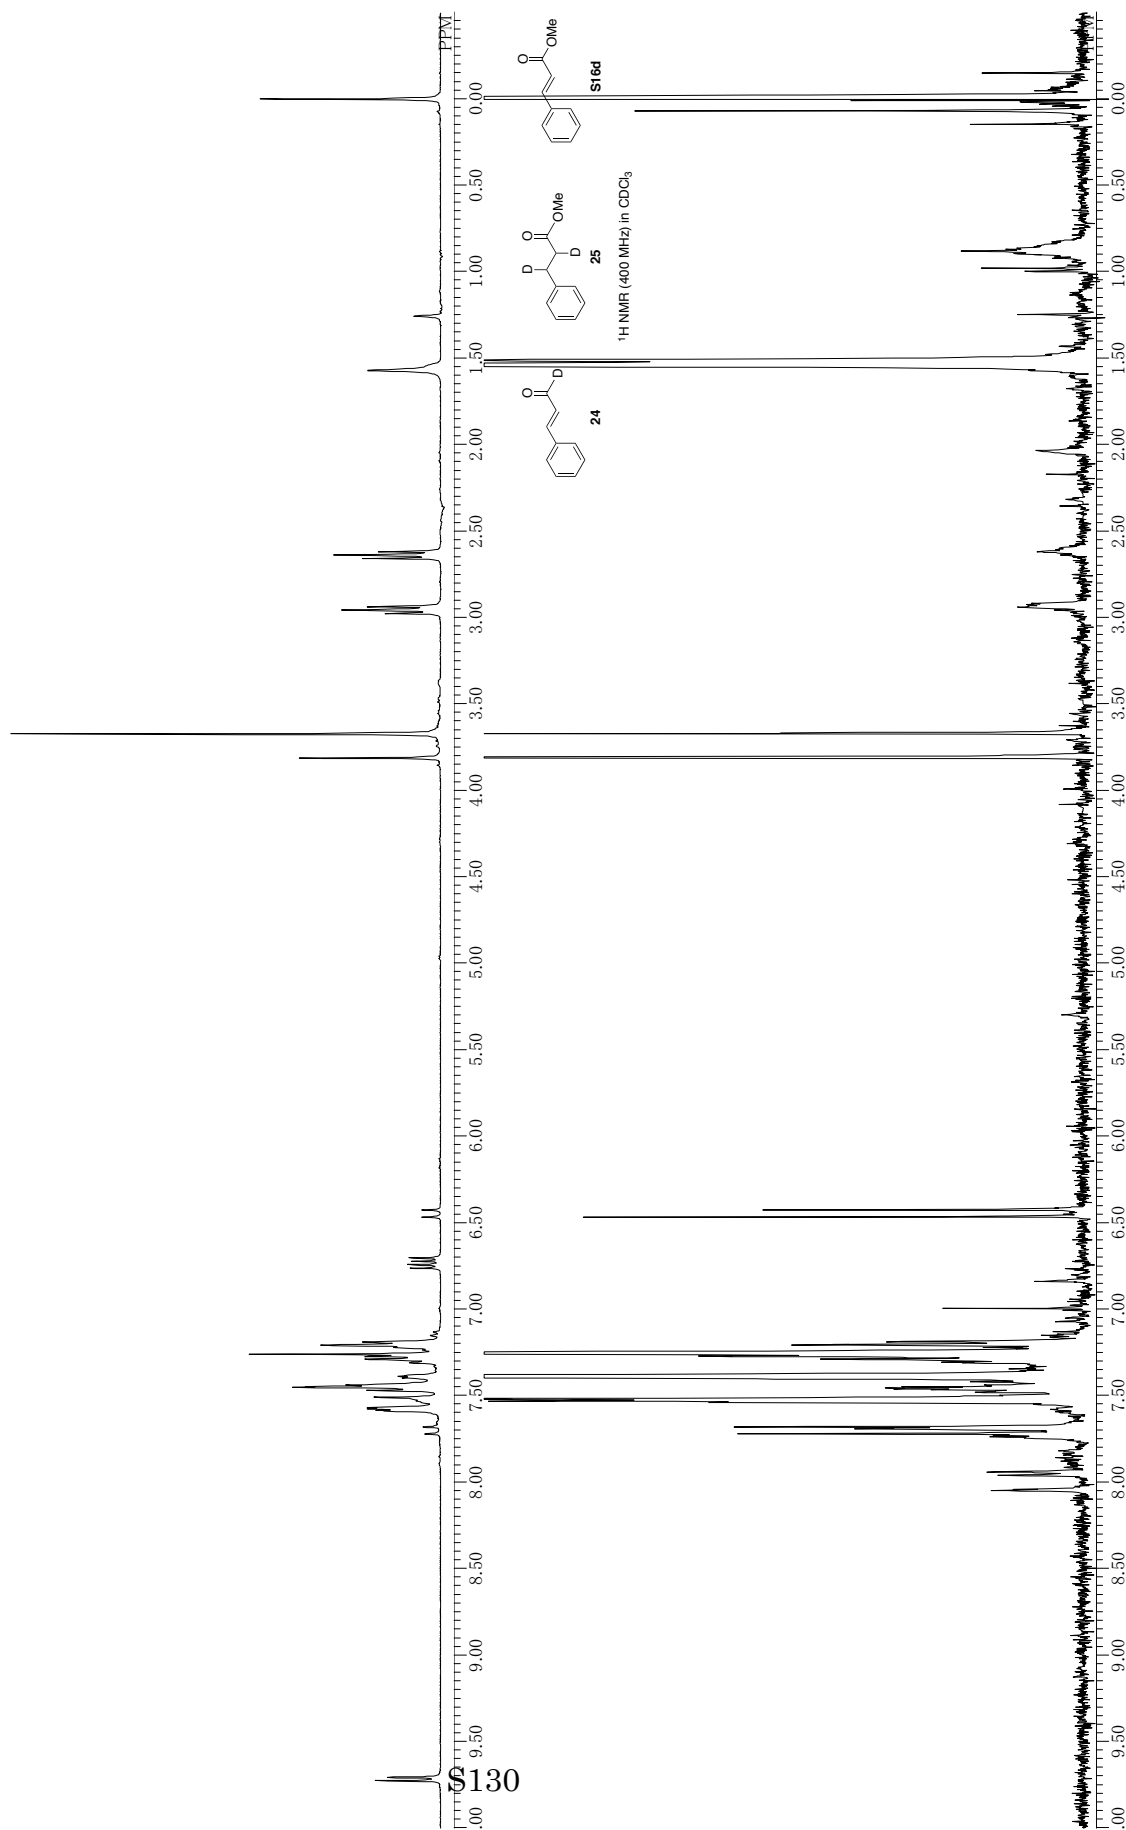

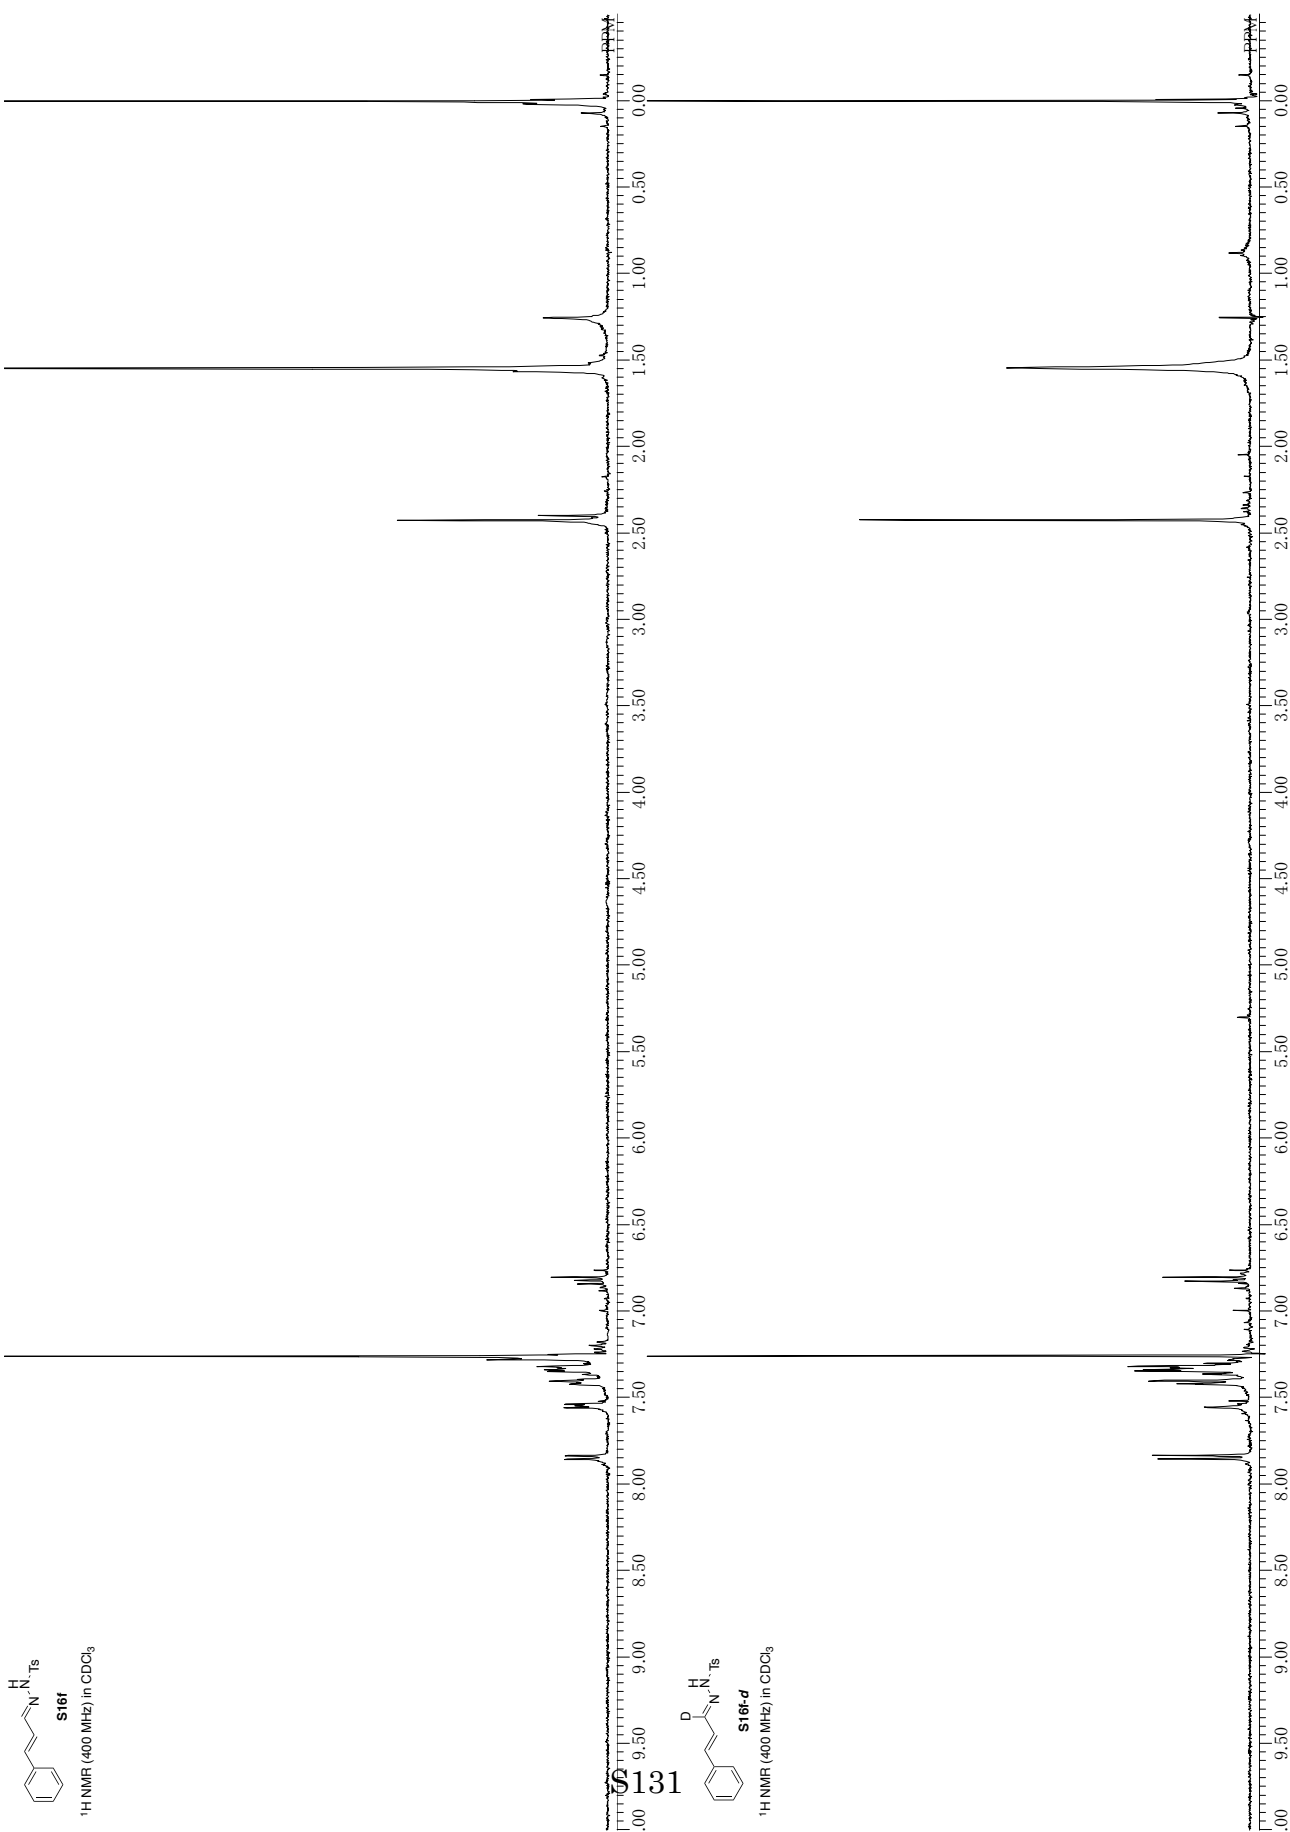

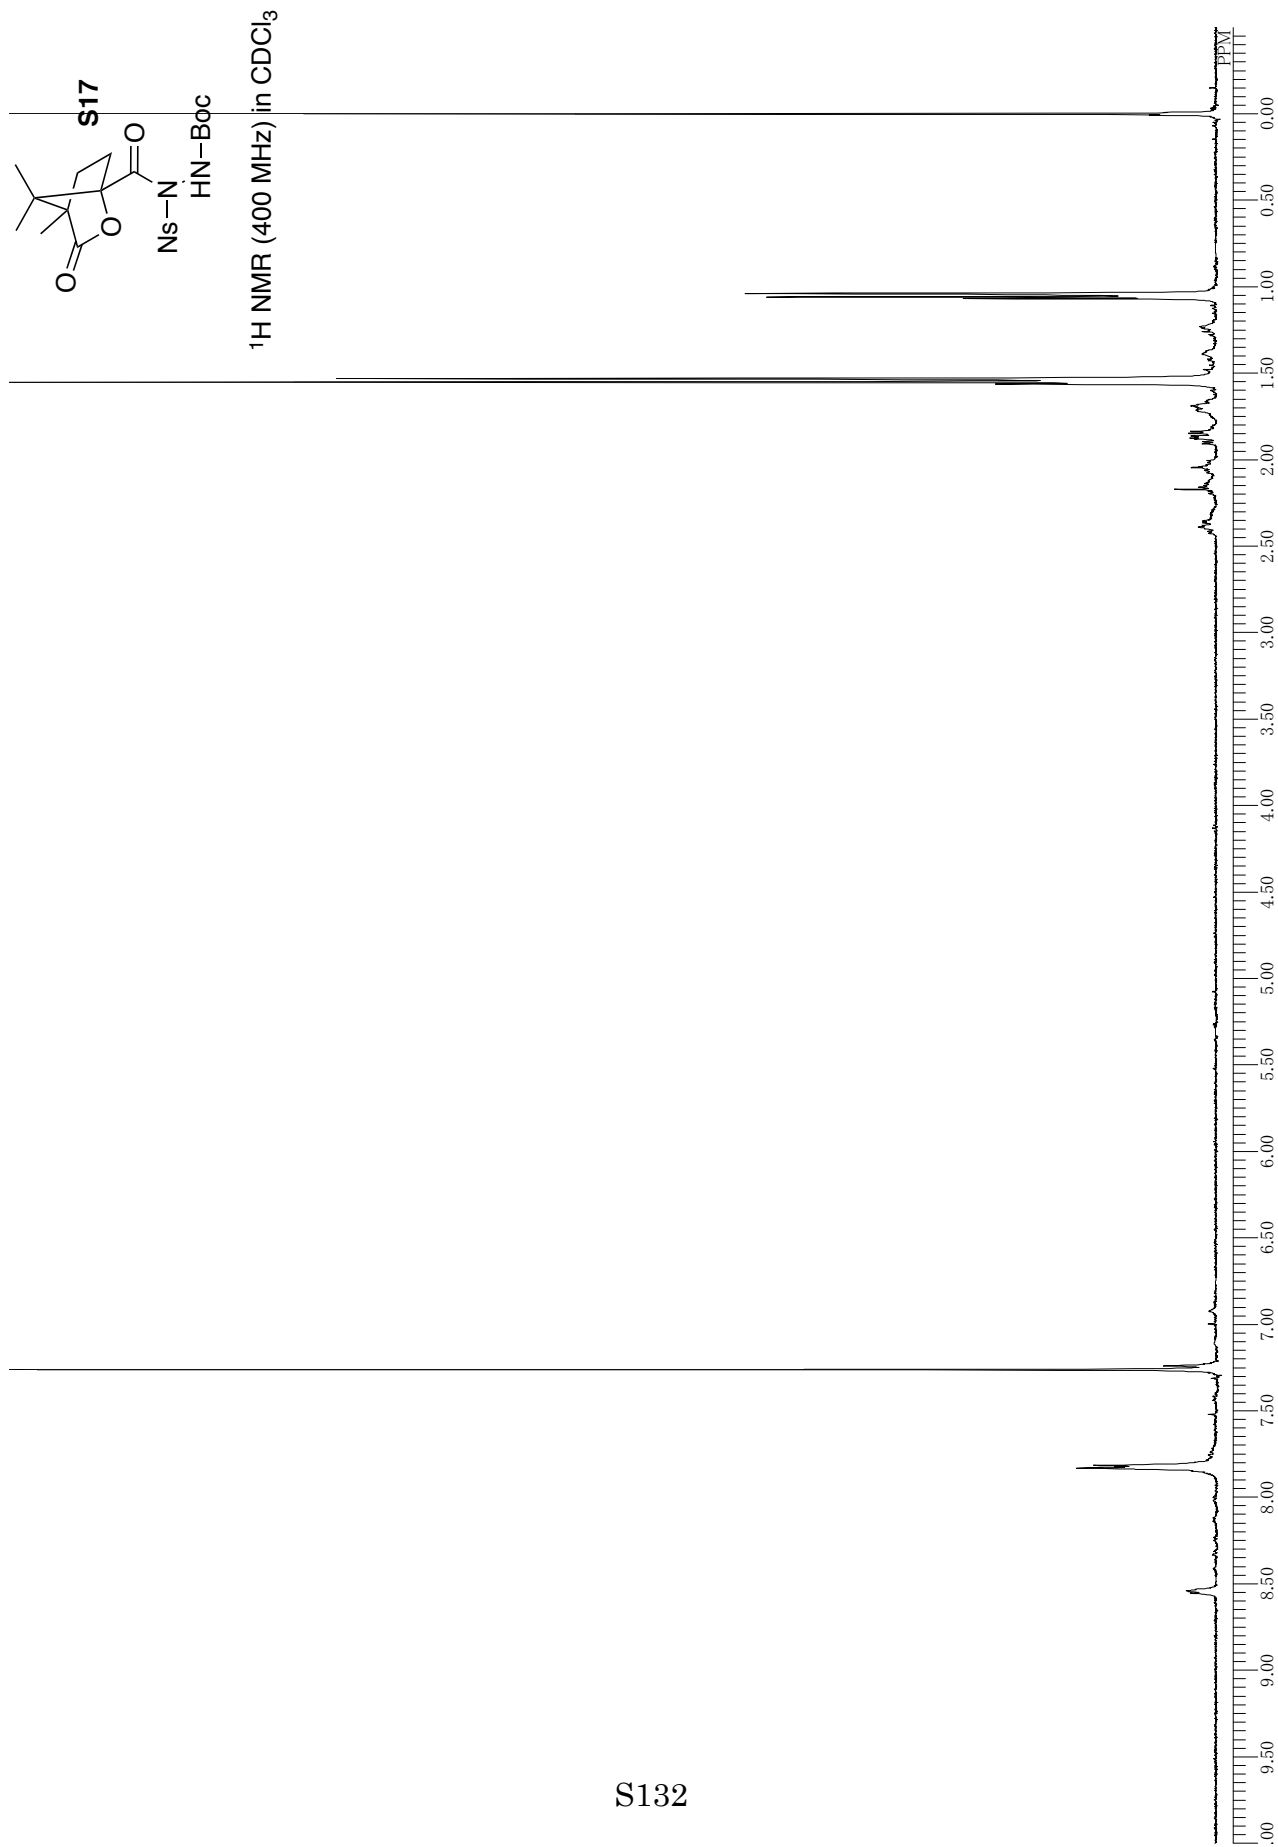



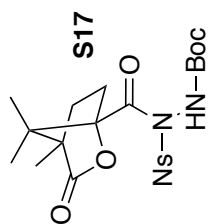

$^{13}\text{C}$  NMR (100 MHz) in  $\text{CDCl}_3$

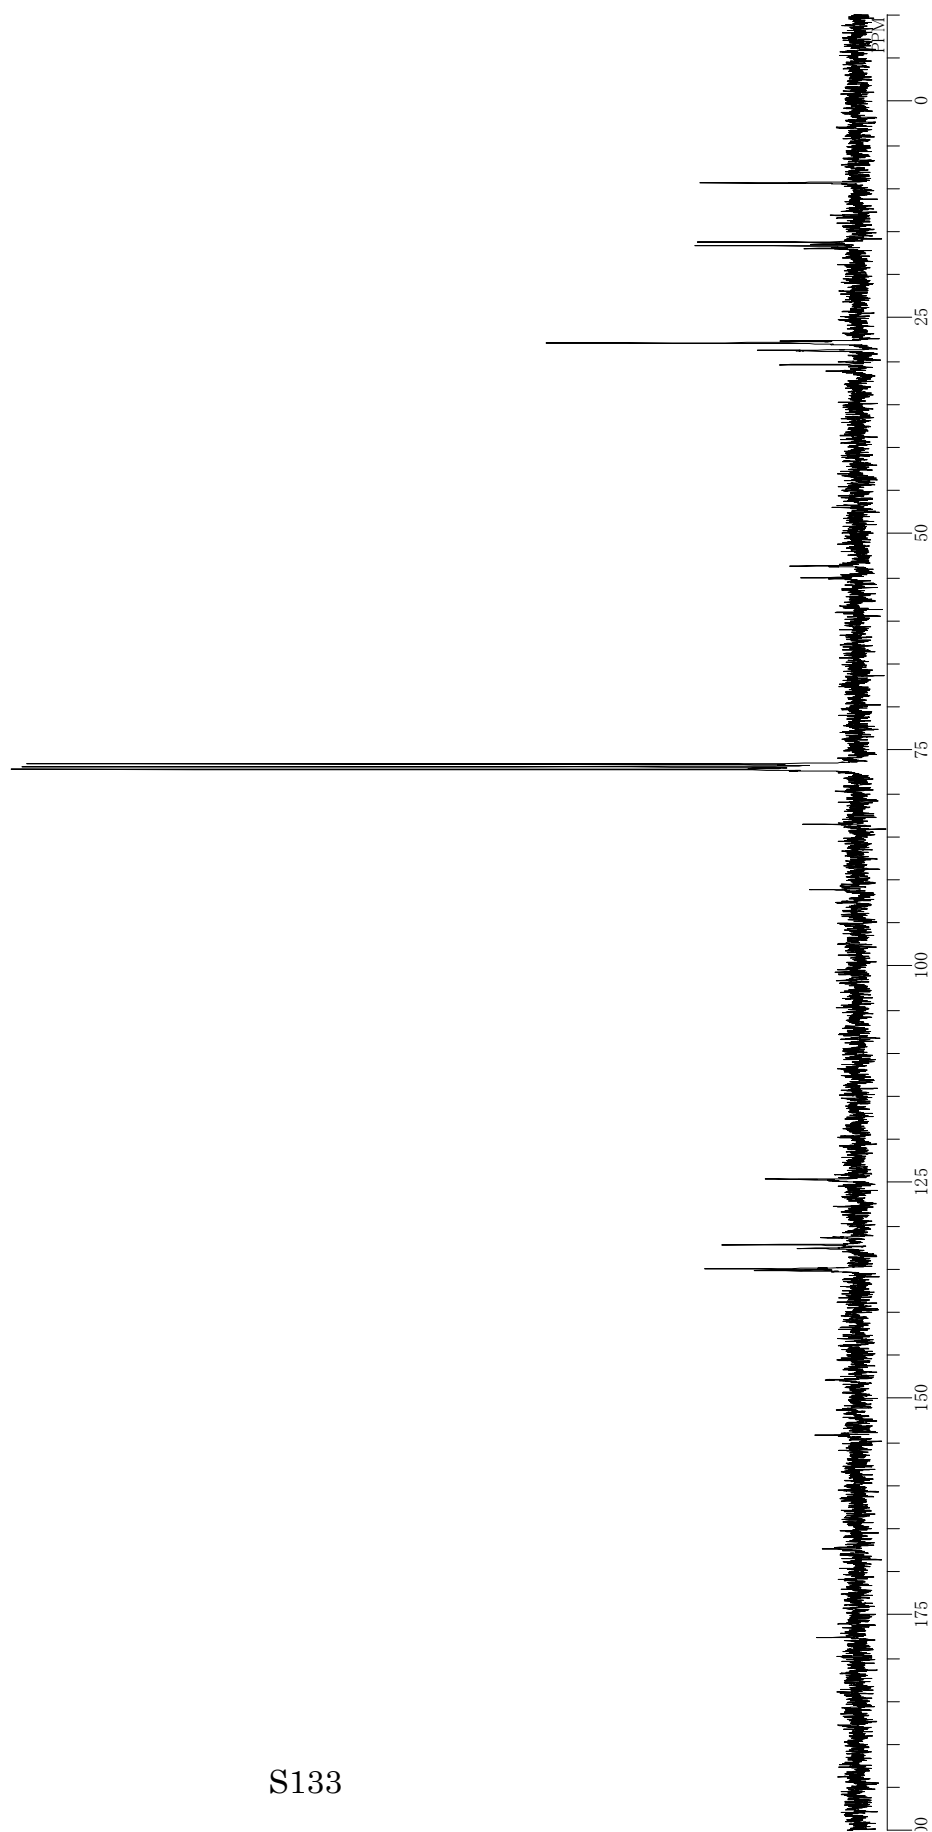

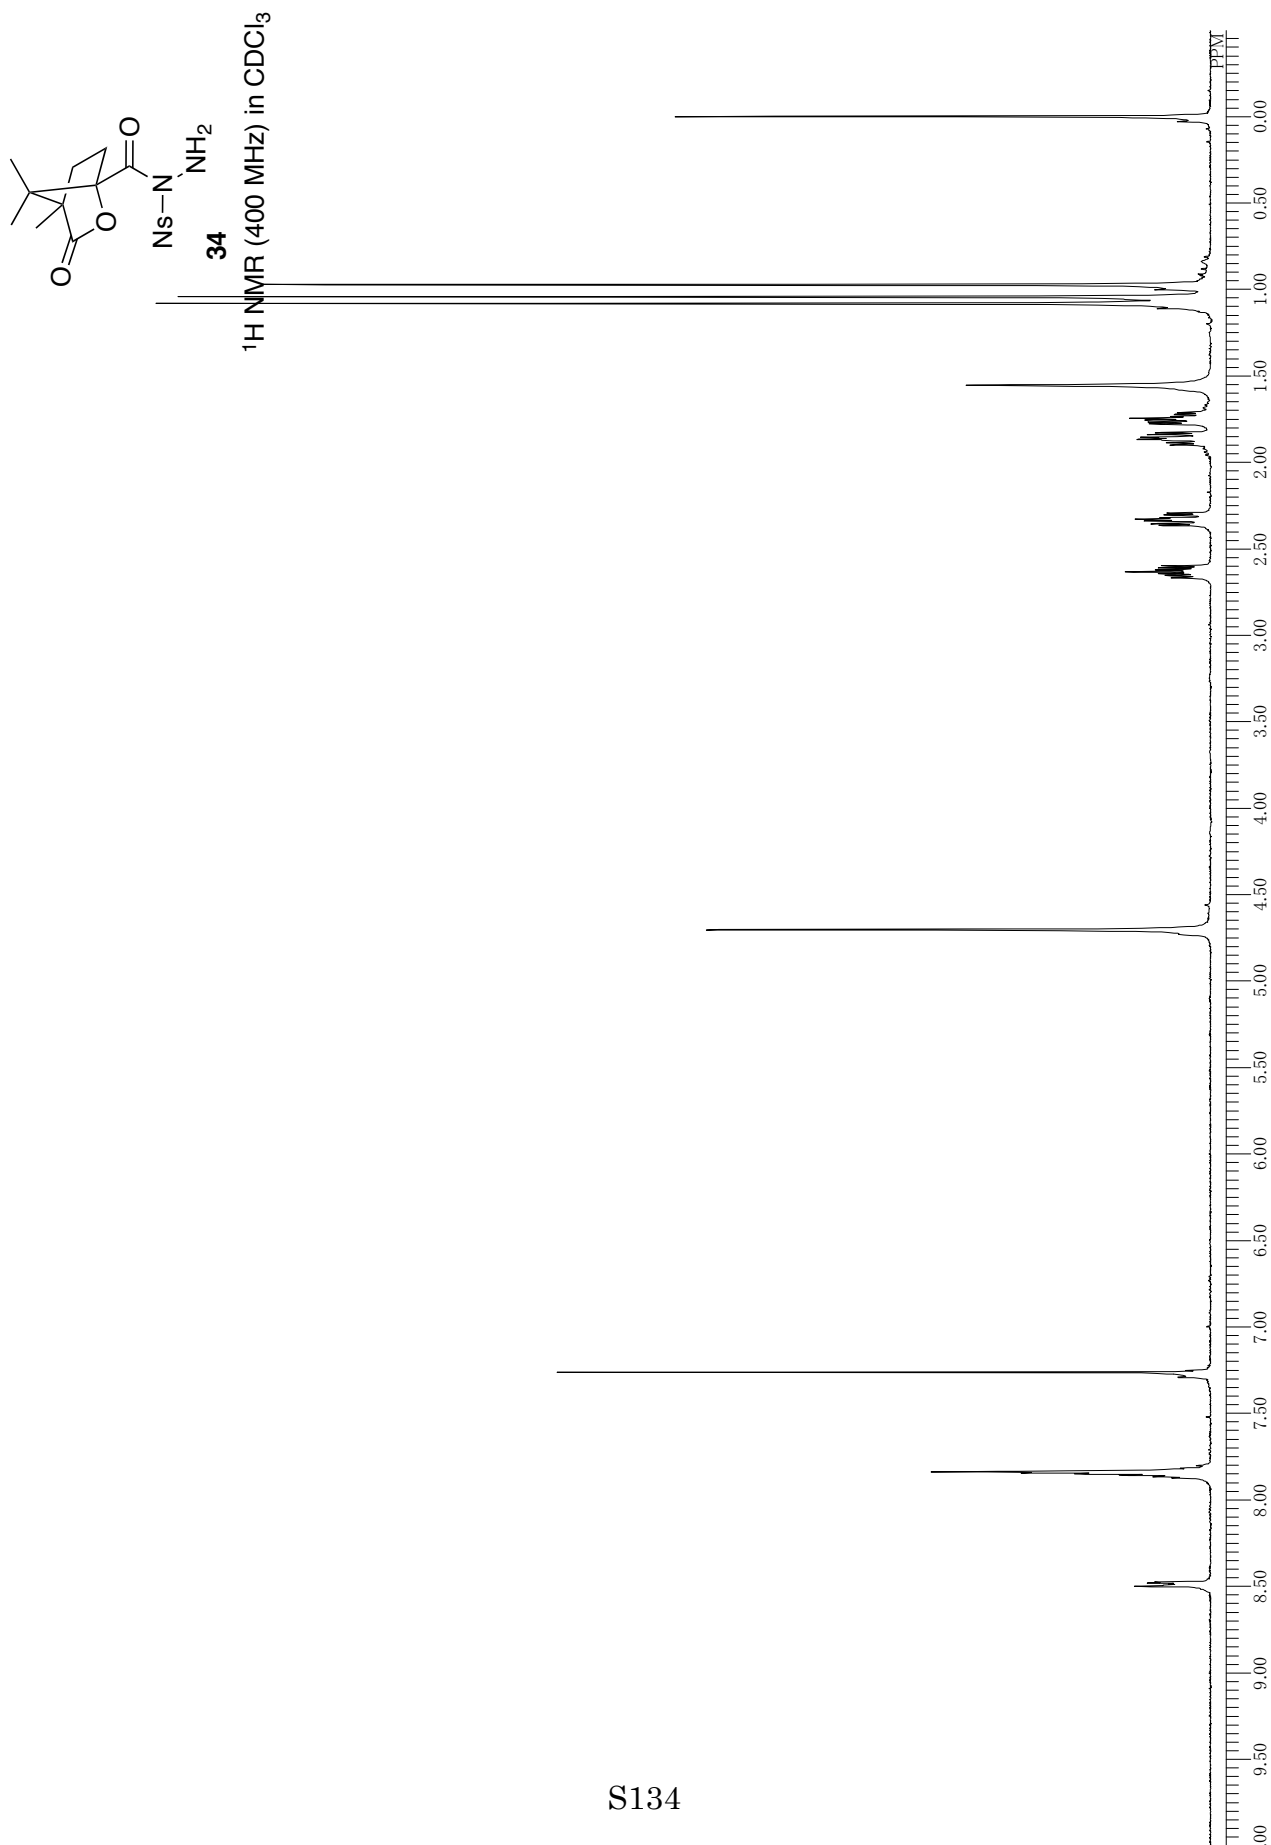

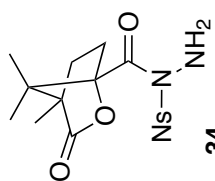

**34**

<sup>13</sup>C NMR (100 MHz) in CDCl<sub>3</sub>

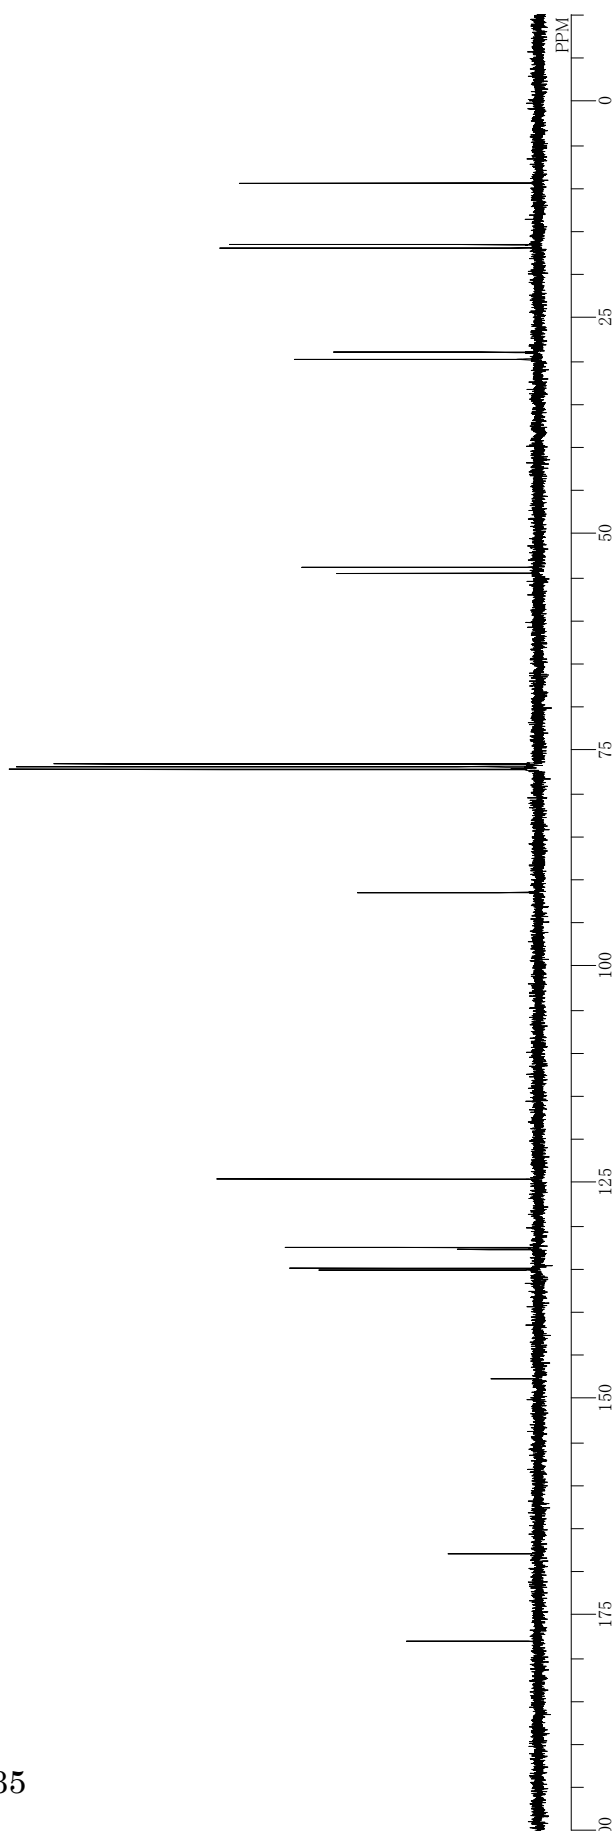

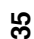 $^1\text{H}$  NMR (400 MHz) in  $\text{CDCl}_3$ 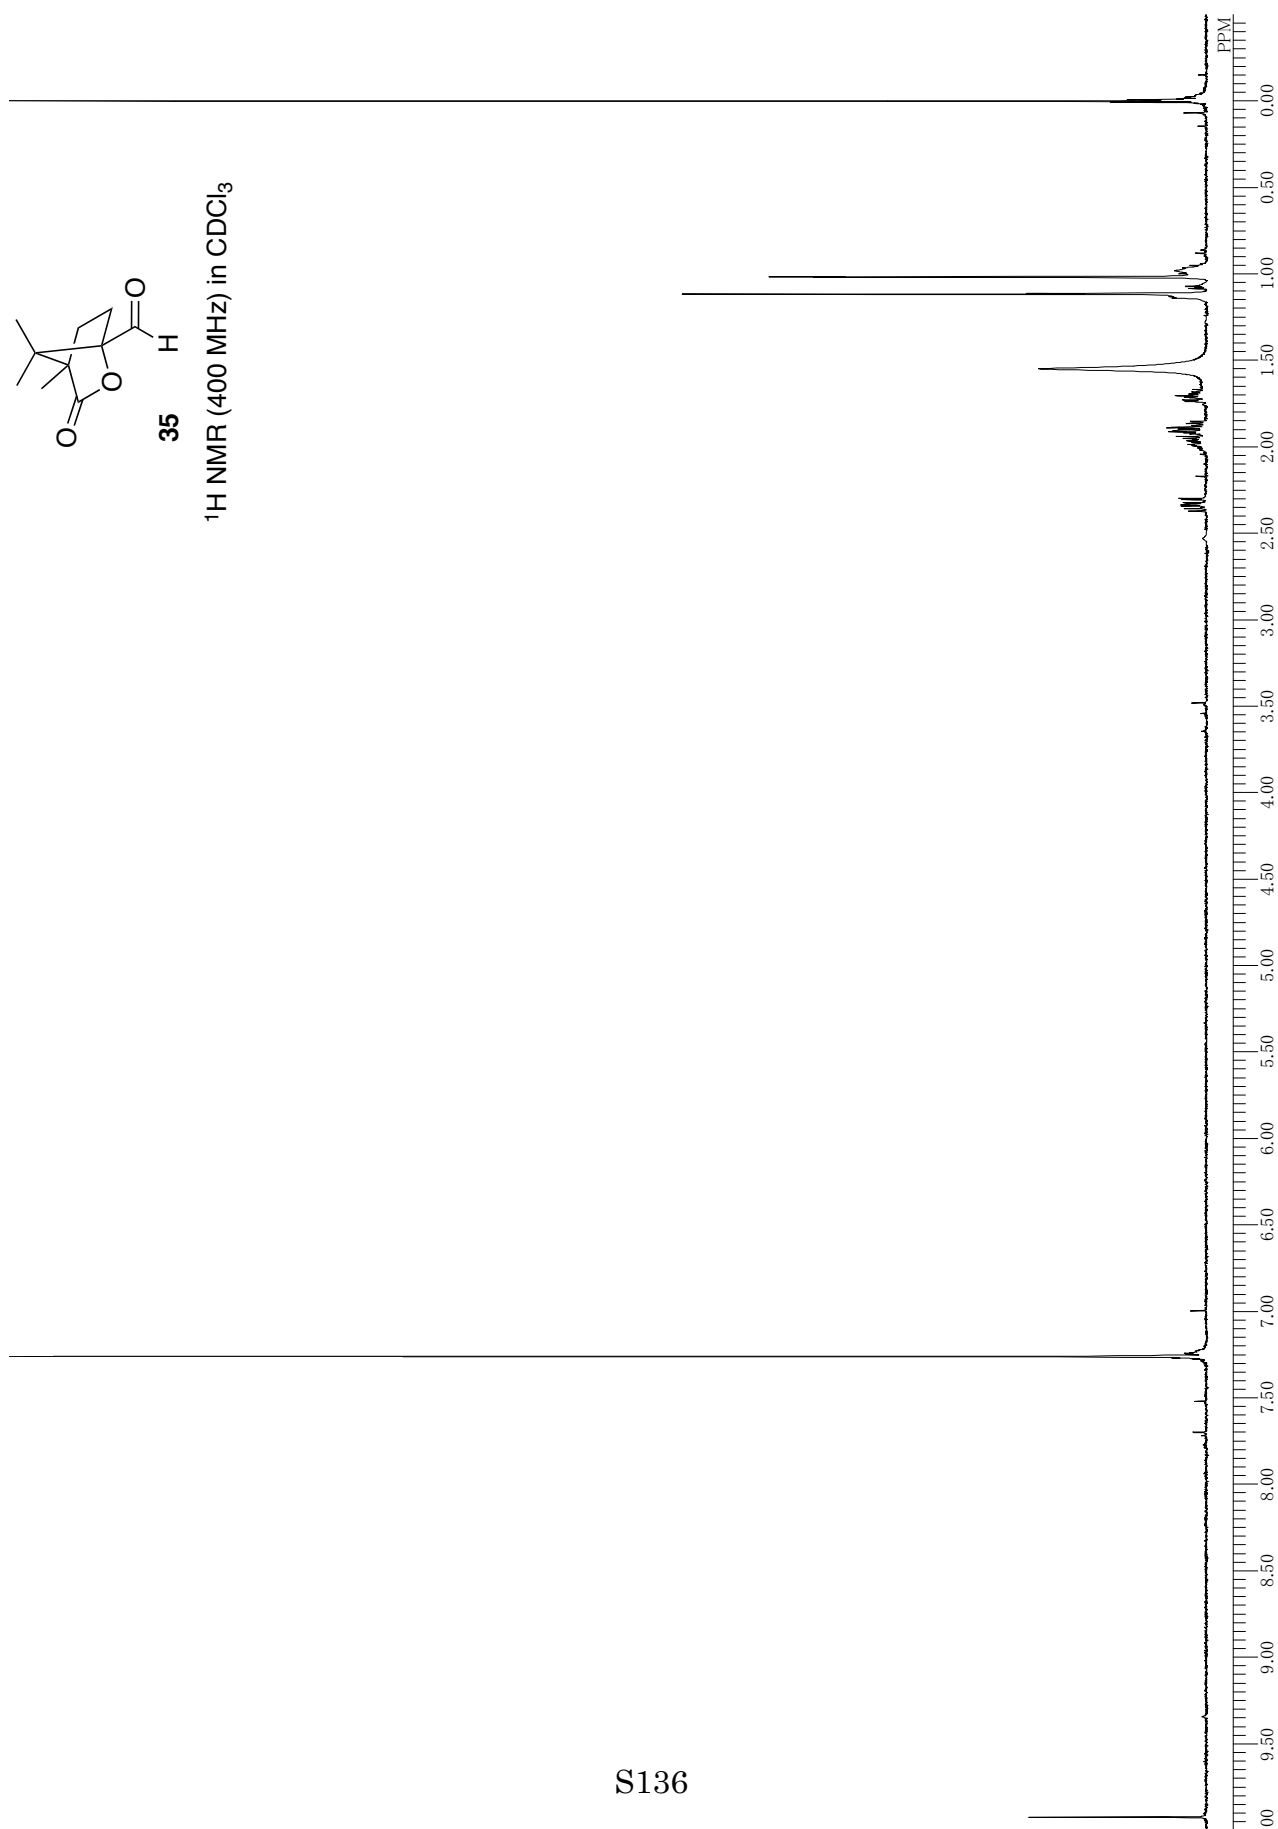

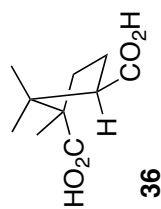

$^1\text{H}$  NMR (400 MHz) in  $\text{CDCl}_3$

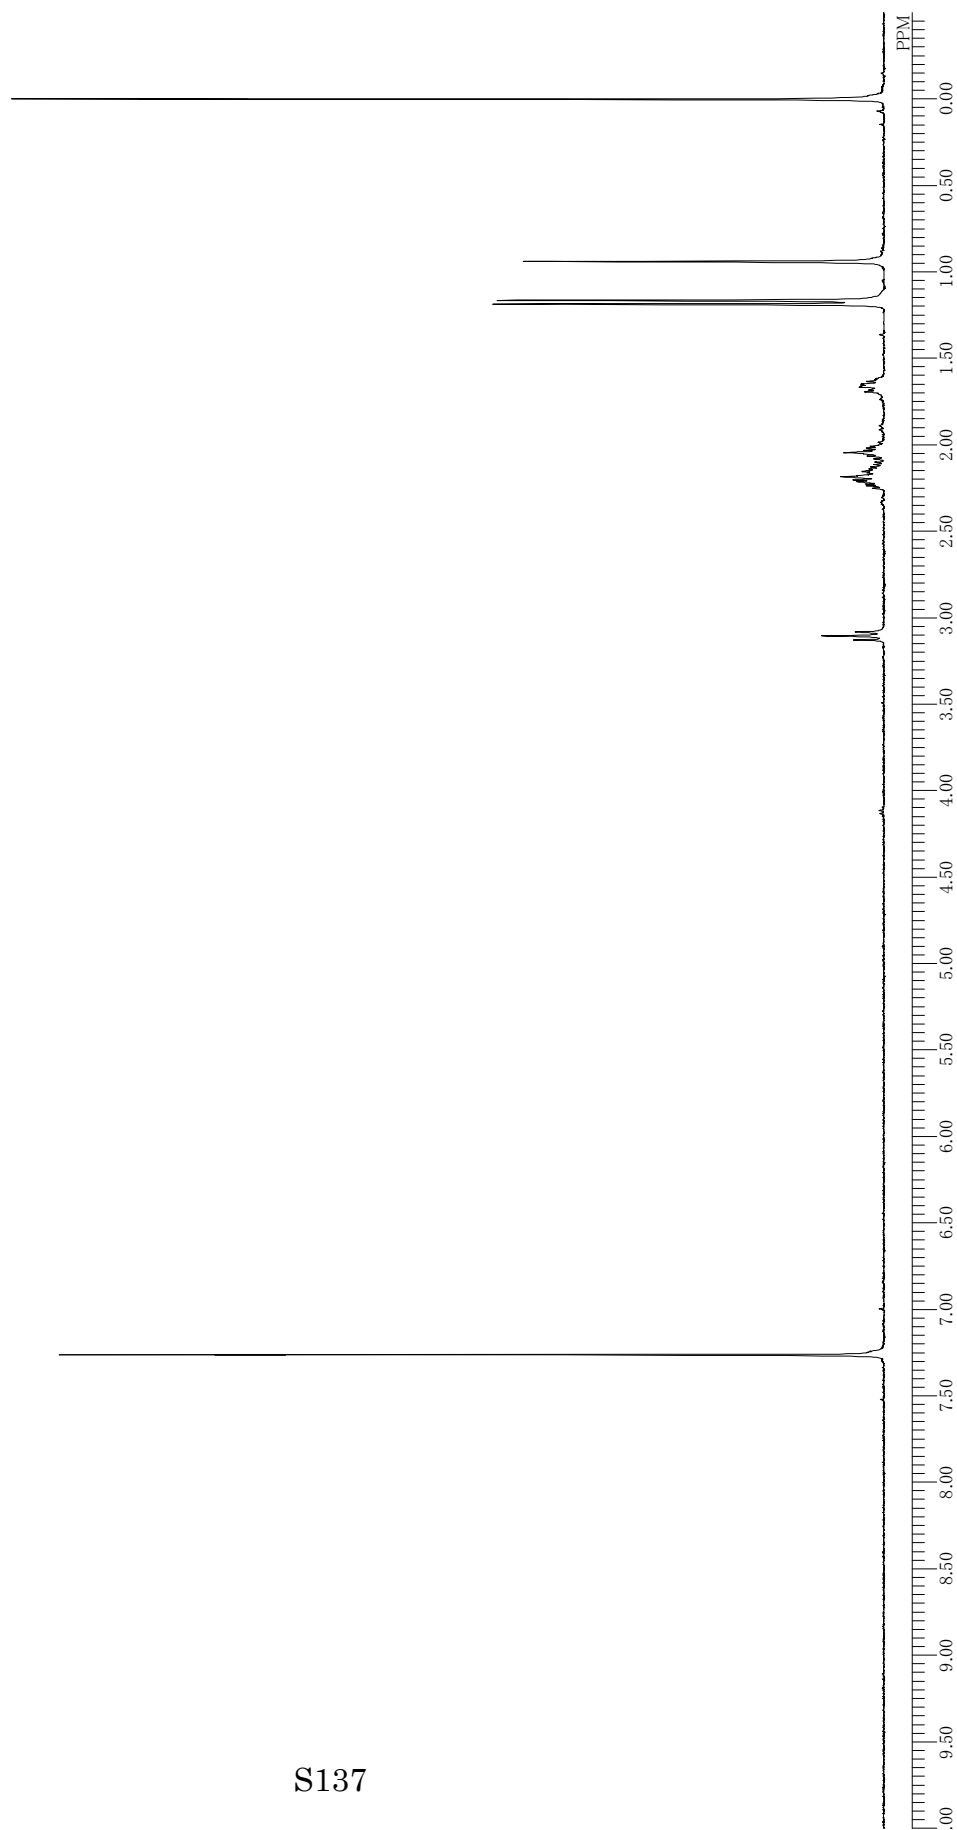

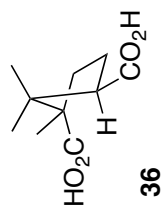

$^1\text{H}$  NMR (400 MHz) in  $\text{DMSO}-d_6$

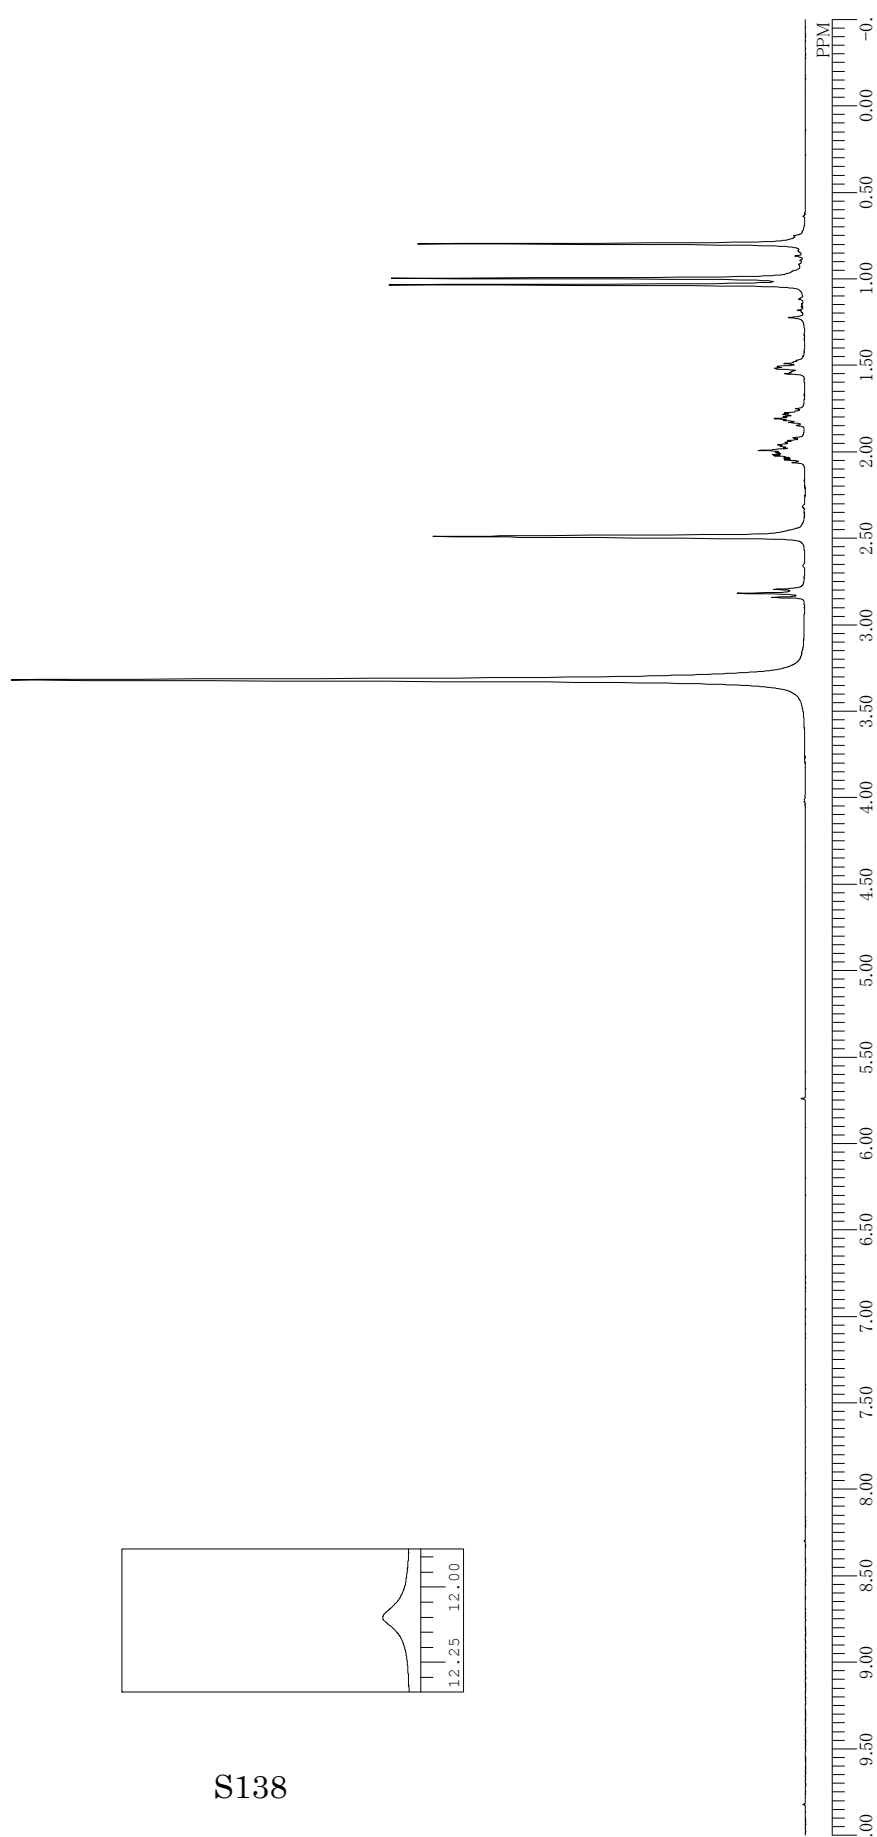

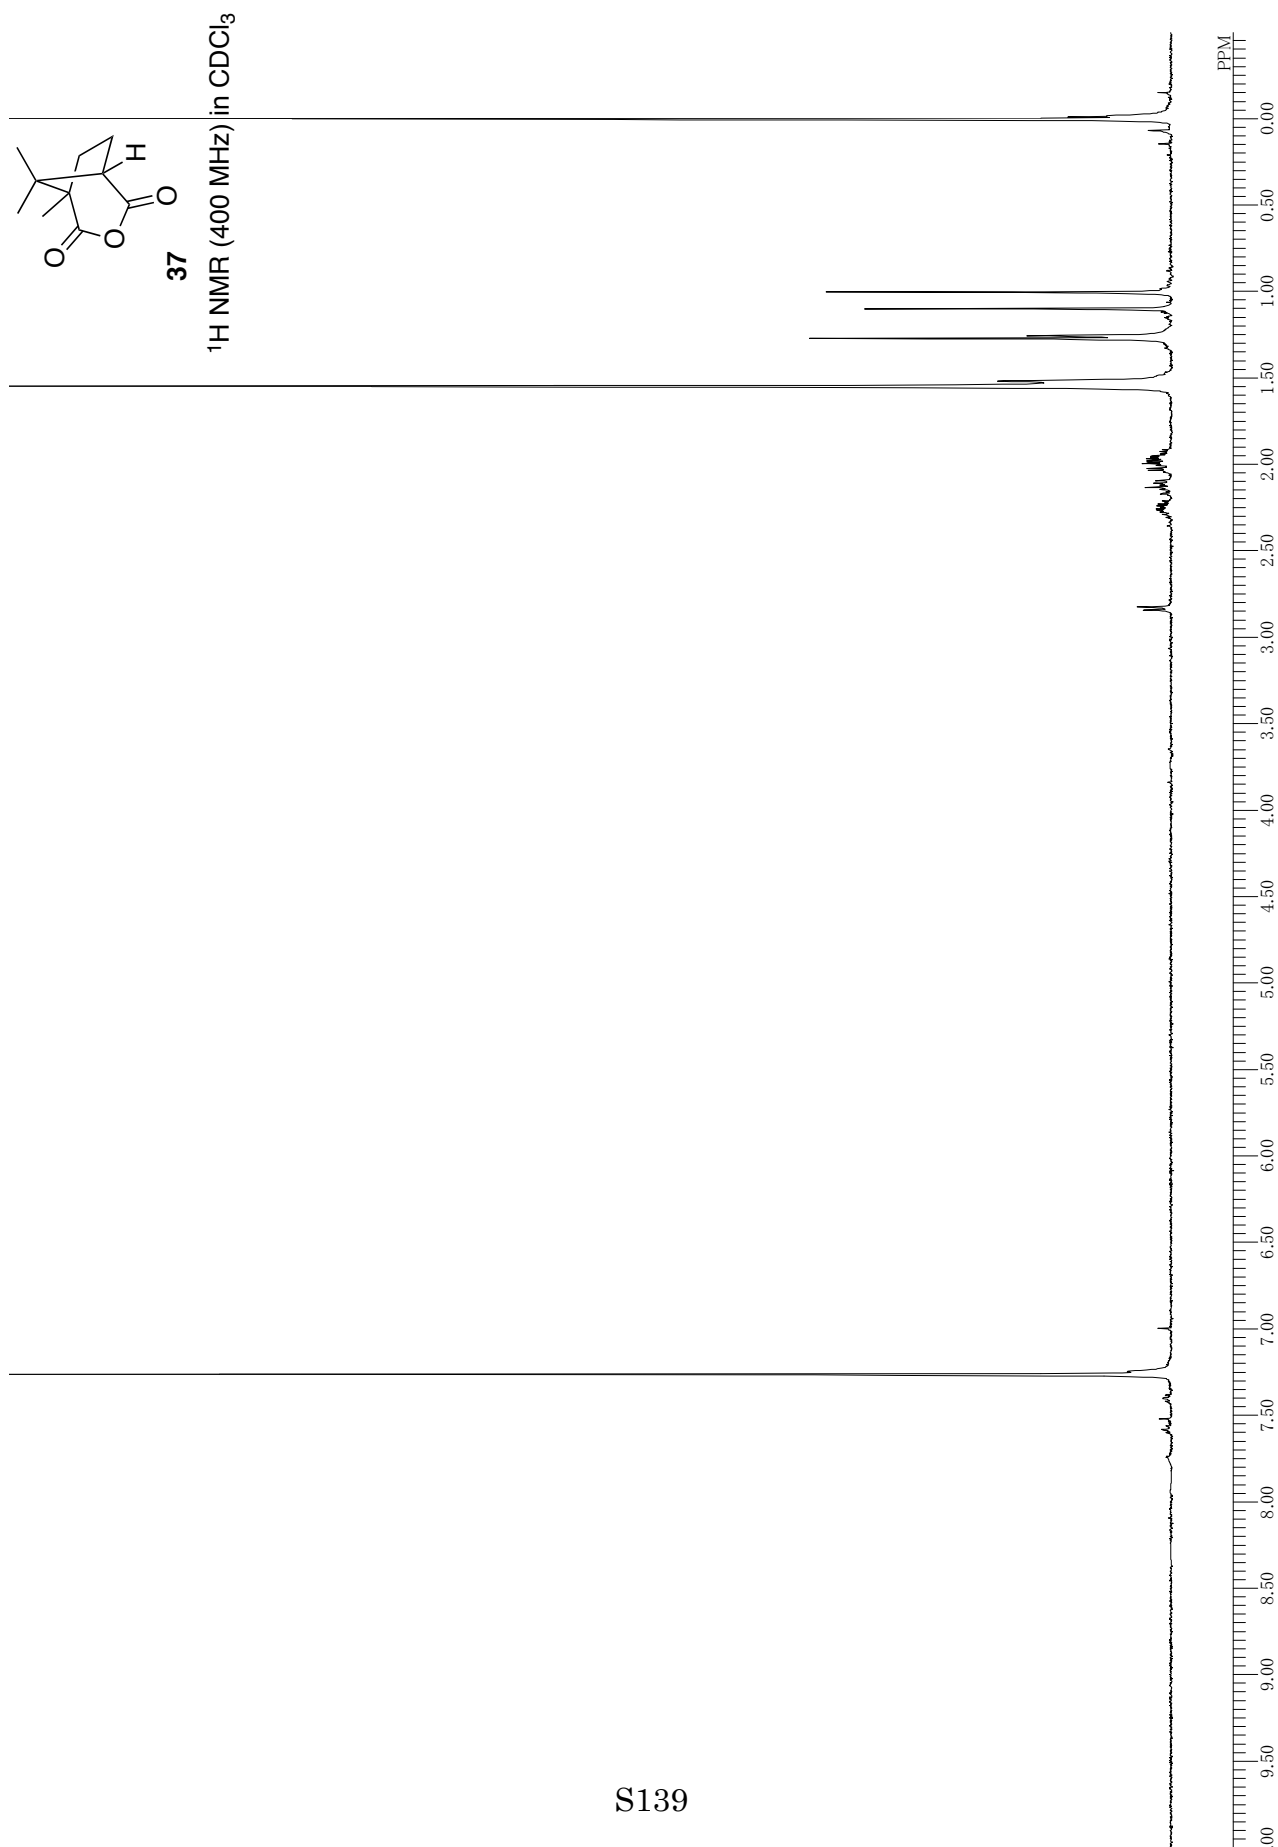

Supplement: c2sc22045h.pdf [file c2sc22045h.pdf]
